# Supplementary material for: Label-Free Proteomic Analysis of Protein Changes in the Striatum during Chronic Ethanol Use and Early Withdrawal
Source: Front Behav Neurosci. 2016 Mar 11;10:46. doi: 10.3389/fnbeh.2016.00046 (PMC4786553; doi:10.3389/fnbeh.2016.00046)
Supplement: Supplementary file 4 [file DataSheet2.XLS]

## Sheet: molecules
© 2000-2015 QIAGEN. All rights reserved.
Symbol	Entrez Gene Name	GenPept/UniProt/Swiss-Prot Accession	Exp Fold Change	Exp p-value	Exp False Discovery Rate (q-value)	Networks	Location	Type(s)	Biomarker Application(s)	Drug(s)	Entrez Gene ID for Human	Entrez Gene ID for Mouse	Entrez Gene ID for Rat
AATK	apoptosis-associated tyrosine kinase	Q80YE4-2	-1.716	1.54E-06	6.89E-05	8	Cytoplasm	kinase			9625	11302	690853
ABCF3	ATP-binding cassette, sub-family F (GCN20), member 3	Q8K268	-1.783	6.49E-07	3.09E-05		Other	transporter			55324	27406	287982
ACSL6	acyl-CoA synthetase long-chain family member 6	Q91WC3	1.302	6.83E-11	6.81E-09		Cytoplasm	enzyme			23305	216739	117243
ADAM10	ADAM metallopeptidase domain 10	--					Plasma Membrane	peptidase			102	11487	29650
ADCY3	adenylate cyclase 3	Q8VHH7	-1.429	1.56E-06	6.92E-05	3	Plasma Membrane	enzyme			109	104111	64508
ADCYAP1	adenylate cyclase activating polypeptide 1 (pituitary)	--				4	Extracellular Space	other			116	11516	24166
ADCYAP1R1	adenylate cyclase activating polypeptide 1 (pituitary) receptor type I	--				2	Plasma Membrane	G-protein coupled receptor			117	11517	24167
ADRB2	adrenoceptor beta 2, surface	--				3	Plasma Membrane	G-protein coupled receptor	diagnosis,efficacy,unspecified application	articaine/epinephrine, bupivacaine/epinephrine, carteolol, dipivefrin, meluadrine, epinephrine/prilocaine, epinephrine/lidocaine, bedoradrine, KUL 7211, arformoterol, indacaterol, myogane, budesonide/formoterol, nebivolol, vilanterol, olodaterol, formoterol/mometasone furoate, glycopyrrolate/indacaterol, fluticasone furoate/vilanterol, latanoprost/timolol, umeclidinium/vilanterol, epinephrine/met…	154	11555	24176
AES	amino-terminal enhancer of split	Q08117	2.027	7.84E-11	7.67E-09	3	Nucleus	transcription regulator			166	14797	29466
AKAP2	A kinase (PRKA) anchor protein 2	O54931-5	-2.939	2.57E-08	1.66E-06	4	Plasma Membrane	other			11217	11641	298024
AKT1	v-akt murine thymoma viral oncogene homolog 1	P31750	-1.227	1.45E-01	4.04E-01	5	Cytoplasm	kinase	diagnosis,efficacy,response to therapy	MK2206, GSK2141795, ipatasertib, LY2780301, ARQ 092, AZD5363, BAY1125976, MPT0E028, archexin, enzastaurin, perifosine	207	11651	24185
ALCAM	activated leukocyte cell adhesion molecule	Q61490	-1.618	1.61E-05	5.70E-04	5	Plasma Membrane	other	prognosis		214	11658	79559
APP	amyloid beta (A4) precursor protein	P12023-2	1.190	1.57E-01	4.23E-01	3,5	Plasma Membrane	other	diagnosis,efficacy,unspecified application	bapineuzumab, florbetapir F18, florbetaben F	351	11820	54226
ARHGEF7	Rho guanine nucleotide exchange factor (GEF) 7	Q9ES28-7	-2.127	2.44E-01	5.49E-01	1	Cytoplasm	other			8874	54126	114559
ATXN1	ataxin 1	P54254	-2.315	7.58E-04	1.29E-02		Nucleus	transcription regulator			6310	20238	25049
B2M	beta-2-microglobulin	P01887	1.713	1.24E-08	8.22E-07	4	Plasma Membrane	transmembrane receptor	disease progression,efficacy,safety,unspecified application		567	12010	24223
BCAT1	branched chain amino-acid transaminase 1, cytosolic	P24288	1.634	3.24E-19	8.24E-17		Cytoplasm	enzyme			586	12035	29592
BCL2L1	BCL2-like 1	Q64373-2	1.941	3.87E-06	1.60E-04	1	Cytoplasm	other	efficacy,prognosis		598	12048	24888
BCL2L12	BCL2-like 12 (proline rich)	--					Nucleus	other			83596	75736	361567
BDNF	brain-derived neurotrophic factor	--				1,2,4	Extracellular Space	growth factor	efficacy,response to therapy		627	12064	24225
beta-estradiol	--	--				1	Other	chemical - endogenous mammalian	diagnosis,efficacy,safety
BID	BH3 interacting domain death agonist	P70444	-7.634	2.92E-24	1.06E-21	2	Cytoplasm	other			637	12122	64625
C2CD5	C2 calcium-dependent domain containing 5	Q7TPS5	-1.444	6.95E-06	2.68E-04		Cytoplasm	other			9847	74741	362461
Ca2+	--	--				2	Other	chemical - endogenous mammalian	diagnosis,efficacy,safety
CACNA1B	calcium channel, voltage-dependent, N type, alpha 1B subunit	O55017	-1.497	9.64E-18	2.04E-15	4	Plasma Membrane	ion channel		ziconotide, clevidipine butyrate, levetiracetam, gabapentin, bepridil, agmatine	774	12287	257648
CACNA1C	calcium channel, voltage-dependent, L type, alpha 1C subunit	Q01815-2	-1.788	1.11E-09	8.96E-08	2	Plasma Membrane	ion channel		cinnarizine, MEM-1003, amlodipine/olmesartan medoxomil, clevidipine butyrate, amlodipine/hydrochlorothiazide/valsartan, amlodipine/telmisartan, aliskiren/amlodipine, amlodipine/hydrochlorothiazide/olmesartan medoxomil, aliskiren/amlodipine/hydrochlorothiazide, nilvadipine, amlodipine/valsartan, amlodipine/perindopril, amlodipine/benazepril, diltiazem, verapamil, mibefradil, bepridil, enalapril/fe…	775	12288	24239
CACNA2D1	calcium channel, voltage-dependent, alpha 2/delta subunit 1	O08532-2	-1.099	4.99E-01	7.55E-01	4	Plasma Membrane	ion channel		amlodipine/hydrochlorothiazide/valsartan, amlodipine/telmisartan, aliskiren/amlodipine, amlodipine/hydrochlorothiazide/olmesartan medoxomil, nilvadipine, amlodipine/valsartan, amlodipine/perindopril, amlodipine/benazepril, gabapentin, bepridil, enalapril/felodipine, amlodipine/atorvastatin, nisoldipine, isradipine, felodipine, nitrendipine, amlodipine, nicardipine, nifedipine, pregabalin	781	12293	25399
CALCOCO1	calcium binding and coiled-coil domain 1	Q8CGU1	-1.513	1.69E-48	1.72E-45	1	Nucleus	transcription regulator			57658	67488	100912282|246047
CAMK2G	calcium/calmodulin-dependent protein kinase II gamma	Q923T9-2	1.508	8.32E-10	6.94E-08	5	Cytoplasm	kinase			818	12325	171140
CAMK2N1	calcium/calmodulin-dependent protein kinase II inhibitor 1	Q6QWF9	1.570	4.84E-07	2.44E-05	6	Plasma Membrane	kinase			55450	66259	287005
CASP2	caspase 2, apoptosis-related cysteine peptidase	--				4	Cytoplasm	peptidase			835	12366	64314
CASP8	caspase 8, apoptosis-related cysteine peptidase	--				4	Nucleus	peptidase	diagnosis,efficacy,prognosis		841	12370	64044
CCND1	cyclin D1	--				1	Nucleus	transcription regulator	diagnosis,efficacy,prognosis,response to therapy,unspecified application	arsenic trioxide/tretinoin, arsenic trioxide/daunorubicin/tretinoin, arsenic trioxide/gemtuzumab ozogamicin/tretinoin, arsenic trioxide/idarubicin/tretinoin, arsenic trioxide	595	12443	58919
CD9	CD9 molecule	P40240	1.101	6.85E-01	8.67E-01	1,3	Plasma Membrane	other	efficacy		928	12527	24936
CD53	CD53 molecule	--				1	Plasma Membrane	other			963	12508	24251
CD82	CD82 molecule	P40237	1.529	6.65E-02	2.62E-01	3	Plasma Membrane	other			3732	12521	83628
CD151	CD151 molecule (Raph blood group)	O35566	2.350	2.91E-04	5.93E-03	3	Plasma Membrane	other			977	12476	64315|100911730
CDKN1A	cyclin-dependent kinase inhibitor 1A (p21, Cip1)	--				5	Nucleus	kinase	diagnosis,efficacy,prognosis,response to therapy		1026	12575	114851
CNR1	cannabinoid receptor 1 (brain)	P47746	-1.504	2.24E-01	5.21E-01	2	Plasma Membrane	G-protein coupled receptor		trans-(±)-nabilone, SLV 319, rimonabant, BAY 38-7271, delta-8-tetrahydrocannabinol, delta-9-tetrahydrocannabinol	1268	12801	25248
CNTNAP1	contactin associated protein 1	O54991	-1.439	9.72E-04	1.54E-02	12	Plasma Membrane	other			8506	53321	84008
COMMD9	COMM domain containing 9	Q8K2Q0	1.683	1.39E-05	5.02E-04		Other	other			29099	76501	295956
CORO2B	coronin, actin binding protein, 2B	Q8BH44	-1.266	1.24E-07	6.91E-06	2	Other	other			10391	235431	300768
CPNE6	copine VI (neuronal)	Q9Z140	-1.598	5.15E-10	4.44E-08	3	Plasma Membrane	transporter			9362	12891	691478
CPSF1	cleavage and polyadenylation specific factor 1, 160kDa	Q9EPU4	-1.363	2.27E-05	7.63E-04		Nucleus	other			29894	94230	366952
CREB1	cAMP responsive element binding protein 1	P16220-3	1.169	7.16E-01	8.80E-01	1	Nucleus	transcription regulator			1385	12912	81646
CREBBP	CREB binding protein	P45481	-1.021	8.63E-01	9.52E-01	5	Nucleus	transcription regulator		PRI-724	1387	12914	54244
CRYAB	crystallin, alpha B	P23927	2.577	7.96E-07	3.71E-05	3	Nucleus	other	diagnosis,disease progression,prognosis,unspecified application		1410	12955	25420
CSF2RB	colony stimulating factor 2 receptor, beta, low-affinity (granulocyte-macrophage)	--				3	Plasma Membrane	transmembrane receptor		sargramostim, EPO/sargramostim, rituximab/sargramostim	1439	12983|12984	171081
CSRP1	cysteine and glycine-rich protein 1	P97315	2.019	9.39E-08	5.43E-06	1	Nucleus	other			1465	13007	29276
CTTN	cortactin	Q60598	-1.175	1.01E-01	3.27E-01	4	Plasma Membrane	other	efficacy		2017	13043	60465
CX3CL1	chemokine (C-X3-C motif) ligand 1	O35188	3.020	1.74E-01	4.48E-01	2,4	Extracellular Space	cytokine			6376	20312	89808
CYCS	cytochrome c, somatic	P62898	1.326	1.43E-01	4.01E-01	4	Cytoplasm	transporter			54205	13063	25309|100363502
DAGLA	diacylglycerol lipase, alpha	Q6WQJ1	-1.699	2.53E-06	1.10E-04	2	Plasma Membrane	enzyme			747	269060	309207
DBI	diazepam binding inhibitor (GABA receptor modulator, acyl-CoA binding protein)	P31786	-1.610	1.72E-07	9.31E-06	5	Cytoplasm	other			1622	13167	25045
DCTN1	dynactin 1	O08788	1.069	5.91E-01	8.15E-01	2,4	Cytoplasm	other			1639	13191	29167
DHPS	deoxyhypusine synthase	Q3TXU5	-1.779	5.84E-17	1.03E-14		Cytoplasm	enzyme	efficacy		1725	330817	288923
DLG4	discs, large homolog 4 (Drosophila)	Q62108-3	-1.342	5.83E-02	2.44E-01	2	Plasma Membrane	kinase	unspecified application		1742	13385	29495
DLGAP1	discs, large (Drosophila) homolog-associated protein 1	--				2	Plasma Membrane	other			9229	224997	65040
DOCK4	dedicator of cytokinesis 4	P59764	-1.677	4.32E-06	1.77E-04		Plasma Membrane	other			9732	238130
DOCK10	dedicator of cytokinesis 10	Q8BZN6	-2.353	3.09E-19	8.24E-17	10	Cytoplasm	other			55619	210293	301556
dopamine	--	--				2	Other	chemical - endogenous mammalian
DUSP14	dual specificity phosphatase 14	Q9JLY7	2.075	1.33E-05	4.83E-04	3	Other	phosphatase			11072	56405	365977|360580
E2F1	E2F transcription factor 1	--				5	Nucleus	transcription regulator	disease progression,prognosis		1869	13555	399489
EBF1	early B-cell factor 1	--					Nucleus	transcription regulator			1879	13591	116543
EGF	epidermal growth factor	--				5	Extracellular Space	growth factor	diagnosis,efficacy,response to therapy,unspecified application		1950	13645	25313
EHBP1	EH domain binding protein 1	Q69ZW3-2	-1.480	4.30E-11	4.38E-09	1	Cytoplasm	other			23301	216565	305556
EHD4	EH-domain containing 4	Q9EQP2	-1.651	2.62E-05	8.65E-04	1	Plasma Membrane	enzyme			30844	98878	192204
EOMES	eomesodermin	--				3	Nucleus	transcription regulator			8320	13813	316052
EP400	E1A binding protein p400	Q8CHI8-3	-1.304	1.37E-07	7.50E-06		Nucleus	other			57634	75560	304569
ERG	v-ets avian erythroblastosis virus E26 oncogene homolog	--				10	Nucleus	transcription regulator	prognosis		2078	13876	170909
ETS2	v-ets avian erythroblastosis virus E26 oncogene homolog 2	--					Nucleus	transcription regulator	efficacy		2114	23872	304063
EXOC1	exocyst complex component 1	Q8R3S6	-1.374	3.12E-07	1.62E-05	3	Cytoplasm	transporter			55763	69940
EXOC2	exocyst complex component 2	Q9D4H1	-1.107	7.22E-01	8.83E-01	3	Cytoplasm	transporter			55770	66482	171455
EXOC3	exocyst complex component 3	Q6KAR6	1.056	4.14E-01	6.94E-01	3	Plasma Membrane	transporter			11336	211446	252881
EXOC4	exocyst complex component 4	O35382	-1.094	4.22E-01	7.00E-01	3	Cytoplasm	transporter			60412	20336	116654
EXOC6	exocyst complex component 6	Q8R313	1.022	9.15E-01	9.73E-01	3	Plasma Membrane	transporter			54536	107371	50556
EXOC8	exocyst complex component 8	Q6PGF7	1.251	1.26E-02	9.85E-02	3	Plasma Membrane	other			149371	102058	245709
FAS	Fas cell surface death receptor	--				4	Plasma Membrane	transmembrane receptor	diagnosis,disease progression,efficacy		355	14102	246097
FES	FES proto-oncogene, tyrosine kinase	--				3	Cytoplasm	kinase			2242	14159	361597
FMR1	fragile X mental retardation 1	P35922-9	1.206	3.21E-02	1.72E-01	8	Nucleus	other			2332	14265	24948
FSCN1	fascin actin-bundling protein 1	Q61553	1.033	7.71E-01	9.08E-01	2	Cytoplasm	other	unspecified application		6624	14086	683788
GABRG2	gamma-aminobutyric acid (GABA) A receptor, gamma 2	P22723-2	1.186	6.58E-01	8.50E-01	2	Plasma Membrane	ion channel		pagoclone, alphadolone, SEP 174559, clobazam, nitrazepam, tracazolate, adinazolam, sevoflurane, isoflurane, gaboxadol, isoniazid, felbamate, etomidate, muscimol, halothane, fluoxetine/olanzapine, estazolam, clorazepate, eszopiclone, quazepam, amitriptyline/chlordiazepoxide, diazepam, temazepam, zolpidem, chlordiazepoxide, lorazepam, olanzapine, triazolam, flumazenil, clonazepam, flurazepam, midaz…	2566	14406	29709
GAMT	guanidinoacetate N-methyltransferase	O35969	2.076	9.48E-09	6.42E-07		Cytoplasm	enzyme			2593	14431	25257
GATA3	GATA binding protein 3	--					Nucleus	transcription regulator	diagnosis		2625	14462	85471
GFPT1	glutamine--fructose-6-phosphate transaminase 1	P47856-2	-1.527	1.50E-09	1.17E-07		Cytoplasm	enzyme			2673	14583	297417
GHR	growth hormone receptor	--				1	Plasma Membrane	transmembrane receptor		GH1, prednisone/somatotropin, pegvisomant, somatrem	2690	14600	25235
GM2A	GM2 ganglioside activator	Q60648	1.427	1.40E-11	1.58E-09	5	Cytoplasm	enzyme			2760	14667	282838
GPX3	glutathione peroxidase 3	P46412	4.745	1.40E-09	1.12E-07	4	Extracellular Space	enzyme	unspecified application		2878	14778	64317
GRIA2	glutamate receptor, ionotropic, AMPA 2	P23819-4	-1.292	6.09E-02	2.49E-01	2	Plasma Membrane	ion channel		talampanel, farampator, LY451395, tezampanel	2891	14800	29627
GRM3	glutamate receptor, metabotropic 3	Q9QYS2	-1.353	5.79E-03	5.73E-02	4	Plasma Membrane	G-protein coupled receptor		fasoracetam	2913	108069	24416
GRM5	glutamate receptor, metabotropic 5	Q3UVX5	-1.768	2.23E-04	4.96E-03		Plasma Membrane	G-protein coupled receptor		fasoracetam, acamprosate	2915	108071	24418
HAP1	huntingtin-associated protein 1	O35668-2	-5.385	5.42E-06	2.15E-04	2	Cytoplasm	other			9001	15114	29430
HGF	hepatocyte growth factor (hepapoietin A; scatter factor)	--				3	Extracellular Space	growth factor	diagnosis,disease progression,efficacy,prognosis,unspecified application	rilotumumab, MP0250	3082	15234	24446
HIPK2	homeodomain interacting protein kinase 2	--					Nucleus	kinase			28996	15258	362342
HLA-E	major histocompatibility complex, class I, E	--				4	Plasma Membrane	transmembrane receptor	prognosis		3133	667803|15040	294228
HMGCS2	3-hydroxy-3-methylglutaryl-CoA synthase 2 (mitochondrial)	P54869	-1.904	9.69E-07	4.44E-05	7	Cytoplasm	enzyme	unspecified application		3158	15360	24450
HOMER1	homer scaffolding protein 1	Q9Z2Y3	-1.050	7.07E-01	8.78E-01	2	Plasma Membrane	other			9456	26556	29546
HP	haptoglobin	Q61646	-3.997	2.04E-25	9.45E-23	3	Extracellular Space	peptidase	diagnosis,efficacy,unspecified application		3240	15439	24464
HP1BP3	heterochromatin protein 1, binding protein 3	Q3TEA8-3	-2.013	2.07E-05	7.06E-04		Nucleus	other			50809	15441	313647
HRAS	Harvey rat sarcoma viral oncogene homolog	Q61411	1.335	6.08E-02	2.49E-01	4	Plasma Membrane	enzyme	prognosis,safety		3265	15461	293621
Hrk	harakiri, BCL2 interacting protein (contains only BH3 domain)	--				3	Cytoplasm	other				12123	117271
HTT	huntingtin	P42858	-1.930	2.97E-02	1.66E-01	4	Cytoplasm	transcription regulator	unspecified application		3064	15194	29424
ICAM1	intercellular adhesion molecule 1	--				4	Plasma Membrane	transmembrane receptor	diagnosis,efficacy,prognosis,unspecified application		3383	15894	25464
Il3	interleukin 3	--					Extracellular Space	cytokine				16187	24495
IL1B	interleukin 1, beta	--				4	Extracellular Space	cytokine	diagnosis,efficacy,prognosis	canakinumab, gevokizumab, canakinumab/INS, gallium nitrate	3553	16176	24494
IL6ST	interleukin 6 signal transducer	--				3	Plasma Membrane	transmembrane receptor	unspecified application		3572	16195	25205
Ins1	insulin I	--				1	Extracellular Space	other				16333	24505
iron	--	--				3,4	Other	chemical - endogenous mammalian	safety
ITIH3	inter-alpha-trypsin inhibitor heavy chain 3	Q61704	-2.173	1.02E-05	3.81E-04	2	Extracellular Space	other			3699	16426	50693
ITPR1	inositol 1,4,5-trisphosphate receptor, type 1	P11881	-1.290	2.60E-02	1.51E-01	2	Cytoplasm	ion channel			3708	16438	25262
JAK1	Janus kinase 1	--					Cytoplasm	kinase	efficacy	tofacitinib, ruxolitinib, momelotinib, INCB039110, INCB052793	3716	16451	84598
JAK2	Janus kinase 2	--					Cytoplasm	kinase	efficacy,prognosis	tofacitinib, pacritinib, ruxolitinib, momelotinib, NS-018, SB-1317, BMS-911543	3717	16452	24514
KIF5A	kinesin family member 5A	P33175	-1.335	1.65E-02	1.15E-01	2	Cytoplasm	transporter			3798	16572	314906
KL	klotho	--					Extracellular Space	enzyme			9365	16591	83504
L-dopa	--	--				2	Other	chemical - endogenous mammalian
L-glutamic acid	--	--					Other	chemical - endogenous mammalian	efficacy,response to therapy
LAMP2	lysosomal-associated membrane protein 2	P17047-3	1.115	7.65E-01	9.05E-01	2	Plasma Membrane	enzyme			3920	16784	24944
LGALS1	lectin, galactoside-binding, soluble, 1	P16045	1.768	8.83E-08	5.16E-06	2	Extracellular Space	other	diagnosis,prognosis		3956	16852	56646
LIAS	lipoic acid synthetase	Q99M04	6.968	4.82E-09	3.41E-07		Cytoplasm	enzyme			11019	79464	305348
LPAR1	lysophosphatidic acid receptor 1	--					Plasma Membrane	G-protein coupled receptor			1902	14745	116744
LRP1	low density lipoprotein receptor-related protein 1	Q91ZX7	-1.292	7.77E-02	2.85E-01	1	Plasma Membrane	transmembrane receptor		paclitaxel-angiopep-2 conjugate	4035	16971	299858
LRRC8A	leucine rich repeat containing 8 family, member A	Q80WG5	-1.902	1.33E-06	6.01E-05	1	Extracellular Space	other			56262	241296	311846
LRSAM1	leucine rich repeat and sterile alpha motif containing 1	Q80ZI6	-1.324	3.18E-08	1.95E-06		Cytoplasm	enzyme			90678	227738	311866
LZTS3	leucine zipper, putative tumor suppressor family member 3	A2AHG0	-1.115	3.23E-01	6.20E-01	2	Cytoplasm	other			9762	241638	280670
MAP2	microtubule-associated protein 2	P20357	-1.142	1.50E-01	4.11E-01		Plasma Membrane	other		estramustine	4133	17756	25595
MAP1S	microtubule-associated protein 1S	Q8C052	-1.031	6.93E-01	8.72E-01		Cytoplasm	enzyme			55201	270058	290640
MAPK3	mitogen-activated protein kinase 3	Q63844	-1.084	5.79E-01	8.06E-01	4	Cytoplasm	kinase	efficacy	BVD-523	5595	26417	50689
MAPK9	mitogen-activated protein kinase 9	Q9WTU6	1.556	6.01E-02	2.47E-01	1	Cytoplasm	kinase			5601	26420	50658
Mbp	myelin basic protein	--				12	Extracellular Space	other					24547
MEF2D	myocyte enhancer factor 2D	--				4	Nucleus	transcription regulator			4209	17261	81518
MICALL1	MICAL-like 1	Q8BGT6	4.460	1.77E-05	6.21E-04		Cytoplasm	other	unspecified application		85377	27008	362958
MIF	macrophage migration inhibitory factor (glycosylation-inhibiting factor)	P34884	1.247	2.81E-01	5.89E-01	4	Extracellular Space	cytokine	diagnosis,prognosis,response to therapy		4282	17319	81683
MPP6	membrane protein, palmitoylated 6 (MAGUK p55 subfamily member 6)	Q9JLB0-2	-1.520	1.33E-17	2.60E-15	2	Plasma Membrane	kinase			51678	56524	362359
MRPL50	mitochondrial ribosomal protein L50	Q8VDT9	2.045	5.73E-07	2.80E-05		Cytoplasm	other			54534	28028	362517
MTOR	mechanistic target of rapamycin (serine/threonine kinase)	Q9JLN9	-1.334	4.38E-04	8.16E-03	7	Nucleus	kinase	efficacy	ridaforolimus, OSI-027, methotrexate/sirolimus/tacrolimus, dactolisib, AZD2014, apitolisib, PKI-179, everolimus/exemestane, lenalidomide/temsirolimus, cc-223, PF-05212384, imatinib/sirolimus, cyclophosphamide/sirolimus, P7170, cyclosporine A/sirolimus/tacrolimus, everolimus/pasireotide, mTOR inhibitor, PWT33597, PQR309, VS-5584, sirolimus, temsirolimus, tacrolimus, everolimus, pimecrolimus	2475	56717	56718
MYC	v-myc avian myelocytomatosis viral oncogene homolog	--				1,3,4,5	Nucleus	transcription regulator	diagnosis,efficacy,prognosis,response to therapy,unspecified application		4609	17869	24577
MYL6B	myosin, light chain 6B, alkali, smooth muscle and non-muscle	Q8CI43	1.426	4.35E-09	3.11E-07		Cytoplasm	other			140465	216459	317454
MYO1B	myosin IB	P46735-2	-3.130	1.11E-15	1.68E-13	1	Cytoplasm	other			4430	17912	117057
NCAM1	neural cell adhesion molecule 1	P13595	-1.047	7.11E-01	8.78E-01	3	Plasma Membrane	other	efficacy,prognosis	BB-10901	4684	17967	24586
NCF1	neutrophil cytosolic factor 1	--				3	Cytoplasm	enzyme	efficacy		653361	17969	114553
NLGN1	neuroligin 1	--				2	Plasma Membrane	enzyme			22871	192167	116647
Nrg1	neuregulin 1	--					Plasma Membrane	other				211323
NRP1	neuropilin 1	--				3	Plasma Membrane	transmembrane receptor	diagnosis,efficacy		8829	18186	246331
OXTR	oxytocin receptor	--				1	Plasma Membrane	G-protein coupled receptor		TT-235, OXT, carbetocin	5021	18430	25342
PAX3	paired box 3	--					Nucleus	transcription regulator			5077	18505	114502
PENK	proenkephalin	P22005	1.738	3.06E-02	1.67E-01		Extracellular Space	other			5179	18619	29237
PLEKHB1	pleckstrin homology domain containing, family B (evectins) member 1	Q9QYE9-4	2.653	1.10E-06	5.00E-05		Cytoplasm	other			58473	27276	64471
PLK2	polo-like kinase 2	--				2	Nucleus	kinase			10769	20620	83722
PLXNA1	plexin A1	P70206	-1.738	1.21E-17	2.46E-15	3	Plasma Membrane	transmembrane receptor			5361	18844	362398
PLXNA2	plexin A2	P70207	-1.527	1.94E-09	1.47E-07	1	Plasma Membrane	transmembrane receptor			5362	18845	289392
PLXNA4	plexin A4	Q80UG2	-1.746	1.98E-11	2.18E-09	3	Plasma Membrane	transmembrane receptor			91584	243743	312213
PLXNC1	plexin C1	Q9QZC2	-3.310	5.81E-06	2.29E-04	1	Plasma Membrane	transmembrane receptor			10154	54712	362873
PML	promyelocytic leukemia	Q60953-2	-1.364	6.73E-01	8.59E-01	5	Nucleus	transcription regulator		arsenic trioxide	5371	18854	315713
PNCK	pregnancy up-regulated nonubiquitous CaM kinase	Q9QYK9	-1.986	1.52E-05	5.42E-04		Other	kinase			139728	93843	29660
PPP1R14A	protein phosphatase 1, regulatory (inhibitor) subunit 14A	Q91VC7	2.046	2.19E-07	1.15E-05		Cytoplasm	phosphatase			94274	68458	114004
PPP3CA	protein phosphatase 3, catalytic subunit, alpha isozyme	P63328	-1.033	7.02E-01	8.77E-01	3	Cytoplasm	phosphatase		voclosporin, tacrolimus, pimecrolimus, cyclosporin A	5530	19055	24674
PREPL	prolyl endopeptidase-like	Q8C167-2	-1.264	2.95E-05	9.63E-04		Other	peptidase			9581	213760	298771
PRKAR2B	protein kinase, cAMP-dependent, regulatory, type II, beta	P31324	-1.328	3.02E-06	1.28E-04	1	Cytoplasm	kinase			5577	19088	24679
PRKCA	protein kinase C, alpha	P20444	-1.307	2.34E-06	1.03E-04	1	Cytoplasm	kinase		L-threo-safingol, ingenol mebutate	5578	18750	24680
PRKCB	protein kinase C, beta	P68404-2	-1.568	8.14E-23	2.59E-20	3	Cytoplasm	kinase	diagnosis,efficacy,unspecified application	sotrastaurin, enzastaurin, ruboxistaurin, ingenol mebutate	5579	18751	25023
PRKCG	protein kinase C, gamma	P63318	-1.490	6.87E-09	4.79E-07	1	Cytoplasm	kinase		ingenol mebutate	5582	18752	24681
PRMT5	protein arginine methyltransferase 5	Q8CIG8	-1.145	3.12E-01	6.13E-01	9	Cytoplasm	enzyme			10419	27374	364382
PRRC2C	proline-rich coiled-coil 2C	Q3TLH4-5	-1.288	6.90E-08	4.08E-06		Other	other			23215	226562
PTPDC1	protein tyrosine phosphatase domain containing 1	Q6NZK8-2	-3.799	9.89E-10	8.12E-08		Extracellular Space	phosphatase			138639	218232	291022
PTPN9	protein tyrosine phosphatase, non-receptor type 9	O35239	-1.287	5.38E-06	2.15E-04	2	Cytoplasm	phosphatase			5780	56294	266611
RAD23B	RAD23 homolog B, nucleotide excision repair protein	P54728	1.298	2.16E-05	7.32E-04	1	Nucleus	other			5887	19359	298012
RBL1	retinoblastoma-like 1	--				5	Nucleus	transcription regulator			5933	19650	680111
RBL2	retinoblastoma-like 2	--				5	Nucleus	other			5934	19651	81758
RGS14	regulator of G-protein signaling 14	P97492	-2.647	3.04E-08	1.92E-06	4	Cytoplasm	other			10636	51791	114705
RHOA	ras homolog family member A	Q9QUI0	1.509	2.77E-04	5.80E-03	5	Cytoplasm	enzyme			387	11848	117273
RHOG	ras homolog family member G	P84096	1.752	2.19E-10	2.06E-08	4	Cytoplasm	enzyme			391	56212	308875
RICTOR	RPTOR independent companion of MTOR, complex 2	Q6QI06	-1.685	3.15E-03	3.68E-02	1	Cytoplasm	other			253260	78757	310131
RIMS1	regulating synaptic membrane exocytosis 1	Q99NE5-7	1.315	6.40E-01	8.41E-01	11	Plasma Membrane	other			22999	116837	84556
RNF181	ring finger protein 181	Q9CY62	1.779	3.96E-09	2.88E-07		Other	enzyme			51255	66510	297337
RNF185	ring finger protein 185	Q91YT2	1.675	4.51E-06	1.84E-04		Cytoplasm	other			91445	193670	360967
RPL18	ribosomal protein L18	P35980	-2.253	7.57E-12	8.75E-10		Cytoplasm	other			6141	19899	81766
RPS6KB1	ribosomal protein S6 kinase, 70kDa, polypeptide 1	--					Cytoplasm	kinase	diagnosis,efficacy,prognosis		6198	72508	83840
RPS6KB2	ribosomal protein S6 kinase, 70kDa, polypeptide 2	--				1	Cytoplasm	kinase			6199	58988	361696
RYR1	ryanodine receptor 1 (skeletal)	E9PZQ0	-1.370	3.96E-01	6.80E-01	2	Cytoplasm	ion channel		dantrolene	6261	20190	114207
SCN9A	sodium channel, voltage gated, type IX alpha subunit	Q62205	-1.519	3.06E-08	1.92E-06	2	Plasma Membrane	ion channel		bupivacaine/lidocaine, epinephrine/lidocaine, lidocaine, riluzole, zonisamide	6335	20274	78956
SCPEP1	serine carboxypeptidase 1	Q920A5	1.565	6.90E-06	2.68E-04		Cytoplasm	peptidase			59342	74617	114861
SDC4	syndecan 4	O35988	1.040	8.97E-01	9.67E-01	3	Plasma Membrane	other			6385	20971	24771
SEPT4	septin 4	P28661-2	1.450	2.35E-05	7.88E-04	1	Cytoplasm	enzyme			5414	18952
SERPINC1	serpin peptidase inhibitor, clade C (antithrombin), member 1	P32261	5.965	3.37E-10	3.12E-08	4	Extracellular Space	enzyme	diagnosis,unspecified application	dalteparin, heparin, enoxaparin, ardeparin, SR-123781A, glucuronyl glucosamine glycan sulfate, fondaparinux, nadroparin	462	11905	304917
SERPINF2	serpin peptidase inhibitor, clade F (alpha-2 antiplasmin, pigment epithelium derived factor), member 2	Q61247	2.839	4.63E-07	2.36E-05	4	Extracellular Space	other			5345	18816	287527
SHANK3	SH3 and multiple ankyrin repeat domains 3	Q4ACU6	-1.509	6.81E-07	3.21E-05	2	Plasma Membrane	other			85358	58234	59312
SHH	sonic hedgehog	--				1	Extracellular Space	peptidase	diagnosis,efficacy,response to therapy,unspecified application		6469	20423	29499
SIPA1L1	signal-induced proliferation-associated 1 like 1	Q8C0T5	-1.609	1.17E-07	6.68E-06	2	Cytoplasm	other			26037	217692	246212
SIRPA	signal-regulatory protein alpha	P97797-2	-1.232	1.55E-01	4.18E-01	1	Plasma Membrane	phosphatase			140885	19261	25528
SLC1A3	solute carrier family 1 (glial high affinity glutamate transporter), member 3	P56564	-2.023	4.00E-10	3.64E-08	4	Plasma Membrane	transporter		riluzole	6507	20512	29483
SLIT2	slit guidance ligand 2	--					Extracellular Space	other	diagnosis		9353	20563	360272
SMAD3	SMAD family member 3	--				5	Nucleus	transcription regulator			4088	17127	25631
SMAD4	SMAD family member 4	P97471	-1.082	9.01E-01	9.68E-01	5	Nucleus	transcription regulator	prognosis		4089	17128	50554
SNCA	synuclein, alpha (non A4 component of amyloid precursor)	O55042-2	1.135	7.67E-01	9.06E-01	4	Cytoplasm	other	diagnosis,disease progression,prognosis		6622	20617	29219
SNRPD1	small nuclear ribonucleoprotein D1 polypeptide 16kDa	P62315	1.580	1.51E-05	5.41E-04	9	Nucleus	other			6632	20641	291794
SOD1	superoxide dismutase 1, soluble	P08228	1.253	2.07E-01	4.99E-01		Cytoplasm	enzyme	unspecified application		6647	20655	24786
STAT3	signal transducer and activator of transcription 3 (acute-phase response factor)	P42227-2	-1.221	2.66E-01	5.71E-01		Nucleus	transcription regulator	diagnosis,efficacy,prognosis,response to therapy		6774	20848	25125
STAT5B	signal transducer and activator of transcription 5B	P42232	-1.625	3.01E-06	1.28E-04	1	Nucleus	transcription regulator	response to therapy		6777	20851	25126
STMN1	stathmin 1	P54227	2.001	1.42E-02	1.05E-01	1,4	Cytoplasm	other	efficacy		3925	16765	29332
STXBP3	syntaxin binding protein 3	Q60770-2	1.111	8.43E-01	9.41E-01	1	Plasma Membrane	transporter			6814	20912	114095
STXBP5L	syntaxin binding protein 5-like	Q5DQR4	-1.339	6.65E-14	8.90E-12		Cytoplasm	other			9515	207227	288080
SULT4A1	sulfotransferase family 4A, member 1	P63046	1.356	4.99E-07	2.47E-05		Cytoplasm	enzyme	efficacy		25830	29859	58953
SYNGAP1	synaptic Ras GTPase activating protein 1	F6SEU4	1.011	9.47E-01	9.87E-01	2	Plasma Membrane	other			8831	240057	192117
TAZ	tafazzin	--				6	Nucleus	enzyme			6901	66826	363521
TENM2	teneurin transmembrane protein 2	Q9WTS5	-1.990	8.16E-06	3.10E-04	4	Plasma Membrane	other			57451	23964	117242
TF	transferrin	Q921I1	2.049	7.51E-20	2.12E-17	3	Extracellular Space	transporter	efficacy,prognosis	ferric carboxymaltose	7018	22041	24825
TLE4	transducin-like enhancer of split 4	Q62441	10296483346.115	0.00E00	0.00E00	5	Nucleus	transcription regulator			7091	21888	25565
TNF	tumor necrosis factor	--				5	Extracellular Space	cytokine	diagnosis,disease progression,efficacy,prognosis,response to therapy,safety,unspecified application	adalimumab, etanercept, infliximab, certolizumab, golimumab, infliximab/methotrexate, dexamethasone/thalidomide, dexamethasone/pomalidomide, cyclophosphamide/dexamethasone/thalidomide, golimumab/methotrexate, bortezomib/dexamethasone/thalidomide, rituximab/thalidomide, bortezomib/thalidomide, prednisone/thalidomide, adalimumab/methotrexate, pomalidomide, thalidomide	7124	21926	24835
TNR	tenascin R	Q8BYI9	-1.072	4.10E-01	6.90E-01		Plasma Membrane	other			7143	21960	25567
TP53	tumor protein p53	--				4,5	Nucleus	transcription regulator	diagnosis,disease progression,efficacy,prognosis,response to therapy,unspecified application	CGM097, kevetrin	7157	22059	24842
TP53I11	tumor protein p53 inducible protein 11	Q4QQM4	2.898	1.81E-05	6.32E-04	4	Other	other			9537	277414	311209
TPT1	tumor protein, translationally-controlled 1	P63028	1.343	3.68E-01	6.57E-01	1	Cytoplasm	other			7178	22070	116646
TRIM32	tripartite motif containing 32	Q8CH72	43443686634.987	0.00E00	0.00E00	2	Nucleus	transcription regulator			22954	69807	313264
TTR	transthyretin	P07309	4.582	1.69E-47	1.43E-44	3	Extracellular Space	transporter	diagnosis,efficacy,prognosis,unspecified application		7276	22139	24856
UBA6	ubiquitin-like modifier activating enzyme 6	Q8C7R4	-1.155	3.36E-01	6.27E-01		Cytoplasm	enzyme			55236	231380	305268
UGT8	UDP glycosyltransferase 8	Q64676	1.552	2.72E-05	8.91E-04	12	Cytoplasm	enzyme			7368	22239	50555
UNC13A	unc-13 homolog A (C. elegans)	Q4KUS2	-1.980	3.15E-08	1.95E-06	11	Plasma Membrane	other			23025	382018	64829
USP24	ubiquitin specific peptidase 24	B1AY13	-1.593	4.39E-10	3.85E-08		Other	peptidase			23358	329908	313427
WFS1	Wolfram syndrome 1 (wolframin)	P56695	-2.482	6.27E-13	7.78E-11		Cytoplasm	enzyme	diagnosis		7466	22393	83725
YY1	YY1 transcription factor	--				5	Nucleus	transcription regulator			7528	22632	24919
ZNF423	zinc finger protein 423	--					Nucleus	transcription regulator			23090	94187	94188

## Sheet: CPs
© 2000-2015 QIAGEN. All rights reserved.
Ingenuity Canonical Pathways	-log(p-value)	Ratio	z-score	Downregulated	No change	Upregulated	No overlap with dataset	Molecules
Synaptic Long Term Potentiation	4.65E00	6.93E-02	-1.633	45/101 (45%)	0/101 (0%)	26/101 (26%)	30/101 (30%)	CAMK2B,ITPR2,GRM2,PLCD4,GNA11,PRKAR2B,MRAS,CHP1,PRKAG2,MAP2K1,PRKACB,RAP1A,GRM3,ADCY1,GNAQ,PPP1R1A,PRKCB,ITPR1,PRKAR1B,GRM1,PRKAR2A,PRKCE,PRKAR1A,PRKCD,NRAS,PPP3R1,CAMK2G,RAP1B,PPP1CB,PDIA3,PRKAG1,Ppp1cc,PPP1R14A,CREB1,PPP1R7,CAMK2D,GRIN1,GRIA3,GRIA2,GRM7,PLCB3,CREBBP,PRKCI,GRM5,PRKCZ,MAPK3,PLCB1,KRAS,RRAS2,GRIA1,PPP1R12A,PPP1CA,PPP3CB,CAMK4,PPP3CA,CAMK2A,GRIN2B,PPP1R14C,ITPR3,PRKCA,MAP2K2,MAPK1,…
Protein Kinase A Signaling	4.42E00	3.73E-02	-1.000	110/295 (37%)	0/295 (0%)	56/295 (19%)	129/295 (44%)	CAMK2B,GNA13,ADD1,DUSP3,PRKAR2B,GNB1,SMAD4,ADD2,RAP1A,ADCY1,ANAPC5,RYR3,GNAQ,RYR1,PRKCB,ITPR1,PRKAR1B,AKAP1,CDC27,PRKAR2A,PRKCE,PDE12,Ptprd,ANAPC2,MYL4,YWHAG,CTNNB1,MYL6B,MYL9,PTK2,ADD3,GNB2,ANAPC10,PRKAR1A,PRKCD,ACP1,PTK2B,PTPN12,ENPP6,GNB5,CAMK2G,MYLK,RAP1B,PRKAG1,YWHAZ,H1F0,FLNB,Ppp1cc,GNAI1,PYGM,TDP2,PHKA2,AKAP10,GNB4,ANAPC4,CREB1,PDE4A,DUSP15,HIST1H1D,AKAP12,PYGB,PTPN11,PDE7B,PLCB3,PTPN5,CRE…
Melatonin Signaling	3.83E00	8.33E-02	-2.236	32/60 (53%)	0/60 (0%)	10/60 (17%)	18/60 (30%)	CAMK2B,GNAI1,MAP2K5,MAP2K7,PLCD4,PRKAR2B,GNAO1,CAMK2D,PRKAG2,MAP2K1,PRKACB,GNAI3,GNAQ,GNAI2,PLCB3,PRKCB,PRKAR1B,PRKCI,PRKCZ,MAPK3,PRKAR2A,PRKCE,PLCB1,CAMK4,CAMK2A,PRKAR1A,PRKCD,BRAF,PRKCA,MAP2K4,CAMK2G,MAP2K2,MAPK1,PLCH2,PDIA3,PRKD1,PLCL2,ARAF,PRKAG1,PRKACA,MAP2K6,PRKCG
Dopamine-DARPP32 Feedback in cAMP Signaling	3.78E00	5.07E-02	-2.646	49/138 (36%)	0/138 (0%)	24/138 (17%)	65/138 (47%)	PPP2R5E,ITPR2,PLCD4,PRKAR2B,GUCY1B3,PPP2R4,CHP1,GUCY1A3,PRKAG2,PRKACB,GNAI3,ADCY1,CSNK1D,GNAQ,ADCY3,PPP2R5A,PPP2CB,PRKCB,ITPR1,PRKAR1B,PPP1R1B,PRKAR2A,CSNK1E,PRKCE,CACNA1E,ATP2A2,PPP2R2C,CAMKK1,CDK5,PRKAR1A,PRKCD,PPP3R1,PPP1CB,PDIA3,PRKAG1,Ppp1cc,GNAI1,CSNK1A1,PPP1R14A,CREB1,PPP1R7,GRIN1,DRD1,GNAI2,NOS1,PPP2R1A,PLCB3,CREBBP,ADCY2,PRKCI,CAMKK2,PRKCZ,PPP2CA,PLCB1,ADCY5,PPP1R12A,PPP1CA,PPP3CB,CAMK4,…
GPCR-Mediated Nutrient Sensing in Enteroendocrine Cells	3.51E00	7.14E-02	NaN	36/70 (51%)	0/70 (0%)	7/70 (10%)	27/70 (39%)	GNAI1,PLCD4,ITPR2,GNA11,PRKAR2B,GNG7,PRKAG2,PRKACB,GNAI3,ADCY1,GNAQ,GNAI2,ADCY3,GNG3,GNG4,PLCB3,PRKCB,PRKAR1B,ADCY2,ITPR1,PRKCI,PRKCZ,PRKAR2A,PLCB1,PRKCE,RAPGEF4,ADCY5,PRKAR1A,PRKCD,GNG5,GNAS,PRKCA,ITPR3,PLCH2,GNG12,PDIA3,PRKD1,GNG2,PLCL2,PRKAG1,PRKACA,ADCY9,PRKCG
Thrombin Signaling	3.39E00	4.37E-02	0.378	61/160 (38%)	0/160 (0%)	39/160 (24%)	60/160 (38%)	CAMK2B,GNA13,GNA11,GNB1,PIK3CB,GNAL,ADCY1,GNAQ,PRKCB,ITPR1,RHOT1,PRKCE,GNAZ,MYL4,SRC,MYL6B,MYL9,CAMK1D,PTK2,GNB2,PRKCD,NRAS,GNB5,CAMK2G,MYLK,ARHGEF9,GNAI1,GNB4,CREB1,GNAO1,ARHGEF12,RHOC,PLCB3,ADCY2,ROCK1,PRKCI,PRKCZ,FNBP1,GNB2L1,ADCY5,MYL12A,CAMK4,SOS1,CAMK2A,RHOG,ITPR3,PRKCA,CAMK1,ARHGEF1,MAP2K2,PLCH2,PRKD1,GNG2,HRAS,RRAS,ADCY9,PRKCG,ITPR2,PLCD4,MRAS,GNG7,MAP2K1,ROCK2,GNAI3,MPRIP,ADCY3,GNG4,PIK3…
GNRH Signaling	3.35E00	5.17E-02	-1.633	50/116 (43%)	0/116 (0%)	25/116 (22%)	41/116 (35%)	CAMK2B,SOS2,ITPR2,CDC42,GNA11,PRKAR2B,MRAS,MAPK10,MAP3K10,PRKAG2,MAP2K1,DNM1,PRKACB,GNAI3,PAK3,ADCY1,GNAQ,ADCY3,PRKCB,ITPR1,PRKAR1B,MAPK9,PRKAR2A,PRKCE,EGFR,SRC,PTK2,PRKAR1A,PRKCD,NRAS,DNM2,CAMK2G,MAP3K4,PRKAG1,MAP2K6,GNAI1,MAP2K7,MAPK14,CREB1,CAMK2D,DNM1L,GNAI2,PLCB3,GRB2,CREBBP,ADCY2,MAPK8,PRKCI,PRKCZ,MAPK3,Map3k7,PLCB1,KRAS,PAK2,MAP3K5,RRAS2,ADCY5,PAK1,SOS1,CAMK2A,RELA,GNAS,ITPR3,PRKCA,MAP2K4,…
α-Adrenergic Signaling	3.27E00	6.33E-02	-1.342	45/79 (57%)	0/79 (0%)	13/79 (16%)	21/79 (27%)	ITPR2,PRKAR2B,MRAS,GNG7,GNB1,PRKAG2,MAP2K1,PRKACB,GNAI3,ADCY1,GNAQ,ADCY3,GNG4,PRKCB,ITPR1,PRKAR1B,PRKAR2A,PRKCE,GNB2,PRKAR1A,PRKCD,NRAS,GNB5,GYS1,GNG12,PRKAG1,GNAI1,PYGM,PHKA2,GNB4,SLC8A1,GNAI2,PYGB,GNG3,PHKB,ADCY2,PRKCI,PRKCZ,MAPK3,KRAS,PYGL,RRAS2,GNB2L1,ADCY5,CAMK4,GNG5,GNAS,ITPR3,PRKCA,MAP2K2,MAPK1,PRKD1,GNG2,PRKACA,HRAS,RRAS,ADCY9,PRKCG
Breast Cancer Regulation by Stathmin1	3.23E00	4.12E-02	NaN	67/170 (39%)	1/170 (1%)	41/170 (24%)	61/170 (36%)	CAMK2B,PPP2R5E,SOS2,GNA13,PRKAR2B,PPP2R4,GNB1,PIK3CB,ADCY1,GNAQ,TUBA1A,PPP2R5A,PRKCB,ITPR1,PRKAR1B,PRKAR2A,PRKCE,CAMK1D,GNB2,PRKAR1A,PRKCD,NRAS,GNB5,CAMK2G,TUBA4A,ARHGEF9,PRKAG1,GNAI1,GNB4,TUBA8,ARHGEF12,TUBB2A,ARHGEF17,ARHGEF7,PLCB3,ADCY2,ROCK1,PRKCI,PRKCZ,PPP2CA,TSG101,GNB2L1,ADCY5,PAK1,CAMK4,PPP2R2A,SOS1,CAMK2A,ITPR3,PRKCA,CAMK1,ARHGEF1,MAP2K2,PRKD1,GNG2,PRKACA,HRAS,RRAS,RAC1,ADCY9,PRKCG,ITPR2…
Thrombopoietin Signaling	3.19E00	8.51E-02	-2.000	19/47 (40%)	0/47 (0%)	12/47 (26%)	16/47 (34%)	MRAS,PIK3R1,MAP2K1,PIK3CB,STAT3,PIK3CA,STAT1,PTPN11,GRB2,PRKCB,PRKCI,PRKCZ,PIK3C3,MAPK3,PRKCE,KRAS,IRS2,RRAS2,SOS1,NRAS,PRKCD,GAB2,PRKCA,PIK3R2,MAP2K2,MAPK1,PRKD1,STAT5B,HRAS,RRAS,PRKCG
Neuropathic Pain Signaling In Dorsal Horn Neurons	3.08E00	5.75E-02	-1.342	39/87 (45%)	0/87 (0%)	14/87 (16%)	34/87 (39%)	CAMK2B,ITPR2,GRM2,PLCD4,PRKAR2B,PRKAG2,PRKACB,PIK3CB,GRM3,PRKCB,ITPR1,PRKAR1B,GRM1,PIK3C3,PRKAR2A,PRKCE,SRC,CAMK1D,PRKAR1A,PRKCD,PIK3R2,CAMK2G,PDIA3,PRKAG1,CREB1,CAMK2D,PIK3R1,GRIN1,KCNQ2,GRIA3,PIK3CA,GRIA2,GRM7,PLCB3,NTRK2,PRKCI,GRM5,PRKCZ,MAPK3,PLCB1,GRIA1,CAMK4,CAMK2A,GRIN2B,ITPR3,PRKCA,CAMK1,MAPK1,PLCH2,PRKD1,PLCL2,PRKACA,PRKCG
CXCR4 Signaling	3.06E00	4.55E-02	0.000	47/132 (36%)	0/132 (0%)	38/132 (29%)	47/132 (36%)	ITPR2,GNA13,GNA11,MRAS,MAPK10,GNG7,GNB1,MAP2K1,ROCK2,PIK3CB,GNAL,GNAI3,PAK3,ADCY1,GNAQ,ADCY3,GNG4,PRKCB,ITPR1,RHOT1,PIK3C3,MAPK9,PRKCE,GNAZ,MYL4,SRC,ELMO2,MYL6B,MYL9,PTK2,GNB2,PRKCD,NRAS,GNB5,PIK3R2,RHOB,GNG12,BCAR1,GNAI1,GNB4,AKT3,AKT1,GNAO1,RHOC,PIK3R1,GNAI2,PIK3CA,GNG3,PLCB3,ADCY2,ROCK1,CRK,MAPK8,PRKCI,ELMO1,PRKCZ,MAPK3,FNBP1,PLCB1,KRAS,PAK2,RHOT2,RRAS2,GNB2L1,ADCY5,PAK1,MYL12A,AKT2,RHOA,RHOG,…
Nitric Oxide Signaling in the Cardiovascular System	3.03E00	5.62E-02	-2.236	35/89 (39%)	0/89 (0%)	12/89 (13%)	42/89 (47%)	ITPR2,AKT3,AKT1,PRKAR2B,PRKAA1,GUCY1B3,GUCY1A3,PRKAG2,PIK3R1,MAP2K1,PRKACB,PIK3CB,PIK3CA,PRKCB,PRKAR1B,ITPR1,PDE1C,PRKCI,PRKCZ,HSP90AA1,PIK3C3,MAPK3,PRKAR2A,PRKCE,CACNA1E,HSP90B1,PDE1B,CAMK4,ATP2A2,PDE2A,AKT2,PRKAR1A,CAV1,PRKCD,PRKCA,ITPR3,PIK3R2,MAP2K2,MAPK1,CACNA1C,PRKD1,PRKAG1,HSP90AB1,PRKACA,PDE1A,RYR2,PRKCG
Phospholipase C Signaling	3E00	3.76E-02	-0.447	50/186 (27%)	0/186 (0%)	47/186 (25%)	89/186 (48%)	PEBP1,SOS2,GNA13,GNB1,RAP1A,ADCY1,GNAQ,PRKCB,ITPR1,RHOT1,PRKCE,MYL4,SRC,MYL6B,MYL9,HDAC3,GNB2,PRKCD,NRAS,GNB5,RAP1B,ARHGEF9,GNB4,CREB1,ARHGEF12,RHOC,FYN,ARHGEF17,ARHGEF7,ITGB1,PLCB3,CREBBP,ADCY2,PRKCI,PRKCZ,FNBP1,HDAC2,GNB2L1,ADCY5,MYL12A,CAMK4,PPP3CA,SOS1,RHOG,HDAC6,ITPR3,PRKCA,ARHGEF1,RALA,MAP2K2,PRKD1,PLA2G12A,GNG2,HRAS,RRAS,RAC1,ADCY9,PRKCG,ITPR2,PLD3,MRAS,GNG7,CHP1,MAP2K1,MPRIP,RALB,ADCY3,GN…
Erythropoietin Signaling	2.9E00	7.14E-02	NaN	20/56 (36%)	0/56 (0%)	13/56 (23%)	23/56 (41%)	SOS2,AKT3,AKT1,MRAS,PIK3R1,MAP2K1,PIK3CB,PIK3CA,GRB2,PRKCB,PRKCI,PRKCZ,PIK3C3,MAPK3,PRKCE,KRAS,SRC,RRAS2,SOS1,AKT2,RELA,NRAS,PRKCD,PDPK1,PRKCA,PIK3R2,MAP2K2,MAPK1,PRKD1,STAT5B,HRAS,RRAS,PRKCG
GM-CSF Signaling	2.9E00	7.14E-02	0.000	18/56 (32%)	0/56 (0%)	17/56 (30%)	21/56 (38%)	CAMK2B,SOS2,AKT3,AKT1,MRAS,CAMK2D,PIK3R1,MAP2K1,PIK3CB,STAT3,PIK3CA,STAT1,PTPN11,GRB2,PRKCB,PIK3C3,MAPK3,KRAS,RRAS2,GNB2L1,PPP3CB,PPP3CA,SOS1,AKT2,CAMK2A,NRAS,PPP3R1,PIK3R2,CAMK2G,MAP2K2,MAPK1,BCL2L1,STAT5B,HRAS,RRAS
Renin-Angiotensin Signaling	2.84E00	5.1E-02	-2.000	40/98 (41%)	0/98 (0%)	20/98 (20%)	38/98 (39%)	SOS2,ITPR2,PRKAR2B,MRAS,MAPK10,PRKAG2,MAP2K1,PRKACB,PIK3CB,PAK3,ADCY1,STAT3,GNAQ,ADCY3,PRKCB,ITPR1,PRKAR1B,PIK3C3,MAPK9,PRKAR2A,PRKCE,PTK2,PRKAR1A,PRKCD,NRAS,PTK2B,PIK3R2,PRKAG1,MAPK14,PIK3R1,ACE,PIK3CA,STAT1,GRB2,ADCY2,MAPK8,PRKCI,PRKCZ,MAPK3,KRAS,PAK2,RRAS2,ADCY5,PAK1,SOS1,SHC3,RELA,GNAS,ITPR3,PRKCA,MAP2K4,MAP2K2,MAPK1,PRKD1,PRKACA,HRAS,RRAS,RAC1,ADCY9,PRKCG
Corticotropin Releasing Hormone Signaling	2.84E00	5.1E-02	-2.236	38/98 (39%)	0/98 (0%)	9/98 (9%)	51/98 (52%)	GNAI1,ITPR2,MAPK14,CREB1,PRKAR2B,GNAO1,GUCY1B3,CNR1,GUCY1A3,PRKAG2,MAP2K1,PRKACB,RAP1A,GNAI3,ADCY1,ARPC5,GNAQ,GNAI2,NOS1,ADCY3,PRKCB,PRKAR1B,ADCY2,CREBBP,ITPR1,PRKCI,PRKCZ,MAPK3,PRKAR2A,PRKCE,ADCY5,CAMK4,PRKAR1A,PRKCD,BRAF,GNAS,PRKCA,ITPR3,MAP2K2,RAP1B,MAPK1,PRKD1,PRKAG1,PRKACA,MEF2A,ADCY9,PRKCG
Molecular Mechanisms of Cancer	2.84E00	2.84E-02	NaN	78/317 (25%)	0/317 (0%)	55/317 (17%)	184/317 (58%)	CAMK2B,SOS2,GNA13,GNA11,PRKAR2B,MAPK10,CYCS,SMAD4,RAP1A,PIK3CB,GNAL,PAK3,ADCY1,GNAQ,PRKCB,LRP1,RHOT1,PRKAR1B,MAPK9,RAP2A,PRKAR2A,PRKCE,GNAZ,SRC,CTNNB1,SMAD2,PTK2,PRKAR1A,PRKCD,NRAS,RALBP1,CAMK2G,RASGRF2,RAP1B,BCL2L1,BAX,ARHGEF9,PRKAG1,BID,GNAI1,RASGRF1,GNAO1,ARHGEF12,RHOC,GAB1,APC,FYN,ARHGEF17,ARHGEF7,PTPN11,ITGB1,SIN3A,PLCB3,CREBBP,ADCY2,RAP2B,CRK,PRKCI,PRKCZ,FOXO1,FNBP1,CTNNA1,MAP3K5,ADCY5,PAK1…
Growth Hormone Signaling	2.84E00	6.9E-02	-2.000	16/58 (28%)	0/58 (0%)	7/58 (12%)	35/58 (60%)	PRKCE,RPS6KA3,PIK3R1,PIK3CB,RPS6KA5,STAT3,PRKCD,PDPK1,PIK3CA,PRKCA,RPS6KA2,PIK3R2,STAT1,MAPK1,RPS6KA1,PRKCB,PRKD1,PRKCI,STAT5B,PRKCZ,PIK3C3,PRKCG,MAPK3
P2Y Purigenic Receptor Signaling Pathway	2.77E00	4.9E-02	-2.236	46/102 (45%)	0/102 (0%)	18/102 (18%)	38/102 (37%)	PLCD4,PRKAR2B,MRAS,GNG7,GNB1,PRKAG2,MAP2K1,PRKACB,PIK3CB,GNAI3,ADCY1,GNAQ,ADCY3,GNG4,PRKCB,PRKAR1B,PIK3C3,PRKAR2A,PRKCE,GNB2,PRKAR1A,PRKCD,NRAS,GNB5,PIK3R2,GNG12,PDIA3,PRKAG1,GNAI1,GNB4,AKT3,AKT1,CREB1,PIK3R1,GNAI2,PIK3CA,GNG3,PLCB3,CREBBP,ADCY2,PRKCI,PRKCZ,MAPK3,PLCB1,KRAS,RRAS2,GNB2L1,ADCY5,AKT2,RELA,GNG5,GNAS,PRKCA,MAP2K2,MAPK1,PLCH2,PRKD1,GNG2,PLCL2,PRKACA,HRAS,RRAS,ADCY9,PRKCG
CREB Signaling in Neurons	2.76E00	3.97E-02	-1.633	67/151 (44%)	0/151 (0%)	29/151 (19%)	55/151 (36%)	CAMK2B,SOS2,ITPR2,GRM2,PLCD4,GNA13,GNA11,PRKAR2B,MRAS,GNG7,GNB1,PRKAG2,MAP2K1,PRKACB,PIK3CB,GNAL,GNAI3,GRM3,ADCY1,GNAQ,ADCY3,GNG4,PRKCB,ITPR1,PRKAR1B,GRM1,PIK3C3,PRKAR2A,PRKCE,GNAZ,POLR2E,GRIK2,GNB2,PRKAR1A,PRKCD,NRAS,GNB5,PIK3R2,CAMK2G,GNG12,PDIA3,PRKAG1,GNAI1,GNB4,AKT3,AKT1,CREB1,GNAO1,CAMK2D,PIK3R1,GRIN1,POLR2B,GNAI2,GRIA3,PIK3CA,GNG3,GRIA2,GRM7,PLCB3,GRB2,CREBBP,ADCY2,PRKCI,GRM5,PRKCZ,GRIK3,M…
IL-3 Signaling	2.73E00	6.45E-02	NaN	22/62 (35%)	0/62 (0%)	19/62 (31%)	21/62 (34%)	AKT3,AKT1,MRAS,CHP1,PIK3R1,MAP2K1,PIK3CB,STAT3,PIK3CA,STAT1,GRB2,PRKCB,PRKCI,PRKCZ,FOXO1,PIK3C3,MAPK3,PRKCE,KRAS,RRAS2,CRKL,PAK1,PPP3CB,PPP3CA,SOS1,AKT2,BAD,NRAS,PRKCD,GAB2,PPP3R1,PRKCA,PIK3R2,MAP2K2,MAPK1,PRKD1,STAT5B,HRAS,RRAS,RAC1,PRKCG
Prolactin Signaling	2.66E00	6.15E-02	-2.000	22/65 (34%)	0/65 (0%)	12/65 (18%)	31/65 (48%)	SOS2,MRAS,PIK3R1,MAP2K1,PIK3CB,STAT3,FYN,PIK3CA,STAT1,PTPN11,GRB2,PRKCB,CREBBP,PRKCI,PRKCZ,PIK3C3,MAPK3,PRKCE,KRAS,RRAS2,SOS1,NRAS,PRKCD,PDPK1,PRKCA,NR3C1,PIK3R2,MAP2K2,MAPK1,PRKD1,STAT5B,HRAS,RRAS,PRKCG
Role of NFAT in Cardiac Hypertrophy	2.62E00	3.73E-02	-1.633	65/161 (40%)	0/161 (0%)	34/161 (21%)	62/161 (39%)	CAMK2B,SOS2,PRKAR2B,MAPK10,GNB1,PIK3CB,ADCY1,GNAQ,PRKCB,ITPR1,PRKAR1B,MAPK9,PRKAR2A,PRKCE,SRC,CAMK1D,HDAC3,GNB2,PRKAR1A,PRKCD,NRAS,GNB5,CAMK2G,PRKAG1,GNAI1,GNB4,PLCB3,ADCY2,PRKCI,PRKCZ,AKAP5,HDAC2,GNB2L1,ADCY5,CAMK4,PPP3CA,SOS1,CAMK2A,HDAC6,ITPR3,PRKCA,CAMK1,MAP2K2,PLCH2,PRKD1,GNG2,PRKACA,HRAS,RRAS,ADCY9,PRKCG,ITPR2,PLCD4,MRAS,GNG7,CHP1,PRKAG2,MAP2K1,PRKACB,GNAI3,ADCY3,GNG4,HDAC1,PIK3C3,HDAC5,RCA…
RAR Activation	2.58E00	3.66E-02	NaN	54/164 (33%)	0/164 (0%)	23/164 (14%)	87/164 (53%)	NCOR2,PML,RPL7A,PTEN,PRKAR2B,MAPK10,CSNK2A2,SMARCA4,PRKAG2,SMAD4,MAP2K1,PRKACB,PIK3CB,SMARCB1,ADCY1,RDH14,ADCY3,ALDH1A1,PRKCB,PRKAR1B,MAPK9,PRKAR2A,PRKCE,SRC,NCOA1,SMARCD1,SMAD2,MED1,RBP1,SMARCE1,PRMT1,PRKAR1A,PRKCD,ACTL6B,PIK3R2,PSMC5,SMARCD3,PRKAG1,STAT5B,ARID1A,MAPK14,AKT3,AKT1,PBRM1,SMARCA2,PIK3R1,CRABP1,SNW1,PIK3CA,CREBBP,ADCY2,NCOR1,MAPK8,PRKCI,PRKCZ,CARM1,SRA1,MAP3K5,RDH11,ADCY5,CSNK2B,RXR…
Cardiac β-adrenergic Signaling	2.49E00	4.24E-02	-2.000	50/118 (42%)	0/118 (0%)	21/118 (18%)	47/118 (40%)	PPP2R5E,PRKAR2B,MRAS,PPP2R4,GNG7,GNB1,PRKAG2,PRKACB,ADCY1,ADCY3,PPP2R5A,PPP1R1A,GNG4,PPP2CB,PDE3A,PDE1C,PRKAR1B,AKAP1,PRKAR2A,PDE12,CACNA1E,AKAP2,ATP2A2,PKIA,PPP2R2C,GNB2,PRKAR1A,AKAP7,ENPP6,GNB5,PDE8B,GNG12,PPP1CB,PRKAG1,Ppp1cc,TDP2,PPP1R14A,AKAP10,GNB4,PDE4A,PPP1R7,SLC8A1,PDE10A,AKAP12,GNG3,PDE7B,PDE6D,PPP2R1A,ADCY2,AKAP5,PPP2CA,GNB2L1,ADCY5,PPP1R12A,PPP1CA,PDE1B,AKAP8,PDE2A,PPP2R2A,PPP1R14C,AD…
Mechanisms of Viral Exit from Host Cells	2.47E00	8.33E-02	NaN	16/36 (44%)	1/36 (3%)	10/36 (28%)	9/36 (25%)	SH3GL3,ACTG1,VPS36,PRKCB,PRKCI,PRKCZ,LMNB2,VPS25,VPS4A,PRKCE,TSG101,SH3GL1,SH3GL2,SH3GLB2,LMNB1,CHMP4B,CHMP3,XPO1,PRKCD,CHMP2B,PRKCA,SH3GLB1,CHMP2A,VPS28,PRKD1,PDCD6IP,PRKCG
phagosome formation	2.45E00	5.41E-02	NaN	13/74 (18%)	0/74 (0%)	16/74 (22%)	45/74 (61%)	PLCD4,RHOC,PIK3R1,PIK3CB,FN1,PIK3CA,ITGB1,PLCB3,PRKCB,RHOT1,PRKCI,PRKCZ,PIK3C3,FNBP1,PRKCE,PLCB1,RHOT2,RHOA,RHOG,PRKCD,PRKCA,PIK3R2,RHOB,PLCH2,PDIA3,PRKD1,PLCL2,RHOF,PRKCG
Virus Entry via Endocytic Pathways	2.43E00	5.33E-02	NaN	24/75 (32%)	1/75 (1%)	19/75 (25%)	31/75 (41%)	FLNB,CDC42,MRAS,PIK3R1,DNM1,PIK3CB,AP1B1,ITGA1,FYN,PIK3CA,ACTG1,ITGB1,RAC3,PRKCB,PRKCI,PRKCZ,TFRC,PIK3C3,PRKCE,KRAS,SRC,ITSN1,RRAS2,FLNA,CLTC,ITGA6,B2M,CAV1,NRAS,PRKCD,PRKCA,CLTA,PIK3R2,DNM2,AP2A2,AP2A1,PRKD1,CLTB,AP2S1,AP2M1,HRAS,RRAS,RAC1,PRKCG
G-Protein Coupled Receptor Signaling	2.41E00	2.95E-02	NaN	71/237 (30%)	0/237 (0%)	27/237 (11%)	139/237 (59%)	CAMK2B,SOS2,GRM2,GNA11,PRKAR2B,CNR1,RAP1A,PIK3CB,GNAL,GRM3,ADCY1,GNAQ,PRKCB,PRKAR1B,GRM1,PRKAR2A,PRKCE,PDE12,SRC,RGS7,PRKAR1A,NRAS,GABBR2,PTK2B,ENPP6,RGS14,CAMK2G,RGS10,PRKAG1,GNAI1,TDP2,CREB1,PDE4A,GNAO1,FYN,PDE7B,PLCB3,CREBBP,ADCY2,GRM5,ADCY5,PDE1B,CAMK4,PDE2A,SOS1,CAMK2A,PRKCA,MAP2K2,RPS6KA1,PRKACA,HRAS,APEX1,RRAS,ADCY9,PRKCG,MRAS,GABBR1,PRKAG2,MAP2K1,PRKACB,GNAI3,IKBKG,STAT3,ADCY3,PDE1C,PDE3A…
eNOS Signaling	2.4E00	4.03E-02	-2.236	38/124 (31%)	0/124 (0%)	17/124 (14%)	69/124 (56%)	HSPA2,HSPA1A/HSPA1B,ITPR2,PRKAR2B,PRKAA1,GUCY1B3,GUCY1A3,PRKAG2,PRKACB,PIK3CB,ADCY1,GNAQ,ADCY3,PRKCB,ITPR1,STUB1,PRKAR1B,PIK3C3,PRKAR2A,PRKCE,HSP90B1,PRKAR1A,PRKCD,DNM2,PIK3R2,CASP3,PRKAG1,AQP4,AKT3,AKT1,PRKAB1,PIK3R1,HSPA14,PIK3CA,HSPA8,ADCY2,PRKCI,HSP90AA1,PRKCZ,ADCY5,CAMK4,AKT2,CAV1,HSPA9,PDPK1,GNAS,ITPR3,PRKCA,HSPA5,PRKAA2,PRKD1,PRKACA,HSP90AB1,ADCY9,PRKCG
Neuregulin Signaling	2.39E00	5.19E-02	-2.000	27/77 (35%)	0/77 (0%)	18/77 (23%)	32/77 (42%)	SOS2,PTEN,AKT3,AKT1,PICK1,MRAS,PIK3R1,MAP2K1,PTPN11,ITGB1,GRB2,PRKCB,CRK,PRKCI,PRKCZ,HSP90AA1,MAPK3,PRKCE,KRAS,EGFR,MTOR,SRC,RRAS2,CRKL,HSP90B1,CDK5,MATK,SOS1,AKT2,BAD,NRAS,PRKCD,PDPK1,DLG4,PRKCA,PIK3R2,CDKN1B,MAP2K2,MAPK1,PRKD1,HSP90AB1,STAT5B,HRAS,RRAS,PRKCG
Tec Kinase Signaling	2.35E00	3.94E-02	-1.342	35/127 (28%)	1/127 (1%)	26/127 (20%)	65/127 (51%)	GNA13,GNA11,MRAS,MAPK10,GNG7,GNB1,PIK3CB,GNAL,GNAI3,PAK3,STAT3,GNAQ,ACTG1,GNG4,PRKCB,RHOT1,PIK3C3,MAPK9,PRKCE,GNAZ,SRC,PTK2,GNB2,PRKCD,GNB5,PTK2B,PIK3R2,RHOB,GNG12,GTF2I,STAT5B,GNAI1,GNB4,GNAO1,RHOC,PIK3R1,GNAI2,FYN,PIK3CA,GNG3,STAT1,ITGB1,MAPK8,PRKCI,PRKCZ,FNBP1,VAV3,PAK2,RHOT2,GNB2L1,PAK1,RHOA,RELA,RHOG,GNG5,GNAS,PRKCA,MAP2K4,PRKD1,GNG2,RHOF,PRKCG
Gap Junction Signaling	2.31E00	3.85E-02	NaN	51/130 (39%)	2/130 (2%)	29/130 (22%)	48/130 (37%)	MAP2K5,SOS2,ITPR2,PLCD4,TUBB3,PRKAR2B,MRAS,GUCY1B3,TUBG1,GUCY1A3,PRKAG2,MAP2K1,PRKACB,PIK3CB,GNAI3,ADCY1,CSNK1D,GNAQ,TUBA1A,ACTG1,ADCY3,PRKCB,ITPR1,PRKAR1B,PIK3C3,PRKAR2A,CSNK1E,PRKCE,EGFR,SRC,CTNNB1,DBN1,TUBB4B,PRKAR1A,PRKCD,NRAS,PPP3R1,PIK3R2,PDIA3,TUBA4A,PRKAG1,GNAI1,CSNK1A1,AKT3,AKT1,TUBA8,TUBB6,PIK3R1,TUBB2A,DRD1,GNAI2,PIK3CA,PLCB3,GRB2,ADCY2,PRKCI,PRKCZ,MAPK3,PLCB1,KRAS,RRAS2,TUBB,ADCY5,PPP…
G Beta Gamma Signaling	2.31E00	4.94E-02	-2.000	44/81 (54%)	0/81 (0%)	16/81 (20%)	21/81 (26%)	SOS2,CDC42,GNA13,GNA11,PRKAR2B,MRAS,GNG7,GNB1,PRKAG2,PRKACB,GNAL,GNAI3,ADCY1,GNAQ,GNG4,PRKCB,PRKAR1B,PRKAR2A,PRKCE,GNAZ,EGFR,SRC,GNB2,PRKAR1A,PRKCD,NRAS,GNB5,DNM2,GNG12,PRKAG1,GNAI1,GNB4,AKT3,AKT1,GNAO1,GNAI2,GNG3,GRB2,ADCY2,PRKCI,PRKCZ,MAPK3,KRAS,RRAS2,GNB2L1,PAK1,AKT2,SOS1,CAV1,PDPK1,GNG5,GNAS,PRKCA,MAPK1,PRKD1,GNG2,PRKACA,HRAS,RRAS,PRKCG
UVC-Induced MAPK Signaling	2.3E00	7.32E-02	NaN	17/41 (41%)	0/41 (0%)	13/41 (32%)	11/41 (27%)	MAPK14,MRAS,MAPK10,MAP2K1,PRKCB,MAPK8,PRKCI,PRKCZ,MAPK9,MAPK3,PRKCE,KRAS,EGFR,SRC,RRAS2,SMPD3,SMPD1,NRAS,PRKCD,BRAF,PRKCA,MAP2K4,MAP2K2,MAPK1,PRKD1,ARAF,HRAS,SMPD4,RRAS,PRKCG
Acute Phase Response Signaling	2.3E00	3.82E-02	NaN	32/131 (24%)	0/131 (0%)	25/131 (19%)	74/131 (56%)	SOS2,FTL,SERPINF1,MRAS,MAP2K1,PIK3CB,PLG,IKBKG,STAT3,C4A/C4B,HP,HMOX2,ITIH2,MAPK9,HNRNPK,ITIH3,RBP1,SERPINA3,IKBKB,SOD2,IL18,NRAS,NR3C1,PIK3R2,MAP2K6,TTR,MAP2K7,MAPK14,AKT3,TF,AKT1,MYD88,PIK3R1,CRABP1,FN1,PIK3CA,PTPN11,GRB2,SERPINF2,MAPK8,ECSIT,MAPK3,KRAS,MAP3K5,MTOR,RRAS2,CP,AKT2,SOS1,RELA,PDPK1,MAP2K4,MAP2K2,MAPK1,TAB1,HRAS,RRAS
Glioma Signaling	2.26E00	4.76E-02	-1.000	25/84 (30%)	0/84 (0%)	17/84 (20%)	42/84 (50%)	CAMK2B,SOS2,PTEN,AKT3,AKT1,MRAS,CAMK2D,PIK3R1,MAP2K1,PIK3CB,PIK3CA,GRB2,SIN3A,PRKCB,PA2G4,PRKCI,PRKCZ,PIK3C3,MAPK3,PRKCE,KRAS,EGFR,MTOR,RRAS2,CAMK4,CAMK1D,SOS1,AKT2,CAMK2A,IGF2R,NRAS,PRKCD,PRKCA,PIK3R2,CAMK1,CAMK2G,MAP2K2,MAPK1,PRKD1,HRAS,RRAS,PRKCG
nNOS Signaling in Neurons	2.19E00	6.67E-02	NaN	14/45 (31%)	0/45 (0%)	11/45 (24%)	20/45 (44%)	CHP1,GRIN1,NOS1,PRKCB,PFKM,PRKCI,PRKCZ,DLG2,CAPNS1,CAPN7,CAPN2,PRKCE,CAPN1,PPP3CB,CAMK4,PPP3CA,CAMK2A,GRIN2B,PRKCD,DLG4,PPP3R1,PRKCA,CAPN5,PRKD1,PRKCG
Hepatic Cholestasis	2.18E00	3.57E-02	NaN	28/140 (20%)	0/140 (0%)	8/140 (6%)	104/140 (74%)	ABCB1,MAP4K2,MYD88,PRKAR2B,MAPK10,PRKAG2,PRKACB,IKBKG,ABCB11,ADCY1,ADCY3,PRKCB,PRKAR1B,ADCY2,MAPK8,PRKCI,PRKCZ,MAPK9,PRKAR2A,PRKCE,ADCY5,TJP2,IKBKB,RELA,PRKAR1A,IL18,PRKCD,GNAS,PRKCA,MAP2K4,PRKD1,MAP3K4,PRKAG1,PRKACA,ADCY9,PRKCG
Xenobiotic Metabolism Signaling	2.15E00	2.99E-02	NaN	50/201 (25%)	0/201 (0%)	47/201 (23%)	104/201 (52%)	CAMK2B,NCOR2,PPP2R5E,MAP2K5,FTL,PPP2R4,MAP3K10,PIK3CB,ALDH3A2,PPP2R5A,ALDH1A1,GSTM2,PRKCB,MAPK9,PRKCE,HSP90B1,CAMK1D,PRKCD,NRAS,CAMK2G,PTGES3,MAP3K4,MAOB,SUMO1,GSTM5,ALDH1L2,CREBBP,GRIP1,PRKCI,GSTP1,PRKCZ,CUL3,PPP2CA,MAP3K5,AIP,CAMK4,PPP2R2A,CAMK2A,ALDH4A1,PRKCA,CAMK1,MAP2K2,PRKD1,HSP90AB1,HRAS,RRAS,DNAJC7,PRKCG,MRAS,NQO2,MAP2K1,ALDH9A1,GSTO1,CAT,PPP2CB,PIK3C3,MGST3,HDAC5,GSTT2/GSTT2B,NCOA1,MED1,…
Calcium-induced T Lymphocyte Apoptosis	2.14E00	6.38E-02	NaN	10/47 (21%)	0/47 (0%)	10/47 (21%)	27/47 (57%)	PRKCE,HDAC2,ITPR2,CHP1,PPP3CB,CAMK4,ATP2A2,PPP3CA,PRKCD,PPP3R1,ITPR3,PRKCA,PRKCB,ITPR1,PRKD1,PRKCI,PRKCZ,HDAC1,PRKCG,CAPN2
UVB-Induced MAPK Signaling	2.14E00	6.38E-02	NaN	17/47 (36%)	0/47 (0%)	11/47 (23%)	19/47 (40%)	MAPK14,AKT1,MAPK10,PIK3R1,MAP2K1,PIK3CB,RPS6KA5,PIK3CA,PRKCB,MAPK8,PRKCI,PRKCZ,PIK3C3,MAPK9,MAPK3,PRKCE,EGFR,MTOR,RPS6KA3,BAD,PRKCD,PRKCA,MAP2K4,PIK3R2,MAPK1,PRKD1,EIF4E,PRKCG
Huntington's Disease Signaling	2.14E00	2.97E-02	-2.236	75/202 (37%)	0/202 (0%)	55/202 (27%)	72/202 (36%)	NCOR2,SOS2,HSPA1A/HSPA1B,GNA11,GNB1,MAP3K10,CYCS,PSMF1,PIK3CB,SDHB,SNCA,GNAQ,PRKCB,ITPR1,GRM1,GOSR2,MAPK9,PRKCE,HDAC3,ZDHHC17,GNB2,CPLX2,PRKCD,CAPN5,DNM2,GNB5,CLTB,BCL2L1,BAX,GNB4,CREB1,PENK,SNAP25,NAPA,GOSR1,YKT6,CACNA1B,DCTN1,HSPA14,VTI1A,HTT,HSPA8,HAP1,SIN3A,PLCB3,CREBBP,NCOR1,PRKCI,GRM5,PRKCZ,CAPN7,HDAC2,GNB2L1,CAPN1,SOS1,GRIN2B,HSPA9,HDAC6,PRKCA,NAPB,PRKD1,VTI1B,GNG2,HRAS,DNM3,PRKCG,HSPA2,DN…
Cholecystokinin/Gastrin-mediated Signaling	2.13E00	4.4E-02	-1.000	30/91 (33%)	0/91 (0%)	23/91 (25%)	38/91 (42%)	MAP2K5,SOS2,ITPR2,GNA13,MRAS,MAPK10,MAP2K1,ROCK2,GNAQ,PRKCB,ITPR1,RHOT1,MAPK9,PRKCE,EGFR,SRC,PTK2,IL18,PRKCD,NRAS,PTK2B,RHOB,BCAR1,MAP2K6,MAPK14,RHOC,PLCB3,GRB2,ROCK1,MAPK8,PRKCI,PRKCZ,MAPK3,FNBP1,PLCB1,KRAS,RHOT2,RRAS2,EPHA4,SOS1,RHOA,RHOG,ITPR3,PRKCA,MAP2K4,MAP2K2,MAPK1,PRKD1,HRAS,RHOF,RRAS,MEF2A,PRKCG
Production of Nitric Oxide and Reactive Oxygen Species in Macrophages	2.13E00	3.47E-02	-1.342	34/144 (24%)	0/144 (0%)	31/144 (22%)	79/144 (55%)	PPP2R5E,PPP2R4,MAPK10,MAP3K10,MAP2K1,RAP1A,PIK3CB,IKBKG,PPP2R5A,CAT,PPP2CB,PRKCB,RHOT1,PIK3C3,MAPK9,PRKCE,APOD,IKBKB,PPP2R2C,PRKCD,PIK3R2,CLU,RHOB,RAP1B,PPP1CB,MAP3K4,MAP2K7,PPP1R14A,MAPK14,AKT3,AKT1,PPP1R7,RHOC,PIK3R1,PIK3CA,STAT1,PPP2R1A,CREBBP,MAPK8,PRKCI,SIRPA,PRKCZ,PPP2CA,MAPK3,FNBP1,Map3k7,RHOT2,MAP3K5,PPP1R12A,PPP1CA,PCYOX1,AKT2,PPP2R2A,RHOA,RELA,RHOG,PPP1R14C,PRKCA,MAP2K4,MAPK1,PRKD1,APOE…
Sperm Motility	2.1E00	4.3E-02	-2.000	29/93 (31%)	0/93 (0%)	15/93 (16%)	49/93 (53%)	PLCD4,ITPR2,TWF1,PDE4A,PLA2G16,PRKAR2B,MRAS,GUCY1B3,GUCY1A3,PRKAG2,PRKACB,SLC12A2,PRDX6,PLCB3,PRKCB,PRKAR1B,ITPR1,PDE1C,PNPLA8,PRKCI,PRKCZ,PRKAR2A,PRKCE,PLCB1,PDE1B,CAMK4,PDE2A,PTK2,PRKAR1A,PRKCD,GNAS,PRKCA,ITPR3,PTK2B,PLCH2,PDIA3,PRKD1,PLA2G12A,ABHD3,PLCL2,PRKAG1,PRKACA,PDE1A,PRKCG
Lipoate Biosynthesis and Incorporation II	2.07E00	1E00	NaN	0/1 (0%)	0/1 (0%)	1/1 (100%)	0/1 (0%)	LIAS
Cellular Effects of Sildenafil (Viagra)	2.05E00	4.17E-02	NaN	38/96 (40%)	1/96 (1%)	12/96 (13%)	45/96 (47%)	ITPR2,PLCD4,PRKAR2B,GUCY1B3,GUCY1A3,PRKAG2,PRKACB,MYH9,MPRIP,ADCY1,MYH14,ACTG1,ADCY3,MYH11,PDE3A,ITPR1,PDE1C,PRKAR1B,PRKAR2A,CACNG8,CACNA1E,MYL4,MYL6B,MYL9,PRKAR1A,MYLK,PPP1CB,PDIA3,PRKAG1,PDE4A,KCNQ2,MYH4,PLCB3,ADCY2,PLCB1,ADCY5,PPP1R12A,PDE1B,MYL12A,CAMK4,MYH10,PDE2A,SLC4A10,GNAS,ITPR3,PLCH2,CACNA1C,PLCL2,PRKACA,ADCY9,PDE1A
PPARα/RXRα Activation	2.04E00	3.31E-02	NaN	54/151 (36%)	0/151 (0%)	19/151 (13%)	78/151 (52%)	NCOR2,ACADL,SOS2,PLCD4,GNA11,PRKAR2B,MRAS,PRKAA1,GPD1,PRKAG2,SMAD4,MAP2K1,PRKACB,IKBKG,ADCY1,GNAQ,ADCY3,PRKCB,PRKAR1B,PRKAR2A,SLC27A1,SMAD2,MED1,HSP90B1,IKBKB,PRKAR1A,BMPR2,TGS1,NRAS,PDIA3,PRKAG1,STAT5B,MAP2K6,MAP2K7,MAPK14,GOT2,FASN,PRKAB1,ACOX1,PLCB3,GRB2,CREBBP,ADCY2,NCOR1,MAPK8,HSP90AA1,MAPK3,CHD5,PLCB1,KRAS,MAP4K4,AIP,RRAS2,ADCY5,ACAA1,SOS1,RELA,GNAS,PRKCA,MAP2K4,AP2A2,MAP2K2,PRKAA2,MAPK1,PL…
ErbB4 Signaling	2.04E00	5.88E-02	NaN	18/51 (35%)	0/51 (0%)	11/51 (22%)	22/51 (43%)	SOS2,AKT1,MRAS,PIK3R1,MAP2K1,PIK3CB,PIK3CA,GRB2,PRKCB,PRKCI,PRKCZ,PIK3C3,MAPK3,PRKCE,KRAS,RRAS2,SOS1,NCSTN,NRAS,PRKCD,PDPK1,PRKCA,PIK3R2,MAP2K2,MAPK1,PRKD1,HRAS,RRAS,PRKCG
ERK/MAPK Signaling	2.02E00	3.27E-02	-2.236	44/153 (29%)	0/153 (0%)	37/153 (24%)	72/153 (47%)	PPP2R5E,SOS2,PRKAR2B,MRAS,PPP2R4,PRKAG2,TLN2,MAP2K1,PRKACB,RAP1A,PIK3CB,PAK3,RPS6KA5,STAT3,PPP2R5A,RAC3,PPP2CB,PRKCB,PRKAR1B,PIK3C3,PRKAR2A,PRKCE,SRC,YWHAG,CRKL,PPP2R2C,PTK2,BAD,PRKAR1A,HSPB1,PRKCD,NRAS,BRAF,PTK2B,PIK3R2,LAMTOR3,RAP1B,PPP1CB,BCAR1,PRKAG1,YWHAZ,YWHAQ,PPP1R14A,CREB1,PPP1R7,PIK3R1,YWHAH,FYN,PIK3CA,STAT1,ITGB1,PPP2R1A,GRB2,CREBBP,CRK,PRKCI,YWHAB,PPP2CA,MAPK3,KRAS,PAK2,RRAS2,RAPGEF4,P…
Androgen Signaling	1.99E00	4E-02	-2.000	40/100 (40%)	0/100 (0%)	13/100 (13%)	47/100 (47%)	GNA13,GNA11,PRKAR2B,MRAS,GNG7,GNB1,PRKAG2,PRKACB,GNAL,GNAI3,GNAQ,GNG4,PRKCB,PRKAR1B,PRKAR2A,PRKCE,GNAZ,SRC,NCOA1,DNAJB1,POLR2E,GNB2,PRKAR1A,CALR,PRKCD,GNB5,GNG12,PRKAG1,GNAI1,GNB4,GNAO1,POLR2B,GNAI2,GNG3,CREBBP,PRKCI,HSP90AA1,PRKCZ,MAPK3,GNB2L1,CAMK4,RELA,POLR2H,GNG5,GNAS,PRKCA,MAPK1,PRKD1,GNG2,PRKACA,POLR2G,NCOA2,PRKCG
Type II Diabetes Mellitus Signaling	1.98E00	3.96E-02	NaN	27/101 (27%)	0/101 (0%)	20/101 (20%)	54/101 (53%)	MAP2K7,AKT3,AKT1,PRKAA1,MAPK10,PRKAB1,PKM,SLC27A4,PRKAG2,PIK3R1,PIK3CB,ACSL6,IKBKG,ACSL1,PIK3CA,ACSL5,PRKCB,MAPK8,PRKCI,PRKCZ,PIK3C3,MAPK9,MAPK3,PRKCE,SLC27A1,MAP3K5,MTOR,IRS2,SMPD3,SMPD1,IKBKB,AKT2,RELA,ACSL4,PRKCD,PDPK1,PRKCA,MAP2K4,PIK3R2,ACSBG1,PRKAA2,ACSL3,MAPK1,PRKD1,PRKAG1,SMPD4,PRKCG
Macropinocytosis Signaling	1.89E00	5.17E-02	NaN	12/58 (21%)	0/58 (0%)	18/58 (31%)	28/58 (48%)	CDC42,MRAS,PIK3R1,PIK3CB,PIK3CA,ITGB1,ABI1,PRKCB,PRKCI,ACTN4,PRKCZ,PIK3C3,PRKCE,KRAS,SRC,RRAS2,PAK1,RAB5A,ANKFY1,RHOA,NRAS,PRKCD,PRKCA,PIK3R2,PRKD1,HRAS,ARF6,RRAS,RAC1,PRKCG
IL-8 Signaling	1.88E00	3.01E-02	-0.447	45/166 (27%)	0/166 (0%)	35/166 (21%)	86/166 (52%)	IQGAP1,GNA13,ITGAV,MRAS,PLD3,MAPK10,GNG7,GNB1,MAP2K1,ROCK2,PIK3CB,GNAI3,IKBKG,RAC3,GNG4,PRKCB,RHOT1,PIK3C3,MAPK9,PRKCE,EGFR,SRC,CSTB,IKBKB,MYL9,PTK2,GNB2,PRKCD,NRAS,BRAF,GNB5,PTK2B,PIK3R2,RHOB,GNG12,BCL2L1,BAX,GNAI1,ITGAM,GNB4,AKT3,AKT1,RHOC,PIK3R1,LASP1,GNAI2,PIK3CA,GNG3,ROCK1,MAPK8,PRKCI,PRKCZ,MAPK3,FNBP1,KRAS,PAK2,MAP4K4,RHOT2,MTOR,RRAS2,GNB2L1,VASP,AKT2,RHOA,RELA,RHOG,GNG5,GNAS,PRKCA,MAP2K4,M…
Axonal Guidance Signaling	1.86E00	2.14E-02	NaN	96/373 (26%)	1/373 (0%)	72/373 (19%)	204/373 (55%)	SOS2,GNA13,GNA11,PRKAR2B,GNB1,RAP1A,PIK3CB,GNAL,PAK3,ARPC5,CHMP1A,GNAQ,TUBA1A,COPS5,ADAM11,KLC1,PRKCB,PRKAR1B,NCK1,PRKAR2A,PRKCE,GNAZ,HERC2,MYL4,NGEF,MYL6B,DPYSL2,MYL9,Wasl,SRGAP1,PTK2,RTN4,GNB2,PRKAR1A,ARPC2,PRKCD,NRAS,GNB5,RAP1B,BCAR1,TUBA4A,PRKAG1,L1CAM,GNAI1,GNB4,ACTR2,TUBA8,GNAO1,ARHGEF12,NTNG1,MAG,RGS3,TUBB2A,CFL1,FYN,ARHGEF7,PFN1,PTPN11,ITGB1,SEMA7A,PSMD14,NTRK3,PLCB3,GIT1,ROCK1,CRK,PRKCI,…
CCR5 Signaling in Macrophages	1.85E00	5E-02	NaN	22/60 (37%)	0/60 (0%)	10/60 (17%)	28/60 (47%)	GNAI1,MAPK14,GNB4,MRAS,MAPK10,GNG7,GNB1,GNAI3,GNAI2,GNG3,GNG4,PRKCB,MAPK8,PRKCI,PRKCZ,MAPK9,PRKCE,GNB2L1,CAMK4,GNB2,PRKCD,GNG5,GNAS,PRKCA,MAP2K4,PTK2B,GNB5,MAPK1,GNG12,PRKD1,GNG2,PRKCG
Chemokine Signaling	1.85E00	5E-02	NaN	22/60 (37%)	0/60 (0%)	14/60 (23%)	24/60 (40%)	CAMK2B,GNAI1,MAPK14,MRAS,CAMK2D,MAP2K1,ROCK2,GNAI3,MPRIP,GNAQ,GNAI2,CFL1,PLCB3,PRKCB,MAPK8,MAPK3,PLCB1,KRAS,SRC,RRAS2,PPP1R12A,CAMK4,CAMK1D,PTK2,CAMK2A,RHOA,NRAS,PRKCA,PTK2B,CAMK1,CAMK2G,MAP2K2,MAPK1,PPP1CB,HRAS,RRAS
Cytotoxic T Lymphocyte-mediated Apoptosis of Target Cells	1.83E00	9.09E-02	NaN	2/22 (9%)	0/22 (0%)	2/22 (9%)	18/22 (82%)	CASP3,B2M,CYCS,BID
HER-2 Signaling in Breast Cancer	1.81E00	4.84E-02	NaN	21/62 (34%)	0/62 (0%)	14/62 (23%)	27/62 (44%)	GSK3B,SOS2,CDC42,AKT3,AKT1,MRAS,PIK3R1,PIK3CB,PIK3CA,ITGB1,TSC2,GRB2,PRKCB,PRKCI,TSC1,PRKCZ,FOXO1,PIK3C3,PRKCE,KRAS,EGFR,MAP3K5,RRAS2,SOS1,AKT2,BAD,NRAS,PRKCD,PRKCA,PIK3R2,CDKN1B,PRKD1,HRAS,RRAS,PRKCG
VEGF Family Ligand-Receptor Interactions	1.81E00	4.84E-02	NaN	17/62 (27%)	0/62 (0%)	13/62 (21%)	32/62 (52%)	SOS2,AKT3,AKT1,MRAS,PIK3R1,MAP2K1,PIK3CB,PIK3CA,GRB2,PRKCB,PRKCI,PRKCZ,PIK3C3,MAPK3,PRKCE,KRAS,RRAS2,SOS1,AKT2,NRAS,PRKCD,PRKCA,PIK3R2,MAP2K2,MAPK1,PRKD1,PLA2G12A,HRAS,RRAS,PRKCG
Glycine Degradation (Creatine Biosynthesis)	1.77E00	5E-01	NaN	0/2 (0%)	0/2 (0%)	2/2 (100%)	0/2 (0%)	GAMT,GATM
NF-κB Activation by Viruses	1.77E00	4.69E-02	NaN	19/64 (30%)	0/64 (0%)	13/64 (20%)	32/64 (50%)	AKT3,AKT1,ITGAV,MRAS,PIK3R1,PIK3CB,IKBKG,ITGA1,PIK3CA,ITGB1,PRKCB,PRKCI,PRKCZ,PIK3C3,MAPK3,PRKCE,KRAS,RRAS2,ITGA6,IKBKB,IKBKAP,AKT2,RELA,NRAS,PRKCD,PRKCA,PIK3R2,MAPK1,PRKD1,HRAS,RRAS,PRKCG
Aldosterone Signaling in Epithelial Cells	1.74E00	3.36E-02	NaN	42/119 (35%)	0/119 (0%)	32/119 (27%)	45/119 (38%)	HSPA2,HSPA1A/HSPA1B,SOS2,ITPR2,ASIC1,PLCD4,DNAJC5,HSPA13,HSPA12A,MAP2K1,PIK3CB,PIP4K2B,PRKCB,ITPR1,PIP5K1C,PIK3C3,PRKCE,DNAJC6,DNAJB1,CRYAB,HSP90B1,PIP4K2A,DNAJB5,HSPB1,DNAJC8,DNAJC3,PRKCD,PIK3R2,DNAJB11,PDIA3,HSPH1,DNAJC12,HSPD1,DNAJB12,DNAJC2,HSPA4L,PIK3R1,HSPA14,HSPE1,SLC12A2,DNAJC19,PIK3CA,HSPA8,PLCB3,DNAJB6,PRKCI,HSP90AA1,PRKCZ,AHCY,MAPK3,PLCB1,PIP4K2C,KRAS,HSPB11,DNAJC10,HSCB,SLC9A1,PIKFYVE…
LPS-stimulated MAPK Signaling	1.74E00	4.55E-02	NaN	19/66 (29%)	0/66 (0%)	18/66 (27%)	29/66 (44%)	MAPK14,CDC42,CREB1,MRAS,MAPK10,PIK3R1,MAP2K1,PIK3CB,IKBKG,PIK3CA,PRKCB,MAPK8,PRKCI,PRKCZ,PIK3C3,MAPK9,MAPK3,PRKCE,KRAS,MAP3K5,RRAS2,PAK1,IKBKB,RELA,NRAS,PRKCD,PRKCA,MAP2K4,PIK3R2,MAP2K2,MAPK1,PRKD1,MAP2K6,HRAS,RRAS,RAC1,PRKCG
Coagulation System	1.73E00	8E-02	NaN	0/25 (0%)	0/25 (0%)	3/25 (12%)	22/25 (88%)	SERPINF2,PLG,SERPINC1
Dopamine Receptor Signaling	1.69E00	4.35E-02	NaN	30/69 (43%)	0/69 (0%)	13/69 (19%)	26/69 (38%)	Ppp1cc,PPP2R5E,PPP1R14A,COMT,PRKAR2B,DDC,PPP2R4,PPP1R7,PTS,SPR,PRKAG2,PRKACB,QDPR,DRD1,ADCY1,ADCY3,PPP2R5A,NCS1,PPP2CB,PPP2R1A,PRKAR1B,ADCY2,PPP1R1B,PPP2CA,PRKAR2A,MAOA,PPP1R12A,ADCY5,PPP1CA,TH,PPP2R2C,PPP2R2A,PRKAR1A,PPP1R14C,SLC6A3,GNAS,PPP1CB,SLC18A2,PRKAG1,PRKACA,MAOB,ADCY9,PCBD1
Natural Killer Cell Signaling	1.65E00	4.23E-02	NaN	23/71 (32%)	0/71 (0%)	19/71 (27%)	29/71 (41%)	SOS2,AKT3,AKT1,MRAS,PIK3R1,MAP2K1,PIK3CB,PAK3,FYN,OCRL,INPP5B,PIK3CA,PTPN11,RAC3,GRB2,PRKCB,PRKCI,PRKCZ,NCK1,SYNJ1,PIK3C3,MAPK3,VAV3,PRKCE,KRAS,PAK2,RRAS2,INPP5F,PAK1,SOS1,AKT2,NRAS,PRKCD,PRKCA,PIK3R2,MAP2K2,MAPK1,PRKD1,HRAS,RRAS,RAC1,PRKCG
Cardiac Hypertrophy Signaling	1.65E00	2.63E-02	-0.447	64/190 (34%)	0/190 (0%)	40/190 (21%)	86/190 (45%)	GNA13,GNA11,PRKAR2B,MAPK10,GNB1,MAP3K10,PIK3CB,GNAL,ADCY1,GNAQ,RHOT1,PRKAR1B,MAPK9,PRKAR2A,GNAZ,MYL4,MYL6B,MYL9,ADSS,GNB2,PRKAR1A,NRAS,GNB5,MAP3K4,PRKAG1,EIF2B5,GNAI1,GNB4,CREB1,GNAO1,RHOC,PLCB3,CREBBP,ADCY2,ROCK1,FNBP1,MAP3K5,GNB2L1,ADCY5,MYL12A,CAMK4,PPP3CA,SOS1,RHOG,MAP2K2,PLCH2,RPS6KA1,EIF4E,GNG2,PRKACA,HRAS,RRAS,ADCY9,PLCD4,MRAS,GNG7,CHP1,PRKAG2,MAP2K1,PRKACB,ROCK2,GNAI3,ADCY3,GNG4,PIK3C3,CA…
Gαq Signaling	1.61E00	3.08E-02	-1.000	41/130 (32%)	0/130 (0%)	26/130 (20%)	63/130 (48%)	ITPR2,GNA11,MRAS,PLD3,GNG7,CHP1,GNB1,MAP2K1,ROCK2,PIK3CB,IKBKG,GNAQ,GNG4,PRKCB,ITPR1,RHOT1,GRM1,PIK3C3,PRKCE,RGS7,IKBKB,GNB2,PRKCD,PPP3R1,GNB5,GYS1,PTK2B,PIK3R2,RHOB,GNG12,GSK3B,GNB4,AKT3,AKT1,RHOC,PIK3R1,PIK3CA,GNG3,PLCB3,ROCK1,PRKCI,GRM5,PRKCZ,MAPK3,FNBP1,PLCB1,RHOT2,GNB2L1,PPP3CB,CAMK4,PPP3CA,AKT2,RHOA,RELA,RHOG,ADRBK1,GNG5,GNAS,ITPR3,PRKCA,CSK,MAP2K2,MAPK1,PRKD1,GNG2,RHOF,PRKCG
VDR/RXR Activation	1.61E00	4.05E-02	NaN	15/74 (20%)	0/74 (0%)	5/74 (7%)	54/74 (73%)	SERPINB1,PRKCE,NCOR2,NCOA1,MED1,RXRB,PRKCD,PRKCA,CDKN1B,PSMC5,PRKCB,PRKD1,PRKCI,NCOR1,CALB1,PRKCZ,CSNK2A1,NCOA2,FOXO1,PRKCG
UDP-N-acetyl-D-glucosamine Biosynthesis II	1.6E00	3.33E-01	NaN	1/3 (33%)	0/3 (0%)	1/3 (33%)	1/3 (33%)	GFPT1,GNPNAT1
Hypusine Biosynthesis	1.6E00	3.33E-01	NaN	1/3 (33%)	0/3 (0%)	1/3 (33%)	1/3 (33%)	DHPS,EIF5A
Factors Promoting Cardiogenesis in Vertebrates	1.59E00	4E-02	NaN	13/75 (17%)	0/75 (0%)	3/75 (4%)	59/75 (79%)	PRKCE,GSK3B,MAPK14,CTNNB1,SMAD2,SMAD4,APC,BMPR2,PRKCD,PRKCA,PRKCB,PRKD1,LRP1,PRKCI,PRKCZ,PRKCG
ErbB Signaling	1.59E00	4E-02	NaN	25/75 (33%)	0/75 (0%)	19/75 (25%)	31/75 (41%)	GSK3B,SOS2,MAPK14,CDC42,AKT1,MRAS,MAPK10,PIK3R1,MAP2K1,PIK3CB,PAK3,PIK3CA,GRB2,PRKCB,MAPK8,PRKCI,PRKCZ,NCK1,FOXO1,PIK3C3,MAPK9,MAPK3,PRKCE,KRAS,EGFR,PAK2,MTOR,RRAS2,PAK1,SOS1,NRAS,PRKCD,PDPK1,PRKCA,MAP2K4,PIK3R2,NCK2,MAP2K2,MAPK1,PRKD1,MAP2K6,HRAS,RRAS,PRKCG
VEGF Signaling	1.58E00	3.95E-02	NaN	22/76 (29%)	1/76 (1%)	21/76 (28%)	32/76 (42%)	SOS2,AKT3,AKT1,VCL,MRAS,PIK3R1,MAP2K1,ROCK2,YWHAE,PIK3CB,PIK3CA,ACTG1,PTPN11,GRB2,ACTN2,EIF2B1,PRKCB,ROCK1,EIF2B2,ACTN4,FOXO1,PIK3C3,MAPK3,KRAS,SRC,RRAS2,PTK2,SOS1,AKT2,BAD,EIF1AY,NRAS,EIF2S3,PRKCA,PTK2B,PIK3R2,MAP2K2,MAPK1,ELAVL1,BCL2L1,EIF2B4,HRAS,EIF2B5,RRAS
Fcγ Receptor-mediated Phagocytosis in Macrophages and Monocytes	1.56E00	3.9E-02	NaN	25/77 (32%)	1/77 (1%)	21/77 (27%)	30/77 (39%)	CDC42,PTEN,AKT3,ACTR2,AKT1,PLD3,PIK3R1,ARPC5L,TLN2,ARPC1B,ARPC5,FYN,VAMP3,ACTG1,DGKB,RAC3,ARPC4,PRKCB,CRK,PRKCI,PRKCZ,RAB11B,NCK1,MAPK3,ARPC1A,VAV3,PRKCE,SRC,ARPC3,PAK1,VASP,EZR,ACTR3,AKT2,ARPC2,MYO5A,PRKCD,GAB2,PRKCA,PTK2B,PIK3R2,NCK2,MAPK1,PRKD1,ARF6,RAC1,PRKCG
cAMP-mediated signaling	1.53E00	2.45E-02	1.000	55/204 (27%)	0/204 (0%)	20/204 (10%)	129/204 (63%)	CAMK2B,GRM2,PRKAR2B,GABBR1,CNR1,MAP2K1,PRKACB,RAP1A,GNAL,GNAI3,GRM3,ADCY1,STAT3,ADCY3,PDE3A,PDE1C,PRKAR1B,AKAP1,PRKAR2A,PDE12,SRC,AKAP2,RGS7,RAP1GAP,CAMK1D,PKIA,PRKAR1A,AKAP7,GABBR2,BRAF,PPP3R1,ENPP6,RGS14,PDE8B,CAMK2G,LAMTOR3,RGS10,GNAI1,TDP2,AKAP10,PDE4A,CREB1,GNAO1,CAMK2D,PDE10A,DRD1,AKAP12,GNAI2,PDE7B,PDE6D,GRM7,CREBBP,ADCY2,AKAP5,MAPK3,ADCY5,RAPGEF4,PDE1B,AKAP8,PPP3CB,CAMK4,PDE2A,PPP3CA,RGS1…
Endothelin-1 Signaling	1.53E00	2.9E-02	-1.000	41/138 (30%)	0/138 (0%)	26/138 (19%)	71/138 (51%)	ITPR2,PLCD4,GNA13,GNA11,MRAS,GUCY1B3,PLD3,MAPK10,GUCY1A3,PIK3CB,GNAL,GNAI3,PRDX6,ADCY1,GNAQ,ADCY3,PRKCB,ITPR1,PIK3C3,MAPK9,PRKCE,GNAZ,SRC,PRKCD,NRAS,BRAF,PIK3R2,CASP3,PDIA3,GNAI1,MAPK14,GNAO1,PLA2G16,PIK3R1,GAB1,GNAI2,NOS1,PIK3CA,PLCB3,GRB2,ADCY2,PNPLA8,MAPK8,PRKCI,PRKCZ,PTGS1,MAPK3,PLCB1,KRAS,RRAS2,ADCY5,SOS1,SHC3,GNAS,ITPR3,PRKCA,MAPK1,PLCH2,PRKD1,PLA2G12A,PLCL2,ARAF,ABHD3,HRAS,RRAS,ADCY9,PRKCG
Apoptosis Signaling	1.52E00	3.75E-02	NaN	22/80 (28%)	0/80 (0%)	19/80 (24%)	39/80 (49%)	MAP2K7,MRAS,MAP2K1,CYCS,LMNA,IKBKG,ROCK1,MAPK8,CAPNS1,CAPN7,MAPK3,CAPN2,PRKCE,KRAS,MAP4K4,MAP3K5,RRAS2,HTRA2,CAPN1,IKBKB,ACIN1,BAD,RELA,NRAS,PRKCA,CAPN5,MAP2K4,ENDOG,BIRC6,MAP2K2,MAPK1,RPS6KA1,CASP3,AIFM1,BAX,BCL2L1,HRAS,BID,RRAS,DIABLO,SPTAN1
Docosahexaenoic Acid (DHA) Signaling	1.5E00	6.06E-02	NaN	10/33 (30%)	0/33 (0%)	9/33 (27%)	14/33 (42%)	GSK3B,AKT3,AKT1,SERPINF1,APP,PIK3R1,CYCS,PIK3CB,AKT2,BAD,PDPK1,PIK3CA,PIK3R2,CASP3,BAX,BCL2L1,BID,FOXO1,PIK3C3
FXR/RXR Activation	1.45E00	3.53E-02	NaN	10/85 (12%)	0/85 (0%)	15/85 (18%)	60/85 (71%)	AKT3,TF,AKT1,SERPINF1,VLDLR,G6PC3,MAPK10,FASN,ABCB11,C4A/C4B,SERPINF2,CREBBP,MAPK8,FOXO1,MAPK9,PCK2,APOD,PCYOX1,AKT2,IL18,MAP2K4,CLU,APOE,MTTP,TTR
LXR/RXR Activation	1.44E00	3.49E-02	NaN	5/86 (6%)	0/86 (0%)	13/86 (15%)	68/86 (79%)	NCOR2,TF,SERPINF1,APOD,FASN,PCYOX1,RXRB,HADH,RELA,C4A/C4B,IL18,CLU,SERPINF2,CYP51A1,APOE,NCOR1,ACACA,TTR
Fc Epsilon RI Signaling	1.43E00	3.45E-02	NaN	28/87 (32%)	0/87 (0%)	20/87 (23%)	39/87 (45%)	MAP2K7,SOS2,MAPK14,AKT3,AKT1,MRAS,MAPK10,PIK3R1,MAP2K1,GAB1,PIK3CB,FYN,OCRL,INPP5B,PIK3CA,PTPN11,RAC3,GRB2,PRKCB,MAPK8,PRKCI,PRKCZ,SYNJ1,PIK3C3,MAPK9,MAPK3,VAV3,PRKCE,KRAS,RRAS2,INPP5F,SOS1,AKT2,NRAS,PRKCD,PDPK1,PRKCA,MAP2K4,PIK3R2,MAP2K2,MAPK1,PRKD1,PLA2G12A,MAP2K6,HRAS,RRAS,RAC1,PRKCG
Calcium Signaling	1.42E00	2.67E-02	NaN	44/150 (29%)	0/150 (0%)	29/150 (19%)	77/150 (51%)	CAMK2B,ITPR2,ATP2B3,PRKAR2B,CHP1,MICU1,PRKAG2,PRKACB,RAP1A,MYH9,RYR3,ATP2B2,MYH14,Tpm4,RYR1,ATP2C1,MYH11,ITPR1,PRKAR1B,HDAC1,RAP2A,PRKAR2A,HDAC5,MYL4,RCAN1,MYL6B,CAMK1D,ATP2A2,MYL9,CAMKK1,HDAC3,RCAN2,PRKAR1A,CALR,PPP3R1,CAMK2G,RAP1B,PRKAG1,CREB1,SLC8A1,CAMK2D,GRIN1,GRIA3,MYH4,GRIA2,Tpm1,CREBBP,RAP2B,NFAT5,CAMKK2,HDAC4,PNCK,AKAP5,MAPK3,HDAC2,GRIA1,PPP3CB,CAMK4,MYH10,ATP2B1,PPP3CA,CAMK2A,GRIN2B,TPM…
CDK5 Signaling	1.4E00	3.37E-02	NaN	36/89 (40%)	0/89 (0%)	18/89 (20%)	35/89 (39%)	PPP2R5E,PRKAR2B,MRAS,LAMB1,PPP2R4,MAPK10,LAMC1,PRKAG2,MAP2K1,PRKACB,GNAL,ADCY1,ADCY3,PPP2R5A,PPP2CB,PRKAR1B,PPP1R1B,MAPK9,PRKAR2A,PPP2R2C,CDK5,PRKAR1A,NRAS,PPP1CB,PRKAG1,Ppp1cc,PPP1R14A,MAPK14,PPP1R7,DRD1,ITGB1,PPP2R1A,ADCY2,MAPT,MAPK8,NTRK2,PPP2CA,MAPK3,KRAS,RRAS2,ADCY5,PPP1R12A,CAPN1,PPP1CA,ITGA6,PPP2R2A,PPP1R14C,GNAS,MAP2K2,MAPK1,PRKACA,HRAS,RRAS,ADCY9
OX40 Signaling Pathway	1.39E00	5.26E-02	NaN	1/38 (3%)	0/38 (0%)	6/38 (16%)	31/38 (82%)	MAP2K4,MAPK10,B2M,BCL2L1,MAPK8,MAPK9,RELA
mTOR Signaling	1.38E00	2.6E-02	NaN	45/154 (29%)	0/154 (0%)	56/154 (36%)	53/154 (34%)	PPP2R5E,EIF3G,PPP2R4,EIF4B,RPS24,RPS5,PIK3CB,RPS19,PPP2R5A,EIF3E,PRKCB,RHOT1,PRKCE,AKT1S1,RPS18,PRKCD,NRAS,EIF3H,EIF3K,RPS27A,PRKAG1,RICTOR,FKBP1A,RHOC,EIF4A2,EIF3B,EIF3I,RPS20,STK11,RPS4Y1,DGKZ,PRKCI,TSC1,PRKCZ,RPS21,EIF3J,EIF4G1,PPP2CA,FNBP1,RPS2,PPP2R2A,RPS14,RHOG,PRKCA,RPS17,RPS6KA1,PRKD1,RPS28,RHEB,EIF4E,HRAS,RRAS,RAC1,PRKCG,PLD3,MRAS,PRKAA1,PRKAG2,RPS6KA5,TSC2,PPP2CB,MLST8,PIK3C3,EIF3A,RPS7…
Amyotrophic Lateral Sclerosis Signaling	1.38E00	3.3E-02	NaN	19/91 (21%)	0/91 (0%)	23/91 (25%)	49/91 (54%)	GLUL,AKT3,GPX1,PIK3R1,CYCS,PIK3CB,NEFL,GRIN1,RAB5C,GRIA3,NOS1,PIK3CA,GRIA2,CAT,GRIK3,PIK3C3,CAPNS1,CAPN7,CAPN2,ALS2,CACNA1E,GRIA1,PAK1,GRIK2,CAPN1,RAB5A,SOD1,SLC1A2,PPP3CA,SSR4,HECW1,GRIN2B,NEFH,RAB5B,CAPN5,PIK3R2,CACNA1C,CASP3,BAX,BCL2L1,BID,RAC1
HGF Signaling	1.38E00	3.3E-02	NaN	28/91 (31%)	0/91 (0%)	21/91 (23%)	42/91 (46%)	SOS2,CDC42,MRAS,MAPK10,MAP3K10,MAP2K1,RAP1A,PIK3CB,STAT3,PRKCB,PIK3C3,MAPK9,PRKCE,CRKL,PTK2,PRKCD,NRAS,PIK3R2,RAP1B,MAP3K4,MAP2K7,AKT3,AKT1,PIK3R1,GAB1,PIK3CA,PTPN11,ITGB1,GRB2,MAPK8,PRKCI,PRKCZ,MAPK3,Map3k7,KRAS,MAP3K5,RRAS2,PAK1,AKT2,SOS1,PRKCA,MAP2K4,MAP2K2,MAPK1,PRKD1,HRAS,RRAS,RAC1,PRKCG
Role of Tissue Factor in Cancer	1.36E00	3.23E-02	NaN	27/93 (29%)	0/93 (0%)	21/93 (23%)	45/93 (48%)	MAPK14,CDC42,GNA11,PTEN,AKT3,GNA13,AKT1,ITGAV,MRAS,PIK3R1,PIK3CB,ARRB1,RPS6KA5,GNAQ,FYN,CFL1,PIK3CA,PTPN11,ITGB1,PIK3C3,MAPK3,PLCB1,KRAS,EGFR,MTOR,SRC,RRAS2,RPS6KA3,PAK1,ITGA6,AKT2,CFL2,NRAS,PDXP,PRKCA,PTK2B,RPS6KA2,PIK3R2,MAPK1,RPS6KA1,CASP3,EIF4E,BCL2L1,STAT5B,HRAS,RRAS,RAC1,P4HB
14-3-3-mediated Signaling	1.34E00	3.19E-02	NaN	34/94 (36%)	1/94 (1%)	36/94 (38%)	23/94 (24%)	PLCD4,TUBB3,MRAS,MAPK10,TUBG1,MAP2K1,YWHAE,PIK3CB,SNCA,TUBA1A,TSC2,PRKCB,PIK3C3,MAPK9,PRKCE,AKT1S1,SRC,YWHAG,BAD,TUBB4B,PRKCD,NRAS,PIK3R2,CDKN1B,PDIA3,TUBA4A,BAX,YWHAZ,GSK3B,YWHAQ,AKT3,AKT1,TUBA8,TUBB6,PIK3R1,YWHAH,TUBB2A,VIM,PIK3CA,STK11,PLCB3,GRB2,MAPT,MAPK8,PRKCI,TSC1,PRKCZ,YWHAB,FOXO1,MAPK3,PLCB1,KRAS,MAP3K5,RRAS2,TUBB,AKT2,GFAP,TUBB4A,PRKCA,MAP2K4,MAP2K2,MAPK1,PLCH2,RPS6KA1,PRKD1,PLCL2,SRPK2…
Cdc42 Signaling	1.31E00	3.09E-02	NaN	22/97 (23%)	0/97 (0%)	27/97 (28%)	48/97 (49%)	EXOC2,CDC42BPA,IQGAP1,CDC42,EXOC4,MAPK10,ARPC1B,MPRIP,PAK3,ARPC5,EXOC1,MAPK9,ARPC1A,MYL4,SRC,ARPC3,EXOC8,MYL6B,MYL9,EXOC3,CFL2,ARPC2,MYLK,PPP1CB,GSK3B,MAPK14,ACTR2,ARPC5L,APC,EXOC6,LLGL1,CFL1,CLIP1,ITGB1,ARPC4,MAPK8,PRKCI,PRKCZ,DIAPH1,PAK2,PPP1R12A,PAK1,MYL12A,B2M,ACTR3,BAIAP2,MAP2K4,RALA,MAPK1
fMLP Signaling in Neutrophils	1.3E00	3.06E-02	NaN	35/98 (36%)	0/98 (0%)	26/98 (27%)	37/98 (38%)	ITPR2,CDC42,MRAS,GNG7,CHP1,GNB1,MAP2K1,PIK3CB,ARPC1B,GNAI3,ARPC5,GNG4,PRKCB,ITPR1,PIK3C3,ARPC1A,PRKCE,ARPC3,GNB2,ARPC2,PRKCD,NRAS,PPP3R1,GNB5,PIK3R2,GNG12,GNAI1,GNB4,ACTR2,PIK3R1,ARPC5L,GNAI2,PIK3CA,GNG3,ARPC4,PLCB3,NFAT5,PRKCI,PRKCZ,MAPK3,PLCB1,KRAS,RRAS2,GNB2L1,PPP3CB,CAMK4,PPP3CA,ACTR3,RELA,GNG5,GNAS,ITPR3,PRKCA,MAP2K2,MAPK1,PRKD1,GNG2,HRAS,RRAS,RAC1,PRKCG
IL-12 Signaling and Production in Macrophages	1.29E00	3.03E-02	NaN	22/99 (22%)	0/99 (0%)	15/99 (15%)	62/99 (63%)	MAPK14,AKT3,AKT1,MYD88,MAPK10,PIK3R1,MAP2K1,PIK3CB,IKBKG,RAB7A,PIK3CA,STAT1,PRKCB,MAPK8,PRKCI,PRKCZ,PIK3C3,MAPK9,MAPK3,PRKCE,NCOA1,APOD,IKBKB,PCYOX1,AKT2,RELA,IL18,PRKCD,PRKCA,MAP2K4,PIK3R2,CLU,MAP2K2,MAPK1,PRKD1,APOE,PRKCG
Role of Pattern Recognition Receptors in Recognition of Bacteria and Viruses	1.29E00	3.03E-02	NaN	14/99 (14%)	0/99 (0%)	11/99 (11%)	74/99 (75%)	CREB1,MYD88,MAPK10,PIK3R1,PIK3CB,C1QA,PIK3CA,PRKCB,MAPK8,PRKCI,PRKCZ,PIK3C3,MAPK9,MAPK3,PRKCE,C1QB,RELA,IL18,PRKCD,PRKCA,MAP2K4,PIK3R2,MAPK1,PRKD1,PRKCG
p70S6K Signaling	1.29E00	3.03E-02	NaN	37/99 (37%)	0/99 (0%)	24/99 (24%)	38/99 (38%)	PPP2R5E,SOS2,PLCD4,MRAS,PPP2R4,MAP2K1,YWHAE,PIK3CB,EEF2,GNAI3,GNAQ,PPP2R5A,PPP2CB,PRKCB,PIK3C3,PRKCE,EGFR,SRC,YWHAG,PPP2R2C,BAD,PRKCD,NRAS,PIK3R2,PDIA3,YWHAZ,GNAI1,YWHAQ,AKT3,AKT1,PIK3R1,YWHAH,GNAI2,PIK3CA,PPP2R1A,PLCB3,GRB2,MAPT,PRKCI,PRKCZ,YWHAB,PPP2CA,MAPK3,PLCB1,KRAS,MTOR,RRAS2,AKT2,PPP2R2A,SOS1,PDPK1,PRKCA,MAP2K2,MAPK1,PLCH2,PRKD1,PLCL2,HRAS,RRAS,BCAP31,PRKCG
CCR3 Signaling in Eosinophils	1.28E00	3E-02	NaN	34/100 (34%)	0/100 (0%)	25/100 (25%)	41/100 (41%)	ITPR2,MRAS,GNG7,GNB1,MAP2K1,ROCK2,PIK3CB,GNAI3,MPRIP,PAK3,GNG4,PRKCB,ITPR1,PIK3C3,PRKCE,CFL2,GNB2,PRKCD,NRAS,GNB5,PIK3R2,MYLK,GNG12,PPP1CB,GNAI1,MAPK14,GNB4,PIK3R1,GNAI2,CFL1,PIK3CA,GNG3,PLCB3,ROCK1,PRKCI,PRKCZ,MAPK3,PLCB1,KRAS,PAK2,RRAS2,GNB2L1,PPP1R12A,PAK1,CAMK4,RHOA,GNG5,GNAS,ITPR3,PRKCA,MAP2K2,MAPK1,PRKD1,PLA2G12A,GNG2,HRAS,RRAS,RAC1,PRKCG
CD27 Signaling in Lymphocytes	1.27E00	4.55E-02	NaN	15/44 (34%)	0/44 (0%)	6/44 (14%)	23/44 (52%)	Map3k7,MAP2K5,MAP2K7,MAP3K5,MAPK10,MAP3K10,IKBKB,IKBKAP,CYCS,MAP2K1,RELA,IKBKG,MAP2K4,MAP2K2,CASP3,MAPK8,BCL2L1,MAP3K4,MAP2K6,BID,MAPK9
RhoA Signaling	1.26E00	2.94E-02	NaN	38/102 (37%)	1/102 (1%)	22/102 (22%)	41/102 (40%)	GNA13,ROCK2,ARPC1B,MPRIP,ARPC5,ACTG1,PIP4K2B,SEPT3,PIP5K1C,RTKN,RAPGEF2,ARPC1A,SEPT8,PLEKHG5,MYL4,ARPC3,ARHGAP5,EZR,NGEF,MYL6B,MYL9,PTK2,CFL2,PIP4K2A,ARPC2,PLXNA1,SEPT7,PTK2B,MYLK,PPP1CB,ACTR2,PKN1,ARHGEF12,ARPC5L,WASF1,SEPT5,CFL1,PFN1,SEPT11,ARPC4,ROCK1,ANLN,PIP4K2C,CDC42EP4,PPP1R12A,ARHGAP35,MYL12A,MSN,PIKFYVE,SEPT6,ACTR3,SEPT2,RDX,RHOA,BAIAP2,SEPT4,ARHGEF1,CIT,SEPT9,TTN,PFN2
Semaphorin Signaling in Neurons	1.19E00	4.08E-02	NaN	10/49 (20%)	0/49 (0%)	22/49 (45%)	17/49 (35%)	SEMA4D,ARHGEF12,RHOC,CRMP1,ROCK2,DPYSL5,PLXNB1,DPYSL4,PAK3,FYN,CFL1,ITGB1,SEMA7A,RHOT1,ROCK1,MAPK3,FNBP1,PAK2,RHOT2,PAK1,DPYSL2,CDK5,PTK2,CFL2,RHOA,RHOG,PLXNA1,RHOB,DPYSL3,MAPK1,RHOF,RAC1
Ketogenesis	1.18E00	1.25E-01	NaN	4/8 (50%)	0/8 (0%)	3/8 (38%)	1/8 (13%)	HMGCS2,HMGCS1,ACAT2,BDH1,ACAT1,HMGCL,HADHB
Leucine Degradation I	1.18E00	1.25E-01	NaN	3/8 (38%)	0/8 (0%)	4/8 (50%)	1/8 (13%)	BCAT1,AUH,MCCC2,BCAT2,HMGCL,MCCC1,ACADM
Synaptic Long Term Depression	1.15E00	2.65E-02	NaN	43/113 (38%)	0/113 (0%)	21/113 (19%)	49/113 (43%)	PPP2R5E,ITPR2,GRM2,PLCD4,GNA13,GNA11,MRAS,GUCY1B3,PPP2R4,GUCY1A3,MAP2K1,GNAL,GNAI3,GRM3,PRDX6,RYR3,GNAQ,PPP2R5A,RYR1,PPP2CB,PRKCB,ITPR1,GRM1,PRKCE,GNAZ,PPP2R2C,PRKCD,NRAS,PDIA3,GNAI1,GNAO1,PLA2G16,GNAI2,GRIA3,NOS1,GRIA2,GRM7,PPP2R1A,PLCB3,PNPLA8,PRKCI,GRM5,PRKCZ,PPP2CA,MAPK3,PLCB1,KRAS,RRAS2,GRIA1,PPP2R2A,GNAS,ITPR3,PRKCA,MAP2K2,MAPK1,PLCH2,PRKD1,PLA2G12A,PLCL2,ABHD3,HRAS,RRAS,RYR2,PRKCG
Isoleucine Degradation I	1.13E00	1.11E-01	NaN	2/9 (22%)	0/9 (0%)	7/9 (78%)	0/9 (0%)	BCAT1,HSD17B10,AUH,DLD,ACAD8,ACAT2,BCAT2,ACAT1,HADHB
PXR/RXR Activation	1.13E00	3.77E-02	NaN	19/53 (36%)	0/53 (0%)	6/53 (11%)	28/53 (53%)	HMGCS2,ABCB1,AKT3,AKT1,PRKAR2B,CPT1A,PRKAG2,PRKACB,ALDH3A2,ABCB11,GSTM1,ALDH1A1,GSTM2,PRKAR1B,FOXO1,PRKAR2A,PCK2,NCOA1,ABCB9,AKT2,RELA,PRKAR1A,NR3C1,PRKAG1,PRKACA
Gαi Signaling	1.12E00	2.56E-02	NaN	43/117 (37%)	0/117 (0%)	13/117 (11%)	61/117 (52%)	SOS2,GRM2,PRKAR2B,MRAS,GABBR1,CNR1,GNG7,GNB1,PRKAG2,PRKACB,RAP1A,GNAI3,GRM3,ADCY1,RALB,STAT3,ADCY3,GNG4,PRKAR1B,PRKAR2A,SRC,RGS7,RAP1GAP,GNB2,PRKAR1A,NRAS,GABBR2,GNB5,RGS14,GNG12,RGS10,PRKAG1,GNAI1,GNB4,GNAI2,GNG3,GRM7,GRB2,ADCY2,MAPK3,KRAS,RRAS2,GNB2L1,ADCY5,RGS12,SOS1,CAV1,GNG5,GNAS,RALA,MAPK1,GNG2,PRKACA,HRAS,RRAS,ADCY9
Induction of Apoptosis by HIV1	1.1E00	3.64E-02	NaN	10/55 (18%)	0/55 (0%)	10/55 (18%)	35/55 (64%)	MAP2K7,MAP3K5,MAPK10,HTRA2,IKBKB,IKBKAP,CYCS,SLC25A3,RELA,IKBKG,SLC25A5,MAP2K4,SLC25A4,CASP3,MAPK8,BAX,BCL2L1,BID,MAPK9,DIABLO
Cleavage and Polyadenylation of Pre-mRNA	1.09E00	1E-01	NaN	7/10 (70%)	0/10 (0%)	3/10 (30%)	0/10 (0%)	CSTF3,WDR33,PAPOLA,CSTF2,CPSF3,CPSF1,CPSF6,PABPN1,CPSF2,NUDT21
Extrinsic Prothrombin Activation Pathway	1.09E00	1E-01	NaN	0/10 (0%)	0/10 (0%)	1/10 (10%)	9/10 (90%)	SERPINC1
Fatty Acid Activation	1.09E00	1E-01	NaN	1/10 (10%)	0/10 (0%)	7/10 (70%)	2/10 (20%)	ACSL4,SLC27A1,ACSL1,ACSL5,ACSL3,ACSBG1,SLC27A4,ACSL6
Mevalonate Pathway I	1.09E00	1E-01	NaN	3/10 (30%)	0/10 (0%)	6/10 (60%)	1/10 (10%)	PMVK,HMGCS2,HMGCS1,IDI1,MVK,ACAT2,ACAT1,MVD,HADHB
IL-15 Signaling	1.08E00	3.51E-02	NaN	14/57 (25%)	0/57 (0%)	11/57 (19%)	32/57 (56%)	MAPK14,AKT3,AKT1,MRAS,PIK3R1,MAP2K1,PIK3CB,STAT3,PIK3CA,RAC3,PIK3C3,MAPK3,KRAS,RRAS2,PTK2,AKT2,RELA,NRAS,PIK3R2,MAP2K2,MAPK1,BCL2L1,STAT5B,HRAS,RRAS
GPCR-Mediated Integration of Enteroendocrine Signaling Exemplified by an L Cell	1.04E00	3.33E-02	NaN	25/60 (42%)	0/60 (0%)	3/60 (5%)	32/60 (53%)	GNAI1,PLCD4,ITPR2,GNA11,PRKAR2B,PRKAG2,PRKACB,GNAI3,ADCY1,GNAQ,GNAI2,ADCY3,PLCB3,PRKAR1B,ADCY2,ITPR1,PRKAR2A,PLCB1,ADCY5,PRKAR1A,GNAS,ITPR3,PLCH2,PDIA3,PLCL2,PRKAG1,PRKACA,ADCY9
Caveolar-mediated Endocytosis Signaling	1.03E00	3.28E-02	NaN	18/61 (30%)	1/61 (2%)	10/61 (16%)	32/61 (52%)	FLNB,FLOT1,ITGAM,ITGAV,COPG1,FLOT2,RAB5C,ITGA1,FYN,ACTG1,COPG2,ITGB1,COPZ1,EGFR,SRC,ITSN1,COPB2,FLNA,RAB5A,ITGA6,B2M,CAV1,RAB5B,PRKCA,COPA,DNM2,COPE,COPB1,ARCN1
Leptin Signaling in Obesity	1.03E00	3.28E-02	NaN	31/61 (51%)	0/61 (0%)	6/61 (10%)	24/61 (39%)	PLCD4,AKT3,AKT1,PRKAR2B,PRKAG2,PIK3R1,MAP2K1,PRKACB,PIK3CB,ADCY1,STAT3,PIK3CA,ADCY3,PTPN11,GRB2,PLCB3,PDE3A,PRKAR1B,ADCY2,FOXO1,PIK3C3,MAPK3,PRKAR2A,PLCB1,ADCY5,AKT2,PRKAR1A,GNAS,PIK3R2,MAP2K2,MAPK1,PLCH2,PDIA3,PLCL2,PRKAG1,PRKACA,ADCY9
JAK/Stat Signaling	1.03E00	3.28E-02	NaN	18/61 (30%)	0/61 (0%)	11/61 (18%)	32/61 (52%)	SOS2,AKT3,AKT1,MRAS,PIK3R1,MAP2K1,PIK3CB,GNAQ,STAT3,PIK3CA,STAT1,PTPN11,GRB2,PIK3C3,MAPK3,KRAS,MTOR,RRAS2,SOS1,AKT2,RELA,NRAS,PIK3R2,MAP2K2,MAPK1,BCL2L1,STAT5B,HRAS,RRAS
Chondroitin Sulfate Degradation (Metazoa)	1.01E00	8.33E-02	NaN	1/12 (8%)	0/12 (0%)	5/12 (42%)	6/12 (50%)	HEXB,GALNS,GM2A,HEXA,ARSB,MGEA5
Dermatan Sulfate Degradation (Metazoa)	1.01E00	8.33E-02	NaN	1/12 (8%)	0/12 (0%)	3/12 (25%)	8/12 (67%)	HEXB,GM2A,HEXA,MGEA5
Valine Degradation I	1.01E00	8.33E-02	NaN	3/12 (25%)	0/12 (0%)	9/12 (75%)	0/12 (0%)	BCAT1,HIBCH,BCKDHA,HIBADH,AUH,DLD,ACAD8,ALDH6A1,BCAT2,BCKDHB,ABAT,HADHB
Superpathway of Geranylgeranyldiphosphate Biosynthesis I (via Mevalonate)	1.01E00	8.33E-02	NaN	3/12 (25%)	0/12 (0%)	8/12 (67%)	1/12 (8%)	PMVK,HMGCS2,HMGCS1,IDI1,MVK,FDPS,ACAT2,ACAT1,GGPS1,MVD,HADHB
Small Cell Lung Cancer Signaling	1E00	3.17E-02	NaN	13/63 (21%)	0/63 (0%)	9/63 (14%)	41/63 (65%)	FHIT,PTEN,AKT3,AKT1,IKBKB,RXRB,PIK3R1,CYCS,PTK2,PIK3CB,AKT2,RELA,IKBKG,NOS1,PIK3CA,CDKN1B,PIK3R2,SIN3A,PA2G4,BCL2L1,BID,PIK3C3
Colorectal Cancer Metastasis Signaling	9.96E-01	1.91E-02	0.000	50/209 (24%)	0/209 (0%)	29/209 (14%)	130/209 (62%)	SOS2,PRKAR2B,MRAS,MAPK10,GNG7,GNB1,PRKAG2,SMAD4,MAP2K1,PRKACB,PIK3CB,ADCY1,STAT3,ADCY3,GNG4,RHOT1,PRKAR1B,LRP1,PIK3C3,MAPK9,PRKAR2A,EGFR,SRC,CTNNB1,SMAD2,BAD,GNB2,PRKAR1A,APPL1,NRAS,BRAF,GNB5,PIK3R2,RHOB,GNG12,CASP3,BCL2L1,BAX,PRKAG1,GSK3B,GNB4,AKT3,AKT1,RHOC,PIK3R1,APC,ARRB1,PIK3CA,GNG3,STAT1,GRB2,ADCY2,MAPK8,MAPK3,FNBP1,KRAS,RHOT2,RRAS2,GNB2L1,ADCY5,AKT2,SOS1,RHOA,RELA,RHOG,ADRBK1,GNG5,GNAS,MAP…
γ-linolenate Biosynthesis II (Animals)	9.81E-01	7.69E-02	NaN	1/13 (8%)	0/13 (0%)	9/13 (69%)	3/13 (23%)	ACSL4,SLC27A1,ACSL1,CYB5A,ACSL5,ACSL3,ACSBG1,SLC27A4,FADS1,ACSL6
PDGF Signaling	9.69E-01	3.03E-02	NaN	23/66 (35%)	0/66 (0%)	14/66 (21%)	29/66 (44%)	SOS2,MRAS,CSNK2A2,PIK3R1,MAP2K1,PIK3CB,STAT3,OCRL,INPP5B,PIK3CA,STAT1,SPHK2,GRB2,PRKCB,CRK,MAPK8,SYNJ1,PIK3C3,MAPK3,KRAS,SRC,RRAS2,INPP5F,CSNK2B,CRKL,SOS1,CAV1,NRAS,ACP1,PRKCA,MAP2K4,PIK3R2,MAP2K2,MAPK1,HRAS,CSNK2A1,RRAS
Tight Junction Signaling	9.66E-01	2.21E-02	NaN	50/136 (37%)	1/136 (1%)	26/136 (19%)	59/136 (43%)	PPP2R5E,CDC42,PTEN,VCL,CASK,PRKAR2B,CPSF3,PPP2R4,PRKAG2,PRKACB,MYH9,CSTF3,MYH14,ACTG1,PPP2R5A,CPSF1,MYH11,PPP2CB,PRKAR1B,GOSR2,CPSF2,PRKAR2A,MYL4,CTNNB1,TIAM1,MYL6B,MYL9,PPP2R2C,NSF,CPSF6,PRKAR1A,GPAA1,CLDN11,ARHGEF2,MYLK,PRKAG1,SPTAN1,AKT3,MLLT4,AKT1,TJP1,SNAP25,NAPA,GOSR1,YKT6,MPDZ,STX16,MAGI2,LLGL1,VTI1A,EPB41,MYH4,VAMP3,PPP2R1A,PRKCI,SAFB,PRKCZ,SMURF1,PPP2CA,NUDT21,CTNNA1,CSTF2,MARK2,VASP,TJP…
Glutathione Redox Reactions I	9.5E-01	7.14E-02	NaN	1/14 (7%)	0/14 (0%)	10/14 (71%)	3/14 (21%)	PRDX6,GSTZ1,GPX3,GSTT2/GSTT2B,GPX4,GSR,GPX1,GSTK1,MGST1,Gstt1,MGST3
Mitochondrial L-carnitine Shuttle Pathway	9.5E-01	7.14E-02	NaN	2/14 (14%)	0/14 (0%)	9/14 (64%)	3/14 (21%)	ACSL4,SLC27A1,ACSL1,ACSL5,CPT1C,ACSL3,CPT1A,ACSBG1,CPT2,SLC27A4,ACSL6
UVA-Induced MAPK Signaling	9.48E-01	2.94E-02	NaN	21/68 (31%)	0/68 (0%)	17/68 (25%)	30/68 (44%)	PLCD4,MAPK14,MRAS,MAPK10,PIK3R1,CYCS,PIK3CB,RPS6KA5,PIK3CA,STAT1,PLCB3,MAPK8,PIK3C3,MAPK9,MAPK3,PLCB1,KRAS,EGFR,MTOR,RRAS2,SMPD3,RPS6KA3,SMPD1,NRAS,PRKCA,MAP2K4,RPS6KA2,PIK3R2,MAPK1,PLCH2,RPS6KA1,PDIA3,CASP3,PLCL2,BCL2L1,HRAS,SMPD4,RRAS
B Cell Receptor Signaling	9.38E-01	2.14E-02	NaN	42/140 (30%)	0/140 (0%)	30/140 (21%)	68/140 (49%)	CAMK2B,SOS2,CDC42,PTEN,MRAS,MAP3K10,MAP2K1,RAP1A,PIK3CB,IKBKG,OCRL,INPP5B,PRKCB,PIK3C3,MAPK9,RAP2A,IKBKB,PTK2,BAD,CFL2,NRAS,PPP3R1,PTK2B,PIK3R2,CAMK2G,RAP1B,BCL2L1,MAP3K4,MAP2K6,GSK3B,MAP2K7,MAPK14,AKT3,AKT1,CREB1,CAMK2D,PIK3R1,GAB1,CFL1,PIK3CA,PTPN11,GRB2,CREBBP,RAP2B,NFAT5,MAPK8,SYNJ1,FOXO1,MAPK3,VAV3,Map3k7,KRAS,MAP3K5,MTOR,INPP5F,RRAS2,PPP3CB,CAMK4,PPP3CA,AKT2,SOS1,CAMK2A,RELA,PDPK1,GAB2,MAP2…
Granzyme B Signaling	9.22E-01	6.67E-02	NaN	4/15 (27%)	0/15 (0%)	2/15 (13%)	9/15 (60%)	LMNB1,ENDOG,CASP3,CYCS,LMNB2,BID
Melanocyte Development and Pigmentation Signaling	9.17E-01	2.82E-02	NaN	29/71 (41%)	0/71 (0%)	12/71 (17%)	30/71 (42%)	SOS2,CREB1,PRKAR2B,MRAS,PRKAG2,PIK3R1,MAP2K1,PRKACB,PIK3CB,ADCY1,RPS6KA5,PIK3CA,ADCY3,PTPN11,GRB2,PRKAR1B,ADCY2,CREBBP,CRK,PIK3C3,MAPK3,PRKAR2A,KRAS,SRC,RRAS2,ADCY5,RPS6KA3,SOS1,PRKAR1A,NRAS,GNAS,RPS6KA2,PIK3R2,MAP2K2,MAPK1,RPS6KA1,PRKAG1,PRKACA,HRAS,RRAS,ADCY9
Regulation of Actin-based Motility by Rho	8.97E-01	2.74E-02	NaN	13/73 (18%)	0/73 (0%)	33/73 (45%)	27/73 (37%)	CDC42,ACTR2,RHOC,ARPC5L,ARPC1B,WASF1,MPRIP,PAK3,ARPC5,CFL1,PFN1,PIP4K2B,ITGB1,RAC3,ARPC4,ARHGDIA,RHOT1,ROCK1,PIP5K1C,ARPC1A,FNBP1,PIP4K2C,PAK2,RHOT2,MYL4,ARPC3,PPP1R12A,PAK1,MYL12A,MYL6B,Wasl,PIKFYVE,MYL9,ACTR3,PIP4K2A,RHOA,RHOG,BAIAP2,ARPC2,GSN,RHOB,MYLK,PPP1CB,RHOF,PFN2,RAC1
Lipid Antigen Presentation by CD1	8.96E-01	6.25E-02	NaN	5/16 (31%)	0/16 (0%)	6/16 (38%)	5/16 (31%)	CALR,AP2A2,AP2A1,PDIA3,CANX,PSAP,B2M,AP2S1,AP2M1,ARF6,AP1B1
NRF2-mediated Oxidative Stress Response	8.79E-01	2.01E-02	NaN	47/149 (32%)	1/149 (1%)	46/149 (31%)	55/149 (37%)	SQSTM1,MAP2K5,FTL,MRAS,DNAJC5,UBE2E3,NQO2,MAP2K1,PRDX1,PIK3CB,GSTO1,ACTG1,CCT7,GSR,CAT,GSTM2,AOX1,PRKCB,MGST3,PIK3C3,MAPK9,DNAJA4,PRKCE,DNAJC6,GSTT2/GSTT2B,USP14,DNAJB1,GSTM3,SOD1,MGST1,DNAJB5,SOD2,DNAJC8,DNAJC3,PRKCD,SOD3,NRAS,DNAJA3,PIK3R2,DNAJB11,EPHX1,VCP,MAP2K6,GSK3B,MAP2K7,HACD3,MAPK14,AKT1,FMO1,DNAJB12,PIK3R1,NQO1,STIP1,DNAJC19,FKBP5,GSTM1,PIK3CA,GSTM5,CDC34,CREBBP,DNAJB6,MAPK8,PRKCI,GSTP1…
RhoGDI Signaling	8.79E-01	2.01E-02	NaN	51/149 (34%)	1/149 (1%)	34/149 (23%)	63/149 (42%)	CDH2,CDC42,GNA13,GNA11,MRAS,GNG7,GNB1,GDI2,ROCK2,GNAL,ARPC1B,GNAI3,ARHGDIB,PAK3,ARPC5,GNAQ,ACTG1,PIP4K2B,GNG4,RHOT1,PIP5K1C,ARPC1A,GNAZ,MYL4,SRC,ARPC3,ARHGAP5,EZR,MYL6B,MYL9,CFL2,PIP4K2A,GNB2,ARPC2,GNB5,RHOB,ARHGEF2,GNG12,ARHGEF9,GNAI1,GNB4,ACTR2,GNAO1,ARHGEF12,RHOC,ARPC5L,WASF1,GNAI2,CFL1,ARHGEF17,ARHGEF7,GNG3,ITGB1,CDH10,ARPC4,ARHGDIA,CREBBP,GRIP1,ROCK1,DGKZ,WASF2,ARHGEF18,FNBP1,PIP4K2C,GDI1,PA…
Maturity Onset Diabetes of Young (MODY) Signaling	8.48E-01	5.56E-02	NaN	2/18 (11%)	0/18 (0%)	1/18 (6%)	15/18 (83%)	CACNA1E,CACNA1C,GAPDH
Chronic Myeloid Leukemia Signaling	8.33E-01	2.5E-02	NaN	23/80 (29%)	0/80 (0%)	19/80 (24%)	38/80 (48%)	SOS2,AKT3,AKT1,MRAS,PIK3R1,SMAD4,MAP2K1,PIK3CB,IKBKG,PIK3CA,PTPN11,GRB2,SIN3A,PA2G4,CRK,HDAC4,HDAC1,PIK3C3,MAPK3,CTBP1,KRAS,HDAC5,HDAC2,RRAS2,CRKL,IKBKB,HDAC3,SOS1,AKT2,BAD,RELA,NRAS,HDAC6,GAB2,PIK3R2,CDKN1B,MAP2K2,MAPK1,BCL2L1,STAT5B,HRAS,RRAS
Tumoricidal Function of Hepatic Natural Killer Cells	8.06E-01	5E-02	NaN	4/20 (20%)	0/20 (0%)	3/20 (15%)	13/20 (65%)	ENDOG,CASP3,BAX,AIFM1,CYCS,BID,M6PR
Role of Macrophages, Fibroblasts and Endothelial Cells in Rheumatoid Arthritis	8.05E-01	1.62E-02	NaN	41/247 (17%)	0/247 (0%)	29/247 (12%)	177/247 (72%)	CAMK2B,PLCD4,DKK3,MRAS,CHP1,MAP2K1,ROCK2,PIK3CB,IKBKG,STAT3,GNAQ,PRKCB,LRP1,PIK3C3,MAPK9,PRKCE,SRC,CTNNB1,IKBKB,IL18,PRKCD,NRAS,PPP3R1,PIK3R2,CAMK2G,PDIA3,MAP2K6,GSK3B,CSNK1A1,MAP2K7,MAPK14,AKT3,AKT1,CREB1,MYD88,GNAO1,CAMK2D,PIK3R1,APC,FN1,PIK3CA,PLCB3,CREBBP,ROCK1,NFAT5,PRKCI,MIF,PRKCZ,MAPK3,PLCB1,KRAS,RRAS2,PPP3CB,CAMK4,PPP3CA,AKT2,CAMK2A,RHOA,RELA,PRKCA,MAP2K4,MAP2K2,MAPK1,PLCH2,PRKD1,PLCL2,HR…
LPS/IL-1 Mediated Inhibition of RXR Function	7.91E-01	1.83E-02	NaN	18/164 (11%)	0/164 (0%)	38/164 (23%)	108/164 (66%)	HMGCS2,ACOX3,FABP3,SLC27A4,ACSL6,ALDH3A2,ALDH9A1,GSTO1,ALDH1A1,ACSL5,CPT1C,CAT,GSTM2,FABP5,MGST3,MAPK9,SLC27A1,GSTT2/GSTT2B,NCOA1,ABCB9,ALDH6A1,GSTM3,ALDH18A1,FABP7,MGST1,XPO1,IL18,SOD3,ALDH5A1,MAOB,ABCB1,MAP2K7,MYD88,CPT1A,FMO1,ABCB11,SULT4A1,GSTM1,ACSL1,ACOX1,GSTM5,ALDH1L2,CPT2,MAPK8,GSTP1,ECSIT,MAOA,HMGCS1,ALDH1L1,GSTK1,ALDH4A1,ACSL4,MAP2K4,ACSBG1,ACSL3,APOE
Intrinsic Prothrombin Activation Pathway	7.87E-01	4.76E-02	NaN	0/21 (0%)	0/21 (0%)	1/21 (5%)	20/21 (95%)	SERPINC1
Leukocyte Extravasation Signaling	7.86E-01	1.82E-02	NaN	44/165 (27%)	1/165 (1%)	20/165 (12%)	100/165 (61%)	CDC42,VCL,MAPK10,ROCK2,RAP1A,PIK3CB,GNAI3,ACTG1,ACTN2,PRKCB,ACTN4,PIK3C3,MAPK9,PRKCE,SRC,CRKL,ARHGAP5,CTNNB1,EZR,RAP1GAP,Wasl,PTK2,TIMP2,PRKCD,CLDN11,PTK2B,PIK3R2,RAP1B,BCAR1,MAP3K4,GNAI1,ITGAM,MAPK14,MLLT4,PIK3R1,THY1,ITGA1,GNAI2,PIK3CA,PTPN11,ITGB1,ROCK1,CRK,MAPK8,PRKCI,PRKCZ,VAV3,CTNNA1,CTTN,RAPGEF4,VASP,ITGA6,ARHGAP35,MSN,FER,RDX,RHOA,CTNNA2,PRKCA,MAP2K4,MAP2K2,MAPK1,PRKD1,RAC1,PRKCG
IL-1 Signaling	7.84E-01	2.33E-02	NaN	40/86 (47%)	0/86 (0%)	10/86 (12%)	36/86 (42%)	GNA13,GNA11,PRKAR2B,MRAS,MAPK10,GNG7,GNB1,PRKAG2,PRKACB,GNAL,GNAI3,IKBKG,ADCY1,GNAQ,ADCY3,GNG4,PRKAR1B,MAPK9,PRKAR2A,GNAZ,IKBKB,GNB2,PRKAR1A,GNB5,GNG12,PRKAG1,MAP2K6,GNAI1,MAP2K7,MAPK14,GNB4,MYD88,GNAO1,GNAI2,GNG3,TOLLIP,ADCY2,MAPK8,ECSIT,GNB2L1,ADCY5,RELA,GNG5,GNAS,MAP2K4,MAPK1,TAB1,GNG2,PRKACA,ADCY9
Gustation Pathway	7.84E-01	2.33E-02	NaN	29/86 (34%)	0/86 (0%)	7/86 (8%)	50/86 (58%)	TDP2,ITPR2,ASIC1,PDE4A,PRKAR2B,GNG7,GNB1,PRKAG2,PRKACB,PDE10A,ADCY1,ADCY3,PDE7B,PDE6D,PDE3A,PRKAR1B,ADCY2,ITPR1,PDE1C,PRKAR2A,PDE12,ADCY5,PDE1B,PDE2A,PRKAR1A,GNG5,GNAS,ITPR3,ENPP6,PDE8B,GNG2,PRKAG1,PRKACA,APEX1,PDE1A,ADCY9
IL-22 Signaling	7.68E-01	4.55E-02	NaN	9/22 (41%)	0/22 (0%)	4/22 (18%)	9/22 (41%)	MAPK14,AKT3,AKT1,MAPK10,AKT2,STAT3,MAP2K4,STAT1,MAPK1,MAPK8,STAT5B,MAPK9,MAPK3
Fatty Acid β-oxidation I	7.68E-01	4.55E-02	NaN	6/22 (27%)	0/22 (0%)	14/22 (64%)	2/22 (9%)	SLC27A1,ACAA2,HSD17B10,HADH,SLC27A4,ACAA1,ACSL6,HADHB,ACADM,ACSL4,ECI1,AUH,ACSL1,ACSL5,HSD17B4,ACSL3,ACSBG1,HSD17B8,SCP2,ECI2
Role of JAK family kinases in IL-6-type Cytokine Signaling	7.51E-01	4.35E-02	NaN	8/23 (35%)	0/23 (0%)	3/23 (13%)	12/23 (52%)	MAPK14,STAT3,MAP2K4,PTPN11,STAT1,MAPK10,MAPK1,MAPK8,STAT5B,MAPK9,MAPK3
Antigen Presentation Pathway	7.51E-01	4.35E-02	NaN	1/23 (4%)	0/23 (0%)	5/23 (22%)	17/23 (74%)	CALR,PSMB6,PDIA3,CANX,B2M,PSMB5
Sphingosine-1-phosphate Signaling	7.46E-01	2.2E-02	NaN	27/91 (30%)	0/91 (0%)	17/91 (19%)	47/91 (52%)	GNAI1,PLCD4,AKT3,GNA13,AKT1,ASAH1,RHOC,PIK3R1,PIK3CB,GNAI3,ADCY1,GNAQ,GNAI2,PIK3CA,ADCY3,PLCB3,RHOT1,ADCY2,PIK3C3,MAPK3,FNBP1,PLCB1,RHOT2,ADCY5,SMPD3,SMPD1,PTK2,AKT2,RHOA,RHOG,GNAS,PTK2B,PIK3R2,RHOB,NAAA,MAPK1,PLCH2,PDIA3,CASP3,PLCL2,SMPD4,RHOF,RAC1,ADCY9
Superpathway of Cholesterol Biosynthesis	7.18E-01	4E-02	NaN	4/25 (16%)	0/25 (0%)	12/25 (48%)	9/25 (36%)	HMGCS2,EBP,HMGCS1,NSDHL,ACAT2,FDPS,HADHB,PMVK,LSS,IDI1,MVK,ACAT1,CYP51A1,GGPS1,MVD,DHCR7
Sonic Hedgehog Signaling	7.18E-01	4E-02	NaN	11/25 (44%)	0/25 (0%)	0/25 (0%)	14/25 (56%)	GSK3B,ADRBK1,PRKAR2B,PRKAR1B,PRKAG2,PRKACA,PRKAG1,PRKACB,DYRK1A,PRKAR2A,PRKAR1A
IL-9 Signaling	7.03E-01	3.85E-02	NaN	6/26 (23%)	0/26 (0%)	4/26 (15%)	16/26 (62%)	STAT3,IRS2,PIK3CA,PIK3R2,STAT1,PIK3R1,STAT5B,PIK3CB,PIK3C3,RELA
D-myo-inositol (1,4,5,6)-Tetrakisphosphate Biosynthesis	6.9E-01	2.02E-02	NaN	30/99 (30%)	0/99 (0%)	29/99 (29%)	40/99 (40%)	PPP2R5E,PTEN,PPP1R8,ATP1A1,PPM1F,PPP2R4,PPP4R1,MTMR2,EPHX2,PPP2R5A,PPP1R1A,SACM1L,PPIP5K1,PTPRF,NUDT11,NUDT5,PPP1R1B,ITPK1,NUDT2,PDXP,ACP1,PTPN12,UBLCP1,PPM1H,PPP1R13B,HACD2,NT5C,NUDT14,PGAM5,Ppp1cc,PPP1R14A,NUDT3,MTMR9,MTMR7,PPFIA2,NUDT9,PPP1R7,WBP11,PPTC7,PTPN11,DUSP14,TNS3,PPP4C,THTPA,SIRPA,MTMR6,SYNJ1,MDP1,PPP1R12A,PTPRN,PPP1CA,SET,PPP1R12C,PPP3CA,PPM1K,PPAPDC2,PPFIA3,IGBP1,NUDT12
D-myo-inositol (3,4,5,6)-tetrakisphosphate Biosynthesis	6.9E-01	2.02E-02	NaN	30/99 (30%)	0/99 (0%)	29/99 (29%)	40/99 (40%)	PPP2R5E,PTEN,PPP1R8,ATP1A1,PPM1F,PPP2R4,PPP4R1,MTMR2,EPHX2,PPP2R5A,PPP1R1A,SACM1L,PPIP5K1,PTPRF,NUDT11,NUDT5,PPP1R1B,ITPK1,NUDT2,PDXP,ACP1,PTPN12,UBLCP1,PPM1H,PPP1R13B,HACD2,NT5C,NUDT14,PGAM5,Ppp1cc,PPP1R14A,NUDT3,MTMR9,MTMR7,PPFIA2,NUDT9,PPP1R7,WBP11,PPTC7,PTPN11,DUSP14,TNS3,PPP4C,THTPA,SIRPA,MTMR6,SYNJ1,MDP1,PPP1R12A,PTPRN,PPP1CA,SET,PPP1R12C,PPP3CA,PPM1K,PPAPDC2,PPFIA3,IGBP1,NUDT12
Dermatan Sulfate Biosynthesis (Late Stages)	6.88E-01	3.7E-02	NaN	0/27 (0%)	0/27 (0%)	1/27 (4%)	26/27 (96%)	SULT4A1
Stearate Biosynthesis I (Animals)	6.88E-01	3.7E-02	NaN	4/27 (15%)	0/27 (0%)	11/27 (41%)	12/27 (44%)	SLC27A1,FAM213B,PPT1,FASN,SLC27A4,GNPAT,ACOT7,ACOT9,THEM4,ACSL6,ACSL4,ACSL1,ACSL5,ACSL3,ACSBG1
Nucleotide Excision Repair Pathway	6.88E-01	3.7E-02	NaN	3/27 (11%)	0/27 (0%)	4/27 (15%)	20/27 (74%)	POLR2B,POLR2H,RAD23B,POLR2E,RPA3,RPA1,POLR2G
Gαs Signaling	6.64E-01	1.94E-02	NaN	40/103 (39%)	0/103 (0%)	5/103 (5%)	58/103 (56%)	GNB4,ADD1,CREB1,PRKAR2B,MRAS,GNG7,CNR1,GNB1,PRKAG2,MAP2K1,PRKACB,ADD2,RAP1A,DRD1,ADCY1,RYR3,ADCY3,GNG3,RYR1,GNG4,PRKAR1B,ADCY2,CREBBP,RAPGEF2,MAPK3,PRKAR2A,SRC,GNB2L1,RAPGEF4,ADCY5,ADD3,GNB2,PRKAR1A,BRAF,GNG5,GNAS,GNB5,MAP2K2,MAPK1,GNG12,GNG2,PRKAG1,PRKACA,RYR2,ADCY9
Oncostatin M Signaling	6.6E-01	3.45E-02	NaN	9/29 (31%)	0/29 (0%)	6/29 (21%)	14/29 (48%)	KRAS,RRAS2,MRAS,MAP2K1,SOS1,NRAS,STAT3,STAT1,MAP2K2,MAPK1,GRB2,STAT5B,HRAS,RRAS,MAPK3
PI3K Signaling in B Lymphocytes	6.52E-01	1.9E-02	NaN	26/105 (25%)	0/105 (0%)	25/105 (24%)	54/105 (51%)	CAMK2B,ITPR2,PLCD4,PTEN,MRAS,CHP1,MAP2K1,PIK3CB,IKBKG,PLEKHA1,PRKCB,ITPR1,CD81,IKBKB,NRAS,PPP3R1,PIK3R2,CAMK2G,PDIA3,AKT3,AKT1,CREB1,CAMK2D,PIK3R1,FYN,PIK3CA,PLCB3,NFAT5,PRKCI,PRKCZ,MAPK3,VAV3,PLCB1,KRAS,IRS2,RRAS2,PPP3CB,CAMK4,PPP3CA,AKT2,CAMK2A,RELA,PDPK1,ITPR3,MAP2K2,MAPK1,PLCH2,PLCL2,HRAS,RRAS,RAC1
TWEAK Signaling	6.47E-01	3.33E-02	NaN	5/30 (17%)	0/30 (0%)	2/30 (7%)	23/30 (77%)	IKBKG,BAG4,IKBKB,CASP3,CYCS,BID,RELA
Chondroitin Sulfate Biosynthesis (Late Stages)	6.47E-01	3.33E-02	NaN	0/30 (0%)	0/30 (0%)	1/30 (3%)	29/30 (97%)	SULT4A1
Allograft Rejection Signaling	6.35E-01	3.23E-02	NaN	0/31 (0%)	0/31 (0%)	1/31 (3%)	30/31 (97%)	B2M
Role of JAK2 in Hormone-like Cytokine Signaling	6.35E-01	3.23E-02	NaN	6/31 (19%)	0/31 (0%)	1/31 (3%)	24/31 (77%)	STAT3,IRS2,PTPN11,STAT1,STAT5B,SIRPA,SH2B1
D-myo-inositol-5-phosphate Metabolism	6.34E-01	1.85E-02	NaN	33/108 (31%)	0/108 (0%)	31/108 (29%)	44/108 (41%)	PPP2R5E,PLCD4,PTEN,PPP1R8,ATP1A1,PPM1F,PPP2R4,PPP4R1,MTMR2,EPHX2,PPP2R5A,PPP1R1A,SACM1L,PPIP5K1,PTPRF,NUDT11,NUDT5,PPP1R1B,PIP4K2A,ITPK1,NUDT2,PDXP,ACP1,PTPN12,UBLCP1,PPM1H,PPP1R13B,HACD2,NT5C,NUDT14,PGAM5,Ppp1cc,PPP1R14A,NUDT3,MTMR9,MTMR7,PPFIA2,NUDT9,PPP1R7,WBP11,PPTC7,PTPN11,DUSP14,TNS3,PPP4C,PLCB3,THTPA,SIRPA,MTMR6,SYNJ1,PLCB1,PIP4K2C,MDP1,PPP1R12A,PTPRN,PPP1CA,SET,PPP1R12C,PPP3CA,PPM1K,PPAPD…
Heparan Sulfate Biosynthesis (Late Stages)	6.23E-01	3.12E-02	NaN	1/32 (3%)	0/32 (0%)	3/32 (9%)	28/32 (88%)	PRDX6,SULT4A1,LIPE,EXTL2
Signaling by Rho Family GTPases	6.21E-01	1.5E-02	NaN	69/200 (35%)	1/200 (1%)	47/200 (24%)	83/200 (42%)	CDH2,GNA13,GNA11,MAPK10,GNB1,MAP3K10,PIK3CB,GNAL,PAK3,ARPC5,GNAQ,RHOT1,PIP5K1C,MAPK9,GNAZ,MYL4,EZR,MYL6B,MYL9,PTK2,GNB2,ARPC2,SEPT7,PTK2B,GNB5,WASF3,MYLK,ARHGEF9,GNAI1,GNB4,ACTR2,GNAO1,ARHGEF12,RHOC,SEPT5,VIM,CFL1,CLIP1,ARHGEF17,ARHGEF7,SEPT11,ITGB1,CDH10,ROCK1,PRKCI,PRKCZ,FNBP1,PIP4K2C,CDC42EP4,GNB2L1,PAK1,MYL12A,PIKFYVE,PPP1R12C,SEPT2,GFAP,RDX,BAIAP2,RHOG,SEPT4,ARHGEF1,MAP2K2,SEPT9,GNG2,RAC1,IQ…
Protein Ubiquitination Pathway	6.17E-01	1.49E-02	NaN	54/201 (27%)	0/201 (0%)	74/201 (37%)	73/201 (36%)	UBE2J1,UBE2M,HSPA1A/HSPA1B,HSPA13,USP11,UBE3B,CUL2,ANAPC5,PSMA7,PSMA2,PSMB2,PSMD10,PSMA1,USP48,DNAJC6,PSMA4,ANAPC2,UBE2L3,UBE2H,USP14,HSP90B1,AMFR,PSMA6,UBE2G1,DNAJB5,ANAPC10,PSMC2,PSMD12,DNAJC8,USP15,USP9X,UBE4A,BIRC6,UBA1,ANAPC4,UBE4B,PSMD7,THOP1,CUL1,PSMA3,DNAJC2,USP5,HSPA14,DNAJC19,USP8,HSPA8,PSMD9,PSMD14,PSMC1,DNAJB6,SMURF1,PSMD5,USP4,UBE2R2,UCHL1,UBR1,B2M,USP10,UBE3A,HSPA9,USP25,USP34,PSMD1…
3-phosphoinositide Degradation	6.06E-01	1.77E-02	NaN	35/113 (31%)	0/113 (0%)	32/113 (28%)	46/113 (41%)	PPP2R5E,PTEN,PPP1R8,ATP1A1,PPM1F,PPP2R4,PPP4R1,MTMR2,MTMR3,EPHX2,OCRL,INPP5B,PPP2R5A,PPP1R1A,SACM1L,PPIP5K1,PTPRF,NUDT11,NUDT5,PPP1R1B,INPP5J,PTPMT1,ITPK1,NUDT2,PDXP,ACP1,PTPN12,UBLCP1,PPM1H,PPP1R13B,HACD2,NT5C,NUDT14,PGAM5,Ppp1cc,PPP1R14A,NUDT3,MTMR9,MTMR7,PPFIA2,NUDT9,PPP1R7,MTM1,WBP11,PPTC7,PTPN11,DUSP14,TNS3,PPP4C,THTPA,SIRPA,MTMR6,SYNJ1,MTMR1,INPP5F,MDP1,PPP1R12A,PTPRN,PPP1CA,SET,PPP1R12C,PP…
Insulin Receptor Signaling	5.95E-01	1.74E-02	NaN	41/115 (36%)	0/115 (0%)	29/115 (25%)	45/115 (39%)	SOS2,ASIC1,PTEN,PRKAR2B,MRAS,PRKAG2,MAP2K1,PRKACB,PIK3CB,OCRL,INPP5B,TSC2,PTPRF,PRKAR1B,NCK1,PIK3C3,PRKAR2A,CRKL,BAD,PRKAR1A,NRAS,RPTOR,GYS1,PIK3R2,PPP1CB,PRKAG1,EIF2B5,GSK3B,Ppp1cc,PPP1R14A,AKT3,AKT1,VAMP2,PPP1R7,PIK3R1,GAB1,FYN,PIK3CA,PTPN11,GRB2,EIF2B1,CRK,MAPK8,PRKCI,EIF2B2,TSC1,PRKCZ,SYNJ1,FOXO1,MAPK3,KRAS,IRS2,MTOR,INPP5F,RRAS2,PPP1R12A,PPP1CA,AKT2,SOS1,PPP1R14C,PDPK1,MAP2K2,MAPK1,LIPE,ACLY…
Role of PKR in Interferon Induction and Antiviral Response	5.89E-01	2.86E-02	NaN	8/35 (23%)	0/35 (0%)	2/35 (6%)	25/35 (71%)	IKBKG,MAPK14,AKT1,STAT1,IKBKB,CASP3,CYCS,MAP2K6,BID,RELA
Retinoic acid Mediated Apoptosis Signaling	5.89E-01	2.86E-02	NaN	3/35 (9%)	0/35 (0%)	3/35 (9%)	29/35 (83%)	CASP3,RXRB,CYCS,BID,CRABP1,DAP3
Neuroprotective Role of THOP1 in Alzheimer's Disease	5.79E-01	2.78E-02	NaN	12/36 (33%)	0/36 (0%)	6/36 (17%)	18/36 (50%)	PDYN,CREB1,PRKAR2B,THOP1,SERPINA3,APP,PRKAG2,ACE,PRKACB,YWHAE,PLG,PRKAR1A,IDE,PRKAR1B,MAPT,PRKAG1,PRKACA,PRKAR2A
Chondroitin Sulfate Biosynthesis	5.79E-01	2.78E-02	NaN	0/36 (0%)	0/36 (0%)	1/36 (3%)	35/36 (97%)	SULT4A1
3-phosphoinositide Biosynthesis	5.69E-01	1.67E-02	NaN	38/120 (32%)	0/120 (0%)	33/120 (28%)	49/120 (41%)	PPP2R5E,PTEN,PPP1R8,ATP1A1,PPM1F,PPP2R4,PPP4R1,MTMR2,PIK3CB,EPHX2,PPP2R5A,PIP4K2B,PPP1R1A,SACM1L,PPIP5K1,PTPRF,NUDT11,PIP5K1C,NUDT5,PPP1R1B,PIK3C3,PIP4K2A,ITPK1,NUDT2,PDXP,ACP1,PI4K2A,PTPN12,PIK3R2,UBLCP1,PPM1H,PPP1R13B,HACD2,NT5C,NUDT14,PGAM5,Ppp1cc,PPP1R14A,NUDT3,MTMR9,MTMR7,PPFIA2,NUDT9,PPP1R7,PIK3R1,WBP11,PPTC7,PIK3CA,PTPN11,DUSP14,TNS3,PPP4C,THTPA,SIRPA,MTMR6,SYNJ1,PIP4K2C,MDP1,PPP1R12A,PTPR…
Netrin Signaling	5.69E-01	2.7E-02	NaN	16/37 (43%)	0/37 (0%)	7/37 (19%)	14/37 (38%)	PRKAR2B,CHP1,PPP3CB,PRKAG2,PPP3CA,PRKACB,ABLIM2,ENAH,PRKAR1A,RYR3,PPP3R1,RAC3,NCK2,RYR1,ABLIM1,PRKAR1B,NFAT5,PRKAG1,PRKACA,RAC1,NCK1,RYR2,PRKAR2A
Heparan Sulfate Biosynthesis	5.69E-01	2.7E-02	NaN	1/37 (3%)	0/37 (0%)	3/37 (8%)	33/37 (89%)	PRDX6,SULT4A1,LIPE,EXTL2
Phototransduction Pathway	5.69E-01	2.7E-02	NaN	11/37 (30%)	0/37 (0%)	3/37 (8%)	23/37 (62%)	PRKAR2B,GUCY1B3,GNB1,GUCY1A3,PRKAG2,PRKACB,PRKAR1A,GNB5,PDE6D,PRKAR1B,RGS9,PRKAG1,PRKACA,PRKAR2A
Relaxin Signaling	5.64E-01	1.65E-02	NaN	50/121 (41%)	0/121 (0%)	18/121 (15%)	53/121 (44%)	GNA13,GNA11,PRKAR2B,MRAS,GUCY1B3,GNG7,GNB1,GUCY1A3,PRKAG2,MAP2K1,PRKACB,RAP1A,PIK3CB,GNAL,GNAI3,ADCY1,GNAQ,ADCY3,GNG4,PDE3A,PDE1C,PRKAR1B,PIK3C3,PRKAR2A,PDE12,GNAZ,GNB2,PRKAR1A,BRAF,ENPP6,GNB5,PIK3R2,PDE8B,GNG12,RAP1B,PRKAG1,GNAI1,TDP2,GNB4,AKT3,PDE4A,AKT1,CREB1,GNAO1,PIK3R1,PDE10A,GNAI2,PIK3CA,GNG3,PDE7B,PDE6D,ADCY2,PRKCZ,MAPK3,GNB2L1,ADCY5,PDE1B,PDE2A,AKT2,RELA,GNG5,GNAS,MAPK1,GNG2,PRKACA,APEX1…
Dermatan Sulfate Biosynthesis	5.59E-01	2.63E-02	NaN	0/38 (0%)	0/38 (0%)	1/38 (3%)	37/38 (97%)	SULT4A1
Serotonin Receptor Signaling	5.49E-01	2.56E-02	NaN	11/39 (28%)	0/39 (0%)	4/39 (10%)	24/39 (62%)	ADCY5,TPH2,DDC,PTS,SPR,QDPR,ADCY1,GNAS,ADCY3,ADCY2,SLC18A2,MAOB,ADCY9,PCBD1,MAOA
Wnt/Ca+ pathway	5.31E-01	2.44E-02	NaN	10/41 (24%)	0/41 (0%)	5/41 (12%)	26/41 (63%)	PLCB1,GSK3B,PLCD4,CREB1,PPP3CA,CAMK2A,RELA,PRKCA,PLCH2,PLCB3,PDIA3,CREBBP,PLCL2,NFAT5,DVL2
TNFR1 Signaling	5.05E-01	2.27E-02	NaN	6/44 (14%)	0/44 (0%)	8/44 (18%)	30/44 (68%)	CDC42,PAK2,MAP4K2,PAK1,IKBKB,CYCS,CRADD,RELA,PAK3,IKBKG,MAP2K4,CASP3,MAPK8,BID
Lymphotoxin β Receptor Signaling	4.9E-01	2.17E-02	NaN	13/46 (28%)	0/46 (0%)	7/46 (15%)	26/46 (57%)	AKT3,AKT1,IKBKB,IKBKAP,PIK3R1,CYCS,PIK3CB,AKT2,RELA,IKBKG,PDPK1,PIK3CA,PIK3R2,MAPK1,CASP3,CREBBP,BCL2L1,PIK3C3,DIABLO,MAPK3
IL-2 Signaling	4.9E-01	2.17E-02	NaN	17/46 (37%)	0/46 (0%)	11/46 (24%)	18/46 (39%)	SOS2,AKT3,AKT1,MRAS,CSNK2A2,PIK3R1,MAP2K1,PIK3CB,PIK3CA,PTPN11,GRB2,MAPK8,PIK3C3,MAPK3,KRAS,RRAS2,CSNK2B,SOS1,AKT2,NRAS,PTK2B,PIK3R2,MAP2K2,MAPK1,STAT5B,HRAS,CSNK2A1,RRAS
ErbB2-ErbB3 Signaling	4.82E-01	2.13E-02	NaN	18/47 (38%)	0/47 (0%)	9/47 (19%)	20/47 (43%)	GSK3B,SOS2,PTEN,AKT1,MRAS,PIK3R1,MAP2K1,PIK3CB,STAT3,PIK3CA,GRB2,FOXO1,PIK3C3,MAPK3,KRAS,RRAS2,SOS1,BAD,NRAS,PDPK1,PIK3R2,CDKN1B,MAP2K2,MAPK1,STAT5B,HRAS,RRAS
Amyloid Processing	4.75E-01	2.08E-02	NaN	23/48 (48%)	0/48 (0%)	9/48 (19%)	16/48 (33%)	GSK3B,CSNK1A1,MAPK14,AKT3,AKT1,PRKAR2B,CSNK2A2,PRKAG2,PRKACB,CSNK1D,PRKAR1B,MAPT,CAPNS1,CAPN7,MAPK3,PRKAR2A,CAPN2,CSNK1E,PRKCE,CSNK2B,CAPN1,APP,CDK5,AKT2,PRKAR1A,NCSTN,CAPN5,MAPK1,MARK1,PRKAG1,PRKACA,CSNK2A1
ATM Signaling	4.67E-01	2.04E-02	NaN	9/49 (18%)	0/49 (0%)	5/49 (10%)	35/49 (71%)	MAPK14,CBX5,CREB1,SMC1A,MAPK10,TLK1,SMC3,TRIM28,MAP2K4,CREBBP,MAPK8,TP53BP1,BID,MAPK9
ILK Signaling	4.63E-01	1.39E-02	NaN	38/144 (26%)	1/144 (1%)	35/144 (24%)	70/144 (49%)	PPP2R5E,CDC42,PTEN,VCL,PPP2R4,MAPK10,ILK,PIK3CB,MYH9,RPS6KA5,MYH14,ACTG1,PPP2R5A,MYH11,PPP2CB,ACTN2,RHOT1,ACTN4,PIK3C3,MAPK9,FERMT2,MYL4,FLNA,CTNNB1,MYL6B,MYL9,PPP2R2C,PTK2,CFL2,PIK3R2,NCK2,RHOB,CASP3,LIMS1,MAP2K6,GSK3B,FLNB,AKT3,AKT1,CREB1,RSU1,RICTOR,RHOC,PARVA,PIK3R1,VIM,CFL1,FN1,MYH4,PIK3CA,ITGB1,PPP2R1A,CREBBP,MAPK8,PPP2CA,MAPK3,FNBP1,IRS2,RHOT2,MTOR,PPP1R12A,MYH10,PARVB,AKT2,PPP2R2A,RHOA,RE…
Estrogen-Dependent Breast Cancer Signaling	4.6E-01	2E-02	NaN	14/50 (28%)	0/50 (0%)	12/50 (24%)	24/50 (48%)	AKT3,AKT1,CREB1,MRAS,HSD17B12,PIK3R1,PIK3CB,PIK3CA,CREBBP,HSD17B8,PIK3C3,MAPK3,KRAS,EGFR,HSD17B10,SRC,RRAS2,AKT2,RELA,NRAS,PIK3R2,HSD17B4,MAPK1,STAT5B,HRAS,RRAS
EGF Signaling	4.6E-01	2E-02	NaN	23/50 (46%)	0/50 (0%)	8/50 (16%)	19/50 (38%)	MAP2K7,SOS2,ITPR2,MAPK14,AKT3,AKT1,CSNK2A2,PIK3R1,MAP2K1,PIK3CB,STAT3,PIK3CA,STAT1,GRB2,ITPR1,MAPK8,PIK3C3,MAPK3,EGFR,MTOR,SRC,CSNK2B,SOS1,AKT2,PRKCA,ITPR3,MAP2K4,PIK3R2,MAPK1,HRAS,CSNK2A1
Sertoli Cell-Sertoli Cell Junction Signaling	4.59E-01	1.38E-02	NaN	51/145 (35%)	2/145 (1%)	27/145 (19%)	65/145 (45%)	CDC42,PTEN,VCL,TUBB3,PRKAR2B,MRAS,GUCY1B3,MAPK10,TUBG1,MAP3K10,GUCY1A3,PRKAG2,MTMR2,MAP2K1,PRKACB,ILK,TUBA1A,ACTG1,PLS1,ACTN2,PRKAR1B,ACTN4,MAPK9,PRKAR2A,SRC,DLG1,CTNNB1,JUP,SPTBN2,RAB8B,TUBB4B,PRKAR1A,NRAS,CLDN11,SORBS1,CLINT1,BCAR1,TUBA4A,MAP3K4,PRKAG1,SPTB,SPTAN1,GSK3B,MAP2K7,MAPK14,EPN2,AKT3,MLLT4,AKT1,TJP1,TUBA8,TUBB6,MAGI2,TUBB2A,SPTBN1,EPB41,NOS1,ITGB1,MPP6,MAPK8,MAPK3,Map3k7,CTNNA1,KRAS,M…
Glioma Invasiveness Signaling	4.53E-01	1.96E-02	NaN	9/51 (18%)	0/51 (0%)	16/51 (31%)	26/51 (51%)	ITGAV,MRAS,RHOC,PIK3R1,PIK3CB,PLG,PIK3CA,RHOT1,PIK3C3,MAPK3,FNBP1,KRAS,RHOT2,RRAS2,PTK2,TIMP2,RHOA,RHOG,NRAS,PIK3R2,RHOB,MAPK1,HRAS,RHOF,RRAS
Superpathway of Inositol Phosphate Compounds	4.47E-01	1.35E-02	NaN	48/148 (32%)	0/148 (0%)	35/148 (24%)	65/148 (44%)	PPP2R5E,PLCD4,PTEN,PPP1R8,ATP1A1,PPM1F,PPP2R4,PPP4R1,MTMR2,PIK3CB,EPHX2,OCRL,INPP5B,PPP2R5A,PPIP5K2,PIP4K2B,PPP1R1A,SACM1L,PPIP5K1,PTPRF,NUDT11,PIP5K1C,NUDT5,PPP1R1B,PIK3C3,PMPCA,INPP5J,PIP4K2A,ITPK1,NUDT2,PDXP,ACP1,PI4K2A,PTPN12,PIK3R2,UBLCP1,PPM1H,PPP1R13B,HACD2,NT5C,NUDT14,PGAM5,Ppp1cc,PPP1R14A,NUDT3,MTMR9,MTMR7,PPFIA2,NUDT9,PPP1R7,PIK3R1,WBP11,PPTC7,PIK3CA,PTPN11,DUSP14,TNS3,PPP4C,PLCB3,THTPA…
TREM1 Signaling	4.47E-01	1.92E-02	NaN	9/52 (17%)	0/52 (0%)	3/52 (6%)	40/52 (77%)	IL18,STAT3,AKT3,AKT1,MYD88,ITGB1,MAPK1,GRB2,STAT5B,AKT2,RELA,MAPK3
Myc Mediated Apoptosis Signaling	4.47E-01	1.92E-02	NaN	13/52 (25%)	0/52 (0%)	20/52 (38%)	19/52 (37%)	SOS2,YWHAQ,AKT3,AKT1,MRAS,MAPK10,PIK3R1,CYCS,YWHAE,PIK3CB,YWHAH,PIK3CA,GRB2,MAPK8,PRKCZ,YWHAB,PIK3C3,MAPK9,KRAS,YWHAG,RRAS2,SOS1,AKT2,BAD,NRAS,MAP2K4,PIK3R2,CASP3,BAX,HRAS,BID,YWHAZ,RRAS
Actin Nucleation by ARP-WASP Complex	4.47E-01	1.92E-02	NaN	14/52 (27%)	0/52 (0%)	24/52 (46%)	14/52 (27%)	SOS2,CDC42,ACTR2,MRAS,RHOC,ARPC5L,ROCK2,ARPC1B,WASF1,ARPC5,ITGB1,ARPC4,GRB2,RHOT1,ROCK1,NCK1,ARPC1A,FNBP1,KRAS,RHOT2,ARPC3,RRAS2,PPP1R12A,VASP,PPP1R12C,ACTR3,SOS1,RHOA,RHOG,BAIAP2,ARPC2,NRAS,NCK2,RHOB,HRAS,RHOF,RRAS,RAC1
Role of JAK1 and JAK3 in γc Cytokine Signaling	4.34E-01	1.85E-02	NaN	11/54 (20%)	0/54 (0%)	9/54 (17%)	34/54 (63%)	KRAS,IRS2,RRAS2,MRAS,PIK3R1,PIK3CB,NRAS,STAT3,PIK3CA,PTK2B,PTPN11,PIK3R2,STAT1,MAPK1,GRB2,STAT5B,HRAS,RRAS,PIK3C3,MAPK3
Role of MAPK Signaling in the Pathogenesis of Influenza	4.21E-01	1.79E-02	NaN	15/56 (27%)	0/56 (0%)	15/56 (27%)	26/56 (46%)	MAP2K7,MAPK14,AKT3,AKT1,PLA2G16,MRAS,MAPK10,MAP2K1,PRDX6,RABGEF1,PNPLA8,MAPK8,MAPK9,MAPK3,KRAS,MAP3K5,RRAS2,AKT2,NRAS,PRKCA,MAP2K4,MAP2K2,MAPK1,PLA2G12A,CASP3,ABHD3,BAX,MAP2K6,HRAS,RRAS
Non-Small Cell Lung Cancer Signaling	4.15E-01	1.75E-02	NaN	18/57 (32%)	0/57 (0%)	15/57 (26%)	24/57 (42%)	SOS2,ITPR2,AKT3,FHIT,AKT1,MRAS,PIK3R1,MAP2K1,PIK3CB,PIK3CA,GRB2,SIN3A,ITPR1,PA2G4,PIK3C3,MAPK3,KRAS,EGFR,RRAS2,RXRB,SOS1,AKT2,BAD,NRAS,PDPK1,PRKCA,ITPR3,PIK3R2,MAP2K2,MAPK1,HRAS,RRAS,STK4
Glutamate Receptor Signaling	4.15E-01	1.75E-02	NaN	24/57 (42%)	0/57 (0%)	5/57 (9%)	28/57 (49%)	SLC17A7,GRM2,GLUL,PICK1,GNG7,GNB1,GRIN1,GRM3,HOMER1,GRIA3,GRIA2,HOMER2,GRM7,GRIP1,SLC1A3,GRM1,GRM5,GRIK3,SLC17A6,GRIA1,GRIK2,CAMK4,SLC1A4,SLC1A2,GRIN2B,DLG4,GNG5,GNG2,GLS
Communication between Innate and Adaptive Immune Cells	4.09E-01	1.72E-02	NaN	1/58 (2%)	0/58 (0%)	1/58 (2%)	56/58 (97%)	IL18,B2M
Angiopoietin Signaling	4.04E-01	1.69E-02	NaN	14/59 (24%)	0/59 (0%)	16/59 (27%)	29/59 (49%)	AKT3,AKT1,MRAS,PIK3R1,PIK3CB,PAK3,IKBKG,PIK3CA,PTPN11,GRB2,CRK,NCK1,FOXO1,PIK3C3,KRAS,PAK2,RRAS2,PAK1,IKBKB,IKBKAP,PTK2,SOS1,AKT2,BAD,RELA,NRAS,PIK3R2,STAT5B,HRAS,RRAS
FLT3 Signaling in Hematopoietic Progenitor Cells	4.04E-01	1.69E-02	NaN	23/59 (39%)	0/59 (0%)	14/59 (24%)	22/59 (37%)	SOS2,MAPK14,AKT3,AKT1,CREB1,MRAS,PIK3R1,MAP2K1,PIK3CB,RPS6KA5,STAT3,PIK3CA,STAT1,PTPN11,GRB2,CREBBP,PIK3C3,MAPK3,KRAS,MTOR,RRAS2,RPS6KA3,SOS1,AKT2,BAD,NRAS,PDPK1,GAB2,RPS6KA2,PIK3R2,MAP2K2,MAPK1,RPS6KA1,EIF4E,STAT5B,HRAS,RRAS
CTLA4 Signaling in Cytotoxic T Lymphocytes	3.87E-01	1.61E-02	NaN	19/62 (31%)	0/62 (0%)	13/62 (21%)	30/62 (48%)	PPP2R5E,AKT3,AP1S1,AKT1,PPP2R4,AP1S2,PIK3R1,PIK3CB,AP1B1,FYN,PIK3CA,PPP2R5A,PTPN11,GRB2,PPP2CB,PPP2R1A,PIK3C3,PPP2CA,AP1G1,CLTC,B2M,PPP2R2C,AP1M1,PPP2R2A,AKT2,CLTA,PIK3R2,AP2A2,AP2A1,CLTB,AP2S1,AP2M1
Crosstalk between Dendritic Cells and Natural Killer Cells	3.87E-01	1.61E-02	NaN	2/62 (3%)	1/62 (2%)	6/62 (10%)	53/62 (85%)	CAMK2B,IL18,ACTG1,CAMK2G,CAMK2D,TLN2,CAMK2A,FSCN1,RELA
PEDF Signaling	3.82E-01	1.59E-02	NaN	13/63 (21%)	0/63 (0%)	16/63 (25%)	34/63 (54%)	MAPK14,AKT3,AKT1,SERPINF1,MRAS,PIK3R1,ROCK2,PIK3CB,IKBKG,PIK3CA,ROCK1,WASF2,PIK3C3,MAPK3,KRAS,RRAS2,IKBKB,DOCK3,AKT2,RELA,RHOA,SOD2,NRAS,PIK3R2,MAPK1,BCL2L1,HRAS,RRAS,RAC1
GABA Receptor Signaling	3.82E-01	1.59E-02	NaN	24/63 (38%)	0/63 (0%)	7/63 (11%)	32/63 (51%)	SLC32A1,GAD1,MRAS,GABBR1,DNM1,ABAT,AP1B1,ADCY1,KCNQ2,GABRA4,ALDH9A1,ADCY3,GABRA1,ADCY2,GPHN,ADCY5,GABRG2,NSF,GABRB3,SLC6A11,GABBR2,GNAS,AP2A2,ALDH5A1,GAD2,AP2A1,UBQLN1,AP2S1,GABRA3,AP2M1,ADCY9
Acute Myeloid Leukemia Signaling	3.62E-01	1.49E-02	NaN	24/67 (36%)	0/67 (0%)	12/67 (18%)	31/67 (46%)	MAP2K5,MAP2K7,SOS2,PML,AKT3,AKT1,MRAS,PIK3R1,MAP2K1,PIK3CB,STAT3,PIK3CA,GRB2,PIK3C3,MAPK3,KRAS,MTOR,RRAS2,JUP,SOS1,AKT2,BAD,RELA,NRAS,BRAF,MAP2K4,PIK3R2,MAP2K2,MAPK1,ARAF,IDH1,STAT5B,MAP2K6,HRAS,RRAS,IDH2
BMP signaling pathway	3.62E-01	1.49E-02	NaN	22/67 (33%)	0/67 (0%)	12/67 (18%)	33/67 (49%)	MAPK14,CREB1,PRKAR2B,MRAS,MAPK10,PRKAG2,SMAD4,MAP2K1,PRKACB,GRB2,PRKAR1B,CREBBP,MAPK8,SMURF1,MAPK9,MAPK3,PRKAR2A,KRAS,RRAS2,MAGED1,CAMK4,SOS1,RELA,PRKAR1A,BMPR2,NRAS,MAP2K4,MAP2K2,MAPK1,TAB1,PRKAG1,PRKACA,HRAS,RRAS
Antioxidant Action of Vitamin C	3.48E-01	1.43E-02	NaN	19/70 (27%)	0/70 (0%)	13/70 (19%)	38/70 (54%)	PLCD4,MAPK14,PLA2G16,PLD3,MAPK10,SLC23A2,PRDX6,IKBKG,GSTO1,PLCB3,PNPLA8,MAPK8,TXNRD2,MAPK9,MAPK3,PLCB1,GLRX,SLC2A3,TXN,TXNRD1,IKBKB,SLC2A1,RELA,MAP2K4,MAPK1,PLCH2,PDIA3,PLA2G12A,ABHD3,PLCL2,STAT5B,TXNRD3
HIPPO signaling	3.34E-01	1.37E-02	NaN	22/73 (30%)	0/73 (0%)	16/73 (22%)	35/73 (48%)	Ppp1cc,PPP2R5E,YWHAQ,PPP1R14A,PPP2R4,PPP1R7,CUL1,SMAD4,DLG3,YWHAE,YWHAH,LLGL1,CSNK1D,PPP2R5A,ITCH,SKP1,PPP2CB,PPP2R1A,PRKCZ,YWHAB,DLG2,PPP2CA,CSNK1E,SCRIB,DLG1,YWHAG,PPP1R12A,SMAD2,PPP1CA,TJP2,PPP2R2C,PPP2R2A,WWC1,PPP1R14C,DLG4,PPP1CB,YWHAZ,STK4
FGF Signaling	3.34E-01	1.37E-02	NaN	19/73 (26%)	0/73 (0%)	13/73 (18%)	41/73 (56%)	SOS2,MAPK14,AKT3,FGF1,AKT1,CREB1,PIK3R1,MAP2K1,GAB1,PIK3CB,RPS6KA5,STAT3,PIK3CA,PTPN11,GRB2,CREBBP,ITPR1,CRK,MAPK8,PIK3C3,MAPK3,FGF12,MAP3K5,CRKL,SOS1,AKT2,PRKCA,PIK3R2,MAPK1,MAP2K6,HRAS,RAC1
TR/RXR Activation	3.22E-01	1.32E-02	NaN	22/76 (29%)	1/76 (1%)	6/76 (8%)	47/76 (62%)	PFKP,NCOR2,AKT3,AKT1,THRA,FASN,PIK3R1,PIK3CB,SYT2,HP,PIK3CA,SYT12,NCOR1,ENO1,PIK3C3,MTOR,NCOA1,MED1,CAMK4,RXRB,SLC2A1,HDAC3,RCAN2,AKT2,TBL1XR1,PIK3R2,ME1,ACACA,NCOA2
PAK Signaling	3.22E-01	1.32E-02	NaN	19/76 (25%)	0/76 (0%)	23/76 (30%)	34/76 (45%)	SOS2,CDC42,MRAS,MAPK10,PIK3R1,MAP2K1,PIK3CB,PAK3,CFL1,PIK3CA,ARHGEF7,ITGB1,GRB2,GIT1,MAPK8,NCK1,PIK3C3,MAPK9,MAPK3,KRAS,PAK2,MYL4,RRAS2,PAK1,MYL12A,MYL6B,MYL9,PTK2,SOS1,CFL2,NRAS,MAP2K4,PTK2B,PIK3R2,NCK2,MYLK,MAP2K2,MAPK1,CASP3,HRAS,RRAS,RAC1
Death Receptor Signaling	3.14E-01	1.28E-02	NaN	12/78 (15%)	1/78 (1%)	9/78 (12%)	56/78 (72%)	MAP2K7,MAP4K4,MAP3K5,HTRA2,IKBKB,CYCS,CRADD,ACIN1,LMNA,TBK1,RELA,ARHGDIB,IKBKG,HSPB1,ACTG1,MAP2K4,CASP3,ROCK1,MAPK8,BID,DIABLO,SPTAN1
PPAR Signaling	2.99E-01	1.22E-02	NaN	20/82 (24%)	0/82 (0%)	10/82 (12%)	52/82 (63%)	NCOR2,SOS2,MRAS,MAP2K1,IKBKG,GRB2,CREBBP,NCOR1,HSP90AA1,MAPK3,SRA1,KRAS,MAP4K4,AIP,RRAS2,NCOA1,HSP90B1,MED1,IKBKB,SOS1,RELA,NRAS,IL18,MAP2K2,MAPK1,TAB1,HSP90AB1,STAT5B,HRAS,RRAS
p53 Signaling	2.95E-01	1.2E-02	NaN	15/83 (18%)	0/83 (0%)	10/83 (12%)	58/83 (70%)	GSK3B,MAPK14,PML,PTEN,AKT3,AKT1,SERPINE2,PIK3R1,THBS1,PIK3CB,PCNA,CSNK1D,PIK3CA,MAPK8,HDAC1,PIK3C3,CTNNB1,MED1,JMY,ST13,AKT2,PIK3R2,PPP1R13B,BAX,BCL2L1
iCOS-iCOSL Signaling in T Helper Cells	2.88E-01	1.18E-02	NaN	16/85 (19%)	0/85 (0%)	16/85 (19%)	53/85 (62%)	CAMK2B,ITPR2,PTEN,AKT3,AKT1,CHP1,CAMK2D,PIK3R1,PIK3CB,IKBKG,PIK3CA,PLEKHA1,GRB2,ITPR1,NFAT5,PIK3C3,PPP3CB,CAMK4,IKBKB,PPP3CA,AKT2,BAD,CAMK2A,RELA,PDPK1,GAB2,PPP3R1,ITPR3,PIK3R2,CSK,CAMK2G,RAC1
PKCθ Signaling in T Lymphocytes	2.81E-01	1.15E-02	NaN	18/87 (21%)	0/87 (0%)	20/87 (23%)	49/87 (56%)	CAMK2B,SOS2,MRAS,CHP1,CAMK2D,MAP3K10,PIK3R1,PIK3CB,IKBKG,FYN,PIK3CA,RAC3,GRB2,NFAT5,MAPK8,PIK3C3,MAPK3,VAV3,Map3k7,KRAS,MAP3K5,RRAS2,PPP3CB,IKBKB,PPP3CA,SOS1,CAMK2A,RELA,NRAS,PPP3R1,MAP2K4,PIK3R2,CAMK2G,MAPK1,MAP3K4,HRAS,RRAS,RAC1
IGF-1 Signaling	2.74E-01	1.12E-02	NaN	29/89 (33%)	0/89 (0%)	19/89 (21%)	41/89 (46%)	SOS2,YWHAQ,AKT3,AKT1,PRKAR2B,MRAS,CSNK2A2,PRKAG2,PIK3R1,MAP2K1,PRKACB,YWHAE,PIK3CB,YWHAH,STAT3,PIK3CA,PTPN11,GRB2,PRKAR1B,MAPK8,PRKCI,PRKCZ,YWHAB,FOXO1,PIK3C3,MAPK3,PRKAR2A,KRAS,IRS2,YWHAG,RRAS2,CSNK2B,PTK2,SOS1,AKT2,BAD,PRKAR1A,NRAS,PDPK1,PIK3R2,MAP2K2,MAPK1,PRKAG1,PRKACA,HRAS,YWHAZ,CSNK2A1,RRAS
Type I Diabetes Mellitus Signaling	2.68E-01	1.1E-02	NaN	17/91 (19%)	0/91 (0%)	6/91 (7%)	68/91 (75%)	MAP2K7,MAPK14,MAP3K5,MYD88,GAD1,PTPRN,MAPK10,HSPD1,IKBKB,CYCS,RELA,IKBKG,MAP2K4,STAT1,MAPK1,GAD2,CPE,CASP3,MAPK8,MAP2K6,BID,ICA1,MAPK9
NGF Signaling	2.68E-01	1.1E-02	NaN	30/91 (33%)	0/91 (0%)	27/91 (30%)	34/91 (37%)	SOS2,CDC42,MRAS,MAPK10,MAP3K10,MAP2K1,ROCK2,RAP1A,PIK3CB,IKBKG,RPS6KA5,PIK3C3,MAPK9,SMPD1,IKBKB,PRKCD,NRAS,PIK3R2,RPS6KA2,RAP1B,BAX,MAP3K4,SMPD4,AKT3,AKT1,CREB1,PIK3R1,GAB1,PIK3CA,PTPN11,TRIO,GRB2,CREBBP,ROCK1,CRK,MAPK8,PRKCZ,MAPK3,Map3k7,KRAS,MAP3K5,RRAS2,SMPD3,RPS6KA3,AKT2,SOS1,RHOA,RELA,RHOG,PDPK1,MAP2K4,MAP2K2,MAPK1,RPS6KA1,HRAS,RRAS,RAC1
Pancreatic Adenocarcinoma Signaling	2.59E-01	1.06E-02	NaN	18/94 (19%)	0/94 (0%)	16/94 (17%)	60/94 (64%)	CDC42,AKT3,AKT1,PLD3,MAPK10,PIK3R1,SMAD4,MAP2K1,PIK3CB,STAT3,PIK3CA,STAT1,GRB2,SIN3A,PA2G4,MAPK8,PIK3C3,MAPK9,MAPK3,KRAS,EGFR,SMAD2,AKT2,BAD,RELA,RALBP1,MAP2K4,PIK3R2,CDKN1B,RALA,MAP2K2,MAPK1,BCL2L1,RAC1
Gα12/13 Signaling	2.53E-01	1.04E-02	NaN	25/96 (26%)	0/96 (0%)	20/96 (21%)	51/96 (53%)	MAP2K7,CDH2,CDC42,AKT3,GNA13,AKT1,MRAS,MAPK10,PIK3R1,MAP2K1,ROCK2,PIK3CB,IKBKG,PIK3CA,CDH10,ROCK1,MAPK8,PIK3C3,MAPK9,MAPK3,VAV3,KRAS,MAP3K5,MYL4,SRC,RRAS2,CTNNB1,MYL12A,MYL6B,IKBKB,MYL9,PTK2,AKT2,RELA,RHOA,NRAS,MAP2K4,PTK2B,PIK3R2,ARHGEF1,MAP2K2,MAPK1,HRAS,RRAS,MEF2A
phagosome maturation	2.53E-01	1.04E-02	NaN	30/96 (31%)	1/96 (1%)	41/96 (43%)	24/96 (25%)	ATP6V1D,VPS18,TUBB3,TUBG1,PRDX1,ATP6AP1,PRDX6,RAB7A,TUBA1A,ATP6V1B2,EEA1,ATP6V1G2,VPS41,VPS37B,VPS33B,DYNC1LI2,GOSR2,PIK3C3,DYNLRB1,DYNC1H1,ATP6V1A,NSF,TUBB4B,ATP6V0C,GPAA1,CALR,RAB5B,PRDX5,DYNC1I1,VPS28,TUBA4A,DYNLL1,VPS11,ATP6V0D1,TUBA8,SNAP25,NAPA,TUBB6,GOSR1,YKT6,STX16,VPS39,TUBB2A,RAB5C,ATP6V1F,VTI1A,VAMP3,NOS1,VPS33A,CANX,LAMP2,PRDX2,ATP6V1E1,M6PR,TSG101,Dync1i2,VPS16,TUBB,DYNC1LI1,RAB5A,PI…
Glucocorticoid Receptor Signaling	2.26E-01	8.51E-03	NaN	56/235 (24%)	0/235 (0%)	36/235 (15%)	143/235 (61%)	HSPA2,NCOR2,HSPA1A/HSPA1B,SOS2,PRKAA1,MRAS,MAPK10,CHP1,SMARCA4,PRKAG2,SMAD4,MAP2K1,PRKACB,PIK3CB,SMARCB1,GTF2A2,IKBKG,STAT3,PIK3C3,MAPK9,PCK2,NCOA1,SMARCD1,SMAD2,MED1,POLR2E,HSP90B1,IKBKB,SMARCE1,ANXA1,NRAS,ACTL6B,PPP3R1,NR3C1,PIK3R2,PTGES3,SMARCD3,BCL2L1,PRKAG1,STAT5B,ARID1A,MAP2K7,MAPK14,AKT3,AKT1,CREB1,PBRM1,SMARCA2,PRKAB1,PIK3R1,YWHAH,HSPA14,SUMO1,FKBP4,POLR2B,FKBP5,PIK3CA,HSPA8,STAT1,GRB2,CR…
PI3K/AKT Signaling	2.23E-01	9.35E-03	NaN	40/107 (37%)	0/107 (0%)	26/107 (24%)	41/107 (38%)	PPP2R5E,SOS2,PTEN,MRAS,PPP2R4,MAP2K1,YWHAE,ILK,PIK3CB,IKBKG,OCRL,INPP5B,PPP2R5A,TSC2,PPP2CB,YWHAG,CTNNB1,HSP90B1,IKBKB,PPP2R2C,BAD,THEM4,NRAS,GYS1,PIK3R2,CDKN1B,BCL2L1,LIMS1,YWHAZ,GSK3B,YWHAQ,AKT3,AKT1,PIK3R1,GAB1,YWHAH,PIK3CA,ITGB1,PPP2R1A,GRB2,HSP90AA1,TSC1,PRKCZ,YWHAB,SYNJ1,FOXO1,PPP2CA,MAPK3,KRAS,MAP3K5,MTOR,INPP5F,RRAS2,AKT2,PPP2R2A,SOS1,RELA,PDPK1,GAB2,MAP2K2,MAPK1,RHEB,EIF4E,HSP90AB1,HRAS,…
PTEN Signaling	2.23E-01	9.35E-03	NaN	35/107 (33%)	0/107 (0%)	20/107 (19%)	52/107 (49%)	SOS2,CDC42,PTEN,MRAS,CSNK2A2,MAP2K1,ILK,PIK3CB,IKBKG,OCRL,INPP5B,RAC3,MAGI3,EGFR,IKBKB,PTK2,BAD,BMPR2,NRAS,PIK3R2,CDKN1B,BCAR1,CASP3,MAGI1,BCL2L1,GSK3B,AKT3,AKT1,PIK3R1,MAGI2,YWHAH,PIK3CA,ITGB1,GRB2,NTRK3,NTRK2,PRKCZ,SYNJ1,FOXO1,MAPK3,KRAS,INPP5F,RRAS2,CSNK2B,AKT2,SOS1,IGF2R,RELA,PDPK1,MAP2K2,MAPK1,HRAS,CSNK2A1,RRAS,RAC1
HMGB1 Signaling	2.18E-01	9.17E-03	NaN	17/109 (16%)	0/109 (0%)	22/109 (20%)	70/109 (64%)	MAP2K5,MAP2K7,MAPK14,CDC42,AKT3,AKT1,MRAS,MAPK10,RBBP7,RHOC,PIK3R1,MAP2K1,PIK3CB,PIK3CA,RHOT1,MAPK8,PIK3C3,MAPK9,MAPK3,FNBP1,KRAS,RHOT2,RRAS2,AKT2,RELA,RHOA,RHOG,NRAS,IL18,MAP2K4,PIK3R2,RHOB,MAP2K2,MAPK1,MAP2K6,HRAS,RHOF,RRAS,RAC1
Ovarian Cancer Signaling	2.13E-01	9.01E-03	NaN	28/111 (25%)	0/111 (0%)	10/111 (9%)	73/111 (66%)	GSK3B,PTEN,AKT3,AKT1,PRKAR2B,MRAS,PRKAG2,PIK3R1,MAP2K1,PRKACB,PIK3CB,APC,ARRB1,PIK3CA,SIN3A,PRKAR1B,PA2G4,PIK3C3,PTGS1,MAPK3,PRKAR2A,KRAS,EGFR,MTOR,SRC,RRAS2,CTNNB1,AKT2,PRKAR1A,NRAS,BRAF,PIK3R2,MAP2K2,MAPK1,PRKAG1,PRKACA,HRAS,RRAS
Adipogenesis pathway	2.13E-01	9.01E-03	NaN	11/111 (10%)	0/111 (0%)	14/111 (13%)	86/111 (77%)	FGF1,AKT1,ATG5,RBBP7,SIN3A,PPIP5K1,HDAC4,BSCL2,HDAC1,FOXO1,CTBP1,HDAC5,HDAC2,RBP1,CDK5,ATG7,HDAC3,SIRT2,RPS6KC1,TBL1XR1,BMPR2,HDAC6,KDM1A,RPS6KA1,STAT5B
Epithelial Adherens Junction Signaling	2.02E-01	8.62E-03	NaN	37/116 (32%)	2/116 (2%)	31/116 (27%)	46/116 (40%)	CDH2,IQGAP1,CDC42,PTEN,VCL,TUBB3,MRAS,TUBG1,RAP1A,ARPC1B,MYH9,ZYX,ARPC5,MYH14,TUBA1A,ACTG1,MYH11,ACTN2,ACTN4,ARPC1A,EGFR,MYL4,SRC,ARPC3,CTNNB1,JUP,MYL6B,MYL9,TUBB4B,ARPC2,BMPR2,NRAS,SORBS1,CLINT1,RAP1B,TUBA4A,MAGI1,ACTR2,EPN2,AKT3,FGF1,MLLT4,AKT1,TUBA8,TUBB6,ARPC5L,MAGI2,WASF1,APC,TUBB2A,MYH4,CLIP1,ARPC4,CRK,CTNNA1,KRAS,RRAS2,TUBB,FER,MYH10,EPN1,AKT2,ACTR3,RHOA,BAIAP2,TUBB4A,CTNNA2,HRAS,RRAS,RAC1
Dendritic Cell Maturation	1.97E-01	8.47E-03	NaN	20/118 (17%)	0/118 (0%)	12/118 (10%)	86/118 (73%)	PLCD4,MAPK14,AKT3,AKT1,CREB1,MYD88,MAPK10,PIK3R1,PIK3CB,IKBKG,PIK3CA,STAT1,PLCB3,CREBBP,MAPK8,PIK3C3,MAPK9,FSCN1,MAPK3,PLCB1,IKBKB,B2M,AKT2,RELA,IL18,MAP2K4,PIK3R2,MAPK1,PLCH2,PDIA3,TAB1,PLCL2

## Sheet: Upstream
© 2000-2015 QIAGEN. All rights reserved.
Upstream Regulator	Exp Fold Change	Molecule Type	Predicted Activation State	Activation z-score	p-value of overlap	Target molecules in dataset	Mechanistic Network
RICTOR	-1.685	other			1.08E-05	PRKCA,PRKCB,PRKCG
L-glutamic acid		chemical - endogenous mammalian			1.25E-03	B2M,BCL2L1,SLC1A3
JAK2		kinase			1.84E-03	BCL2L1,SLC1A3
HTT	-1.930	transcription regulator		-0.106	2.08E-03	B2M,BID,CORO2B,CRYAB,GPX3,HAP1,PRKCB,PRKCG,RGS14,SLC1A3
PPP3CA	-1.033	phosphatase			3.22E-03	CRYAB,CSRP1,TF
MYC		transcription regulator		-0.447	6.84E-03	ALCAM,CRYAB,DBI,GM2A,TLE4
TNR	-1.072	other			8.27E-03	SLC1A3
SLIT2		other			8.27E-03	BCL2L1
ZNF423		transcription regulator			8.27E-03	ADCY3
PAX3		transcription regulator			8.27E-03	BCL2L1
BDNF		growth factor			9.24E-03	BCL2L1,BID,ITIH3,LGALS1,PTPN9,TRIM32
CD53		other			1.65E-02	BCL2L1
Il3		cytokine			1.65E-02	BCL2L1
LPAR1		g-protein coupled receptor			1.65E-02	PRKCG
RPS6KB2		kinase			1.65E-02	BCL2L1
MAP2	-1.142	other			1.65E-02	PRKAR2B
ETS2		transcription regulator			1.65E-02	BCL2L1
STAT3	-1.221	transcription regulator			1.66E-02	BCL2L1,SLC1A3
ADAM10		peptidase			2.10E-02	BID,CRYAB,SHANK3
UBA6	-1.155	enzyme			2.46E-02	SHANK3
KL		enzyme			2.46E-02	BCL2L1
JAK1		kinase			2.46E-02	SLC1A3
PRKCA	-1.307	kinase			2.46E-02	BCL2L1
PENK	1.738	other			2.46E-02	SCN9A
MAP1S	-1.031	enzyme			2.46E-02	BCL2L1
Nrg1		other			2.46E-02	BCL2L1
SOD1	1.253	enzyme			2.51E-02	B2M,BCL2L1,BID,CRYAB
EBF1		transcription regulator			3.27E-02	ADCY3
GRM3	-1.353	g-protein coupled receptor			3.27E-02	SLC1A3
RPS6KB1		kinase			4.07E-02	BCL2L1
GRM5	-1.768	g-protein coupled receptor			4.07E-02	BCL2L1
HIPK2		kinase			4.07E-02	BCL2L1
EOMES		transcription regulator			4.12E-02	DUSP14,PLXNA4
Ins1		other			4.71E-02	PRKCA,PRKCB
BCL2L12		other			4.86E-02	CRYAB
ATXN1	-2.315	transcription regulator			4.86E-02	PRKCG
CX3CL1	3.020	cytokine			4.86E-02	BCL2L1
GATA3		transcription regulator			4.86E-02	BCL2L1
ADRB2		g-protein coupled receptor			4.86E-02	PLXNA1
L-dopa		chemical - endogenous mammalian	Inhibited	-2.236	5.17E-01	CORO2B,MPP6,MYO1B,RGS14,SHANK3

## Sheet: networks
© 2000-2015 QIAGEN. All rights reserved.
ID	Molecules in Network	Score	Focus Molecules	Top Diseases and Functions
1	ARHGEF7,BCL2L1,BDNF,beta-estradiol,CALCOCO1,CCND1,CD9,CD53,CREB1,CSRP1,EHBP1,EHD4,GHR,Ins1,LRP1,LRRC8A,MAPK9,MYC,MYO1B,OXTR,PLXNA2,PLXNC1,PRKAR2B,PRKCA,PRKCG,RAD23B,RICTOR,RPS6KB2,SEPT4,SHH,SIRPA,STAT5B,STMN1,STXBP3,TPT1	21	15	Cell Morphology, Cellular Development, Cellular Growth and Proliferation
2	ADCYAP1R1,BDNF,BID,Ca2+,CACNA1C,CNR1,CORO2B,CX3CL1,DAGLA,DCTN1,DLG4,DLGAP1,dopamine,FSCN1,GABRG2,GRIA2,HAP1,HOMER1,ITIH3,ITPR1,KIF5A,L-dopa,LAMP2,LGALS1,LZTS3,MPP6,NLGN1,PLK2,PTPN9,RYR1,SCN9A,SHANK3,SIPA1L1,SYNGAP1,TRIM32	17	13	Cell-To-Cell Signaling and Interaction, Nervous System Development and Function, Neurological Disease
3	ADCY3,ADRB2,AES,APP,CD9,CD82,CD151,CPNE6,CRYAB,CSF2RB,DUSP14,EOMES,EXOC1,EXOC2,EXOC3,EXOC4,EXOC6,EXOC8,FES,HGF,HP,Hrk,IL6ST,iron,MYC,NCAM1,NCF1,NRP1,PLXNA1,PLXNA4,PPP3CA,PRKCB,SDC4,TF,TTR	15	12	Cardiovascular System Development and Function, Organismal Development, Cellular Movement
4	ADCYAP1,AKAP2,B2M,BDNF,CACNA1B,CACNA2D1,CASP2,CASP8,CTTN,CX3CL1,CYCS,DCTN1,FAS,GPX3,GRM3,HLA-E,HRAS,HTT,ICAM1,IL1B,iron,MAPK3,MEF2D,MIF,MYC,RGS14,RHOG,SERPINC1,SERPINF2,SLC1A3,SNCA,STMN1,TENM2,TP53,TP53I11	13	11	Neurological Disease, Skeletal and Muscular Disorders, Psychological Disorders
5	AKT1,ALCAM,APP,CAMK2G,CDKN1A,CREBBP,DBI,E2F1,EGF,GM2A,MYC,PML,RBL1,RBL2,RHOA,SMAD3,SMAD4,TLE4,TNF,TP53,YY1	6	5	Cellular Growth and Proliferation, Gene Expression, Cell Cycle
6	CAMK2N1,TAZ	2	1	Cell Cycle, Amino Acid Metabolism, Energy Production
7	HMGCS2,MTOR	2	1	Energy Production, Lipid Metabolism, Small Molecule Biochemistry
8	AATK,FMR1	2	1	Cell Morphology, Nervous System Development and Function, Tissue Morphology
9	PRMT5,SNRPD1	2	1	Amino Acid Metabolism, Post-Translational Modification, Small Molecule Biochemistry
10	DOCK10,ERG	2	1	Cellular Development, Cellular Function and Maintenance, Hematological System Development and Function
11	RIMS1,UNC13A	2	1	Cell-To-Cell Signaling and Interaction, Cellular Assembly and Organization, Cellular Function and Maintenance
12	CNTNAP1,Mbp,UGT8	1	1	Cellular Development, Nervous System Development and Function, Cell Morphology

## Sheet: dis and bio
© 2000-2015 QIAGEN. All rights reserved.
Categories	Diseases or Functions Annotation	p-Value	Predicted Activation State	Activation z-score	Molecules	# Molecules
Nervous System Development and Function, Tissue Morphology	morphology of nervous tissue	3.54E-04			AATK,B2M,BCL2L1,BID,GM2A,LGALS1,PLXNA2,PLXNA4,PLXNC1,PTPN9,SLC1A3,UGT8,UNC13A	13
Cellular Assembly and Organization	clustering of mitochondria	4.20E-04			BCL2L1,BID	2
Carbohydrate Metabolism, Molecular Transport, Small Molecule Biochemistry	uptake of 2-deoxyglucose	5.16E-04			PRKCA,PRKCB,SLC1A3	3
Cell Morphology, Nervous System Development and Function, Tissue Morphology	morphology of neurons	8.75E-04			AATK,B2M,BCL2L1,BID,GM2A,LGALS1,PLXNA2,PLXNA4,PLXNC1,SLC1A3,UGT8,UNC13A	12
Cell Morphology, Nervous System Development and Function, Tissue Morphology	abnormal morphology of neurons	1.02E-03			AATK,B2M,BID,GM2A,LGALS1,PLXNA2,PLXNA4,PLXNC1,SLC1A3,UGT8,UNC13A	11
Nervous System Development and Function, Organ Morphology, Organismal Development	abnormal morphology of lateral geniculate nucleus	1.04E-03			B2M,TENM2	2
Cell-To-Cell Signaling and Interaction, Cellular Growth and Proliferation, Nervous System Development and Function	hyperexcitation of neurons	1.04E-03			PRKCG,SCN9A	2
Organismal Development	abnormal morphology of head	1.18E-03			ADCY3,AES,B2M,BID,GM2A,HAP1,LGALS1,PLXNA2,PLXNA4,PTPN9,SLC1A3,TENM2,UGT8	13
Cell-To-Cell Signaling and Interaction, Nervous System Development and Function	posttetanic potentiation	1.45E-03			PRKCA,PRKCB	2
Nervous System Development and Function, Organ Morphology, Organismal Development	abnormal morphology of brain	1.61E-03			ADCY3,B2M,BID,GM2A,HAP1,LGALS1,PLXNA2,PLXNA4,PTPN9,SLC1A3,TENM2,UGT8	12
Neurological Disease, Psychological Disorders	Schizophrenia	1.90E-03			CSRP1,DHPS,LGALS1,PRKAR2B,PRKCB,TF,TTR	7
Nervous System Development and Function	morphology of nervous system	1.99E-03			AATK,ADCY3,B2M,BCL2L1,BID,DAGLA,GM2A,HAP1,LGALS1,PLXNA2,PLXNA4,PLXNC1,PTPN9,SLC1A3,TENM2,UGT8,UNC13A	17
Nervous System Development and Function	abnormal morphology of nervous system	2.06E-03			AATK,ADCY3,B2M,BID,DAGLA,GM2A,HAP1,LGALS1,PLXNA2,PLXNA4,PLXNC1,PTPN9,SLC1A3,TENM2,UGT8,UNC13A	16
Cellular Growth and Proliferation	proliferation of cells	3.00E-03		0.139	AATK,ACSL6,ADCY3,ALCAM,B2M,BCAT1,BCL2L1,BID,CRYAB,CSRP1,DAGLA,DBI,DHPS,DOCK4,EHD4,GPX3,HAP1,HP1BP3,LGALS1,PLXNA1,PLXNA4,PRKCA,PRKCB,PRRC2C,RHOG,SCPEP1,SEPT4,SERPINC1,SERPINF2,SLC1A3,STAT5B,TF,TP53I11,TRIM32	34
Cell-To-Cell Signaling and Interaction, Nervous System Development and Function	neurotransmission	3.41E-03	Decreased	-2.186	CACNA1B,CACNA1C,CPNE6,HAP1,PRKCA,PRKCB,PRKCG,SCN9A,SHANK3,SLC1A3	10
Cell-To-Cell Signaling and Interaction, Nervous System Development and Function	long term depression of Purkinje cells	3.71E-03			PRKCA,PRKCG	2
Nervous System Development and Function, Organ Morphology, Organismal Development	abnormal morphology of forebrain	3.76E-03			ADCY3,B2M,GM2A,HAP1,PLXNA4,PTPN9,TENM2	7
Hereditary Disorder, Neurological Disease, Psychological Disorders, Skeletal and Muscular Disorders	Huntington's Disease	4.03E-03			B2M,BCL2L1,MYO1B,PREPL,PRKCB,PRKCG,RHOG,SLC1A3	8
Nervous System Development and Function, Organ Morphology, Organismal Development	abnormal morphology of telencephalon	4.31E-03			ADCY3,B2M,GM2A,PLXNA4,PTPN9,TENM2	6
Cell-To-Cell Signaling and Interaction	synaptic depression	4.42E-03			B2M,PPP1R14A,PRKCA,PRKCG,UNC13A	5
Cell-To-Cell Signaling and Interaction, Nervous System Development and Function	long term depression of cells	4.63E-03			PPP1R14A,PRKCA,PRKCG	3
Cell Morphology	abnormal morphology of plasma membrane	4.92E-03			AATK,B2M,LGALS1,PLXNA2,PLXNA4,UNC13A	6
Cell Morphology, Cellular Compromise	shrinkage of cells	5.20E-03			BCL2L1,BID	2
Cell Morphology, Nervous System Development and Function, Organ Morphology, Organismal Development, Tissue Morphology	abnormal morphology of Purkinje cells	6.05E-03			GM2A,SLC1A3,UGT8	3
Cell Morphology	tubulation of cells	6.05E-03			ALCAM,CRYAB,PRKCA	3
Neurological Disease	damage of central nervous system	6.26E-03		0.391	BCL2L1,GPX3,HP,SLC1A3,TF	5
Cell-To-Cell Signaling and Interaction, Nervous System Development and Function	synaptic transmission	6.58E-03		-1.951	CACNA1C,CPNE6,HAP1,PRKCA,PRKCB,PRKCG,SHANK3,SLC1A3	8
Cell Morphology, Nervous System Development and Function, Tissue Morphology	abnormal morphology of mossy fibers	6.92E-03			PLXNA2,PLXNA4	2
Nervous System Development and Function, Organ Morphology, Organismal Development	abnormal morphology of diencephalon	7.07E-03			B2M,GM2A,HAP1,TENM2	4
Cell Morphology, Nervous System Development and Function, Organ Morphology, Organismal Development, Tissue Morphology	abnormal morphology of granule cells	7.87E-03			BID,GM2A	2
Neurological Disease, Skeletal and Muscular Disorders	neuromuscular disease	8.20E-03			ALCAM,B2M,BCL2L1,MYO1B,PREPL,PRKCB,PRKCG,RHOG,SLC1A3	9
Endocrine System Development and Function, Organ Morphology, Organismal Development, Tissue Morphology	abnormal morphology of Rathke's pouch	8.46E-03			AES	1
Nervous System Development and Function	abnormal morphology of limbic system	8.46E-03			GM2A	1
Nervous System Development and Function	abnormal morphology of nociceptor	8.46E-03			LGALS1	1
Cell-To-Cell Signaling and Interaction, Nervous System Development and Function	activation of serotonergic neurons	8.46E-03			CACNA1B	1
Nervous System Development and Function	adaptation of hair cells	8.46E-03			MYO1B	1
Neurological Disease, Organismal Injury and Abnormalities	damage of cerebellum	8.46E-03			SLC1A3	1
Cell Morphology, Cellular Assembly and Organization	diameter of secretory vesicles	8.46E-03			PTPN9	1
Cell-To-Cell Signaling and Interaction, Cellular Growth and Proliferation, Nervous System Development and Function	hyperexcitation of sensory neurons	8.46E-03			SCN9A	1
Cell-To-Cell Signaling and Interaction, Cellular Growth and Proliferation, Nervous System Development and Function	hypoexcitation of sympathetic neuron	8.46E-03			SCN9A	1
Cell Signaling, Vitamin and Mineral Metabolism	movement of Ca2+	8.46E-03			BCL2L1	1
Cell-To-Cell Signaling and Interaction, Nervous System Development and Function	neurotransmission of serotonergic neurons	8.46E-03			CACNA1B	1
Nervous System Development and Function, Neurological Disease, Ophthalmic Disease	optic nerve cupping	8.46E-03			SLC1A3	1
Cancer, Cardiovascular Disease, Organismal Injury and Abnormalities	pyogenic granuloma	8.46E-03			BCL2L1	1
Molecular Transport, Small Molecule Biochemistry	release of lactic acid	8.46E-03			SLC1A3	1
Lipid Metabolism, Small Molecule Biochemistry	storage of ganglioside GM2	8.46E-03			GM2A	1
Cell Death and Survival	quantity of apoptotic cells	9.62E-03			BCL2L1,BID,PRKCA	3
Cellular Development, Cellular Growth and Proliferation, Nervous System Development and Function, Tissue Development	proliferation of neuronal cells	9.66E-03		1.077	AATK,ACSL6,B2M,CSRP1,DAGLA,DOCK4,HAP1,PLXNA1,PLXNA4,PRKCA,RHOG	11
Cellular Movement	cell movement	9.68E-03		0.429	ADCY3,ALCAM,BCAT1,CRYAB,DOCK10,DOCK4,HP,LGALS1,PLXNA1,PLXNA2,PLXNC1,PRKCA,PRKCG,RHOG,SEPT4,SERPINC1,SLC1A3,TRIM32	18
Cellular Growth and Proliferation	arrest in proliferation of cells	1.12E-02			ALCAM,BCL2L1,PRKCB	3
Cell-To-Cell Signaling and Interaction, Nervous System Development and Function	long term depression	1.24E-02			B2M,PPP1R14A,PRKCA,PRKCG	4
Cell Morphology, Nervous System Development and Function, Organ Morphology, Organismal Development	morphology of brain cells	1.28E-02			BID,GM2A,SLC1A3,UGT8	4
Neurological Disease, Organismal Injury and Abnormalities	neurodegeneration of forebrain	1.34E-02			BCL2L1,HAP1	2
Cell Morphology, Cellular Assembly and Organization	elongation of cellular protrusions	1.36E-02			AATK,ADCY3,ALCAM	3
Cell-To-Cell Signaling and Interaction, Cellular Growth and Proliferation, Nervous System Development and Function	excitation of neurons	1.42E-02			CACNA1C,PRKCG,SCN9A	3
Cell Morphology, Cellular Movement, Nervous System Development and Function	innervation of sensory neurons	1.48E-02			ADCY3,PLXNA4,TENM2	3
Endocrine System Development and Function, Nervous System Development and Function, Organ Morphology, Organismal Development	abnormal morphology of hypothalamus	1.60E-02			GM2A,HAP1	2
Nervous System Development and Function, Organ Morphology, Organismal Development	abnormal morphology of entorhinal area	1.68E-02			GM2A	1
Cell Morphology, Nervous System Development and Function, Tissue Morphology	abnormal morphology of sympathetic postganglionic fiber	1.68E-02			PLXNA4	1
Lipid Metabolism, Molecular Transport, Small Molecule Biochemistry	accumulation of galactosylceramide	1.68E-02			UGT8	1
Cellular Assembly and Organization, Cellular Function and Maintenance, Nervous System Development and Function	axonal transport of autophagosomes	1.68E-02			HAP1	1
Cell Morphology, Cellular Assembly and Organization	elongation of cilia	1.68E-02			ADCY3	1
Hereditary Disorder, Neurological Disease	familial amyotrophic lateral sclerosis	1.68E-02			BCL2L1	1
Neurological Disease, Psychological Disorders	first-onset paranoid schizophrenia	1.68E-02			TTR	1
Cellular Assembly and Organization, Cellular Function and Maintenance	formation of actin cytoskeleton	1.68E-02			AKAP2	1
Cell-To-Cell Signaling and Interaction	fusion of endothelial cells	1.68E-02			LGALS1	1
Nervous System Development and Function	morphogenesis of glossopharyngeal nerve	1.68E-02			PLXNA4	1
Endocrine System Disorders, Neurological Disease, Organismal Injury and Abnormalities	neurodegeneration of hypothalamus	1.68E-02			HAP1	1
Cell Death and Survival	onset of apoptosis	1.68E-02			BCL2L1	1
Cell Morphology, Cellular Assembly and Organization, Nervous System Development and Function	polarization of neurites	1.68E-02			DOCK4	1
Cellular Assembly and Organization	quantity of cytoplasmic inclusions	1.68E-02			CRYAB	1
Drug Metabolism, Lipid Metabolism, Molecular Transport, Small Molecule Biochemistry	release of epoprostenol	1.68E-02			SERPINC1	1
Cell-To-Cell Signaling and Interaction, Nervous System Development and Function	short-term depression of synapse	1.68E-02			UNC13A	1
Cardiovascular System Development and Function, Tissue Morphology	stimulation of endothelial tissue	1.68E-02			SERPINC1	1
Cell Morphology, Cell-To-Cell Signaling and Interaction, Nervous System Development and Function, Tissue Morphology	abnormal morphology of synapse	1.76E-02			B2M,LGALS1,UNC13A	3
Cellular Movement, Nervous System Development and Function	guidance of motor axons	1.87E-02			ALCAM,PLXNA4	2
Cell Morphology, Tissue Morphology	volume of cells	2.02E-02			BCL2L1,SHANK3	2
Cellular Function and Maintenance, Small Molecule Biochemistry	homeostasis of metal ion	2.04E-02			CACNA1C,PRKCA,PRKCB,TF	4
Cell Death and Survival	necrosis	2.16E-02		-1.180	AATK,BCL2L1,BID,CRYAB,EHD4,HAP1,LGALS1,PRKCA,PRKCG,SERPINC1,SLC1A3,TF,TTR,WFS1	14
Cellular Assembly and Organization, Nervous System Development and Function, Tissue Morphology	abnormal quantity of synaptic vesicles	2.17E-02			B2M,UNC13A	2
Cell Morphology	morphology of cells	2.37E-02			AATK,B2M,BCL2L1,BID,GM2A,LGALS1,PLXNA2,PLXNA4,PLXNC1,SHANK3,SIPA1L1,SLC1A3,UGT8,UNC13A	14
Neurological Disease, Organismal Injury and Abnormalities	damage of brain	2.38E-02		0.849	BCL2L1,GPX3,HP,SLC1A3	4
Nervous System Development and Function, Organ Morphology, Organismal Development	abnormal morphology of visual cortex	2.52E-02			TENM2	1
Neurological Disease, Organismal Injury and Abnormalities	damage of white matter	2.52E-02			TF	1
Cell Cycle	delay in initiation of G0/G1 phase transition	2.52E-02			BCL2L1	1
Cellular Development, Embryonic Development, Nervous System Development and Function, Organismal Development, Tissue Development	differentiation of cortical precursor cells	2.52E-02			BCL2L1	1
Cellular Assembly and Organization	formation of endosomes	2.52E-02			EHD4	1
Cellular Growth and Proliferation, Nervous System Development and Function, Tissue Development	generation of dopaminergic neurons	2.52E-02			BCL2L1	1
Dermatological Diseases and Conditions	psoriasis	2.52E-02			BCL2L1	1
Behavior	rotation behavior	2.52E-02			PRKCB	1
Cell Morphology, Cellular Function and Maintenance	transmembrane potential of mitochondria	2.64E-02			BCL2L1,BID	2
Cell-To-Cell Signaling and Interaction, Nervous System Development and Function	synaptic transmission of cells	2.91E-02			CACNA1C,CPNE6,HAP1,PRKCG,SHANK3,SLC1A3	6
Embryonic Development, Organismal Development	development of head	2.96E-02			AATK,ADCY3,AES,BCL2L1,DBI,HAP1,PLXNA4,SEPT4,SHANK3,SLC1A3	10
Cellular Development, Nervous System Development and Function, Tissue Development	development of neurons	2.97E-02		1.203	ADCY3,CSRP1,DAGLA,HAP1,MICALL1,PLXNA4,PRKCA,RHOG,SEPT4,SHANK3,SIPA1L1,SLC1A3,UGT8	13
Cell Death and Survival	cell death of granule cells	3.02E-02			AATK,BCL2L1,BID	3
Nervous System Development and Function	development of cranial nerve	3.33E-02			PLXNA4,SLC1A3	2
Nervous System Development and Function, Organ Morphology, Organismal Development	abnormal morphology of disorganized barrel cortex	3.34E-02			PLXNA4	1
Nervous System Development and Function, Organ Morphology, Organismal Development	abnormal morphology of piriform cortex	3.34E-02			GM2A	1
Cell Death and Survival	cell death of cerebellar macroneurons	3.34E-02			BCL2L1	1
Cell Death and Survival, Cellular Compromise, Neurological Disease, Tissue Morphology	degeneration of perikaryon	3.34E-02			BCL2L1	1
Cellular Development, Cellular Growth and Proliferation, Embryonic Development, Nervous System Development and Function, Organ Development, Organismal Development, Respiratory System Development and Function, Tissue Development	formation of olfactory receptor neurons	3.34E-02			ADCY3	1
Cellular Movement	haptotaxis of cells	3.34E-02			PRKCG	1
Cell Morphology, Cellular Assembly and Organization, Cellular Function and Maintenance	reorganization of actin filaments	3.34E-02			SERPINC1	1
Cellular Assembly and Organization, Nervous System Development and Function	replenishment of synaptic vesicles	3.34E-02			UNC13A	1
Cell Signaling, Cellular Function and Maintenance, Small Molecule Biochemistry, Vitamin and Mineral Metabolism	homeostasis of Ca2+	3.52E-02			CACNA1C,PRKCA,PRKCB	3
Cellular Movement	migration of cells	3.58E-02		0.429	ADCY3,ALCAM,BCAT1,CRYAB,DOCK10,HP,LGALS1,PLXNA1,PLXNA2,PLXNC1,PRKCA,SEPT4,SERPINC1,SLC1A3,TRIM32	15
Cell Death and Survival	neuronal cell death	3.60E-02		-1.338	AATK,BCL2L1,BID,EHD4,HAP1,LGALS1,PRKCA,PRKCG,SLC1A3,TF,TTR,WFS1	12
Cell Death and Survival	cell death of astrocytes	3.70E-02			BCL2L1,CRYAB	2
Cell Morphology, Nervous System Development and Function, Tissue Morphology	size of neurons	3.74E-02			B2M,BCL2L1,SIPA1L1	3
Cell Morphology, Nervous System Development and Function, Tissue Morphology	abnormal morphology of axons	3.84E-02			AATK,PLXNA2,PLXNA4	3
Cellular Compromise	acidification of cells	4.16E-02			BCL2L1	1
Neurological Disease	degeneration of optic nerve	4.16E-02			SLC1A3	1
Embryonic Development, Nervous System Development and Function, Organ Development, Organismal Development, Tissue Development	formation of cerebral neocortex	4.16E-02			SLC1A3	1
Embryonic Development, Nervous System Development and Function, Organ Development, Organ Morphology, Organismal Development, Tissue Development	morphogenesis of anterior commissure	4.16E-02			PLXNA4	1
Cell Death and Survival	pyknosis of cells	4.16E-02			BCL2L1	1
Cell-To-Cell Signaling and Interaction, Nervous System Development and Function	response of synapse	4.16E-02			SHANK3	1
Cell Morphology, Cellular Assembly and Organization, Nervous System Development and Function, Tissue Morphology	size of presynaptic terminals	4.16E-02			B2M	1
Cell Death and Survival, Nervous System Development and Function	survival of enteric neurons	4.16E-02			BCL2L1	1
Cardiovascular System Development and Function, Cell Morphology, Cellular Development, Organismal Development, Tissue Development	tubulation of endothelial cells	4.29E-02			CRYAB,PRKCA	2
Nervous System Development and Function	abnormal morphology of cranial nerve	4.65E-02			LGALS1,PLXNA4,SLC1A3	3
Cell Death and Survival, Nervous System Development and Function	cell viability of neurons	4.90E-02			BCL2L1,EHD4,PRKCA,PRKCG,SLC1A3	5
Endocrine System Development and Function, Organ Morphology, Organismal Development	abnormal morphology of enlarged pituitary gland	4.97E-02			AES	1
Nervous System Development and Function, Organ Morphology, Organismal Development	ectopic arrangement of cerebellar granule cell	4.97E-02			PLXNA2	1
Cellular Assembly and Organization, Cellular Development, Nervous System Development and Function, Tissue Development	maturation of synaptic vesicles	4.97E-02			UNC13A	1
Cell Death and Survival, Nervous System Development and Function	survival of superior cervical ganglion neurons	4.97E-02			EHD4	1
Cell Morphology, Nervous System Development and Function, Tissue Morphology	volume of neurons	4.97E-02			BCL2L1	1
