# Supplementary material for: Label-Free Proteomic Analysis of Protein Changes in the Striatum during Chronic Ethanol Use and Early Withdrawal
Source: Front Behav Neurosci. 2016 Mar 11;10:46. doi: 10.3389/fnbeh.2016.00046 (PMC4786553; doi:10.3389/fnbeh.2016.00046)
Supplement: Supplementary file 5 [file DataSheet3.XLS]

## Sheet: molecules
© 2000-2015 QIAGEN. All rights reserved.
Symbol	Entrez Gene Name	GenPept/UniProt/Swiss-Prot Accession	Exp Fold Change	Exp p-value	Exp False Discovery Rate (q-value)	Networks	Location	Type(s)	Biomarker Application(s)	Drug(s)	Entrez Gene ID for Human	Entrez Gene ID for Mouse	Entrez Gene ID for Rat
3,4-dihydroxyphenylacetic acid	--	--				1,3	Other	chemical - endogenous mammalian
4-hydroxy-3-methoxyphenylacetic acid	--	--				3	Other	chemical - endogenous mammalian	efficacy,response to therapy
ACSL6	acyl-CoA synthetase long-chain family member 6	Q91WC3	-1.433	3.34E-19	6.29E-17		Cytoplasm	enzyme			23305	216739	117243
ADAM10	ADAM metallopeptidase domain 10	--				1	Plasma Membrane	peptidase			102	11487	29650
ADCY5	adenylate cyclase 5	P84309	1.751	1.63E-06	6.32E-05	3	Plasma Membrane	enzyme			111	224129	64532
ADCYAP1	adenylate cyclase activating polypeptide 1 (pituitary)	--					Extracellular Space	other			116	11516	24166
ADORA2A	adenosine A2a receptor	--					Plasma Membrane	G-protein coupled receptor	unspecified application	adenosine, istradefylline, dyphylline, aspirin/butalbital/caffeine, acetaminophen/caffeine/dihydrocodeine, acetaminophen/aspirin/caffeine, caffeine/ergotamine, aspirin/caffeine/propoxyphene, aspirin/butalbital/caffeine/codeine, aspirin/caffeine/dihydrocodeine, binodenoson, regadenoson, preladenant, caffeine/ethanol, SCH-412348, acetaminophen/butalbital/caffeine, aminophylline, aspirin/caffeine/or…	135	11540	25369
AGFG2	ArfGAP with FG repeats 2	Q80WC7-2	1.368	6.93E-06	2.33E-04	1	Other	other			3268	231801
AGT	angiotensinogen (serpin peptidase inhibitor, clade A, member 8)	--					Extracellular Space	growth factor	efficacy		183	11606	24179
AKT1	v-akt murine thymoma viral oncogene homolog 1	P31750	1.107	5.88E-01	8.80E-01	2	Cytoplasm	kinase	diagnosis,efficacy,response to therapy	MK2206, GSK2141795, ipatasertib, LY2780301, ARQ 092, AZD5363, BAY1125976, MPT0E028, archexin, enzastaurin, perifosine	207	11651	24185
ANXA6	annexin A6	P14824	1.829	6.80E-07	2.90E-05		Plasma Membrane	ion channel			309	11749	79125
APOE	apolipoprotein E	P08226	-1.060	6.69E-01	9.08E-01	4	Extracellular Space	transporter	diagnosis,efficacy,prognosis,unspecified application		348	11816	25728
APP	amyloid beta (A4) precursor protein	P12023-2	-1.198	2.03E-01	6.17E-01	4,5	Plasma Membrane	other	diagnosis,efficacy,unspecified application	bapineuzumab, florbetapir F18, florbetaben F	351	11820	54226
AR	androgen receptor	--				2	Nucleus	ligand-dependent nuclear receptor	diagnosis,disease progression,efficacy	estradiol valerate/testosterone enanthate, estradiol cypionate/testosterone cypionate, BMS-641988, cyproterone acetate/ethinyl estradiol, enzalutamide, galeterone, 1-testosterone, flutamide/goserelin, nandrolone phenpropionate, ODM-201, drospirenone/ethinyl estradiol, nilutamide, bicalutamide, flutamide, nandrolone decanoate, testosterone cypionate, cyproterone acetate, drospirenone, medroxyproge…	367	11835	24208
ARC	activity-regulated cytoskeleton-associated protein	--				1,4,5	Cytoplasm	other			23237	11838	54323
ARHGAP26	Rho GTPase activating protein 26	Q6ZQ82	1.360	1.35E-05	4.07E-04		Cytoplasm	other			23092	71302	307459
ASCL1	achaete-scute family bHLH transcription factor 1	--					Nucleus	transcription regulator	unspecified application		429	17172	64186
ATF2	activating transcription factor 2	--					Nucleus	transcription regulator	prognosis		1386	11909	81647
ATM	ATM serine/threonine kinase	--					Nucleus	kinase	diagnosis		472	11920	300711
ATN1	atrophin 1	--					Nucleus	transcription regulator			1822	13498	100911672|29515
ATP	--	--				3	Other	chemical - endogenous mammalian
ATP1A2	ATPase, Na+/K+ transporting, alpha 2 polypeptide	Q6PIE5	1.816	1.42E-03	2.31E-02	5	Plasma Membrane	transporter		digoxin, ethacrynic acid, perphenazine	477	98660	24212
ATP1A3	ATPase, Na+/K+ transporting, alpha 3 polypeptide	Q6PIC6	1.228	3.40E-01	7.37E-01	3,5	Plasma Membrane	transporter		digoxin, ethacrynic acid, perphenazine	478	232975	24213
ATP1B2	ATPase, Na+/K+ transporting, beta 2 polypeptide	P14231	2.191	4.26E-12	4.09E-10	5	Plasma Membrane	transporter			482	11932	24214
ATXN1	ataxin 1	P54254	1.920	9.98E-04	1.73E-02	1	Nucleus	transcription regulator			6310	20238	25049
BAX	BCL2-associated X protein	Q07813	-1.044	8.32E-01	9.62E-01	5	Cytoplasm	transporter	efficacy,prognosis,unspecified application		581	12028	24887
BCAT1	branched chain amino-acid transaminase 1, cytosolic	P24288	-1.430	2.20E-08	1.30E-06		Cytoplasm	enzyme			586	12035	29592
BCL11B	B-cell CLL/lymphoma 11B (zinc finger protein)	--					Nucleus	other			64919	58208	314423
BDNF	brain-derived neurotrophic factor	--				3	Extracellular Space	growth factor	efficacy,response to therapy		627	12064	24225
Becn2	beclin 2	--					Other	other				226720	289269
beta-estradiol	--	--				1	Other	chemical - endogenous mammalian	diagnosis,efficacy,safety
BID	BH3 interacting domain death agonist	P70444	8.642	5.78E-15	7.54E-13	3	Cytoplasm	other			637	12122	64625
BRINP2	bone morphogenetic protein/retinoic acid inducible neural-specific 2	Q6DFY8	-1.435	1.09E-05	3.45E-04	5	Cytoplasm	other			57795	240843	286895
BRK1	BRICK1, SCAR/WAVE actin-nucleating complex subunit	Q91VR8	1.355	8.42E-10	6.30E-08	2	Cytoplasm	other			55845	101314	679934
BSG	basigin (Ok blood group)	P18572-2	1.138	4.55E-01	8.08E-01	5	Plasma Membrane	transporter	disease progression,prognosis,response to therapy		682	12215	25246
C1orf52	chromosome 1 open reading frame 52	Q9CWU4	-1.385	9.43E-10	6.95E-08		Nucleus	other			148423	66421	499724
CACNA1B	calcium channel, voltage-dependent, N type, alpha 1B subunit	O55017	1.545	8.69E-31	3.79E-28	3	Plasma Membrane	ion channel		ziconotide, clevidipine butyrate, levetiracetam, gabapentin, bepridil, agmatine	774	12287	257648
CACNA1E	calcium channel, voltage-dependent, R type, alpha 1E subunit	Q61290	1.539	2.25E-05	6.49E-04	5	Plasma Membrane	ion channel			777	12290	54234
CACNA2D1	calcium channel, voltage-dependent, alpha 2/delta subunit 1	O08532-2	-1.001	9.93E-01	1.00E00	5	Plasma Membrane	ion channel		amlodipine/hydrochlorothiazide/valsartan, amlodipine/telmisartan, aliskiren/amlodipine, amlodipine/hydrochlorothiazide/olmesartan medoxomil, nilvadipine, amlodipine/valsartan, amlodipine/perindopril, amlodipine/benazepril, gabapentin, bepridil, enalapril/felodipine, amlodipine/atorvastatin, nisoldipine, isradipine, felodipine, nitrendipine, amlodipine, nicardipine, nifedipine, pregabalin	781	12293	25399
CADPS	Ca++-dependent secretion activator	Q80TJ1	-1.147	3.35E-01	7.36E-01	6	Plasma Membrane	other			8618	27062	26989
CAMK2G	calcium/calmodulin-dependent protein kinase II gamma	Q923T9-2	-1.689	1.85E-11	1.71E-09	2	Cytoplasm	kinase			818	12325	171140
CASP2	caspase 2, apoptosis-related cysteine peptidase	--				3	Cytoplasm	peptidase			835	12366	64314
CBR3	carbonyl reductase 3	Q8K354	1.349	1.95E-06	7.40E-05	1	Cytoplasm	enzyme			874	109857	304078
CHCHD3	coiled-coil-helix-coiled-coil-helix domain containing 3	Q9CRB9	1.747	4.22E-18	6.93E-16		Cytoplasm	other			54927	66075	296966
CHERP	calcium homeostasis endoplasmic reticulum protein	Q8CGZ0	-6.140	2.88E-30	9.76E-28		Cytoplasm	other			10523	27967	290614
CISD3	CDGSH iron sulfur domain 3	B1AR13	-1.850	1.08E-07	5.93E-06		Cytoplasm	other			284106	217149|100504524
CNR1	cannabinoid receptor 1 (brain)	P47746	2.783	2.71E-20	5.51E-18	1,2	Plasma Membrane	G-protein coupled receptor		trans-(±)-nabilone, SLV 319, rimonabant, BAY 38-7271, delta-8-tetrahydrocannabinol, delta-9-tetrahydrocannabinol	1268	12801	25248
COQ7	coenzyme Q7 homolog, ubiquinone (yeast)	P97478	2.745	9.24E-06	3.01E-04		Cytoplasm	enzyme			10229	12850	25249
CREB1	cAMP responsive element binding protein 1	P16220-3	-1.521	3.41E-01	7.37E-01	5	Nucleus	transcription regulator			1385	12912	81646
CREBBP	CREB binding protein	P45481	1.077	5.81E-01	8.77E-01	2	Nucleus	transcription regulator		PRI-724	1387	12914	54244
CX3CL1	chemokine (C-X3-C motif) ligand 1	O35188	-1.147	6.00E-01	8.82E-01	3,4	Extracellular Space	cytokine			6376	20312	89808
DAGLA	diacylglycerol lipase, alpha	Q6WQJ1	2.174	2.20E-07	1.06E-05	2	Plasma Membrane	enzyme			747	269060	309207
DBI	diazepam binding inhibitor (GABA receptor modulator, acyl-CoA binding protein)	P31786	1.925	1.87E-05	5.45E-04	5	Cytoplasm	other			1622	13167	25045
DCTN1	dynactin 1	O08788	-1.146	3.39E-01	7.37E-01	3	Cytoplasm	other			1639	13191	29167
DHX57	DEAH (Asp-Glu-Ala-Asp/His) box polypeptide 57	Q6P5D3-2	-2.550	1.71E-05	5.08E-04		Extracellular Space	other			90957	106794	366532
DLG4	discs, large homolog 4 (Drosophila)	Q62108-3	1.270	5.69E-02	3.15E-01	4	Plasma Membrane	kinase	unspecified application		1742	13385	29495
DLGAP3	discs, large (Drosophila) homolog-associated protein 3	Q6PFD5	1.508	1.83E-03	2.81E-02		Cytoplasm	other			58512	242667	286923
DOCK10	dedicator of cytokinesis 10	Q8BZN6	2.182	2.34E-18	3.96E-16	4	Cytoplasm	other			55619	210293	301556
dopamine	--	--					Other	chemical - endogenous mammalian
DRD3	dopamine receptor D3	--				1,3	Plasma Membrane	G-protein coupled receptor	unspecified application	paliperidone, carbidopa/entacapone/levodopa, iloperidone, asenapine, abaperidone, PNU 170413, cariprazine, rotigotine, carbidopa/levodopa, domperidone, chlorprothixene, trifluoperazine, fluphenazine, pimozide, clozapine, haloperidol, fluoxetine/olanzapine, fluphenazine decanoate, thiothixene, amitriptyline/perphenazine, haloperidol decanoate, trimethobenzamide, fluphenazine enanthate, perphenazin…	1814	13490	29238
EEF2	eukaryotic translation elongation factor 2	P58252	-1.085	5.42E-01	8.54E-01	5	Cytoplasm	translation regulator			1938	13629	29565
EGF	epidermal growth factor	--				2	Extracellular Space	growth factor	diagnosis,efficacy,response to therapy,unspecified application		1950	13645	25313
EIF2B5	eukaryotic translation initiation factor 2B, subunit 5 epsilon, 82kDa	Q8CHW4	-1.974	1.30E-06	5.14E-05		Cytoplasm	translation regulator			8893	224045	192234
ERBB4	erb-b2 receptor tyrosine kinase 4	--					Plasma Membrane	kinase	efficacy,safety	BMS-599626, afatinib, poziotinib	2066	13869	59323
ERG	v-ets avian erythroblastosis virus E26 oncogene homolog	--				4	Nucleus	transcription regulator	prognosis		2078	13876	170909
ERLIN1	ER lipid raft associated 1	Q91X78	1.875	1.03E-14	1.28E-12	1	Plasma Membrane	other			10613	226144	293939
ESR1	estrogen receptor 1	--					Nucleus	ligand-dependent nuclear receptor	diagnosis,disease progression,efficacy,prognosis,response to therapy	17-alpha-ethinylestradiol, fulvestrant, beta-estradiol, estradiol 17beta-cypionate, estriol, estrone, estradiol valerate, mestranol, CHF-4227, bazedoxifene, estradiol valerate/testosterone enanthate, TAS-108, ethinyl estradiol/ethynodiol diacetate, estradiol acetate, esterified estrogens, estradiol cypionate/medroxyprogesterone acetate, estradiol/norethindrone acetate, estradiol cypionate/testost…	2099	13982	24890
FLOT1	flotillin 1	O08917	1.814	2.44E-07	1.16E-05	4	Plasma Membrane	other			10211	14251	64665
FMR1	fragile X mental retardation 1	P35922-9	-2.060	7.64E-05	1.94E-03	5	Nucleus	other			2332	14265	24948
FOXA1	forkhead box A1	--				1	Nucleus	transcription regulator	disease progression		3169	15375	25098
FOXA2	forkhead box A2	--				1	Nucleus	transcription regulator	disease progression		3170	15376	25099
FSCN1	fascin actin-bundling protein 1	Q61553	1.180	3.86E-02	2.54E-01	3	Cytoplasm	other	unspecified application		6624	14086	683788
FXR1	fragile X mental retardation, autosomal homolog 1	Q5XI81	-1.955	9.89E-07	4.16E-05	5	Cytoplasm	other			8087	14359	361927
FXR2	fragile X mental retardation, autosomal homolog 2	Q9WVR4	-1.854	1.34E-02	1.31E-01	5	Cytoplasm	other			9513	23879	287433
GAB1	GRB2-associated binding protein 1	Q9QYY0	1.564	5.07E-03	6.14E-02	2	Cytoplasm	other			2549	14388	361388
GBP2	guanylate binding protein 2, interferon-inducible	Q9Z0E6	1.278	3.93E-06	1.40E-04	4	Cytoplasm	enzyme			2634	14469	171164
GCA	grancalcin, EF-hand calcium binding protein	Q8VC88	-1.743	8.15E-18	1.30E-15	4	Cytoplasm	other			25801	227960	295647
GDNF	glial cell derived neurotrophic factor	--				1,2	Extracellular Space	growth factor			2668	14573	25453
GFAP	glial fibrillary acidic protein	P03995-2	-2.227	8.88E-02	4.07E-01		Cytoplasm	other	diagnosis		2670	14580	24387
GLS	glutaminase	D3Z7P3	-1.463	4.23E-06	1.48E-04	5	Cytoplasm	enzyme		CB-839	2744	14660	24398
GNAL	guanine nucleotide binding protein (G protein), alpha activating activity polypeptide, olfactory type	Q8CGK7	1.745	1.49E-05	4.45E-04	3	Cytoplasm	enzyme			2774	14680	24611
GNG7	guanine nucleotide binding protein (G protein), gamma 7	Q61016	1.369	5.35E-01	8.50E-01	3	Plasma Membrane	enzyme			2788	14708	58979
GPD2	glycerol-3-phosphate dehydrogenase 2 (mitochondrial)	Q64521	-1.462	2.04E-07	9.96E-06	1	Cytoplasm	enzyme			2820	14571	25062
GPRASP1	G protein-coupled receptor associated sorting protein 1	--					Cytoplasm	transporter			9737	67298	171407
GPX3	glutathione peroxidase 3	P46412	-3.330	1.80E-05	5.33E-04	3	Extracellular Space	enzyme	unspecified application		2878	14778	64317
GPX4	glutathione peroxidase 4	O70325-2	-1.336	3.50E-02	2.37E-01		Cytoplasm	enzyme			2879	625249	29328
GRM1	glutamate receptor, metabotropic 1	P97772-2	1.124	5.03E-01	8.30E-01	2,5	Plasma Membrane	G-protein coupled receptor	efficacy	fasoracetam	2911	14816	24414
GRM2	glutamate receptor, metabotropic 2	Q14BI2	1.957	5.07E-07	2.20E-05	2	Plasma Membrane	G-protein coupled receptor		talaglumetad, fasoracetam	2912	108068	24415
GRM3	glutamate receptor, metabotropic 3	Q9QYS2	1.656	8.65E-08	4.83E-06	2	Plasma Membrane	G-protein coupled receptor		fasoracetam	2913	108069	24416
GRM5	glutamate receptor, metabotropic 5	Q3UVX5	1.662	2.16E-05	6.28E-04	2,5	Plasma Membrane	G-protein coupled receptor		fasoracetam, acamprosate	2915	108071	24418
HDAC3	histone deacetylase 3	O88895	2.186	2.89E-02	2.17E-01		Nucleus	transcription regulator		tributyrin, belinostat, pyroxamide, mocetinostat, bortezomib/vorinostat, chidamide, 4SC-202, vorinostat, romidepsin	8841	15183	84578
HDAC4	histone deacetylase 4	Q6NZM9	-1.347	7.28E-05	1.86E-03	1	Nucleus	transcription regulator		tributyrin, belinostat, pyroxamide, romidepsin	9759	208727	363287
HDAC6	histone deacetylase 6	Q9Z2V5	-1.108	5.65E-01	8.69E-01		Nucleus	transcription regulator	efficacy	tributyrin, belinostat, pyroxamide, bortezomib/vorinostat, ricolinostat, vorinostat, romidepsin	10013	15185	100911205|84581
HDAC7	histone deacetylase 7	--					Nucleus	transcription regulator		tributyrin, belinostat, pyroxamide, romidepsin	51564	56233	84582
heparan sulfate	--	--				5	Other	chemical - endogenous mammalian
HEY2	hes-related family bHLH transcription factor with YRPW motif 2	--				4	Nucleus	transcription regulator			23493	15214	155430
HIST1H1D	histone cluster 1, H1d	P43277	-1.537	6.99E-12	6.58E-10		Nucleus	other			3007	14957
HMGCS2	3-hydroxy-3-methylglutaryl-CoA synthase 2 (mitochondrial)	P54869	1.704	5.56E-06	1.91E-04	3	Cytoplasm	enzyme	unspecified application		3158	15360	24450
HOMER1	homer scaffolding protein 1	Q9Z2Y3	1.125	4.09E-01	7.80E-01	1,2,3,4,5	Plasma Membrane	other			9456	26556	29546
HOMER2	homer scaffolding protein 2	--				2	Plasma Membrane	other			9455	26557	29547
HSPA2	heat shock 70kDa protein 2	P17156	1.388	1.23E-05	3.75E-04	3	Cytoplasm	other			3306	15512	60460
HSPG2	heparan sulfate proteoglycan 2	Q05793	1.101	6.67E-01	9.08E-01	5	Extracellular Space	enzyme	unspecified application		3339	15530
HTRA2	HtrA serine peptidase 2	Q9JIY5	-1.097	7.84E-01	9.48E-01	3	Cytoplasm	peptidase			27429	64704	297376
HTT	huntingtin	P42859	1.068	5.80E-01	8.77E-01	3	Cytoplasm	transcription regulator	unspecified application		3064	15194	29424
ICAM1	intercellular adhesion molecule 1	--				5	Plasma Membrane	transmembrane receptor	diagnosis,efficacy,prognosis,unspecified application		3383	15894	25464
IFNG	interferon, gamma	--				4	Extracellular Space	cytokine	diagnosis,efficacy,response to therapy,unspecified application		3458	15978	25712
IL11	interleukin 11	--				4	Extracellular Space	cytokine	unspecified application		3589	16156	171040
IL1B	interleukin 1, beta	--				4	Extracellular Space	cytokine	diagnosis,efficacy,prognosis	canakinumab, gevokizumab, canakinumab/INS, gallium nitrate	3553	16176	24494
IL6R	interleukin 6 receptor	--				4	Plasma Membrane	transmembrane receptor	efficacy	tocilizumab	3570	16194	24499
ILF3	interleukin enhancer binding factor 3, 90kDa	Q9Z1X4	-4.204	9.85E-07	4.16E-05	1	Nucleus	transcription regulator			3609	16201	84472
iron	--	--					Other	chemical - endogenous mammalian	safety
JAK1	Janus kinase 1	--					Cytoplasm	kinase	efficacy	tofacitinib, ruxolitinib, momelotinib, INCB039110, INCB052793	3716	16451	84598
JAK2	Janus kinase 2	--					Cytoplasm	kinase	efficacy,prognosis	tofacitinib, pacritinib, ruxolitinib, momelotinib, NS-018, SB-1317, BMS-911543	3717	16452	24514
JUND	jun D proto-oncogene	--				1	Nucleus	transcription regulator			3727	16478	24518
KCNB1	potassium channel, voltage gated Shab related subfamily B, member 1	Q03717	1.725	4.36E-01	7.99E-01	3	Plasma Membrane	ion channel		dalfampridine	3745	16500	25736
KCNIP2	Kv channel interacting protein 2	Q9JJ69	1.589	1.92E-07	9.50E-06	3	Cytoplasm	other			30819	80906	100911951
KCNIP3	Kv channel interacting protein 3, calsenilin	--					Nucleus	transcription regulator			30818	56461	65199
KDR	kinase insert domain receptor	--				2	Plasma Membrane	kinase	disease progression,efficacy,prognosis,response to therapy,safety	AEE 788, sunitinib, cediranib, pazopanib, axitinib, tesevatinib, CEP 7055, brivanib alaninate, CHIR-265, lenvatinib, tivozanib, motesanib, OSI-930, telatinib, ramucirumab, cabozantinib, nintedanib, regorafenib, bortezomib/sorafenib, lapatinib/pazopanib, dexamethasone/lenalidomide/sorafenib, bevacizumab/sorafenib, MGCD-265, cabozantinib/erlotinib, famitinib, lucitanib, paclitaxel/ramucirumab, doce…	3791	16542	25589
KIAA1217	KIAA1217	A2AQ25-4	-4.407	7.96E-06	2.65E-04		Cytoplasm	other			56243	208618	291356
L-dopa	--	--				1	Other	chemical - endogenous mammalian
L-glutamic acid	--	--				5	Other	chemical - endogenous mammalian	efficacy,response to therapy
LGALS1	lectin, galactoside-binding, soluble, 1	P16045	-1.681	2.26E-06	8.40E-05	2	Extracellular Space	other	diagnosis,prognosis		3956	16852	56646
LHX2	LIM homeobox 2	--					Nucleus	transcription regulator			9355	16870	296706
LIAS	lipoic acid synthetase	Q99M04	-7.721	1.75E-08	1.05E-06		Cytoplasm	enzyme			11019	79464	305348
LMNA	lamin A/C	P48678-2	-1.300	1.17E-06	4.67E-05	1	Nucleus	other			4000	16905	60374
LPAR1	lysophosphatidic acid receptor 1	--					Plasma Membrane	G-protein coupled receptor			1902	14745	116744
LRRC7	leucine rich repeat containing 7	Q80TE7	1.771	1.41E-05	4.23E-04	2	Plasma Membrane	other			57554	242274	117284
LZTS3	leucine zipper, putative tumor suppressor family member 3	A2AHG0	1.040	8.06E-01	9.56E-01	1	Cytoplasm	other			9762	241638	280670
magnesium	--	--					Other	chemical - endogenous mammalian	efficacy,safety
manganese	--	--					Other	chemical - endogenous mammalian
MAP2	microtubule-associated protein 2	P20357	-1.314	3.16E-03	4.28E-02		Plasma Membrane	other		estramustine	4133	17756	25595
MAPT	microtubule-associated protein tau	P10637	-1.010	9.46E-01	9.94E-01		Plasma Membrane	other	diagnosis,efficacy,unspecified application		4137	17762	29477
MARK4	MAP/microtubule affinity-regulating kinase 4	Q8CIP4	-2.313	1.29E-10	1.03E-08	2	Cytoplasm	kinase			57787	232944	680407
MIF	macrophage migration inhibitory factor (glycosylation-inhibiting factor)	P34884	1.093	7.66E-01	9.38E-01	4,5	Extracellular Space	cytokine	diagnosis,prognosis,response to therapy		4282	17319	81683
mir-9	microRNA 9-1	--				5	Cytoplasm	microRNA			407047|407051|407046	723968|387133|723967	100314149|100313995|100313994|100526636|100526617|100526581
mir-124	microRNA 124-1	--				5	Cytoplasm	microRNA	unspecified application		406908|406907|406909	723951|723950|387233	100314291|100314024|100314155
MPP6	membrane protein, palmitoylated 6 (MAGUK p55 subfamily member 6)	Q9JLB0-2	1.574	5.08E-21	1.17E-18	1	Plasma Membrane	kinase			51678	56524	362359
MRPS28	mitochondrial ribosomal protein S28	Q9CY16	-1.691	1.01E-09	7.31E-08		Cytoplasm	other			28957	66230
MTCH1	mitochondrial carrier 1	Q791T5-2	1.809	1.71E-07	8.63E-06	2	Cytoplasm	other			23787	56462	294313
MTDH	metadherin	Q80WJ7	-1.508	1.21E-01	4.77E-01	2	Cytoplasm	transcription regulator	prognosis		92140	67154	170910
MTOR	mechanistic target of rapamycin (serine/threonine kinase)	Q9JLN9	1.089	2.99E-01	7.19E-01	3	Nucleus	kinase	efficacy	ridaforolimus, OSI-027, methotrexate/sirolimus/tacrolimus, dactolisib, AZD2014, apitolisib, PKI-179, everolimus/exemestane, lenalidomide/temsirolimus, cc-223, PF-05212384, imatinib/sirolimus, cyclophosphamide/sirolimus, P7170, cyclosporine A/sirolimus/tacrolimus, everolimus/pasireotide, mTOR inhibitor, PWT33597, PQR309, VS-5584, sirolimus, temsirolimus, tacrolimus, everolimus, pimecrolimus	2475	56717	56718
MTX2	metaxin 2	O88441	1.980	3.06E-05	8.68E-04		Cytoplasm	transporter			10651	53375	288150
MYADM	myeloid-associated differentiation marker	O35682	1.499	9.02E-06	2.96E-04	5	Nucleus	other			91663	50918	369016
MYO1B	myosin IB	P46735-2	2.635	6.42E-10	4.87E-08	1	Cytoplasm	other			4430	17912	117057
MYO5A	myosin VA (heavy chain 12, myoxin)	Q9Y4I1-2	1.167	8.37E-02	3.94E-01	4	Cytoplasm	enzyme			4644	17918	25017
NDUFA2	NADH dehydrogenase (ubiquinone) 1 alpha subcomplex, 2, 8kDa	Q9CQ75	1.461	5.06E-06	1.75E-04		Cytoplasm	enzyme			4695	17991	291660
NDUFA13	NADH dehydrogenase (ubiquinone) 1 alpha subcomplex, 13	Q9ERS2	1.600	1.06E-06	4.32E-05		Cytoplasm	enzyme			51079	67184	100911483|314759
NDUFS1	NADH dehydrogenase (ubiquinone) Fe-S protein 1, 75kDa (NADH-coenzyme Q reductase)	Q91VD9	1.387	1.26E-10	1.02E-08	3	Cytoplasm	enzyme			4719	227197	301458
NELFB	negative elongation factor complex member B	Q8C4Y3	-1.545	1.07E-06	4.32E-05		Nucleus	other			25920	58202	311796
NGB	neuroglobin	Q9ER97	-1.690	8.61E-02	4.01E-01	4	Cytoplasm	transporter			58157	64242	85382
NKX2-3	NK2 homeobox 3	--				4	Nucleus	transcription regulator			159296	18089	309389
NLGN1	neuroligin 1	Q99K10	-2.281	3.06E-01	7.23E-01	4	Plasma Membrane	enzyme			22871	192167	116647
NQO1	NAD(P)H dehydrogenase, quinone 1	Q64669	1.665	2.82E-07	1.30E-05	2	Cytoplasm	enzyme	diagnosis,unspecified application		1728	18104	24314
NR4A2	nuclear receptor subfamily 4, group A, member 2	--				1	Nucleus	ligand-dependent nuclear receptor			4929	18227	54278
NRP1	neuropilin 1	--				5	Plasma Membrane	transmembrane receptor	diagnosis,efficacy		8829	18186	246331
NSF	N-ethylmaleimide-sensitive factor	P46460	1.038	3.87E-01	7.66E-01	3	Cytoplasm	transporter			4905	18195	60355
NT5DC3	5'-nucleotidase domain containing 3	Q3UHB1	-1.530	9.65E-06	3.11E-04		Other	other			51559	103466	691922
NTN1	netrin 1	--				2	Extracellular Space	other			9423	18208	114523
NTS	neurotensin	--				3	Extracellular Space	other			4922	67405	299757
OPRK1	opioid receptor, kappa 1	--					Plasma Membrane	G-protein coupled receptor		acetaminophen/pentazocine, aspirin/oxycodone, dihydrocodeine, aspirin/caffeine/propoxyphene, aspirin/butalbital/caffeine/codeine, dextromethorphan/morphine, morphine/naltrexone, buprenorphine/naloxone, acetaminophen/aspirin/codeine, eluxadoline, naloxone/oxycodone, bupropion/naltrexone, acetaminophen/codeine, codeine/promethazine, acetaminophen/oxycodone, acetaminophen/propoxyphene, etorphine, al…	4986	18387	29335
OSTF1	osteoclast stimulating factor 1	Q62422	-2.296	2.10E-06	7.93E-05	5	Nucleus	transcription regulator			26578	20409	259275
PAX2	paired box 2	--					Nucleus	transcription regulator			5076	18504	293992
PAX6	paired box 6	--				2	Nucleus	transcription regulator			5080	18508	25509
PCK2	phosphoenolpyruvate carboxykinase 2 (mitochondrial)	Q8BH04	-1.567	2.69E-08	1.57E-06		Cytoplasm	kinase			5106	74551	361042
PDYN	prodynorphin	O35417	8.682	1.64E-30	5.95E-28	1,2	Extracellular Space	transporter	unspecified application		5173	18610	29190
PHACTR1	phosphatase and actin regulator 1	Q2M3X8	1.329	1.05E-06	4.32E-05	4	Cytoplasm	other			221692	218194	306844
PHB2	prohibitin 2	O35129	1.752	1.16E-06	4.65E-05	4	Cytoplasm	transcription regulator			11331	12034	114766
PHOX2B	paired-like homeobox 2b	--					Nucleus	transcription regulator			8929	18935
PIK3CB	phosphatidylinositol-4,5-bisphosphate 3-kinase, catalytic subunit beta	Q8BTI9	1.062	4.39E-01	8.00E-01	2	Cytoplasm	kinase		SF 1126, PX-866, dactolisib, pictilisib, buparlisib, XL147, SAR260301, GSK2636771, BAY1082439, PQR309, acalisib	5291	74769	85243
PIK3R1	phosphoinositide-3-kinase, regulatory subunit 1 (alpha)	P26450	-1.338	1.31E-09	9.40E-08	1,2	Cytoplasm	kinase			5295	18708	25513
PLXND1	plexin D1	Q3UH93	1.464	1.91E-07	9.50E-06	2	Plasma Membrane	transmembrane receptor			23129	67784	312652
PNCK	pregnancy up-regulated nonubiquitous CaM kinase	Q9QYK9	1.802	9.86E-11	8.22E-09		Other	kinase			139728	93843	29660
PPM1E	protein phosphatase, Mg2+/Mn2+ dependent, 1E	Q80TL0	-1.781	3.16E-13	3.15E-11	1	Nucleus	phosphatase			22843	320472	360593
Ppp1cc	protein phosphatase 1, catalytic subunit, gamma isoform	P63087-2	1.028	8.94E-01	9.80E-01	2	Cytoplasm	phosphatase				19047	24669
PPP1R1B	protein phosphatase 1, regulatory (inhibitor) subunit 1B	Q60829	1.521	8.35E-03	9.04E-02	3	Cytoplasm	phosphatase			84152	19049	360616
PPP3CA	protein phosphatase 3, catalytic subunit, alpha isozyme	P63328	1.195	6.37E-02	3.40E-01	4	Cytoplasm	phosphatase		voclosporin, tacrolimus, pimecrolimus, cyclosporin A	5530	19055	24674
PRKAR2B	protein kinase, cAMP-dependent, regulatory, type II, beta	P31324	1.403	1.15E-05	3.58E-04	5	Cytoplasm	kinase			5577	19088	24679
PRKCG	protein kinase C, gamma	P63318	-1.480	3.45E-22	8.35E-20	3	Cytoplasm	kinase		ingenol mebutate	5582	18752	24681
PRNP	prion protein	P04925	-1.056	5.35E-01	8.50E-01	5	Plasma Membrane	other			5621	19122	24686
PSME3	proteasome (prosome, macropain) activator subunit 3 (PA28 gamma; Ki)	P61290	1.427	7.82E-09	5.10E-07		Cytoplasm	peptidase			10197	19192	287716
PTF1A	pancreas specific transcription factor, 1a	--					Nucleus	transcription regulator			256297	19213	117034
PVALB	parvalbumin	P32848	-2.464	8.24E-31	3.79E-28	1	Cytoplasm	other	unspecified application		5816	19293	25269
quinolinic acid	--	--					Other	chemical - endogenous mammalian
RAB6A	RAB6A, member RAS oncogene family	P35279	-2.020	1.05E-06	4.32E-05	3	Cytoplasm	enzyme			5870	19346	84379
RABIF	RAB interacting factor	Q91X96	-1.480	1.39E-07	7.34E-06		Other	transporter			5877	98710	499636|304807
RET	ret proto-oncogene	--					Plasma Membrane	kinase	efficacy,response to therapy	sunitinib, motesanib, cabozantinib, regorafenib, ponatinib, bortezomib/sorafenib, dexamethasone/lenalidomide/sorafenib, bevacizumab/sorafenib, imatinib/sirolimus, cabozantinib/erlotinib, imatinib/nilotinib/pegintron, cytarabine/idarubicin/sorafenib, 5-azacytidine/sorafenib, decitabine/sorafenib, MGCD516, imatinib, sorafenib, vandetanib	5979	19713	24716
RGS20	regulator of G-protein signaling 20	Q9QZB1	1.861	2.05E-09	1.38E-07		Cytoplasm	other			8601	58175	362477
RPL12	ribosomal protein L12	P35979	-1.578	1.15E-05	3.58E-04	3	Nucleus	other			6136	269261	102555453|499782
RPL28	ribosomal protein L28	P41105	-6.233	2.79E-11	2.49E-09		Cytoplasm	other			6158	19943	64638
RPS6KA3	ribosomal protein S6 kinase, 90kDa, polypeptide 3	P18654	1.126	3.54E-01	7.46E-01	2	Cytoplasm	kinase			6197	110651	501560
RPS6KA5	ribosomal protein S6 kinase, 90kDa, polypeptide 5	Q8C050-2	1.209	1.45E-01	5.20E-01	3	Nucleus	kinase			9252	73086
S100B	S100 calcium binding protein B	P50114	1.042	8.78E-01	9.77E-01	4	Cytoplasm	other	diagnosis,efficacy		6285	20203	25742
SERPINA3	serpin peptidase inhibitor, clade A (alpha-1 antiproteinase, antitrypsin), member 3	P07759	-3.188	8.95E-31	3.79E-28	4	Extracellular Space	other	unspecified application		12	16625|20717|20714|20716	24795
SERPINC1	serpin peptidase inhibitor, clade C (antithrombin), member 1	P32261	-6.102	6.64E-34	3.75E-31	5	Extracellular Space	enzyme	diagnosis,unspecified application	dalteparin, heparin, enoxaparin, ardeparin, SR-123781A, glucuronyl glucosamine glycan sulfate, fondaparinux, nadroparin	462	11905	304917
SERPINF2	serpin peptidase inhibitor, clade F (alpha-2 antiplasmin, pigment epithelium derived factor), member 2	Q61247	-4.441	2.01E-18	3.52E-16	4	Extracellular Space	other			5345	18816	287527
SETD3	SET domain containing 3	Q91WC0	-1.426	4.39E-16	5.88E-14		Nucleus	enzyme			84193	52690	299295
SFXN3	sideroflexin 3	Q91V61	1.555	1.13E-05	3.54E-04	4	Cytoplasm	transporter			81855	94280	65042
SHANK3	SH3 and multiple ankyrin repeat domains 3	Q4ACU6	1.463	5.85E-11	5.05E-09	1	Plasma Membrane	other			85358	58234	59312
SIAH1	siah E3 ubiquitin protein ligase 1	--					Nucleus	enzyme			6477	20437	140941
SLC17A7	solute carrier family 17 (vesicular glutamate transporter), member 7	Q3TXX4	1.086	6.25E-01	8.95E-01		Plasma Membrane	transporter			57030	72961	116638
SLC18A2	solute carrier family 18 (vesicular monoamine transporter), member 2	Q8BRU6	1.544	3.95E-03	5.02E-02	1	Plasma Membrane	transporter		deserpidine/methyclothiazide, deserpidine, secologanin tryptamine alkaloid derivative, methamphetamine, amphetamine, tetrabenazine, reserpine/trichloromethiazide, chlorothiazide/reserpine, chlorthalidone/reserpine, hydralazine/hydrochlorothiazide/reserpine, hydroflumethiazide/reserpine, polythiazide/reserpine, hydrochlorothiazide/reserpine, N-methyl-3,4-methylenedioxyamphetamine, reserpine	6571	214084	25549
SLC1A2	solute carrier family 1 (glial high affinity glutamate transporter), member 2	P43006	1.768	5.57E-14	6.02E-12	2,4	Plasma Membrane	transporter		riluzole	6506	20511	29482
SLC1A3	solute carrier family 1 (glial high affinity glutamate transporter), member 3	P56564	2.370	7.83E-14	8.30E-12	2	Plasma Membrane	transporter		riluzole	6507	20512	29483
SLC25A5	solute carrier family 25 (mitochondrial carrier; adenine nucleotide translocator), member 5	P51881	1.363	1.43E-06	5.59E-05	4	Cytoplasm	transporter		clodronic acid	292	11740	25176
SLC25A11	solute carrier family 25 (mitochondrial carrier; oxoglutarate carrier), member 11	Q9CR62	1.880	1.67E-14	2.02E-12		Cytoplasm	transporter			8402	67863	64201
SLC25A12	solute carrier family 25 (aspartate/glutamate carrier), member 12	Q8BH59	1.596	1.56E-58	1.58E-55		Cytoplasm	transporter			8604	78830
SLC4A4	solute carrier family 4 (sodium bicarbonate cotransporter), member 4	O88343	1.900	1.69E-06	6.50E-05	4	Plasma Membrane	transporter			8671	54403	84484
SLC6A3	solute carrier family 6 (neurotransmitter transporter), member 3	Q61327	2.497	4.61E-08	2.63E-06	3	Plasma Membrane	transporter		acetaminophen/clemastine/pseudoephedrine, acetaminophen/dexbrompheniramine/pseudoephedrine, dexbrompheniramine/pseudoephedrine, chlorpheniramine/ibuprofen/pseudoephedrine, cetirizine/pseudoephedrine, lisdexamfetamine, DOV-102,677, armodafinil, phentermine/topiramate, ioflupane I-123, hydrocodone/pseudoephedrine, bupropion/naltrexone, fexofenadine/pseudoephedrine, fenfluramine/phentermine, loratad…	6531	13162	24898
SLIT2	slit guidance ligand 2	--				4	Extracellular Space	other	diagnosis		9353	20563	360272
SNCA	synuclein, alpha (non A4 component of amyloid precursor)	O55042-2	1.305	1.30E-01	4.93E-01	3	Cytoplasm	other	diagnosis,disease progression,prognosis		6622	20617	29219
SNCB	synuclein, beta	Q91ZZ3	1.210	6.74E-01	9.09E-01	1	Cytoplasm	other			6620	104069	113893
SPTAN1	spectrin, alpha, non-erythrocytic 1	P16546-2	1.583	4.89E-07	2.14E-05	3	Plasma Membrane	other			6709	20740	64159
SQSTM1	sequestosome 1	Q64337-2	-1.611	9.16E-02	4.16E-01		Cytoplasm	transcription regulator			8878	18412	113894
STK26	serine/threonine protein kinase 26	Q99JT2	2.325	3.16E-05	8.92E-04		Nucleus	kinase			51765	70415	317589
STMN1	stathmin 1	P54227	-1.173	4.73E-01	8.17E-01	5	Cytoplasm	other	efficacy		3925	16765	29332
STX6	syntaxin 6	Q9JKK1-2	1.983	1.22E-07	6.60E-06	6	Cytoplasm	transporter			10228	58244	60562
SULT4A1	sulfotransferase family 4A, member 1	P63046	-1.358	2.13E-06	7.98E-05		Cytoplasm	enzyme	efficacy		25830	29859	58953
SYN1	synapsin I	O88935-1	1.348	3.44E-01	7.40E-01	1	Plasma Membrane	transporter			6853	20964	24949
TECR	trans-2,3-enoyl-CoA reductase	Q9CY27	1.403	1.66E-07	8.60E-06		Plasma Membrane	enzyme			9524	106529	191576
TF	transferrin	Q921I1	-1.833	2.46E-07	1.16E-05	4	Extracellular Space	transporter	efficacy,prognosis	ferric carboxymaltose	7018	22041	24825
TGFA	transforming growth factor, alpha	--				2	Extracellular Space	growth factor	efficacy,response to therapy		7039	21802	24827
TH	tyrosine hydroxylase	P24529	1.435	3.10E-06	1.13E-04	1	Cytoplasm	enzyme		tyrosine hydroxylase inhibitor, 5,6,7,8-tetrahydrobiopterin	7054	21823	25085
TMOD1	tropomodulin 1	P49813	1.525	5.97E-25	1.79E-22		Cytoplasm	enzyme			7111	21916	25566
TMSB10/TMSB4X	thymosin beta 10	P62329	4.609	6.14E-17	8.93E-15		Cytoplasm	other	diagnosis		9168|7114	100042318	81814|50665
TNF	tumor necrosis factor	--					Extracellular Space	cytokine	diagnosis,disease progression,efficacy,prognosis,response to therapy,safety,unspecified application	adalimumab, etanercept, infliximab, certolizumab, golimumab, infliximab/methotrexate, dexamethasone/thalidomide, dexamethasone/pomalidomide, cyclophosphamide/dexamethasone/thalidomide, golimumab/methotrexate, bortezomib/dexamethasone/thalidomide, rituximab/thalidomide, bortezomib/thalidomide, prednisone/thalidomide, adalimumab/methotrexate, pomalidomide, thalidomide	7124	21926	24835
TNFSF10	tumor necrosis factor (ligand) superfamily, member 10	--				4	Extracellular Space	cytokine	efficacy		8743	22035	246775
TNR	tenascin R	Q8BYI9	-1.251	1.09E-02	1.12E-01		Plasma Membrane	other			7143	21960	25567
TOR1B	torsin family 1, member B (torsin B)	Q9ER41	-1.443	1.68E-20	3.57E-18		Cytoplasm	enzyme			27348	30934	311854
TRIM3	tripartite motif containing 3	Q9R1R2	-1.954	7.63E-11	6.47E-09	4	Cytoplasm	enzyme			10612	55992	83616
TSFM	Ts translation elongation factor, mitochondrial	Q9CZR8	1.307	1.37E-10	1.07E-08	1	Cytoplasm	translation regulator			10102	66399	679068
TTR	transthyretin	P07309	-4.120	2.05E-51	1.73E-48	5	Extracellular Space	transporter	diagnosis,efficacy,prognosis,unspecified application		7276	22139	24856
UBA6	ubiquitin-like modifier activating enzyme 6	Q8C7R4	1.074	6.58E-01	9.05E-01		Cytoplasm	enzyme			55236	231380	305268
UBP1	upstream binding protein 1 (LBP-1a)	Q811S7-2	-1.908	4.63E-07	2.05E-05		Cytoplasm	transcription regulator			7342	22221	301038
VDAC1	voltage-dependent anion channel 1	Q60932-2	1.530	4.23E-09	2.80E-07	1	Cytoplasm	ion channel			7416	22333	83529
VIP	vasoactive intestinal peptide	--					Extracellular Space	other	efficacy		7432	22353	117064
WFS1	Wolfram syndrome 1 (wolframin)	P56695	2.252	1.62E-09	1.14E-07		Cytoplasm	enzyme	diagnosis		7466	22393	83725
YY1	YY1 transcription factor	--				2	Nucleus	transcription regulator			7528	22632	24919
ZNF428	zinc finger protein 428	Q8C1M2	1.931	1.11E-05	3.51E-04		Other	other			126299	232969	361519

## Sheet: CPs
© 2000-2015 QIAGEN. All rights reserved.
Ingenuity Canonical Pathways	-log(p-value)	Ratio	z-score	Molecules
CREB Signaling in Neurons	4.87E00	5.96E-02	0.707	GRM2,PRKAR2B,ADCY5,CAMK2G,GRM5,PIK3R1,GNAL,GRM3,PRKCG
Glutamate Receptor Signaling	4.79E00	1.05E-01	NaN	GRM2,SLC1A2,SLC1A3,GRM5,GRM3,GLS
Neuropathic Pain Signaling In Dorsal Horn Neurons	4.73E00	8.05E-02	0.378	GRM2,PRKAR2B,CAMK2G,GRM5,PIK3R1,GRM3,PRKCG
G-Protein Coupled Receptor Signaling	4.06E00	4.22E-02	NaN	GRM2,PRKAR2B,ADCY5,CAMK2G,CNR1,GRM5,PIK3R1,GNAL,GRM3,PRKCG
Synaptic Long Term Potentiation	3.4E00	5.94E-02	0.816	GRM2,PRKAR2B,CAMK2G,GRM5,GRM3,PRKCG
Huntington's Disease Signaling	2.5E00	3.47E-02	0.000	HSPA2,CACNA1B,GRM5,PIK3R1,PSME3,GLS,PRKCG
cAMP-mediated signaling	2.47E00	3.43E-02	1.134	GRM2,PRKAR2B,ADCY5,CAMK2G,CNR1,GNAL,GRM3
Dopamine Receptor Signaling	2.38E00	5.8E-02	NaN	SLC6A3,PRKAR2B,ADCY5,TH
Synaptic Long Term Depression	2.35E00	4.42E-02	1.342	GRM2,GRM5,GNAL,GRM3,PRKCG
Neuroprotective Role of THOP1 in Alzheimer's Disease	2.32E00	8.33E-02	NaN	PDYN,PRKAR2B,SERPINA3
Gαi Signaling	2.28E00	4.27E-02	0.447	GRM2,PRKAR2B,ADCY5,CNR1,GRM3
eNOS Signaling	2.18E00	4.03E-02	-0.447	HSPA2,PRKAR2B,ADCY5,PIK3R1,PRKCG
Acute Phase Response Signaling	2.08E00	3.82E-02	NaN	TF,SERPINF2,SERPINA3,PIK3R1,TTR
FXR/RXR Activation	2.06E00	4.71E-02	NaN	PCK2,TF,SERPINF2,TTR
Lipoate Biosynthesis and Incorporation II	2.02E00	1E00	NaN	LIAS
Cardiac Hypertrophy Signaling	2.02E00	3.16E-02	1.342	CACNA1E,PRKAR2B,ADCY5,PIK3R1,EIF2B5,GNAL
Mitochondrial Dysfunction	1.99E00	3.62E-02	NaN	NDUFA13,VDAC1,NDUFA2,NDUFS1,GPD2
Nitric Oxide Signaling in the Cardiovascular System	1.99E00	4.49E-02	0.000	CACNA1E,PRKAR2B,PIK3R1,PRKCG
Molecular Mechanisms of Cancer	1.96E00	2.52E-02	NaN	PRKAR2B,ADCY5,CAMK2G,PIK3R1,BID,GNAL,RABIF,PRKCG
Amyotrophic Lateral Sclerosis Signaling	1.95E00	4.4E-02	NaN	CACNA1E,SLC1A2,PIK3R1,BID
PXR/RXR Activation	1.85E00	5.66E-02	NaN	PCK2,HMGCS2,PRKAR2B
Renin-Angiotensin Signaling	1.85E00	4.08E-02	NaN	PRKAR2B,ADCY5,PIK3R1,PRKCG
Corticotropin Releasing Hormone Signaling	1.85E00	4.08E-02	1.000	PRKAR2B,ADCY5,CNR1,PRKCG
P2Y Purigenic Receptor Signaling Pathway	1.79E00	3.92E-02	0.000	PRKAR2B,ADCY5,PIK3R1,PRKCG
Thrombin Signaling	1.73E00	3.12E-02	-2.000	ADCY5,CAMK2G,PIK3R1,GNAL,PRKCG
Role of NFAT in Cardiac Hypertrophy	1.72E00	3.11E-02	-0.447	PRKAR2B,ADCY5,CAMK2G,PIK3R1,PRKCG
Glycerol-3-phosphate Shuttle	1.72E00	5E-01	NaN	GPD2
Glutamine Degradation I	1.72E00	5E-01	NaN	GLS
Melatonin Signaling	1.71E00	5E-02	NaN	PRKAR2B,CAMK2G,PRKCG
Leptin Signaling in Obesity	1.69E00	4.92E-02	NaN	PRKAR2B,ADCY5,PIK3R1
Breast Cancer Regulation by Stathmin1	1.63E00	2.94E-02	NaN	PRKAR2B,ADCY5,CAMK2G,PIK3R1,PRKCG
Coagulation System	1.63E00	8E-02	NaN	SERPINF2,SERPINC1
GNRH Signaling	1.6E00	3.45E-02	0.000	PRKAR2B,ADCY5,CAMK2G,PRKCG
Glycerol Degradation I	1.55E00	3.33E-01	NaN	GPD2
Relaxin Signaling	1.55E00	3.31E-02	NaN	PRKAR2B,ADCY5,PIK3R1,GNAL
GPCR-Mediated Nutrient Sensing in Enteroendocrine Cells	1.54E00	4.29E-02	NaN	PRKAR2B,ADCY5,PRKCG
Melanocyte Development and Pigmentation Signaling	1.52E00	4.23E-02	NaN	PRKAR2B,ADCY5,PIK3R1
Gap Junction Signaling	1.45E00	3.08E-02	NaN	PRKAR2B,ADCY5,PIK3R1,PRKCG
CXCR4 Signaling	1.43E00	3.03E-02	NaN	ADCY5,PIK3R1,GNAL,PRKCG
Catecholamine Biosynthesis	1.42E00	2.5E-01	NaN	TH
EIF2 Signaling	1.42E00	3.01E-02	-2.000	RPL12,RPL28,PIK3R1,EIF2B5
Death Receptor Signaling	1.42E00	3.85E-02	NaN	BID,LMNA,SPTAN1
Docosahexaenoic Acid (DHA) Signaling	1.41E00	6.06E-02	NaN	PIK3R1,BID
α-Adrenergic Signaling	1.4E00	3.8E-02	NaN	PRKAR2B,ADCY5,PRKCG
Apoptosis Signaling	1.39E00	3.75E-02	NaN	BID,LMNA,SPTAN1
G Beta Gamma Signaling	1.38E00	3.7E-02	NaN	PRKAR2B,GNAL,PRKCG
Endothelin-1 Signaling	1.37E00	2.9E-02	-1.000	ADCY5,PIK3R1,GNAL,PRKCG
Dopamine-DARPP32 Feedback in cAMP Signaling	1.37E00	2.9E-02	1.000	CACNA1E,PRKAR2B,ADCY5,PRKCG
Xenobiotic Metabolism Signaling	1.36E00	2.49E-02	NaN	SULT4A1,CAMK2G,PIK3R1,NQO1,PRKCG
Glioma Signaling	1.34E00	3.57E-02	NaN	CAMK2G,PIK3R1,PRKCG
Oxidative Phosphorylation	1.34E00	3.57E-02	NaN	NDUFA13,NDUFA2,NDUFS1
LXR/RXR Activation	1.31E00	3.49E-02	NaN	TF,SERPINF2,TTR
IL-1 Signaling	1.31E00	3.49E-02	NaN	PRKAR2B,ADCY5,GNAL
CDK5 Signaling	1.27E00	3.37E-02	NaN	PRKAR2B,ADCY5,GNAL
Citrulline Biosynthesis	1.25E00	1.67E-01	NaN	GLS
Protein Kinase A Signaling	1.2E00	2.03E-02	0.000	HIST1H1D,PRKAR2B,ADCY5,CAMK2G,TH,PRKCG
Cellular Effects of Sildenafil (Viagra)	1.2E00	3.12E-02	NaN	CACNA1E,PRKAR2B,ADCY5
Superoxide Radicals Degradation	1.19E00	1.43E-01	NaN	NQO1
Androgen Signaling	1.15E00	3E-02	NaN	PRKAR2B,GNAL,PRKCG
RAR Activation	1.14E00	2.44E-02	NaN	PRKAR2B,ADCY5,PIK3R1,PRKCG
Type II Diabetes Mellitus Signaling	1.14E00	2.97E-02	NaN	PIK3R1,ACSL6,PRKCG
Ketogenesis	1.13E00	1.25E-01	NaN	HMGCS2
Leucine Degradation I	1.13E00	1.25E-01	NaN	BCAT1
Thrombopoietin Signaling	1.13E00	4.26E-02	NaN	PIK3R1,PRKCG
UVB-Induced MAPK Signaling	1.13E00	4.26E-02	NaN	PIK3R1,PRKCG
Gαs Signaling	1.12E00	2.91E-02	NaN	PRKAR2B,ADCY5,CNR1
Isoleucine Degradation I	1.08E00	1.11E-01	NaN	BCAT1
ErbB4 Signaling	1.07E00	3.92E-02	NaN	PIK3R1,PRKCG
Myc Mediated Apoptosis Signaling	1.06E00	3.85E-02	NaN	PIK3R1,BID
Granzyme A Signaling	1.04E00	1E-01	NaN	HIST1H1D
Extrinsic Prothrombin Activation Pathway	1.04E00	1E-01	NaN	SERPINC1
Fatty Acid Activation	1.04E00	1E-01	NaN	ACSL6
Mevalonate Pathway I	1.04E00	1E-01	NaN	HMGCS2
Induction of Apoptosis by HIV1	1.01E00	3.64E-02	NaN	SLC25A5,BID
Insulin Receptor Signaling	1.01E00	2.61E-02	NaN	PRKAR2B,PIK3R1,EIF2B5
Erythropoietin Signaling	1E00	3.57E-02	NaN	PIK3R1,PRKCG
GM-CSF Signaling	1E00	3.57E-02	NaN	CAMK2G,PIK3R1
Cardiac β-adrenergic Signaling	9.87E-01	2.54E-02	NaN	CACNA1E,PRKAR2B,ADCY5
Aldosterone Signaling in Epithelial Cells	9.79E-01	2.52E-02	NaN	HSPA2,PIK3R1,PRKCG
Growth Hormone Signaling	9.76E-01	3.45E-02	NaN	PIK3R1,PRKCG
Macropinocytosis Signaling	9.76E-01	3.45E-02	NaN	PIK3R1,PRKCG
Superpathway of Citrulline Metabolism	9.64E-01	8.33E-02	NaN	GLS
Valine Degradation I	9.64E-01	8.33E-02	NaN	BCAT1
Superpathway of Geranylgeranyldiphosphate Biosynthesis I (via Mevalonate)	9.64E-01	8.33E-02	NaN	HMGCS2
GPCR-Mediated Integration of Enteroendocrine Signaling Exemplified by an L Cell	9.52E-01	3.33E-02	NaN	PRKAR2B,ADCY5
γ-linolenate Biosynthesis II (Animals)	9.31E-01	7.69E-02	NaN	ACSL6
IL-3 Signaling	9.28E-01	3.23E-02	NaN	PIK3R1,PRKCG
HER-2 Signaling in Breast Cancer	9.28E-01	3.23E-02	NaN	PIK3R1,PRKCG
VEGF Family Ligand-Receptor Interactions	9.28E-01	3.23E-02	NaN	PIK3R1,PRKCG
Small Cell Lung Cancer Signaling	9.17E-01	3.17E-02	NaN	PIK3R1,BID
Tec Kinase Signaling	9.17E-01	2.36E-02	NaN	PIK3R1,GNAL,PRKCG
NF-κB Activation by Viruses	9.05E-01	3.12E-02	NaN	PIK3R1,PRKCG
Glutathione Redox Reactions I	9.01E-01	7.14E-02	NaN	GPX3
Mitochondrial L-carnitine Shuttle Pathway	9.01E-01	7.14E-02	NaN	ACSL6
Gαq Signaling	8.95E-01	2.31E-02	NaN	GRM5,PIK3R1,PRKCG
Prolactin Signaling	8.94E-01	3.08E-02	NaN	PIK3R1,PRKCG
LPS-stimulated MAPK Signaling	8.84E-01	3.03E-02	NaN	PIK3R1,PRKCG
Granzyme B Signaling	8.73E-01	6.67E-02	NaN	BID
Polyamine Regulation in Colon Cancer	8.47E-01	6.25E-02	NaN	PSME3
Natural Killer Cell Signaling	8.33E-01	2.82E-02	NaN	PIK3R1,PRKCG
Reelin Signaling in Neurons	8.33E-01	2.82E-02	NaN	CNR1,PIK3R1
Hepatic Cholestasis	8.26E-01	2.14E-02	NaN	PRKAR2B,ADCY5,PRKCG
FAK Signaling	8.04E-01	2.7E-02	NaN	PIK3R1,ARHGAP26
phagosome formation	8.04E-01	2.7E-02	NaN	PIK3R1,PRKCG
Maturity Onset Diabetes of Young (MODY) Signaling	8E-01	5.56E-02	NaN	CACNA1E
Virus Entry via Endocytic Pathways	7.95E-01	2.67E-02	NaN	PIK3R1,PRKCG
ErbB Signaling	7.95E-01	2.67E-02	NaN	PIK3R1,PRKCG
Sertoli Cell-Sertoli Cell Junction Signaling	7.94E-01	2.07E-02	NaN	PRKAR2B,MPP6,SPTAN1
VEGF Signaling	7.86E-01	2.63E-02	NaN	PIK3R1,EIF2B5
Neuregulin Signaling	7.77E-01	2.6E-02	NaN	PIK3R1,PRKCG
Fcγ Receptor-mediated Phagocytosis in Macrophages and Monocytes	7.77E-01	2.6E-02	NaN	PIK3R1,PRKCG
NRF2-mediated Oxidative Stress Response	7.7E-01	2.01E-02	NaN	PIK3R1,NQO1,PRKCG
Calcium Signaling	7.64E-01	2E-02	NaN	PRKAR2B,CAMK2G,PNCK
Tumoricidal Function of Hepatic Natural Killer Cells	7.58E-01	5E-02	NaN	BID
PPARα/RXRα Activation	7.58E-01	1.99E-02	NaN	PRKAR2B,ADCY5,GPD2
ERK/MAPK Signaling	7.46E-01	1.96E-02	NaN	PRKAR2B,PIK3R1,PRKCG
Intrinsic Prothrombin Activation Pathway	7.39E-01	4.76E-02	NaN	SERPINC1
Cytotoxic T Lymphocyte-mediated Apoptosis of Target Cells	7.21E-01	4.55E-02	NaN	BID
Fatty Acid β-oxidation I	7.21E-01	4.55E-02	NaN	ACSL6
Role of p14/p19ARF in Tumor Suppression	7.21E-01	4.55E-02	NaN	PIK3R1
AMPK Signaling	7.13E-01	1.89E-02	NaN	PCK2,PRKAR2B,PIK3R1
iCOS-iCOSL Signaling in T Helper Cells	7.11E-01	2.35E-02	NaN	CAMK2G,PIK3R1
Gustation Pathway	7.04E-01	2.33E-02	NaN	PRKAR2B,ADCY5
Fc Epsilon RI Signaling	6.96E-01	2.3E-02	NaN	PIK3R1,PRKCG
PKCθ Signaling in T Lymphocytes	6.96E-01	2.3E-02	NaN	CAMK2G,PIK3R1
LPS/IL-1 Mediated Inhibition of RXR Function	6.86E-01	1.83E-02	NaN	HMGCS2,SULT4A1,ACSL6
IGF-1 Signaling	6.81E-01	2.25E-02	NaN	PRKAR2B,PIK3R1
Superpathway of Cholesterol Biosynthesis	6.71E-01	4E-02	NaN	HMGCS2
Sonic Hedgehog Signaling	6.71E-01	4E-02	NaN	PRKAR2B
HGF Signaling	6.67E-01	2.2E-02	NaN	PIK3R1,PRKCG
Sphingosine-1-phosphate Signaling	6.67E-01	2.2E-02	NaN	ADCY5,PIK3R1
IL-9 Signaling	6.56E-01	3.85E-02	NaN	PIK3R1
Sperm Motility	6.53E-01	2.15E-02	NaN	PRKAR2B,PRKCG
14-3-3-mediated Signaling	6.46E-01	2.13E-02	NaN	PIK3R1,PRKCG
Rac Signaling	6.46E-01	2.13E-02	NaN	PIK3R1,BRK1
Dermatan Sulfate Biosynthesis (Late Stages)	6.42E-01	3.7E-02	NaN	SULT4A1
Stearate Biosynthesis I (Animals)	6.42E-01	3.7E-02	NaN	ACSL6
Actin Cytoskeleton Signaling	6.37E-01	1.72E-02	NaN	PIK3R1,BRK1,TMSB10/TMSB4X
fMLP Signaling in Neutrophils	6.2E-01	2.04E-02	NaN	PIK3R1,PRKCG
IL-12 Signaling and Production in Macrophages	6.14E-01	2.02E-02	NaN	PIK3R1,PRKCG
Role of Pattern Recognition Receptors in Recognition of Bacteria and Viruses	6.14E-01	2.02E-02	NaN	PIK3R1,PRKCG
p70S6K Signaling	6.14E-01	2.02E-02	NaN	PIK3R1,PRKCG
CCR3 Signaling in Eosinophils	6.07E-01	2E-02	NaN	PIK3R1,PRKCG
TWEAK Signaling	6.02E-01	3.33E-02	NaN	BID
Chondroitin Sulfate Biosynthesis (Late Stages)	6.02E-01	3.33E-02	NaN	SULT4A1
Heparan Sulfate Biosynthesis (Late Stages)	5.78E-01	3.12E-02	NaN	SULT4A1
PI3K Signaling in B Lymphocytes	5.77E-01	1.9E-02	NaN	CAMK2G,PIK3R1
Estrogen Receptor Signaling	5.72E-01	1.89E-02	NaN	PCK2,PHB2
FcγRIIB Signaling in B Lymphocytes	5.55E-01	2.94E-02	NaN	PIK3R1
Axonal Guidance Signaling	5.47E-01	1.34E-02	NaN	PLXND1,PRKAR2B,PIK3R1,GNAL,PRKCG
Role of PKR in Interferon Induction and Antiviral Response	5.45E-01	2.86E-02	NaN	BID
Retinoic acid Mediated Apoptosis Signaling	5.45E-01	2.86E-02	NaN	BID
Ovarian Cancer Signaling	5.44E-01	1.8E-02	NaN	PRKAR2B,PIK3R1
Mechanisms of Viral Exit from Host Cells	5.34E-01	2.78E-02	NaN	PRKCG
Chondroitin Sulfate Biosynthesis	5.34E-01	2.78E-02	NaN	SULT4A1
Melanoma Signaling	5.25E-01	2.7E-02	NaN	PIK3R1
Netrin Signaling	5.25E-01	2.7E-02	NaN	PRKAR2B
Heparan Sulfate Biosynthesis	5.25E-01	2.7E-02	NaN	SULT4A1
Phototransduction Pathway	5.25E-01	2.7E-02	NaN	PRKAR2B
Regulation of eIF4 and p70S6K Signaling	5.23E-01	1.74E-02	NaN	PIK3R1,EIF2B5
MSP-RON Signaling Pathway	5.15E-01	2.63E-02	NaN	PIK3R1
Dermatan Sulfate Biosynthesis	5.15E-01	2.63E-02	NaN	SULT4A1
Serotonin Receptor Signaling	5.06E-01	2.56E-02	NaN	ADCY5
Role of PI3K/AKT Signaling in the Pathogenesis of Influenza	4.96E-01	2.5E-02	NaN	PIK3R1
Colorectal Cancer Metastasis Signaling	4.93E-01	1.44E-02	NaN	PRKAR2B,ADCY5,PIK3R1
UVC-Induced MAPK Signaling	4.88E-01	2.44E-02	NaN	PRKCG
CNTF Signaling	4.79E-01	2.38E-02	NaN	PIK3R1
Ephrin A Signaling	4.79E-01	2.38E-02	NaN	PIK3R1
CD27 Signaling in Lymphocytes	4.63E-01	2.27E-02	NaN	BID
TNFR1 Signaling	4.63E-01	2.27E-02	NaN	BID
nNOS Signaling in Neurons	4.55E-01	2.22E-02	NaN	PRKCG
Lymphotoxin β Receptor Signaling	4.47E-01	2.17E-02	NaN	PIK3R1
Endometrial Cancer Signaling	4.47E-01	2.17E-02	NaN	PIK3R1
Role of IL-17A in Arthritis	4.47E-01	2.17E-02	NaN	PIK3R1
Unfolded protein response	4.47E-01	2.17E-02	NaN	HSPA2
IL-2 Signaling	4.47E-01	2.17E-02	NaN	PIK3R1
Role of NFAT in Regulation of the Immune Response	4.4E-01	1.5E-02	NaN	PIK3R1,GNAL
Calcium-induced T Lymphocyte Apoptosis	4.4E-01	2.13E-02	NaN	PRKCG
ErbB2-ErbB3 Signaling	4.4E-01	2.13E-02	NaN	PIK3R1
Amyloid Processing	4.33E-01	2.08E-02	NaN	PRKAR2B
Tight Junction Signaling	4.28E-01	1.47E-02	NaN	PRKAR2B,SPTAN1
ATM Signaling	4.26E-01	2.04E-02	NaN	BID
Estrogen-Dependent Breast Cancer Signaling	4.19E-01	2E-02	NaN	PIK3R1
EGF Signaling	4.19E-01	2E-02	NaN	PIK3R1
B Cell Receptor Signaling	4.13E-01	1.43E-02	NaN	CAMK2G,PIK3R1
Glioma Invasiveness Signaling	4.12E-01	1.96E-02	NaN	PIK3R1
Glucocorticoid Receptor Signaling	4.1E-01	1.28E-02	NaN	PCK2,HSPA2,PIK3R1
IL-17A Signaling in Airway Cells	4.06E-01	1.92E-02	NaN	PIK3R1
Production of Nitric Oxide and Reactive Oxygen Species in Macrophages	3.98E-01	1.39E-02	NaN	PIK3R1,PRKCG
ILK Signaling	3.98E-01	1.39E-02	NaN	PIK3R1,TMSB10/TMSB4X
Role of JAK1 and JAK3 in γc Cytokine Signaling	3.93E-01	1.85E-02	NaN	PIK3R1
Antiproliferative Role of Somatostatin Receptor 2	3.87E-01	1.82E-02	NaN	PIK3R1
Hypoxia Signaling in the Cardiovascular System	3.81E-01	1.79E-02	NaN	NQO1
Role of Macrophages, Fibroblasts and Endothelial Cells in Rheumatoid Arthritis	3.77E-01	1.21E-02	NaN	CAMK2G,PIK3R1,PRKCG
CD40 Signaling	3.75E-01	1.75E-02	NaN	PIK3R1
IL-15 Signaling	3.75E-01	1.75E-02	NaN	PIK3R1
Non-Small Cell Lung Cancer Signaling	3.75E-01	1.75E-02	NaN	PIK3R1
Angiopoietin Signaling	3.64E-01	1.69E-02	NaN	PIK3R1
FLT3 Signaling in Hematopoietic Progenitor Cells	3.64E-01	1.69E-02	NaN	PIK3R1
GDNF Family Ligand-Receptor Interactions	3.64E-01	1.69E-02	NaN	PIK3R1
Neurotrophin/TRK Signaling	3.64E-01	1.69E-02	NaN	PIK3R1
mTOR Signaling	3.63E-01	1.3E-02	NaN	PIK3R1,PRKCG
Clathrin-mediated Endocytosis Signaling	3.6E-01	1.29E-02	NaN	TF,PIK3R1
CCR5 Signaling in Macrophages	3.58E-01	1.67E-02	NaN	PRKCG
IL-4 Signaling	3.58E-01	1.67E-02	NaN	PIK3R1
Chemokine Signaling	3.58E-01	1.67E-02	NaN	CAMK2G
Caveolar-mediated Endocytosis Signaling	3.53E-01	1.64E-02	NaN	FLOT1
IL-17 Signaling	3.53E-01	1.64E-02	NaN	PIK3R1
JAK/Stat Signaling	3.53E-01	1.64E-02	NaN	PIK3R1
CTLA4 Signaling in Cytotoxic T Lymphocytes	3.48E-01	1.61E-02	NaN	PIK3R1
Crosstalk between Dendritic Cells and Natural Killer Cells	3.48E-01	1.61E-02	NaN	CAMK2G
Renal Cell Carcinoma Signaling	3.43E-01	1.59E-02	NaN	PIK3R1
PEDF Signaling	3.43E-01	1.59E-02	NaN	PIK3R1
GABA Receptor Signaling	3.43E-01	1.59E-02	NaN	ADCY5
Leukocyte Extravasation Signaling	3.29E-01	1.21E-02	NaN	PIK3R1,PRKCG
PDGF Signaling	3.28E-01	1.52E-02	NaN	PIK3R1
IL-8 Signaling	3.26E-01	1.2E-02	NaN	PIK3R1,PRKCG
Ceramide Signaling	3.24E-01	1.49E-02	NaN	PIK3R1
Acute Myeloid Leukemia Signaling	3.24E-01	1.49E-02	NaN	PIK3R1
BMP signaling pathway	3.24E-01	1.49E-02	NaN	PRKAR2B
Integrin Signaling	3.21E-01	1.19E-02	NaN	PIK3R1,ARHGAP26
UVA-Induced MAPK Signaling	3.19E-01	1.47E-02	NaN	PIK3R1
STAT3 Pathway	3.19E-01	1.47E-02	NaN	NDUFA13
Ephrin B Signaling	3.15E-01	1.45E-02	NaN	GNAL
Prostate Cancer Signaling	3.06E-01	1.41E-02	NaN	PIK3R1
FGF Signaling	2.97E-01	1.37E-02	NaN	PIK3R1
T Cell Receptor Signaling	2.97E-01	1.37E-02	NaN	PIK3R1
VDR/RXR Activation	2.93E-01	1.35E-02	NaN	PRKCG
Factors Promoting Cardiogenesis in Vertebrates	2.89E-01	1.33E-02	NaN	PRKCG
RANK Signaling in Osteoclasts	2.89E-01	1.33E-02	NaN	PIK3R1
TR/RXR Activation	2.85E-01	1.32E-02	NaN	PIK3R1
PAK Signaling	2.85E-01	1.32E-02	NaN	PIK3R1
Mouse Embryonic Stem Cell Pluripotency	2.74E-01	1.27E-02	NaN	PIK3R1
Phospholipase C Signaling	2.74E-01	1.08E-02	NaN	ADCY5,PRKCG
Chronic Myeloid Leukemia Signaling	2.7E-01	1.25E-02	NaN	PIK3R1
SAPK/JNK Signaling	2.67E-01	1.23E-02	NaN	PIK3R1
p53 Signaling	2.6E-01	1.2E-02	NaN	PIK3R1
Paxillin Signaling	2.56E-01	1.19E-02	NaN	PIK3R1
Telomerase Signaling	2.56E-01	1.19E-02	NaN	PIK3R1
Signaling by Rho Family GTPases	2.43E-01	1E-02	NaN	PIK3R1,GNAL
HIF1α Signaling	2.4E-01	1.12E-02	NaN	PIK3R1
Role of NANOG in Mammalian Embryonic Stem Cell Pluripotency	2.37E-01	1.11E-02	NaN	PIK3R1
CD28 Signaling in T Helper Cells	2.34E-01	1.1E-02	NaN	PIK3R1
Cholecystokinin/Gastrin-mediated Signaling	2.34E-01	1.1E-02	NaN	PRKCG
Type I Diabetes Mellitus Signaling	2.34E-01	1.1E-02	NaN	BID
NGF Signaling	2.34E-01	1.1E-02	NaN	PIK3R1
Role of Tissue Factor in Cancer	2.28E-01	1.08E-02	NaN	PIK3R1
Pancreatic Adenocarcinoma Signaling	2.25E-01	1.06E-02	NaN	PIK3R1
Gα12/13 Signaling	2.2E-01	1.04E-02	NaN	PIK3R1
Hereditary Breast Cancer Signaling	2.12E-01	1.01E-02	NaN	PIK3R1
IL-6 Signaling	2.04E-01	9.8E-03	NaN	PIK3R1

## Sheet: upstream
© 2000-2015 QIAGEN. All rights reserved.
Upstream Regulator	Exp Fold Change	Molecule Type	Predicted Activation State	Activation z-score	p-value of overlap	Target molecules in dataset	Mechanistic Network
GRM3	1.656	g-protein coupled receptor			3.04E-06	GRM2,SLC1A2,SLC1A3
HTT	1.068	transcription regulator		-1.842	5.26E-06	ADCY5,BID,CNR1,GNAL,GPX3,GRM2,GRM3,KCNIP2,PRKCG,PVALB,SERPINA3,SLC1A2,SLC1A3,SPTAN1,TH
L-dopa		chemical - endogenous mammalian	Activated	3.664	7.05E-05	AGFG2,CBR3,CNR1,ERLIN1,GPD2,LMNA,MPP6,MYO1B,PDYN,PIK3R1,PVALB,SFXN3,SHANK3,SLC1A2,TH,VDAC1
DRD3		g-protein coupled receptor			2.51E-04	SLC6A3,TH
NR4A2		ligand-dependent nuclear receptor			4.73E-04	SLC6A3,TH,TSFM
RET		kinase			8.28E-04	SLC6A3,TH
ASCL1		transcription regulator		1.980	1.06E-03	GRM5,KCNIP2,PDYN,TH
PAX2		transcription regulator			1.23E-03	GRM3,GRM5
JAK2		kinase			2.28E-03	GBP2,SLC1A3
PDYN	8.682	transporter			2.28E-03	GRM5,PLXND1
MAPT	-1.010	other			2.87E-03	DBI,PVALB,SLC1A2,SLC1A3,SPTAN1,TH,VDAC1
SLC18A2	1.544	transporter			2.91E-03	SLC6A3,TH
VIP		other			3.61E-03	SLC1A2,SLC1A3
ADAM10		peptidase			4.15E-03	BID,PVALB,SHANK3,TH
BCL11B		other			4.39E-03	KCNIP2,PLXND1
LHX2		transcription regulator			5.24E-03	GNAL,NQO1
Becn2		other			9.22E-03	CNR1
SQSTM1	-1.611	transcription regulator			9.22E-03	NQO1
SLC17A7	1.086	transporter			9.22E-03	SLC1A2
GPRASP1		transporter			9.22E-03	CNR1
TNR	-1.251	other			9.22E-03	SLC1A3
GNG7	1.369	enzyme			9.22E-03	GNAL
DLGAP3	1.508	other			9.22E-03	GRM5
GPX4	-1.336	enzyme			9.22E-03	PVALB
SIAH1		enzyme			9.22E-03	GRM5
CREB1	-1.521	transcription regulator		-1.042	9.50E-03	BRINP2,GLS,GNAL,GRM5,KCNIP2,MYO1B,OSTF1,PDYN
SLC6A3	2.497	transporter			1.05E-02	GNAL,SLC6A3
GDNF		growth factor			1.17E-02	PDYN,TH
MTDH	-1.508	transcription regulator			1.84E-02	SLC1A2
FXR2	-1.854	other			1.84E-02	FXR1
SNCB	1.210	other			1.84E-02	TH
LPAR1		g-protein coupled receptor			1.84E-02	PRKCG
MAP2	-1.314	other			1.84E-02	PRKAR2B
PHOX2B		transcription regulator			1.84E-02	TH
magnesium		chemical - endogenous mammalian			1.84E-02	TH
manganese		chemical - endogenous mammalian			1.84E-02	SLC1A2
ATN1		transcription regulator			2.36E-02	ATP1B2,CNR1,PRKCG,PVALB
dopamine		chemical - endogenous mammalian			2.48E-02	CNR1,SLC1A3,TH
CADPS	-1.147	other			2.74E-02	STX6
UBA6	1.074	enzyme			2.74E-02	SHANK3
JAK1		kinase			2.74E-02	SLC1A3
mir-124		microrna			2.74E-02	SLC1A2
HDAC3	2.186	transcription regulator			2.74E-02	SLC1A2
HDAC7		transcription regulator			2.74E-02	SLC1A2
HDAC6	-1.108	transcription regulator			2.74E-02	SLC1A2
ERBB4		kinase			2.74E-02	SLC6A3
GRM2	1.957	g-protein coupled receptor			2.74E-02	GRM3
KCNIP3		transcription regulator			2.74E-02	PDYN
GFAP	-2.227	other			2.74E-02	SLC1A2
AGT		growth factor			3.10E-02	PIK3R1,TH
CREBBP	1.077	transcription regulator			3.29E-02	CAMK2G,SLC1A2
IL1B		cytokine		-1.981	3.45E-02	SERPINA3,SERPINF2,SLC1A2,SLC1A3
OPRK1		g-protein coupled receptor			3.64E-02	PLXND1
JUND		transcription regulator			3.64E-02	TH
ATF2		transcription regulator			3.64E-02	TH
PTF1A		transcription regulator			3.70E-02	GRM3,GRM5
TNF		cytokine		-1.067	4.04E-02	DBI,GBP2,GLS,SERPINA3,SLC1A2
quinolinic acid		chemical - endogenous mammalian			4.12E-02	PDYN,TH
ADCYAP1		other			4.25E-02	NQO1,SLC1A2,SLC1A3
ADORA2A		g-protein coupled receptor			4.50E-02	PDYN,RAB6A,SLC6A3
TGFA		growth factor			4.53E-02	SLC1A2
ATM		kinase			4.53E-02	SLC6A3
GRM5	1.662	g-protein coupled receptor			4.53E-02	SLC1A2
HOMER2		other			4.53E-02	GRM5
iron		chemical - endogenous mammalian			4.53E-02	NDUFS1
ESR1		ligand-dependent nuclear receptor			4.78E-02	TH,TTR

## Sheet: networks
© 2000-2015 QIAGEN. All rights reserved.
ID	Molecules in Network	Score	Focus Molecules	Top Diseases and Functions
1	3,4-dihydroxyphenylacetic acid,ADAM10,AGFG2,ARC,ATXN1,beta-estradiol,CBR3,CNR1,DRD3,ERLIN1,FOXA1,FOXA2,GDNF,GPD2,HDAC4,HOMER1,ILF3,JUND,L-dopa,LMNA,LZTS3,MPP6,MYO1B,NR4A2,PDYN,PIK3R1,PPM1E,PVALB,SHANK3,SLC18A2,SNCB,SYN1,TH,TSFM,VDAC1	24	17	Behavior, Cell-To-Cell Signaling and Interaction, Drug Metabolism
2	AKT1,AR,BRK1,CAMK2G,CNR1,CREBBP,DAGLA,EGF,GAB1,GDNF,GRM1,GRM2,GRM3,GRM5,HOMER1,HOMER2,KDR,LGALS1,LRRC7,MARK4,MTCH1,MTDH,NQO1,NTN1,PAX6,PDYN,PIK3CB,PIK3R1,PLXND1,Ppp1cc,RPS6KA3,SLC1A2,SLC1A3,TGFA,YY1	24	17	Cell Death and Survival, Behavior, Lipid Metabolism
3	3,4-dihydroxyphenylacetic acid,4-hydroxy-3-methoxyphenylacetic acid,ADCY5,adenosine triphosphate,ATP1A3,BDNF,BID,CACNA1B,CASP2,CX3CL1,DCTN1,DRD3,FSCN1,GNAL,GNG7,GPX3,HMGCS2,HOMER1,HSPA2,HTRA2,HTT,KCNB1,KCNIP2,MTOR,NDUFS1,NSF,NTS,PPP1R1B,PRKCG,RAB6A,RPL12,RPS6KA5,SLC6A3,SNCA,SPTAN1	18	14	Neurological Disease, Psychological Disorders, Skeletal and Muscular Disorders
4	APOE,APP,ARC,CX3CL1,DLG4,DOCK10,ERG,FLOT1,GBP2,GCA,HEY2,HOMER1,IFNG,IL11,IL1B,IL6R,MIF,MYO5A,NGB,NKX2-3,NLGN1,PHACTR1,PHB2,PPP3CA,S100B,SERPINA3,SERPINF2,SFXN3,SLC1A2,SLC25A5,SLC4A4,SLIT2,TF,TNFSF10,TRIM3	18	14	Cell Death and Survival, Cellular Assembly and Organization, Cellular Development
5	APP,ARC,ATP1A2,ATP1A3,ATP1B2,BAX,BRINP2,BSG,CACNA1E,CACNA2D1,CREB1,DBI,EEF2,FMR1,FXR1,FXR2,GLS,GRM1,GRM5,heparan sulfate,HOMER1,HSPG2,ICAM1,L-glutamic acid,MIF,mir-9,mir-124,MYADM,NRP1,OSTF1,PRKAR2B,PRNP,SERPINC1,STMN1,TTR	15	12	Behavior, Neurological Disease, Psychological Disorders
6	CADPS,STX6	2	1	Cellular Assembly and Organization, Cell-To-Cell Signaling and Interaction, Cellular Function and Maintenance

## Sheet: dis and bio
© 2000-2015 QIAGEN. All rights reserved.
Categories	Diseases or Functions Annotation	p-Value	Predicted Activation State	Activation z-score	Molecules	# Molecules
Amino Acid Metabolism, Cell-To-Cell Signaling and Interaction, Molecular Transport, Small Molecule Biochemistry	release of L-glutamic acid	2.15E-05			CACNA1E,CNR1,GRM2,GRM3,SLC1A3	5
Endocrine System Development and Function, Lipid Metabolism, Small Molecule Biochemistry	synthesis of 2-arachidonoylglycerol	2.88E-05			CNR1,DAGLA,GRM5	3
Neurological Disease, Psychological Disorders	Schizophrenia	2.90E-05			CNR1,GRM3,HSPA2,LGALS1,PIK3R1,PRKAR2B,PVALB,TF,TTR,VDAC1	10
Cell-To-Cell Signaling and Interaction, Nervous System Development and Function	long term depression	6.68E-05		1.969	ADCY5,CNR1,GRM2,GRM3,GRM5,LRRC7,PRKCG	7
Cell-To-Cell Signaling and Interaction, Nervous System Development and Function	long term depression of striatum	6.80E-05			ADCY5,CNR1,GRM5	3
Cell-To-Cell Signaling and Interaction, Nervous System Development and Function	long term depression of corticostriatal neurons	9.01E-05			ADCY5,CNR1	2
Cell Morphology, Cellular Compromise	shrinkage of cells	2.25E-04			BID,LMNA,SPTAN1	3
Cell Morphology, Cell-To-Cell Signaling and Interaction, Cellular Function and Maintenance, Nervous System Development and Function	depolarization of postsynaptic neurons	2.69E-04			GRM2,GRM3	2
Cell-To-Cell Signaling and Interaction, Nervous System Development and Function	long term depression of neurons	4.99E-04			ADCY5,CNR1,GRM5,PRKCG	4
Neurological Disease, Psychological Disorders	Dementia	7.13E-04			CNR1,GLS,NQO1,RAB6A,SERPINA3,SLC1A2,SLC1A3,TTR	8
Carbohydrate Metabolism, Molecular Transport, Small Molecule Biochemistry	uptake of 2-deoxyglucose	7.32E-04			PIK3R1,SLC1A2,SLC1A3	3
Embryonic Development, Nervous System Development and Function, Organ Development, Organismal Development, Tissue Development	formation of cerebral neocortex	8.85E-04			SLC1A2,SLC1A3	2
Cell Death and Survival	necrosis	9.97E-04		0.605	BID,CNR1,GRM2,GRM3,GRM5,LGALS1,NQO1,PIK3R1,PRKCG,PSME3,SERPINA3,SERPINC1,SLC1A2,SLC1A3,SLC6A3,TF,TTR,VDAC1,WFS1	19
Cell-To-Cell Signaling and Interaction, Molecular Transport, Small Molecule Biochemistry	quantity of monoamines	1.10E-03		-0.391	CACNA1B,CNR1,GRM5,SLC6A3,TH	5
Cell-To-Cell Signaling and Interaction, Nervous System Development and Function	synaptic transmission	1.15E-03		1.960	CNR1,GLS,GRM2,GRM3,GRM5,NQO1,PRKCG,SHANK3,SLC1A3,VDAC1	10
Cell-To-Cell Signaling and Interaction, Nervous System Development and Function	synaptic transmission of cells	1.25E-03		1.960	CNR1,GLS,GRM2,GRM3,GRM5,PRKCG,SHANK3,SLC1A3,VDAC1	9
Cell Death and Survival	neuronal cell death	1.39E-03		0.625	BID,CNR1,GRM2,GRM3,GRM5,LGALS1,NQO1,PIK3R1,PRKCG,PSME3,SERPINA3,SLC1A2,SLC1A3,SLC6A3,TF,TTR,WFS1	17
Cell-To-Cell Signaling and Interaction, Nervous System Development and Function	activation of neurons	1.59E-03	Decreased	-2.176	CACNA1B,CNR1,GRM2,GRM3,PDYN	5
Cell-To-Cell Signaling and Interaction, Nervous System Development and Function	long term depression of striatal neurons	1.83E-03			CNR1,GRM5	2
Cell-To-Cell Signaling and Interaction, Nervous System Development and Function	long term depression of synapse	2.24E-03		1.698	CNR1,GRM2,GRM5,LRRC7	4
Cellular Development, Cellular Growth and Proliferation, Embryonic Development, Organismal Development, Tissue Development	proliferation of neural stem cells	2.38E-03		0.775	CNR1,LGALS1,SLC1A2,SLC1A3	4
Cell-To-Cell Signaling and Interaction, Nervous System Development and Function	long-term potentiation of striatum	2.43E-03			GRM5,SLC6A3	2
Neurological Disease	dyskinesia	2.48E-03			ADCY5,CNR1,GNAL,MYO1B,PRKCG,RAB6A,SERPINA3,SLC1A3,SLC6A3	9
Cell-To-Cell Signaling and Interaction, Drug Metabolism, Molecular Transport, Small Molecule Biochemistry	concentration of dopamine	2.54E-03		0.084	CNR1,GRM5,SLC6A3,TH	4
Cell-To-Cell Signaling and Interaction, Nervous System Development and Function	neurotransmission	2.65E-03	Increased	2.190	CACNA1B,CNR1,GLS,GRM2,GRM3,GRM5,NQO1,PRKCG,SHANK3,SLC1A3,VDAC1	11
Metabolic Disease, Neurological Disease, Psychological Disorders	Alzheimer's disease	2.77E-03			CNR1,NQO1,RAB6A,SERPINA3,SLC1A2,SLC1A3,TTR	7
Free Radical Scavenging	production of reactive oxygen species	2.86E-03			DBI,NDUFS1,PDYN,VDAC1	4
Amino Acid Metabolism, Molecular Transport, Small Molecule Biochemistry	uptake of L-glutamic acid	3.11E-03			SLC1A2,SLC1A3	2
Cell-To-Cell Signaling and Interaction, Nervous System Development and Function	excitatory postsynaptic potential of neurons	3.21E-03			CNR1,GRM2,GRM5,SHANK3	4
Cell-To-Cell Signaling and Interaction, Nervous System Development and Function	long term depression of brain cells	3.43E-03			ADCY5,CNR1,PRKCG	3
Cell-To-Cell Signaling and Interaction, Nervous System Development and Function	long-term potentiation of synapse	4.26E-03		0.024	CNR1,GRM5,PRKCG,SHANK3,SLC6A3,VDAC1	6
Neurological Disease, Psychological Disorders	bipolar disorder	6.46E-03			COQ7,HMGCS2,PDYN	3
Cell-To-Cell Signaling and Interaction, Nervous System Development and Function	long term depression of cerebellum	6.56E-03			GRM2,PRKCG	2
Amino Acid Metabolism, Small Molecule Biochemistry	synthesis of amino acids	6.56E-03			GLS,TH	2
Neurological Disease	Movement Disorders	6.90E-03			ADCY5,CNR1,GNAL,MYO1B,PRKCG,RAB6A,SERPINA3,SLC1A3,SLC6A3,TH	10
Embryonic Development, Organismal Development, Tissue Development	growth of embryonic tissue	7.89E-03		0.775	ACSL6,CNR1,DAGLA,LGALS1,SLC1A2,SLC1A3	6
Cell Death and Survival	apoptosis of neurons	8.13E-03		0.578	BID,CNR1,GRM2,GRM5,LGALS1,NQO1,PIK3R1,PRKCG,SERPINA3,TTR,WFS1	11
Hereditary Disorder, Neurological Disease, Psychological Disorders, Skeletal and Muscular Disorders	Huntington's Disease	8.25E-03			ADCY5,CNR1,GNAL,MYO1B,PRKCG,RAB6A,SERPINA3,SLC1A3	8
Molecular Transport, Small Molecule Biochemistry	release of catecholamine	8.42E-03			CNR1,SLC6A3,TH	3
Neurological Disease, Psychological Disorders	AIDS dementia complex	9.54E-03			GLS	1
Organismal Injury and Abnormalities	abdominal pain	9.54E-03			GRM5	1
Nervous System Development and Function	abnormal morphology of nociceptor	9.54E-03			LGALS1	1
Cell-To-Cell Signaling and Interaction, Nervous System Development and Function	activation of KNDy neurons	9.54E-03			PDYN	1
Cell-To-Cell Signaling and Interaction, Nervous System Development and Function	activation of serotonergic neurons	9.54E-03			CACNA1B	1
Nervous System Development and Function	adaptation of hair cells	9.54E-03			MYO1B	1
Cell-To-Cell Signaling and Interaction, Cell-mediated Immune Response, Cellular Movement, Hematological System Development and Function, Immune Cell Trafficking	adhesion of memory T lymphocytes	9.54E-03			MYADM	1
Metabolic Disease, Neurological Disease	alkalinization of hippocampal neurons	9.54E-03			SLC4A4	1
Cellular Assembly and Organization	clustering of nuclear pores	9.54E-03			LMNA	1
Neurological Disease, Organismal Injury and Abnormalities	damage of cerebellum	9.54E-03			SLC1A3	1
Organismal Functions	flicking of tail	9.54E-03			PDYN	1
Cellular Growth and Proliferation, Nervous System Development and Function, Tissue Development	generation of cortical neurons	9.54E-03			CNR1	1
Behavior	head twitching behavior	9.54E-03			GRM2	1
Developmental Disorder, Endocrine System Disorders, Organismal Injury and Abnormalities, Reproductive System Disease	hypoplasia of intermediate lobe of the pituitary gland	9.54E-03			SLC6A3	1
Behavior	ingestion of ethanol	9.54E-03			GRM5	1
Cellular Growth and Proliferation, Nervous System Development and Function	inhibition of giant reticular neurons	9.54E-03			GRM3	1
Cell-To-Cell Signaling and Interaction, Nervous System Development and Function	long term depression of excitatory synapses	9.54E-03			CNR1	1
Cell-To-Cell Signaling and Interaction, Nervous System Development and Function	long term depression of medial prefrontal cortex	9.54E-03			GRM3	1
Cell Morphology, Cellular Assembly and Organization, Cellular Development, Cellular Function and Maintenance, Embryonic Development, Nervous System Development and Function, Tissue Development, Tissue Morphology	morphology of synaptic spine	9.54E-03			LRRC7	1
Neurological Disease, Skeletal and Muscular Disorders	muscle spasticity	9.54E-03			CNR1	1
Cell-To-Cell Signaling and Interaction, Nervous System Development and Function	neurotransmission of serotonergic neurons	9.54E-03			CACNA1B	1
Nervous System Development and Function, Neurological Disease, Ophthalmic Disease	optic nerve cupping	9.54E-03			SLC1A3	1
Cellular Assembly and Organization	quantity of peripheral heterochromatin	9.54E-03			LMNA	1
Molecular Transport, Small Molecule Biochemistry	release of lactic acid	9.54E-03			SLC1A3	1
Cell Cycle	replication of Toxoplasma gondii ME49	9.54E-03			GBP2	1
Cell Morphology, Cellular Assembly and Organization	shape of nucleus	9.54E-03			LMNA	1
Cell-To-Cell Signaling and Interaction	signaling of postsynaptic neurons	9.54E-03			GRM5	1
Endocrine System Development and Function, Organ Morphology, Organismal Development, Reproductive System Development and Function, Tissue Morphology	size of pituitary tissue	9.54E-03			SLC6A3	1
Amino Acid Metabolism, Lipid Metabolism, Small Molecule Biochemistry	suppression of GABA	9.54E-03			CNR1	1
Nervous System Development and Function	synaptic plasticity of hippocampal neurons	9.54E-03			CNR1	1
Infectious Diseases	toxoplasmosis	9.54E-03			GBP2	1
Psychological Disorders	Mood Disorders	1.03E-02			ANXA6,COQ7,HMGCS2,PDYN,TTR	5
Neurological Disease	damage of central nervous system	1.03E-02		-1.091	CNR1,GPX3,SLC1A2,SLC1A3,TF	5
Lipid Metabolism, Molecular Transport, Small Molecule Biochemistry	concentration of acylglycerol	1.12E-02			DAGLA,PIK3R1	2
Lipid Metabolism, Molecular Transport, Small Molecule Biochemistry	release of fatty acid	1.12E-02			CNR1,SERPINC1	2
Cell Death and Survival	cell death of striatal neurons	1.13E-02			GRM3,GRM5,SLC6A3	3
Amino Acid Metabolism, Molecular Transport, Small Molecule Biochemistry	concentration of L-glutamic acid	1.25E-02			SLC1A2,SLC1A3	2
Cellular Compromise, Neurological Disease, Organismal Injury and Abnormalities	damage of cerebral cortex cells	1.53E-02			CNR1,SLC1A2	2
Neurological Disease, Psychological Disorders	disorder of basal ganglia	1.57E-02			ADCY5,CNR1,GNAL,MYO1B,PRKCG,RAB6A,SERPINA3,SLC1A3,TH	9
Cell-To-Cell Signaling and Interaction, Molecular Transport, Small Molecule Biochemistry	release of neurotransmitter	1.70E-02			CNR1,SLC6A3,TH	3
Neurological Disease, Skeletal and Muscular Disorders	neuromuscular disease	1.71E-02			ADCY5,CNR1,GNAL,MYO1B,PRKCG,RAB6A,SERPINA3,SLC1A3,TH	9
Free Radical Scavenging	production of superoxide	1.84E-02			DBI,PDYN	2
Nervous System Development and Function	activation of neuronal layer	1.90E-02			CNR1	1
Cellular Assembly and Organization, Nervous System Development and Function	assembly of axon initial segments	1.90E-02			SPTAN1	1
Amino Acid Metabolism, Small Molecule Biochemistry	clearance of L-glutamic acid	1.90E-02			SLC1A2	1
Cell-To-Cell Signaling and Interaction, Drug Metabolism, Molecular Transport, Small Molecule Biochemistry	clearance of dopamine	1.90E-02			SLC6A3	1
Neurological Disease, Psychological Disorders	corticobasal degeneration	1.90E-02			SERPINA3	1
Cell Cycle	entry into G2/M phase	1.90E-02			LMNA	1
Neurological Disease, Psychological Disorders	first-onset paranoid schizophrenia	1.90E-02			TTR	1
Hereditary Disorder, Neurological Disease, Organismal Injury and Abnormalities, Psychological Disorders	frontotemporal dementia with parkinsonism	1.90E-02			SERPINA3	1
Cell-To-Cell Signaling and Interaction	fusion of endothelial cells	1.90E-02			LGALS1	1
Cell-To-Cell Signaling and Interaction, Nervous System Development and Function	long term depression of mossy fiber synapse	1.90E-02			GRM5	1
Cell-To-Cell Signaling and Interaction, Nervous System Development and Function	long term depression of striatopallidal neurons	1.90E-02			ADCY5	1
Cell-To-Cell Signaling and Interaction, Nervous System Development and Function	long-term potentiation of corticostriatal neurons	1.90E-02			GRM5	1
Lipid Metabolism, Molecular Transport, Small Molecule Biochemistry, Vitamin and Mineral Metabolism	quantity of vitamin E	1.90E-02			NQO1	1
Endocrine System Development and Function, Lipid Metabolism, Molecular Transport, Small Molecule Biochemistry	release of corticosterone	1.90E-02			CNR1	1
Drug Metabolism, Lipid Metabolism, Molecular Transport, Small Molecule Biochemistry	release of epoprostenol	1.90E-02			SERPINC1	1
Cellular Function and Maintenance	respiration of neurons	1.90E-02			SLC25A12	1
Cardiovascular System Development and Function, Tissue Morphology	stimulation of endothelial tissue	1.90E-02			SERPINC1	1
Amino Acid Metabolism, Drug Metabolism, Small Molecule Biochemistry	synthesis of L-dopa	1.90E-02			TH	1
Cell-To-Cell Signaling and Interaction, Drug Metabolism, Small Molecule Biochemistry	synthesis of dopamine	1.90E-02			TH	1
Neurological Disease, Organismal Injury and Abnormalities, Psychological Disorders	traumatic brain injury	1.95E-02			CNR1,GPX3,SLC1A2	3
Carbohydrate Metabolism, Lipid Metabolism, Small Molecule Biochemistry	hydrolysis of phosphatidylinositol	2.00E-02			GRM2,GRM5	2
Hereditary Disorder, Neurological Disease	purkinje cell degeneration	2.00E-02			NT5DC3,PRKCG	2
Cellular Growth and Proliferation, Nervous System Development and Function	inhibition of neurons	2.17E-02			CNR1,GRM3	2
Cell Morphology, Cellular Assembly and Organization, Cellular Development, Cellular Function and Maintenance, Embryonic Development, Nervous System Development and Function, Tissue Development, Tissue Morphology	morphology of dendritic spines	2.17E-02			CNR1,LRRC7	2
Cell Death and Survival, Cellular Compromise, Neurological Disease, Tissue Morphology	neurodegeneration of dopaminergic neurons	2.17E-02			CNR1,PDYN	2
Nervous System Development and Function	neuroprotection	2.22E-02			CNR1,GRM2,PVALB	3
Cell-To-Cell Signaling and Interaction, Nervous System Development and Function	synaptic transmission of nervous tissue	2.22E-02			GRM5,NQO1,SHANK3,VDAC1	4
Hereditary Disorder, Neurological Disease, Psychological Disorders, Skeletal and Muscular Disorders	Huntington disease grade 0 Huntington's disease	2.83E-02			CNR1	1
Infectious Diseases	advanced stage infection	2.83E-02			SLC1A2	1
Behavior	approach behavior	2.83E-02			TH	1
Cardiovascular System Development and Function, Cellular Movement	chemorepulsion of endothelial cells	2.83E-02			PLXND1	1
Cellular Compromise, Neurological Disease, Organismal Injury and Abnormalities	damage of CA1 neuron	2.83E-02			SLC1A2	1
Neurological Disease, Organismal Injury and Abnormalities	damage of white matter	2.83E-02			TF	1
Neurological Disease	delay in amyotrophic lateral sclerosis	2.83E-02			SLC1A2	1
Cell-To-Cell Signaling and Interaction, Nervous System Development and Function	desensitization of hippocampal neurons	2.83E-02			CNR1	1
Cell-To-Cell Signaling and Interaction, Cellular Growth and Proliferation, Nervous System Development and Function	excitation of CA1 neuron	2.83E-02			KCNIP2	1
Behavior	fear conditioning	2.83E-02			TH	1
Nutritional Disease, Psychological Disorders	hypophagia	2.83E-02			TH	1
Cell-To-Cell Signaling and Interaction, Nervous System Development and Function	long term depression of medium spiny neurons	2.83E-02			GRM5	1
Cell-To-Cell Signaling and Interaction, Nervous System Development and Function	long-term potentiation of mossy fiber synapse	2.83E-02			GRM5	1
Cellular Movement, Embryonic Development, Nervous System Development and Function	nucleokinesis of neuroblasts	2.83E-02			CNR1	1
Cell Morphology, Cellular Assembly and Organization	structural integrity of plasma membrane	2.83E-02			NDUFS1	1
Cell-To-Cell Signaling and Interaction, Cellular Growth and Proliferation, Nervous System Development and Function	suppression of neurons	2.83E-02			CNR1	1
Amino Acid Metabolism, Small Molecule Biochemistry	synthesis of L-glutamic acid	2.83E-02			GLS	1
Cardiovascular Disease, Neurological Disease, Organismal Injury and Abnormalities, Psychological Disorders	ischemic injury of brain	2.90E-02			CNR1,GPX3	2
Cell-To-Cell Signaling and Interaction, Molecular Transport, Small Molecule Biochemistry	concentration of 5-hydroxytryptamine	3.30E-02			CACNA1B,SLC6A3	2
Cell-To-Cell Signaling and Interaction, Drug Metabolism, Molecular Transport, Small Molecule Biochemistry	release of dopamine	3.30E-02			CNR1,SLC6A3	2
Cell Morphology, Cellular Function and Maintenance	transmembrane potential of mitochondria	3.30E-02			BID,NDUFS1	2
Neurological Disease, Organismal Injury and Abnormalities	damage of brain	3.48E-02		-1.698	CNR1,GPX3,SLC1A2,SLC1A3	4
Cell-To-Cell Signaling and Interaction, Nervous System Development and Function	synaptic transmission of hippocampal cells	3.50E-02			GRM5,SHANK3	2
Cell Death and Survival	cell death of brain	3.53E-02		-0.533	BID,GRM3,GRM5,SERPINA3,SLC1A2,SLC6A3,TF	7
Behavior	conditioning	3.71E-02			PDYN,TH	2
Cellular Assembly and Organization	clustering of mitochondria	3.76E-02			BID	1
Cell-To-Cell Signaling and Interaction, Nervous System Development and Function	depotentiation of synapse	3.76E-02			GRM5	1
Nervous System Development and Function	development of pyramidal tract	3.76E-02			CNR1	1
Hereditary Disorder, Neurological Disease, Psychological Disorders, Skeletal and Muscular Disorders	grade 1 Huntington's disease	3.76E-02			CNR1	1
Hereditary Disorder, Neurological Disease, Psychological Disorders, Skeletal and Muscular Disorders	grade 2 Huntington's disease	3.76E-02			CNR1	1
Cellular Movement	haptotaxis of cells	3.76E-02			PRKCG	1
Infectious Diseases, Neurological Disease	infection of brain	3.76E-02			GBP2	1
Behavior	place aversion	3.76E-02			PDYN	1
Cell Morphology, Cellular Assembly and Organization, Cellular Function and Maintenance	reorganization of actin filaments	3.76E-02			SERPINC1	1
Cell-To-Cell Signaling and Interaction, Molecular Transport, Small Molecule Biochemistry	uptake of 5-hydroxytryptamine	3.76E-02			SLC6A3	1
Cellular Development, Connective Tissue Development and Function, Tissue Development	differentiation of adipoblasts	4.60E-02			LMNA,PIK3R1	2
Neurological Disease	degeneration of optic nerve	4.68E-02			SLC1A3	1
Cell-To-Cell Signaling and Interaction, Drug Metabolism, Molecular Transport, Small Molecule Biochemistry	efflux of dopamine	4.68E-02			SLC6A3	1
Cell-To-Cell Signaling and Interaction, Cellular Growth and Proliferation, Nervous System Development and Function	excitation of hippocampal neurons	4.68E-02			KCNIP2	1
Cellular Assembly and Organization	formation of cytoplasmic aggregates	4.68E-02			SLC6A3	1
Endocrine System Development and Function, Organ Development	function of pituitary gland	4.68E-02			SLC6A3	1
Cellular Growth and Proliferation, Nervous System Development and Function, Tissue Development	generation of neuronal progenitor cells	4.68E-02			CNR1	1
Cellular Compromise, Neurological Disease, Organismal Injury and Abnormalities, Psychological Disorders	injury of cortical neurons	4.68E-02			CNR1	1
Cell Death and Survival, Nervous System Development and Function, Tissue Morphology	loss of hippocampal neurons	4.68E-02			SLC1A2	1
Neurological Disease	mechanical hypersensitivity	4.68E-02			GRM5	1
Cell Morphology, Cellular Compromise, DNA Replication, Recombination, and Repair	mutagenesis of cells	4.68E-02			NQO1	1
Neurological Disease, Ophthalmic Disease, Organismal Injury and Abnormalities, Psychological Disorders	progressive supranuclear palsy	4.68E-02			SERPINA3	1
Nervous System Development and Function	protection of motor neurons	4.68E-02			PVALB	1
Cell-To-Cell Signaling and Interaction, Nervous System Development and Function	response of synapse	4.68E-02			SHANK3	1
