# Supplementary material for: Label-Free Proteomic Analysis of Protein Changes in the Striatum during Chronic Ethanol Use and Early Withdrawal
Source: Front Behav Neurosci. 2016 Mar 11;10:46. doi: 10.3389/fnbeh.2016.00046 (PMC4786553; doi:10.3389/fnbeh.2016.00046)
Supplement: Supplementary file 6 [file DataSheet4.XLS]

## Sheet: CPu-WvC
© 2000-2015 QIAGEN. All rights reserved.
Symbol	Entrez Gene Name	GenPept/UniProt/Swiss-Prot Accession	Exp Fold Change	Exp p-value	Exp False Discovery Rate (q-value)	Networks	Location	Type(s)	Biomarker Application(s)	Drug(s)	Entrez Gene ID for Human	Entrez Gene ID for Mouse	Entrez Gene ID for Rat
ACTA1	actin, alpha 1, skeletal muscle	--				2	Cytoplasm	other			58	11459	29437
ACTG1	actin gamma 1	P63261	1.000	1.00E00	1.00E00	6	Cytoplasm	other	unspecified application		71	11465	287876
ADCYAP1	adenylate cyclase activating polypeptide 1 (pituitary)	--				2	Extracellular Space	other			116	11516	24166
ADD2	adducin 2 (beta)	Q9QYB8	-1.301	1.11E-14	9.53E-13	7	Cytoplasm	other			119	11519	24171
ADRBK1	adrenergic, beta, receptor kinase 1	Q99MK8	-1.513	1.44E-05	3.17E-04	6	Cytoplasm	kinase			156	110355	25238
AES	amino-terminal enhancer of split	Q08117	1.871	2.03E-08	7.96E-07	2	Nucleus	transcription regulator			166	14797	29466
AFTPH	aftiphilin	Q80WT5-2	-1.473	3.10E-05	6.16E-04		Cytoplasm	other			54812	216549	305544
AGRN	agrin	A2ASQ1-3	-1.067	3.90E-01	6.52E-01	8	Plasma Membrane	other			375790	11603	25592
AHCYL2	adenosylhomocysteinase-like 2	Q68FL4	-1.667	2.93E-06	7.69E-05		Other	enzyme			23382	74340	312192
AHI1	Abelson helper integration site 1	Q8K3E5	-2.652	2.32E-08	8.82E-07	6	Cytoplasm	other	unspecified application		54806	52906	308923
AK5	adenylate kinase 5	Q920P5	-1.295	5.71E-06	1.40E-04		Cytoplasm	kinase			26289	229949	365985
AKT1	v-akt murine thymoma viral oncogene homolog 1	P31750	-1.108	4.59E-01	7.08E-01	1,4,6	Cytoplasm	kinase	diagnosis,efficacy,response to therapy	MK2206, GSK2141795, ipatasertib, LY2780301, ARQ 092, AZD5363, BAY1125976, MPT0E028, archexin, enzastaurin, perifosine	207	11651	24185
ANK3	ankyrin 3, node of Ranvier (ankyrin G)	G5E8K5-2	-1.264	4.34E-05	8.31E-04	6	Plasma Membrane	other			288	11735	361833
AOC3	amine oxidase, copper containing 3	--				6	Plasma Membrane	enzyme		hydralazine, hydralazine/hydrochlorothiazide/reserpine, hydralazine/hydrochlorothiazide, hydralazine/isosorbide dinitrate	8639	11754	29473
AP3D1	adaptor-related protein complex 3, delta 1 subunit	O54774	-1.358	3.10E-06	8.04E-05	8	Cytoplasm	transporter			8943	11776	314633
APC	adenomatous polyposis coli	Q61315-4	-1.530	4.33E-05	8.30E-04	8	Nucleus	enzyme	diagnosis,disease progression,efficacy,prognosis,safety		324	11789	24205
APOE	apolipoprotein E	P08226	1.599	3.03E-07	9.40E-06	5	Extracellular Space	transporter	diagnosis,efficacy,prognosis,unspecified application		348	11816	25728
APOO	apolipoprotein O	Q9DCZ4	2.035	6.23E-17	7.37E-15		Extracellular Space	other			79135	68316	363474
APP	amyloid beta (A4) precursor protein	P12023-2	-1.007	9.27E-01	9.78E-01	2,9	Plasma Membrane	other	diagnosis,efficacy,unspecified application	bapineuzumab, florbetapir F18, florbetaben F	351	11820	54226
arachidonic acid	--	--				5	Other	chemical - endogenous mammalian	efficacy
ARC	activity-regulated cytoskeleton-associated protein	--				1	Cytoplasm	other			23237	11838	54323
ARFGEF3	ARFGEF family member 3	Q3UGY8	-1.264	2.74E-07	8.55E-06	1	Other	other			57221	215821
ARHGAP35	Rho GTPase activating protein 35	Q91YM2	-1.272	7.43E-170	5.40E-167	4	Nucleus	transcription regulator			2909	232906	306400
ARHGDIB	Rho GDP dissociation inhibitor (GDI) beta	Q61599	1.335	1.60E-08	6.47E-07	5	Cytoplasm	enzyme	diagnosis		397	11857	362456
ARHGEF9	Cdc42 guanine nucleotide exchange factor (GEF) 9	Q3UTH8-2	-1.499	3.87E-05	7.47E-04		Cytoplasm	other			23229	236915	66013
ARPC5L	actin related protein 2/3 complex, subunit 5-like	Q9D898	1.710	4.40E-07	1.31E-05		Cytoplasm	other			81873	74192	296710
ATF2	activating transcription factor 2	P16951-2	-2.807	3.10E-09	1.44E-07	7	Nucleus	transcription regulator	prognosis		1386	11909	81647
ATM	ATM serine/threonine kinase	--				8	Nucleus	kinase	diagnosis		472	11920	300711
ATN1	atrophin 1	--				3	Nucleus	transcription regulator			1822	13498	100911672|29515
ATP1A1	ATPase, Na+/K+ transporting, alpha 1 polypeptide	Q8VDN2	-1.066	4.09E-01	6.69E-01	7	Plasma Membrane	transporter		digoxin, trichloromethiazide, ciclopirox olamine, ethacrynic acid, reserpine/trichloromethiazide, bretylium, perphenazine, ouabain, digitoxin	476	11928	24211
ATP5B	ATP synthase, H+ transporting, mitochondrial F1 complex, beta polypeptide	P56480	1.272	5.11E-02	2.13E-01	3,6	Cytoplasm	transporter			506	11947	171374
ATP5H	ATP synthase, H+ transporting, mitochondrial Fo complex, subunit d	Q9DCX2	1.664	8.29E-06	1.94E-04	2	Cytoplasm	enzyme			10476	71679	641434
ATP7A	ATPase, Cu++ transporting, alpha polypeptide	--					Plasma Membrane	transporter			538	11977	24941
ATXN7L3B	ataxin 7-like 3B	Q3UD01	1.843	1.23E-11	8.05E-10		Other	other			552889	382423	100192313
AXIN1	axin 1	--				8	Cytoplasm	other			8312	12005	79257
AXIN2	axin 2	--				8	Cytoplasm	other			8313	12006	29134
BAD	BCL2-associated agonist of cell death	Q61337	1.317	4.62E-01	7.09E-01	4	Cytoplasm	other	efficacy		572	12015	64639
BAIAP3	BAI1-associated protein 3	Q80TT2	-4.829	3.15E-08	1.16E-06		Extracellular Space	other			8938	545192
BAX	BCL2-associated X protein	Q07813	1.484	1.95E-01	4.74E-01	4	Cytoplasm	transporter	efficacy,prognosis,unspecified application		581	12028	24887
BCAN	brevican	Q61361	-1.350	4.51E-07	1.33E-05	6	Extracellular Space	other			63827	12032	25393
BCAR1	breast cancer anti-estrogen resistance 1	Q61140-2	-1.062	6.25E-01	8.19E-01	8	Plasma Membrane	enzyme	prognosis		9564	12927	25414
BCKDK	branched chain ketoacid dehydrogenase kinase	--				6	Cytoplasm	kinase			10295	12041	29603
BCL2L1	BCL2-like 1	Q64373-2	1.796	2.39E-05	4.88E-04	2,7	Cytoplasm	other	efficacy,prognosis		598	12048	24888
BDNF	brain-derived neurotrophic factor	--				3,9	Extracellular Space	growth factor	efficacy,response to therapy		627	12064	24225
BLOC1S6	biogenesis of lysosomal organelles complex-1, subunit 6, pallidin	--					Cytoplasm	other			26258	18457	317630
BMI1	BMI1 proto-oncogene, polycomb ring finger	--				8	Nucleus	transcription regulator	diagnosis,efficacy,prognosis		648
BRK1	BRICK1, SCAR/WAVE actin-nucleating complex subunit	Q91VR8	1.274	3.15E-05	6.23E-04	4	Cytoplasm	other			55845	101314	679934
BTRC	beta-transducin repeat containing E3 ubiquitin protein ligase	--				8	Cytoplasm	enzyme			8945	12234	361765
C1QA	complement component 1, q subcomponent, A chain	--					Extracellular Space	other			712	12259	298566
C1QB	complement component 1, q subcomponent, B chain	P14106	-1.283	1.70E-86	9.59E-84	6	Extracellular Space	other			713	12260	29687
C3AR1	complement component 3a receptor 1	--				6	Plasma Membrane	G-protein coupled receptor			719	12267	84007
C4orf32	chromosome 4 open reading frame 32	Q9CZL2	1.865	1.07E-25	2.26E-23		Other	other			132720	70617	691931
C5AR1	complement component 5a receptor 1	--				5	Plasma Membrane	G-protein coupled receptor			728	12273	113959
CACNA1D	calcium channel, voltage-dependent, L type, alpha 1D subunit	--					Plasma Membrane	ion channel		cinnarizine, MEM-1003, clevidipine butyrate, amlodipine/hydrochlorothiazide/valsartan, amlodipine/telmisartan, aliskiren/amlodipine, aliskiren/amlodipine/hydrochlorothiazide, amlodipine/valsartan, amlodipine/perindopril, amlodipine/benazepril, verapamil, mibefradil, bepridil, enalapril/felodipine, amlodipine/atorvastatin, nisoldipine, isradipine, felodipine, nimodipine, nitrendipine, amlodipine, …	776	12289	29716
CAMK2A	calcium/calmodulin-dependent protein kinase II alpha	P11798	1.174	1.08E-02	7.23E-02	3	Cytoplasm	kinase			815	12322	25400
CAMK2B	calcium/calmodulin-dependent protein kinase II beta	P28652	1.332	5.23E-04	6.79E-03	3	Cytoplasm	kinase			816	12323	24245
CANX	calnexin	P35564	-1.009	8.78E-01	9.57E-01	7	Cytoplasm	other			821	12330	29144
CAPRIN1	cell cycle associated protein 1	Q60865	-1.674	3.45E-05	6.69E-04	9	Plasma Membrane	other			4076	53872	362173
CASP3	caspase 3, apoptosis-related cysteine peptidase	P70677	-1.184	6.12E-01	8.09E-01	3	Cytoplasm	peptidase	diagnosis,disease progression,efficacy,unspecified application	caspase 3 inhibitor, emricasan	836	12367	25402
CASP9	caspase 9, apoptosis-related cysteine peptidase	--				1	Cytoplasm	peptidase	diagnosis,efficacy	caspase-9 inhibitor	842	12371	58918
CAV1	caveolin 1, caveolae protein, 22kDa	P49817	2.282	3.56E-09	1.60E-07	6	Plasma Membrane	transmembrane receptor	diagnosis		857	12389	25404
CCND1	cyclin D1	--				1,8	Nucleus	transcription regulator	diagnosis,efficacy,prognosis,response to therapy,unspecified application	arsenic trioxide/tretinoin, arsenic trioxide/daunorubicin/tretinoin, arsenic trioxide/gemtuzumab ozogamicin/tretinoin, arsenic trioxide/idarubicin/tretinoin, arsenic trioxide	595	12443	58919
CD9	CD9 molecule	P40240	-1.204	4.32E-01	6.89E-01	7	Plasma Membrane	other	efficacy		928	12527	24936
CD53	CD53 molecule	--				7	Plasma Membrane	other			963	12508	24251
CD81	CD81 molecule	P35762	1.407	2.02E-03	2.03E-02	7	Plasma Membrane	other			975	12520	25621
CD151	CD151 molecule (Raph blood group)	O35566	1.480	1.86E-03	1.91E-02	7	Plasma Membrane	other			977	12476	64315|100911730
CDC42	cell division cycle 42	Q90694	1.309	2.05E-03	2.05E-02	9	Cytoplasm	enzyme			998
CDK5	cyclin-dependent kinase 5	P49615	1.101	1.96E-01	4.75E-01		Nucleus	kinase		dinaciclib, alvocidib	1020	12568	140908
CDKN1A	cyclin-dependent kinase inhibitor 1A (p21, Cip1)	--				1	Nucleus	kinase	diagnosis,efficacy,prognosis,response to therapy		1026	12575	114851
CDKN1B	cyclin-dependent kinase inhibitor 1B (p27, Kip1)	P46414	1.206	5.73E-01	7.85E-01	7	Nucleus	kinase	diagnosis,disease progression,efficacy,prognosis,response to therapy		1027	12576	83571
ceramide	--	--				4	Other	chemical - endogenous mammalian
CHD5	chromodomain helicase DNA binding protein 5	A2A8L1	-1.922	1.79E-07	5.91E-06		Nucleus	enzyme			26038	269610	691589
CHEK2	checkpoint kinase 2	--				4,8	Nucleus	kinase			11200	50883	114212
cholesterol	--	--					Other	chemical - endogenous mammalian	diagnosis,efficacy,prognosis,safety
CHRNA7	cholinergic receptor, nicotinic, alpha 7 (neuronal)	--				2,5	Plasma Membrane	transmembrane receptor	prognosis	varenicline, ABT-089, isoflurane, mecamylamine, succinylcholine, rocuronium, doxacurium, amobarbital, mivacurium, pipecuronium, rapacuronium, metocurine, atracurium, cisatracurium, acetylcholine, nicotine, D-tubocurarine, arecoline, lobeline, enflurane, pancuronium, vecuronium	1139	11441	25302
CIT	citron rho-interacting serine/threonine kinase	P49025-3	-1.365	2.68E-06	7.11E-05	3	Cytoplasm	kinase			11113	12704	83620
CLNS1A	chloride channel, nucleotide-sensitive, 1A	Q61189	2.259	3.43E-05	6.69E-04	3	Plasma Membrane	ion channel			1207	12729	65160
CLTA	clathrin, light chain A	O08585	1.273	1.45E-01	4.02E-01	2	Plasma Membrane	other			1211	12757	83800
CNR1	cannabinoid receptor 1 (brain)	P47746	1.851	5.73E-02	2.27E-01	5,7	Plasma Membrane	G-protein coupled receptor		trans-(±)-nabilone, SLV 319, rimonabant, BAY 38-7271, delta-8-tetrahydrocannabinol, delta-9-tetrahydrocannabinol	1268	12801	25248
COPS8	COP9 signalosome subunit 8	Q8VBV7	1.655	2.32E-07	7.48E-06	7	Nucleus	other			10920	108679	363283
COPZ1	coatomer protein complex, subunit zeta 1	P61924	1.503	3.02E-08	1.12E-06		Cytoplasm	transporter			22818	56447	315345
COX6A1	cytochrome c oxidase subunit VIa polypeptide 1	P43024	2.387	7.27E-06	1.73E-04	3	Cytoplasm	enzyme			1337	12861	25282
COX6B1	cytochrome c oxidase subunit VIb polypeptide 1 (ubiquitous)	P56391	1.594	7.16E-19	9.84E-17		Cytoplasm	enzyme			1340	110323	688869
CPNE6	copine VI (neuronal)	Q9Z140	-1.755	2.38E-07	7.57E-06	2	Plasma Membrane	transporter			9362	12891	691478
CPSF1	cleavage and polyadenylation specific factor 1, 160kDa	Q9EPU4	-1.405	1.15E-05	2.60E-04		Nucleus	other			29894	94230	366952
CPSF7	cleavage and polyadenylation specific factor 7, 59kDa	Q8BTV2-2	-1.417	2.95E-05	5.92E-04		Nucleus	other			79869	269061	365407
CREB1	cAMP responsive element binding protein 1	P16220-3	-1.301	6.28E-01	8.20E-01	1	Nucleus	transcription regulator			1385	12912	81646
Crip2	cysteine rich protein 2	Q9DCT8	1.375	2.27E-09	1.08E-07	2	Plasma Membrane	other				68337	338401
CSK	c-src tyrosine kinase	P41241	1.210	5.08E-01	7.42E-01		Cytoplasm	kinase			1445	12988	315707
CSNK2A1	casein kinase 2, alpha 1 polypeptide	Q60737	-1.437	5.20E-05	9.68E-04	2	Nucleus	kinase			1457	12995	116549
CSNK2A2	casein kinase 2, alpha prime polypeptide	O54833	-1.413	1.39E-06	3.91E-05	2	Cytoplasm	kinase			1459	13000	307641
CTNNB1	catenin (cadherin-associated protein), beta 1, 88kDa	Q02248	-1.039	5.76E-01	7.87E-01	6,8	Nucleus	transcription regulator	diagnosis,disease progression,efficacy,prognosis	PRI-724	1499	12387	84353
CTSB	cathepsin B	P10605	1.302	1.73E-05	3.68E-04	1	Cytoplasm	peptidase			1508	13030	64529
CTTNBP2	cortactin binding protein 2	B9EJA2-5	1.258	1.82E-05	3.84E-04	3	Cytoplasm	other			83992	30785	282587
CUL9	cullin 9	Q80TT8	-1.667	1.66E-10	9.27E-09		Cytoplasm	other			23113	78309	316228
CXCR4	chemokine (C-X-C motif) receptor 4	--					Plasma Membrane	G-protein coupled receptor	diagnosis	cladribine/cytarabine/filgrastim/idarubicin/plerixafor, POL6326, BL-8040, plerixafor	7852	12767	60628
CYC1	cytochrome c-1	Q9D0M3-2	1.567	1.19E-11	7.83E-10	3	Cytoplasm	enzyme			1537	66445	300047
cyclic GMP	--	--				2	Other	chemical - endogenous mammalian	efficacy
CYCS	cytochrome c, somatic	P62898	1.108	5.66E-01	7.80E-01	4	Cytoplasm	transporter			54205	13063	25309|100363502
CYFIP1	cytoplasmic FMR1 interacting protein 1	Q7TMB8	-1.194	2.15E-02	1.20E-01	9	Cytoplasm	other			23191	20430	308666
DCLK1	doublecortin-like kinase 1	Q9JLM8	-1.570	3.86E-12	2.80E-10	5	Other	kinase			9201	13175
DCUN1D1	DCN1, defective in cullin neddylation 1, domain containing 1	Q9QZ73	1.891	1.14E-09	5.67E-08		Nucleus	other			54165	114893	100912352
DDAH1	dimethylarginine dimethylaminohydrolase 1	Q9CWS0	1.275	4.94E-05	9.26E-04	2	Cytoplasm	enzyme			23576	69219	64157
DDIT3	DNA-damage-inducible transcript 3	--				4	Nucleus	transcription regulator			1649	13198	29467
DDX3Y	DEAD (Asp-Glu-Ala-Asp) box helicase 3, Y-linked	Q62095	-1.504	3.91E-09	1.73E-07	8	Other	enzyme			8653	26900
DHPS	deoxyhypusine synthase	Q3TXU5	-3.042	1.37E-06	3.88E-05		Cytoplasm	enzyme	efficacy		1725	330817	288923
DIAPH1	diaphanous-related formin 1	O08808	-1.276	1.15E-01	3.51E-01	8	Plasma Membrane	other			1729	13367	307483
dihydroxyphenylethylene glycol	--	--					Other	chemical - endogenous mammalian
DKK3	dickkopf WNT signaling pathway inhibitor 3	Q9QUN9	1.348	5.50E-12	3.83E-10	3	Extracellular Space	cytokine			27122	50781	171548
DLG4	discs, large homolog 4 (Drosophila)	Q62108-3	-1.056	5.58E-01	7.73E-01	3,6	Plasma Membrane	kinase	unspecified application		1742	13385	29495
DLX2	distal-less homeobox 2	--					Nucleus	transcription regulator			1746	13392	296499
DMTN	dematin actin binding protein	Q9WV69-3	1.046	7.72E-01	9.09E-01	1	Plasma Membrane	other			2039	13829	361069
DNAJC6	DnaJ (Hsp40) homolog, subfamily C, member 6	Q80TZ3	-1.319	3.41E-07	1.04E-05	8	Cytoplasm	other			9829	72685	313409
DNM1L	dynamin 1-like	Q8K1M6	-1.126	2.54E-02	1.36E-01	2,6	Cytoplasm	enzyme			10059	74006	114114
dopamine	--	--				7	Other	chemical - endogenous mammalian
DRD2	dopamine receptor D2	--				3	Plasma Membrane	G-protein coupled receptor	response to therapy	paliperidone, risperidone, buspirone, carbidopa/entacapone/levodopa, bifeprunox, iloperidone, blonanserin, asenapine, pardoprunox, ocaperidone, abaperidone, methotrimeprazine, fluspirilene, SLV-314, cariprazine, rotigotine, acetophenazine, sultopride, zuclopenthixol, thioproperazine, lurasidone, opipramol, paliperidone palmitate, brexpiprazole, pipothiazine, carbidopa/levodopa, chloropromazine, d…	1813	13489	24318
DRD3	dopamine receptor D3	--				7	Plasma Membrane	G-protein coupled receptor	unspecified application	paliperidone, carbidopa/entacapone/levodopa, iloperidone, asenapine, abaperidone, PNU 170413, cariprazine, rotigotine, carbidopa/levodopa, domperidone, chlorprothixene, trifluoperazine, fluphenazine, pimozide, clozapine, haloperidol, fluoxetine/olanzapine, fluphenazine decanoate, thiothixene, amitriptyline/perphenazine, haloperidol decanoate, trimethobenzamide, fluphenazine enanthate, perphenazin…	1814	13490	29238
Dst	dystonin	Q91ZU6	1.231	5.27E-01	7.51E-01		Plasma Membrane	other				13518	316313
EEF2K	eukaryotic elongation factor 2 kinase	--				8	Cytoplasm	kinase			29904	13631	25435
EFTUD2	elongation factor Tu GTP binding domain containing 2	O08810	-1.346	1.09E-05	2.49E-04		Nucleus	enzyme			9343	20624	287739
EGF	epidermal growth factor	--				1	Extracellular Space	growth factor	diagnosis,efficacy,response to therapy,unspecified application		1950	13645	25313
EGR2	early growth response 2	--				5	Nucleus	transcription regulator			1959	13654	114090
EIF2AK4	eukaryotic translation initiation factor 2 alpha kinase 4	Q9QZ05	-2.087	1.56E-02	9.58E-02		Cytoplasm	kinase			440275	27103	114859
EIF2B4	eukaryotic translation initiation factor 2B, subunit 4 delta, 67kDa	Q61749	1.360	9.86E-07	2.84E-05	4	Cytoplasm	other			8890	13667	117019
EIF2B5	eukaryotic translation initiation factor 2B, subunit 5 epsilon, 82kDa	Q8CHW4	-1.794	2.30E-05	4.74E-04		Cytoplasm	translation regulator			8893	224045	192234
EIF3C	eukaryotic translation initiation factor 3, subunit C	Q8R1B4	-1.303	1.45E-05	3.17E-04		Other	translation regulator	unspecified application		8663	56347	293484
EIF4E	eukaryotic translation initiation factor 4E	P63073	1.070	3.31E-01	6.08E-01	8,9	Cytoplasm	translation regulator	prognosis		1977	13684	117045
EIF4G1	eukaryotic translation initiation factor 4 gamma, 1	Q6NZJ6	-1.337	1.72E-06	4.73E-05	8	Cytoplasm	translation regulator			1981	208643	287986
ENDOG	endonuclease G	O08600	2.890	1.31E-17	1.63E-15	4	Cytoplasm	enzyme			2021	13804	362100
ENO1	enolase 1, (alpha)	P17182	1.036	4.80E-01	7.22E-01	6	Cytoplasm	enzyme	diagnosis		2023	13806|433182	24333
ENPP6	ectonucleotide pyrophosphatase/phosphodiesterase 6	Q8BGN3	1.326	3.06E-06	7.99E-05		Cytoplasm	enzyme			133121	320981	306460
EOMES	eomesodermin	--				2	Nucleus	transcription regulator			8320	13813	316052
EPHB2	EPH receptor B2	--				1	Plasma Membrane	kinase	unspecified application		2048	13844	313633
EPS8	epidermal growth factor receptor pathway substrate 8	Q08509	-2.177	3.32E-09	1.51E-07	5	Plasma Membrane	peptidase			2059	13860	312812
ERBB4	erb-b2 receptor tyrosine kinase 4	--					Plasma Membrane	kinase	efficacy,safety	BMS-599626, afatinib, poziotinib	2066	13869	59323
ETFDH	electron-transferring-flavoprotein dehydrogenase	Q921G7	-1.481	4.90E-27	1.19E-24		Cytoplasm	enzyme			2110	66841	295143
ethanol	--	--				1,6,7	Other	chemical - endogenous mammalian
ETS2	v-ets avian erythroblastosis virus E26 oncogene homolog 2	--					Nucleus	transcription regulator	efficacy		2114	23872	304063
F2	coagulation factor II (thrombin)	--				9	Extracellular Space	peptidase	diagnosis,unspecified application	enoxaparin, desirudin, dabigatran etexilate, Fibrinogen, ximelagatran, thrombin inhibitor, antithrombin alfa, aspirin/dabigatran etexilate, dabigatran, aspirin/bivalirudin, argatroban, bivalirudin, lepirudin	2147	14061	29251
FARSB	phenylalanyl-tRNA synthetase, beta subunit	Q9WUA2	-1.353	2.32E-05	4.77E-04		Cytoplasm	enzyme			10056	23874	301544
FHL2	four and a half LIM domains 2	O70433	-4588652106.352	0.00E00	0.00E00	8	Nucleus	transcription regulator			2274	14200	63839
FOS	FBJ murine osteosarcoma viral oncogene homolog	--				2	Nucleus	transcription regulator	diagnosis,efficacy		2353	14281	314322
FOSB	FBJ murine osteosarcoma viral oncogene homolog B	--				1	Nucleus	transcription regulator			2354	14282	100360880
FOXA2	forkhead box A2	--					Nucleus	transcription regulator	disease progression		3170	15376	25099
FTL	ferritin, light polypeptide	P29391	-1.105	1.84E-01	4.59E-01		Cytoplasm	enzyme	diagnosis,unspecified application		2512	434624|14325	29292|100360087|100362384|499244|501644|100359668|500804|100363177
FYN	FYN proto-oncogene, Src family tyrosine kinase	P39688	1.602	1.93E-01	4.72E-01	2	Plasma Membrane	kinase	efficacy	dasatinib	2534	14360	25150
GAD1	glutamate decarboxylase 1 (brain, 67kDa)	P48318	-1.430	5.30E-11	3.21E-09	7	Cytoplasm	enzyme	unspecified application		2571	14415	24379
GALNS	galactosamine (N-acetyl)-6-sulfatase	Q571E4	-1.022	7.42E-01	8.91E-01		Cytoplasm	enzyme			2588	50917	292073
GAMT	guanidinoacetate N-methyltransferase	O35969	2.166	4.39E-09	1.92E-07		Cytoplasm	enzyme			2593	14431	25257
GDAP1	ganglioside induced differentiation associated protein 1	O88741	1.524	4.88E-14	4.07E-12		Cytoplasm	other			54332	14545	312890
GDNF	glial cell derived neurotrophic factor	--				5	Extracellular Space	growth factor			2668	14573	25453
GFAP	glial fibrillary acidic protein	P03995-2	1.418	7.13E-01	8.75E-01		Cytoplasm	other	diagnosis		2670	14580	24387
GLDN	gliomedin	--				6	Cytoplasm	other			342035	235379	315675
GLG1	golgi glycoprotein 1	Q61543	-1.577	2.33E-06	6.20E-05	4	Cytoplasm	other			2734	20340	29476
glutathione	--	--				3	Other	chemical - endogenous mammalian	diagnosis,efficacy
GNRH1	gonadotropin-releasing hormone 1 (luteinizing-releasing hormone)	--				2	Extracellular Space	other		GNRH1, flutamide/goserelin, anastrozole/goserelin, goserelin/tamoxifen, triptorelin, goserelin	2796	14714	25194
GPD2	glycerol-3-phosphate dehydrogenase 2 (mitochondrial)	Q64521	-1.349	2.47E-30	6.60E-28	1	Cytoplasm	enzyme			2820	14571	25062
GPI	glucose-6-phosphate isomerase	P06745	1.069	3.23E-01	6.04E-01	2	Extracellular Space	enzyme	unspecified application		2821	14751	292804
GPR37	G protein-coupled receptor 37 (endothelin receptor type B-like)	--				7	Plasma Membrane	G-protein coupled receptor			2861	14763	117549
GRIA1	glutamate receptor, ionotropic, AMPA 1	P23818	-1.193	3.87E-01	6.49E-01	3	Plasma Membrane	ion channel		talampanel, farampator, LY451395, tezampanel, perampanel, sevoflurane, isoflurane, desflurane, methoxyflurane, enflurane	2890	14799	50592
GRIN1	glutamate receptor, ionotropic, N-methyl D-aspartate 1	P35438	-1.006	9.85E-01	9.97E-01	2,3	Plasma Membrane	ion channel	unspecified application	dextromethorphan/morphine, neramexane, bicifadine, delucemine, nebostinel, besonprodil, UK-240455, dextromethorphan/quinidine, ketamine, felbamate, ifenprodil, memantine, orphenadrine, cycloserine, aspirin/caffeine/orphenadrine, N-(2-indanyl)glycinamide, dextromethorphan, acamprosate, brompheniramine/dextromethorphan/pseudoephedrine, chlorpheniramine/dextromethorphan/phenylephrine, carbinoxamine/…	2902	14810	24408
GRIN2A	glutamate receptor, ionotropic, N-methyl D-aspartate 2A	--				5,6	Plasma Membrane	ion channel	unspecified application	dextromethorphan/morphine, neramexane, bicifadine, delucemine, nebostinel, besonprodil, UK-240455, tenocyclidine, dextromethorphan/quinidine, donepezil/memantine, ketamine, felbamate, memantine, orphenadrine, cycloserine, N-(2-indanyl)glycinamide, dextromethorphan, brompheniramine/dextromethorphan/pseudoephedrine, chlorpheniramine/dextromethorphan/phenylephrine, carbinoxamine/dextromethorphan/pse…	2903	14811	24409
GRM1	glutamate receptor, metabotropic 1	P97772-2	-1.254	3.09E-01	5.92E-01	3,5	Plasma Membrane	G-protein coupled receptor	efficacy	fasoracetam	2911	14816	24414
GRM5	glutamate receptor, metabotropic 5	Q3UVX5	-1.064	6.90E-01	8.61E-01	5,7	Plasma Membrane	G-protein coupled receptor		fasoracetam, acamprosate	2915	108071	24418
GSTT2/GSTT2B	glutathione S-transferase theta 2 (gene/pseudogene)	Q61133	1.489	8.22E-08	2.85E-06		Cytoplasm	enzyme			2953|653689	14872	29487
GSX2	GS homeobox 2	--					Nucleus	transcription regulator			170825	14843	364140
GTP	--	--				9	Other	chemical - endogenous mammalian
GYG1	glycogenin 1	Q9R062	-3.816	4.20E-10	2.27E-08		Cytoplasm	enzyme			2992	27357	81675
GYS1	glycogen synthase 1 (muscle)	Q9Z1E4	-1.747	1.16E-06	3.30E-05		Cytoplasm	enzyme			2997	14936	690987
H2AFX	H2A histone family, member X	--				8	Nucleus	transcription regulator	efficacy		3014	15270	500987
HAPLN2	hyaluronan and proteoglycan link protein 2	Q9ESM3	-1.494	1.27E-01	3.71E-01	6	Extracellular Space	other			60484	73940	64057
HDAC3	histone deacetylase 3	O88895	-1.011	9.59E-01	9.88E-01	5	Nucleus	transcription regulator		tributyrin, belinostat, pyroxamide, mocetinostat, bortezomib/vorinostat, chidamide, 4SC-202, vorinostat, romidepsin	8841	15183	84578
HDAC4	histone deacetylase 4	Q6NZM9	-1.249	1.86E-02	1.08E-01	5,7	Nucleus	transcription regulator		tributyrin, belinostat, pyroxamide, romidepsin	9759	208727	363287
HDAC5	histone deacetylase 5	Q9Z2V6	-1.937	1.36E-07	4.62E-06	5	Nucleus	transcription regulator		tributyrin, belinostat, pyroxamide, romidepsin	10014	15184	84580
HDAC6	histone deacetylase 6	Q9Z2V5	-1.100	4.50E-01	7.02E-01		Nucleus	transcription regulator	efficacy	tributyrin, belinostat, pyroxamide, bortezomib/vorinostat, ricolinostat, vorinostat, romidepsin	10013	15185	100911205|84581
HDAC7	histone deacetylase 7	--					Nucleus	transcription regulator		tributyrin, belinostat, pyroxamide, romidepsin	51564	56233	84582
HDAC10	histone deacetylase 10	--				5	Nucleus	transcription regulator		tributyrin, belinostat, pyroxamide, chidamide, romidepsin	83933	170787	362981
HMGCR	3-hydroxy-3-methylglutaryl-CoA reductase	--				5	Cytoplasm	enzyme	efficacy	aspirin/pravastatin, ezetimibe/fluvastatin, atorvastatin/niacin, atorvastatin/ezetimibe, ezetimibe/rosuvastatin, simvastatin/sitagliptin, atorvastatin/choline fenofibrate, choline fenofibrate/simvastatin, fenofibrate/simvastatin, pitavastatin, statin, lovastatin/niacin, ezetimibe/simvastatin, amlodipine/atorvastatin, fluvastatin, cerivastatin, atorvastatin, pravastatin, simvastatin, lovastatin, m…	3156	15357	25675
HMMR	hyaluronan-mediated motility receptor (RHAMM)	--				5	Plasma Membrane	transmembrane receptor			3161	15366	25460
HOMER1	homer scaffolding protein 1	Q9Z2Y3	1.072	4.64E-01	7.11E-01	1,5	Plasma Membrane	other			9456	26556	29546
HOMER2	homer scaffolding protein 2	Q9QWW1-2	-35054557201.723	0.00E00	0.00E00	5	Plasma Membrane	other			9455	26557	29547
HOXA9	homeobox A9	--					Nucleus	transcription regulator	diagnosis		3205	15405	297099|100909740|100911710
HOXA10	homeobox A10	--					Nucleus	transcription regulator			3206	15395	100912608|100911668|100909714
HRAS	Harvey rat sarcoma viral oncogene homolog	Q61411	1.405	1.94E-02	1.11E-01	1	Plasma Membrane	enzyme	prognosis,safety		3265	15461	293621
HSPA8	heat shock 70kDa protein 8	P63017	1.002	9.78E-01	9.96E-01	6	Cytoplasm	enzyme	diagnosis		3312	15481	24468
HSPD1	heat shock 60kDa protein 1 (chaperonin)	P63038	-1.078	3.34E-01	6.11E-01	4	Cytoplasm	enzyme	diagnosis,prognosis		3329	15510	63868
HTT	huntingtin	P42858	-1.852	3.05E-02	1.56E-01	3	Cytoplasm	transcription regulator	unspecified application		3064	15194	29424
ICAM1	intercellular adhesion molecule 1	--				9	Plasma Membrane	transmembrane receptor	diagnosis,efficacy,prognosis,unspecified application		3383	15894	25464
IGF1R	insulin-like growth factor 1 receptor	--				4	Plasma Membrane	transmembrane receptor	diagnosis,efficacy,prognosis	picropodophyllin, linsitinib, cixutumumab, ganitumab, AVE1642, BIIB022, IGF1, dalotuzumab, ceritinib, MM-141, IGF-methotrexate conjugate, PL225B, KW-2450	3480	16001	25718
Il3	interleukin 3	--					Extracellular Space	cytokine				16187	24495
IL18	interleukin 18	P70380	1.250	6.86E-01	8.59E-01	4	Extracellular Space	cytokine	efficacy,unspecified application		3606	16173	29197
IL6R	interleukin 6 receptor	--				5	Plasma Membrane	transmembrane receptor	efficacy	tocilizumab	3570	16194	24499
Ins1	insulin I	--				9	Extracellular Space	other				16333	24505
INSR	insulin receptor	--				4	Plasma Membrane	kinase	prognosis	insulin detemir, INS, canakinumab/INS, insulin aspart/insulin detemir, ceritinib, insulin glargine/insulin lispro, KW-2450, insulin aspart, insulin glulisine, insulin lispro, insulin glargine, protamine zinc insulin	3643	16337	24954
IPCEF1	interaction protein for cytohesin exchange factors 1	Q5DU31	-1.423	6.40E-06	1.54E-04	7	Cytoplasm	enzyme			26034	320495	361474
ITGB1	integrin, beta 1 (fibronectin receptor, beta polypeptide, antigen CD29 includes MDF2, MSK12)	P09055	-1.015	9.06E-01	9.69E-01	4	Plasma Membrane	transmembrane receptor	disease progression,prognosis		3688	16412	24511
ITIH1	inter-alpha-trypsin inhibitor heavy chain 1	Q61702	-1.067	8.61E-01	9.47E-01	12	Extracellular Space	other			3697	16424	306251
ITIH2	inter-alpha-trypsin inhibitor heavy chain 2	Q61703	-2.353	1.91E-08	7.55E-07	12	Extracellular Space	other			3698	16425
JUN	jun proto-oncogene	--				3	Nucleus	transcription regulator	prognosis		3725	16476	24516
KALRN	kalirin, RhoGEF kinase	A2CG49	-1.568	6.66E-09	2.82E-07	6	Cytoplasm	kinase			8997	545156	84009
KL	klotho	--					Extracellular Space	enzyme			9365	16591	83504
KLC1	kinesin light chain 1	O88447	-1.073	4.57E-01	7.07E-01	8	Cytoplasm	other			3831	16593	171041
KMT2D	lysine (K)-specific methyltransferase 2D	Q6PDK2	-1.019	9.37E-01	9.81E-01	11	Nucleus	transcription regulator			8085	381022	100362634
L-dopa	--	--				1	Other	chemical - endogenous mammalian
L-glutamic acid	--	--				4,5,6,7	Other	chemical - endogenous mammalian	efficacy,response to therapy
LAMTOR4	late endosomal/lysosomal adaptor, MAPK and MTOR activator 4	Q8CF66	1.436	8.30E-09	3.46E-07		Cytoplasm	other			389541	66096	360776
LDLR	low density lipoprotein receptor	--					Plasma Membrane	transporter	disease progression,unspecified application		3949	16835	300438
LHX5	LIM homeobox 5	--					Nucleus	transcription regulator			64211	16873	124451
LMNA	lamin A/C	P48678-2	-1.307	3.88E-05	7.47E-04	1	Nucleus	other			4000	16905	60374
LMO4	LIM domain only 4	--					Nucleus	transcription regulator			8543	16911	362051
LPAR1	lysophosphatidic acid receptor 1	--					Plasma Membrane	G-protein coupled receptor			1902	14745	116744
LRP1	low density lipoprotein receptor-related protein 1	Q91ZX7	-1.212	3.09E-03	2.80E-02	4	Plasma Membrane	transmembrane receptor		paclitaxel-angiopep-2 conjugate	4035	16971	299858
LTN1	listerin E3 ubiquitin protein ligase 1	Q6A009	-1.321	7.67E-10	3.98E-08		Nucleus	enzyme			26046	78913	288308
MAG	myelin associated glycoprotein	P20917-2	1.342	2.18E-03	2.13E-02	4	Plasma Membrane	other			4099	17136	29409
magnesium	--	--					Other	chemical - endogenous mammalian	efficacy,safety
manganese	--	--					Other	chemical - endogenous mammalian
MAP2	microtubule-associated protein 2	P20357	-1.500	2.52E-85	1.28E-82	5	Plasma Membrane	other		estramustine	4133	17756	25595
MAP1B	microtubule-associated protein 1B	P14873	-1.335	9.33E-36	3.39E-33	8	Cytoplasm	other			4131	17755	29456
MAP1S	microtubule-associated protein 1S	Q8C052	-1.144	1.42E-02	8.92E-02	7	Cytoplasm	enzyme			55201	270058	290640
MAP2K4	mitogen-activated protein kinase kinase 4	P47809	-1.087	3.56E-01	6.26E-01	4,8	Cytoplasm	kinase			6416	26398	287398
MAPK1	mitogen-activated protein kinase 1	P63085	1.016	8.79E-01	9.57E-01	5	Cytoplasm	kinase	efficacy	MAP kinase1 inhibitor, binimetinib, BVD-523, LY-3007113, pexmetinib	5594	26413	116590
MAPK8IP3	mitogen-activated protein kinase 8 interacting protein 3	Q9ESN9-2	-1.996	1.62E-18	2.11E-16	8	Cytoplasm	other			23162	30957	302983
MAPT	microtubule-associated protein tau	P10637	-1.068	5.97E-01	7.98E-01	2	Plasma Membrane	other	diagnosis,efficacy,unspecified application		4137	17762	29477
MATR3	matrin 3	Q8K310	-1.332	1.60E-05	3.46E-04	9	Nucleus	other			9782	17184	29150
MECP2	methyl CpG binding protein 2	--				2	Nucleus	transcription regulator	unspecified application		4204	17257	29386
MEF2C	myocyte enhancer factor 2C	--				2	Nucleus	transcription regulator	unspecified application		4208	17260	499497
Mff	mitochondrial fission factor	Q6PCP5	1.508	2.11E-25	4.14E-23	2	Cytoplasm	other				75734	301563
MICALL1	MICAL-like 1	Q8BGT6	4.020	8.06E-17	9.31E-15		Cytoplasm	other	unspecified application		85377	27008	362958
mir-124	microRNA 124-1	--					Cytoplasm	microRNA	unspecified application		406908|406907|406909	723951|723950|387233	100314291|100314024|100314155
MKNK1	MAP kinase interacting serine/threonine kinase 1	--				3,8	Cytoplasm	kinase			8569	17346	500526
MME	membrane metallo-endopeptidase	--				5	Plasma Membrane	peptidase	diagnosis,efficacy,unspecified application		4311	17380	24590
MOBP	myelin-associated oligodendrocyte basic protein	Q9D2P8	2.173	2.71E-05	5.46E-04	3	Cytoplasm	other			4336	17433	25037
MOG	myelin oligodendrocyte glycoprotein	Q61885	1.649	5.42E-05	9.94E-04	5	Extracellular Space	other			4340	17441	24558
MOGS	mannosyl-oligosaccharide glucosidase	Q80UM7	-1.342	2.44E-12	1.80E-10		Cytoplasm	enzyme			7841	57377	78947
MRPL16	mitochondrial ribosomal protein L16	Q99N93	1.510	1.31E-08	5.35E-07		Cytoplasm	other			54948	94063	293754
MRPL21	mitochondrial ribosomal protein L21	Q9D1N9	1.919	4.98E-12	3.52E-10		Cytoplasm	other			219927	353242	309140
MRPL24	mitochondrial ribosomal protein L24	Q9CQ06	1.420	2.24E-08	8.62E-07		Cytoplasm	other			79590	67707	295224
MRPL48	mitochondrial ribosomal protein L48	Q8JZS9	1.602	2.70E-06	7.11E-05	1	Cytoplasm	other			51642	52443	293149
MSN	moesin	P26041	1.070	3.40E-01	6.13E-01	4	Plasma Membrane	other			4478	17698	81521
MTCH1	mitochondrial carrier 1	Q791T5-2	1.668	1.01E-09	5.11E-08	8	Cytoplasm	other			23787	56462	294313
MTCH2	mitochondrial carrier 2	Q791V5	1.450	1.94E-13	1.56E-11		Cytoplasm	other			23788	56428	295922
MTDH	metadherin	Q80WJ7	-1.330	1.22E-01	3.63E-01	6	Cytoplasm	transcription regulator	prognosis		92140	67154	170910
MTOR	mechanistic target of rapamycin (serine/threonine kinase)	Q9JLN9	-1.224	3.07E-07	9.47E-06	4	Nucleus	kinase	efficacy	ridaforolimus, OSI-027, methotrexate/sirolimus/tacrolimus, dactolisib, AZD2014, apitolisib, PKI-179, everolimus/exemestane, lenalidomide/temsirolimus, cc-223, PF-05212384, imatinib/sirolimus, cyclophosphamide/sirolimus, P7170, cyclosporine A/sirolimus/tacrolimus, everolimus/pasireotide, mTOR inhibitor, PWT33597, PQR309, VS-5584, sirolimus, temsirolimus, tacrolimus, everolimus, pimecrolimus	2475	56717	56718
MYC	v-myc avian myelocytomatosis viral oncogene homolog	--				4	Nucleus	transcription regulator	diagnosis,efficacy,prognosis,response to therapy,unspecified application		4609	17869	24577
MYCBP2	MYC binding protein 2, E3 ubiquitin protein ligase	Q7TPH6-2	-1.332	3.94E-10	2.16E-08	4	Nucleus	enzyme			23077	105689	290447
MYO5A	myosin VA (heavy chain 12, myoxin)	Q9Y4I1-2	-1.228	3.46E-07	1.05E-05	13	Cytoplasm	enzyme			4644	17918	25017
NCAM1	neural cell adhesion molecule 1	P13595	-1.141	6.82E-02	2.52E-01	4	Plasma Membrane	other	efficacy,prognosis	BB-10901	4684	17967	24586
NCKAP1	NCK-associated protein 1	P28660	-1.206	5.81E-02	2.29E-01	9	Plasma Membrane	other			10787	50884	58823
NCL	nucleolin	P09405	-1.565	1.81E-33	5.41E-31	5	Nucleus	other			4691	17975	25135
NDUFA6	NADH dehydrogenase (ubiquinone) 1 alpha subcomplex, 6, 14kDa	Q9CQZ5	1.788	3.33E-05	6.52E-04		Cytoplasm	enzyme			4700	67130	315167
NDUFA13	NADH dehydrogenase (ubiquinone) 1 alpha subcomplex, 13	Q9ERS2	1.706	2.70E-08	1.02E-06		Cytoplasm	enzyme			51079	67184	100911483|314759
NDUFB6	NADH dehydrogenase (ubiquinone) 1 beta subcomplex, 6, 17kDa	Q3UIU2	2.061	1.20E-15	1.24E-13		Cytoplasm	enzyme			4712	230075	297990
NDUFB10	NADH dehydrogenase (ubiquinone) 1 beta subcomplex, 10, 22kDa	Q9DCS9	1.732	1.72E-05	3.68E-04		Cytoplasm	enzyme			4716	68342	681418
NDUFS3	NADH dehydrogenase (ubiquinone) Fe-S protein 3, 30kDa (NADH-coenzyme Q reductase)	Q9DCT2	1.471	2.30E-20	3.34E-18	3	Cytoplasm	enzyme			4722	68349	295923
Ndufs5	NADH dehydrogenase (ubiquinone) Fe-S protein 5	Q99LY9	1.413	3.11E-09	1.44E-07		Cytoplasm	other				595136	100363268|362588
NDUFS6	NADH dehydrogenase (ubiquinone) Fe-S protein 6, 13kDa (NADH-coenzyme Q reductase)	P52503	2.726	2.63E-05	5.34E-04	2	Cytoplasm	enzyme			4726	407785|623286	679739|100912599
NFASC	neurofascin	Q810U3	-1.255	4.32E-04	5.84E-03	6	Plasma Membrane	other			23114	269116	116690
NFKBIA	nuclear factor of kappa light polypeptide gene enhancer in B-cells inhibitor, alpha	--				1	Cytoplasm	transcription regulator			4792	18035	25493
NFYB	nuclear transcription factor Y, beta	--					Nucleus	transcription regulator			4801	18045	25336
NGB	neuroglobin	Q9ER97	-4.607	4.09E-22	6.71E-20	2	Cytoplasm	transporter			58157	64242	85382
nitric oxide	--	--				2	Other	chemical - endogenous mammalian	diagnosis,efficacy
NKX2-3	NK2 homeobox 3	--				5	Nucleus	transcription regulator			159296	18089	309389
NLGN3	neuroligin 3	Q8BYM5	-1.539	2.31E-15	2.18E-13	7	Plasma Membrane	enzyme			54413	245537	171297
NONO	non-POU domain containing, octamer-binding	Q99K48	-1.170	3.08E-01	5.91E-01	9	Nucleus	other			4841	53610	317259
NR4A2	nuclear receptor subfamily 4, group A, member 2	--				3	Nucleus	ligand-dependent nuclear receptor			4929	18227	54278
NRCAM	neuronal cell adhesion molecule	Q810U4-2	-1.046	4.40E-01	6.92E-01		Plasma Membrane	other			4897	319504	497815
Nrg1	neuregulin 1	--					Plasma Membrane	other				211323
NTN1	netrin 1	--				8	Extracellular Space	other			9423	18208	114523
NTRK2	neurotrophic tyrosine kinase, receptor, type 2	P15209	-1.118	2.66E-02	1.41E-01	6	Plasma Membrane	kinase	diagnosis,disease progression,response to therapy	cabozantinib, cabozantinib/erlotinib, TSR-011, entrectinib, PLX7486, DS-6051b	4915	18212	25054
NTS	neurotensin	--				7	Extracellular Space	other			4922	67405	299757
NUP93	nucleoporin 93kDa	Q8BJ71	-1.322	8.33E-21	1.25E-18		Nucleus	other			9688	71805	291874
PABPC1	poly(A) binding protein, cytoplasmic 1	P29341	-1.116	4.70E-03	3.89E-02	9	Cytoplasm	translation regulator			26986	18458	171350
PARK2	parkin RBR E3 ubiquitin protein ligase	--					Cytoplasm	enzyme	diagnosis		5071	50873	56816
PAX3	paired box 3	--					Nucleus	transcription regulator			5077	18505	114502
PAX6	paired box 6	--				8	Nucleus	transcription regulator			5080	18508	25509
PCK2	phosphoenolpyruvate carboxykinase 2 (mitochondrial)	Q8BH04	-2.110	6.23E-09	2.68E-07		Cytoplasm	kinase			5106	74551	361042
PELP1	proline, glutamate and leucine rich protein 1	Q9DBD5	-1.593	1.01E-13	8.32E-12	14	Nucleus	other	response to therapy		27043	75273	360552
PHB2	prohibitin 2	O35129	1.520	4.58E-08	1.65E-06	6	Cytoplasm	transcription regulator			11331	12034	114766
PHOX2B	paired-like homeobox 2b	--					Nucleus	transcription regulator			8929	18935
PJA2	praja ring finger 2, E3 ubiquitin protein ligase	Q80U04-2	-3.573	2.19E-06	5.87E-05		Cytoplasm	enzyme			9867	224938	192256
PLAT	plasminogen activator, tissue	--				1	Extracellular Space	peptidase	diagnosis,efficacy,prognosis,safety,unspecified application	6-aminocaproic acid	5327	18791	25692
PLCB4	phospholipase C, beta 4	--				7	Cytoplasm	enzyme			5332	18798	25031
PLG	plasminogen	P20918	-1.735	1.71E-01	4.41E-01	4	Extracellular Space	peptidase	diagnosis	tenecteplase, PLAT, tranexamic acid, aprotinin, 6-aminocaproic acid, reteplase	5340	18815	85253
PLLP	plasmolipin	Q9DCU2	1.636	5.05E-08	1.80E-06		Plasma Membrane	transporter			51090	67801	64364
PLP1	proteolipid protein 1	P60202	1.633	1.90E-05	4.00E-04	4,6	Plasma Membrane	other			5354	18823	24943
PLXNA1	plexin A1	P70206	-1.429	7.81E-29	1.99E-26	5	Plasma Membrane	transmembrane receptor			5361	18844	362398
PLXNA2	plexin A2	P70207	-1.292	3.50E-17	4.24E-15	1	Plasma Membrane	transmembrane receptor			5362	18845	289392
PLXNA4	plexin A4	Q80UG2	-1.388	2.79E-08	1.04E-06	2	Plasma Membrane	transmembrane receptor			91584	243743	312213
POMC	proopiomelanocortin	--					Extracellular Space	other	diagnosis,efficacy,unspecified application		5443	18976	24664
PPARD	peroxisome proliferator-activated receptor delta	--					Nucleus	ligand-dependent nuclear receptor	diagnosis	treprostinil, icosapent, GW501516, bezafibrate	5467	19015	25682
PPFIA2	protein tyrosine phosphatase, receptor type, f polypeptide (PTPRF), interacting protein (liprin), alpha 2	Q8BSS9	-1.650	9.95E-13	7.67E-11		Plasma Membrane	phosphatase			8499	327814	362876
PPM1E	protein phosphatase, Mg2+/Mn2+ dependent, 1E	Q80TL0	-1.395	7.71E-13	6.03E-11	5	Nucleus	phosphatase			22843	320472	360593
PREPL	prolyl endopeptidase-like	Q8C167-2	-1.335	6.75E-15	6.14E-13		Other	peptidase			9581	213760	298771
PRKCA	protein kinase C, alpha	P20444	-1.315	4.12E-06	1.04E-04	7	Cytoplasm	kinase		L-threo-safingol, ingenol mebutate	5578	18750	24680
PRKCB	protein kinase C, beta	P68404-2	-1.468	5.45E-11	3.26E-09	7	Cytoplasm	kinase	diagnosis,efficacy,unspecified application	sotrastaurin, enzastaurin, ruboxistaurin, ingenol mebutate	5579	18751	25023
PRKCE	protein kinase C, epsilon	P16054	-1.153	2.11E-03	2.09E-02	4	Cytoplasm	kinase	disease progression	protein kinase C-epsilon activator, ingenol mebutate	5581	18754	29340
PRKCG	protein kinase C, gamma	P63318	-2.204	2.50E-23	4.38E-21	7	Cytoplasm	kinase		ingenol mebutate	5582	18752	24681
PRNP	prion protein	P04925	1.008	9.27E-01	9.78E-01		Plasma Membrane	other			5621	19122	24686
PRPF8	pre-mRNA processing factor 8	Q99PV0	-1.317	2.05E-06	5.58E-05		Nucleus	other			10594	192159	287530
PSEN1	presenilin 1	--				2,6	Plasma Membrane	peptidase	diagnosis,unspecified application	tarenflurbil	5663	19164	29192
PTBP1	polypyrimidine tract binding protein 1	P17225	-1.447	1.57E-06	4.33E-05	3	Nucleus	enzyme	unspecified application		5725	19205	29497
PTF1A	pancreas specific transcription factor, 1a	--				7	Nucleus	transcription regulator			256297	19213	117034
PTK2	protein tyrosine kinase 2	P34152-3	-1.368	7.25E-12	4.98E-10	8	Cytoplasm	kinase	diagnosis,disease progression,efficacy,prognosis		5747	14083	25614
PTPN5	protein tyrosine phosphatase, non-receptor type 5 (striatum-enriched)	P54830	1.306	5.05E-05	9.45E-04	2	Plasma Membrane	phosphatase			84867	19259	29644
PTPRZ1	protein tyrosine phosphatase, receptor-type, Z polypeptide 1	B9EKR1	-1.340	1.21E-08	4.99E-07	1	Plasma Membrane	phosphatase			5803	19283	25613
quinolinic acid	--	--					Other	chemical - endogenous mammalian
RABGAP1L	RAB GTPase activating protein 1-like	A6H6A9-3	-2.196	4.00E-49	1.70E-46		Cytoplasm	other			9910	29809	304914
RAC1	ras-related C3 botulinum toxin substrate 1 (rho family, small GTP binding protein Rac1)	P63001	1.358	1.50E-02	9.31E-02	2,9	Plasma Membrane	enzyme			5879	19353	363875
RANGAP1	Ran GTPase activating protein 1	P46061	-1.372	4.40E-16	4.76E-14	9	Nucleus	other			5905	19387	362965
RARA	retinoic acid receptor, alpha	--				9	Nucleus	ligand-dependent nuclear receptor	diagnosis	etretinate, daunorubicin/tretinoin, idarubicin/tretinoin, doxorubicin/tretinoin, adapalene, arsenic trioxide, isotretinoin, tazarotene, acitretin, tretinoin, tamibarotene, alitretinoin	5914	19401	24705
RASA3	RAS p21 protein activator 3	Q60790	-1.662	1.84E-12	1.38E-10	1	Plasma Membrane	ion channel			22821	19414	29372
RASGRF2	Ras protein-specific guanine nucleotide-releasing factor 2	P70392	-1.603	3.70E-09	1.65E-07	1	Cytoplasm	other			5924	19418	114513
RBP1	retinol binding protein 1, cellular	Q00915	1.788	1.63E-05	3.51E-04	4	Extracellular Space	transporter	diagnosis		5947	19659	25056
RELA	v-rel avian reticuloendotheliosis viral oncogene homolog A	Q04207-2	-1.077	6.88E-01	8.60E-01		Nucleus	transcription regulator	diagnosis,efficacy	NF-kappaB decoy	5970	19697	309165
RET	ret proto-oncogene	--					Plasma Membrane	kinase	efficacy,response to therapy	sunitinib, motesanib, cabozantinib, regorafenib, ponatinib, bortezomib/sorafenib, dexamethasone/lenalidomide/sorafenib, bevacizumab/sorafenib, imatinib/sirolimus, cabozantinib/erlotinib, imatinib/nilotinib/pegintron, cytarabine/idarubicin/sorafenib, 5-azacytidine/sorafenib, decitabine/sorafenib, MGCD516, imatinib, sorafenib, vandetanib	5979	19713	24716
RHOA	ras homolog family member A	Q9QUI0	1.188	6.69E-03	5.15E-02	9	Cytoplasm	enzyme			387	11848	117273
RHOG	ras homolog family member G	P84096	1.808	7.75E-24	1.41E-21	9	Cytoplasm	enzyme			391	56212	308875
RICTOR	RPTOR independent companion of MTOR, complex 2	Q6QI06	-1.576	3.06E-09	1.44E-07	7	Cytoplasm	other			253260	78757	310131
RIMS1	regulating synaptic membrane exocytosis 1	Q99NE5-6	-1.233	1.71E-02	1.02E-01	1	Plasma Membrane	other			22999	116837	84556
ROCK2	Rho-associated, coiled-coil containing protein kinase 2	P70336	-1.278	4.24E-06	1.07E-04	4	Cytoplasm	kinase			9475	19878	25537
ROR1	receptor tyrosine kinase-like orphan receptor 1	--					Plasma Membrane	kinase			4919	26563	362550
ROR2	receptor tyrosine kinase-like orphan receptor 2	--					Plasma Membrane	kinase			4920	26564	306782
RPL18	ribosomal protein L18	P35980	-2.856	9.20E-06	2.14E-04		Cytoplasm	other			6141	19899	81766
RPS6KB2	ribosomal protein S6 kinase, 70kDa, polypeptide 2	--					Cytoplasm	kinase			6199	58988	361696
RYR2	ryanodine receptor 2 (cardiac)	E9Q401	-1.448	3.95E-06	1.01E-04	6	Plasma Membrane	ion channel			6262	20191	689560
Scd2	stearoyl-Coenzyme A desaturase 2	P13011	-1.959	7.45E-06	1.76E-04	3	Cytoplasm	enzyme				20250	83792
SDHD	succinate dehydrogenase complex, subunit D, integral membrane protein	Q9CXV1	1.755	1.50E-16	1.69E-14		Cytoplasm	enzyme		hexachlorophene	6392	66925	363061
SEMA3A	sema domain, immunoglobulin domain (Ig), short basic domain, secreted, (semaphorin) 3A	--					Extracellular Space	other			10371	20346	29751
SEPT8	septin 8	Q8CHH9	1.439	5.21E-06	1.29E-04	4	Extracellular Space	other			23176	20362	303135
SERPINA3	serpin peptidase inhibitor, clade A (alpha-1 antiproteinase, antitrypsin), member 3	P07759	-1.739	2.02E-05	4.21E-04	5	Extracellular Space	other	unspecified application		12	16625|20717|20714|20716	24795
SFPQ	splicing factor proline/glutamine-rich	Q8VIJ6	-1.347	6.59E-06	1.57E-04	9	Nucleus	other			6421	71514	252855
SFXN1	sideroflexin 1	Q99JR1	1.371	1.48E-05	3.22E-04		Cytoplasm	transporter			94081	14057	364678
SFXN3	sideroflexin 3	Q91V61	1.420	8.94E-10	4.59E-08	1	Cytoplasm	transporter			81855	94280	65042
SHH	sonic hedgehog	--				10	Extracellular Space	peptidase	diagnosis,efficacy,response to therapy,unspecified application		6469	20423	29499
SIPA1L1	signal-induced proliferation-associated 1 like 1	Q8C0T5	-1.689	1.64E-15	1.60E-13	6	Cytoplasm	other			26037	217692	246212
SLC10A4	solute carrier family 10, member 4	Q3UEZ8	1.622	1.15E-09	5.67E-08	1	Plasma Membrane	transporter			201780	231290	305309
SLC17A7	solute carrier family 17 (vesicular glutamate transporter), member 7	Q3TXX4	-1.054	7.85E-01	9.12E-01		Plasma Membrane	transporter			57030	72961	116638
SLC18A2	solute carrier family 18 (vesicular monoamine transporter), member 2	Q8BRU6	1.605	1.16E-01	3.52E-01		Plasma Membrane	transporter		deserpidine/methyclothiazide, deserpidine, secologanin tryptamine alkaloid derivative, methamphetamine, amphetamine, tetrabenazine, reserpine/trichloromethiazide, chlorothiazide/reserpine, chlorthalidone/reserpine, hydralazine/hydrochlorothiazide/reserpine, hydroflumethiazide/reserpine, polythiazide/reserpine, hydrochlorothiazide/reserpine, N-methyl-3,4-methylenedioxyamphetamine, reserpine	6571	214084	25549
SLC1A2	solute carrier family 1 (glial high affinity glutamate transporter), member 2	P43006	1.372	3.75E-11	2.30E-09	6	Plasma Membrane	transporter		riluzole	6506	20511	29482
SLC25A3	solute carrier family 25 (mitochondrial carrier; phosphate carrier), member 3	Q8VEM8	1.603	2.07E-06	5.60E-05		Cytoplasm	transporter			5250	18674	245959
SLC25A11	solute carrier family 25 (mitochondrial carrier; oxoglutarate carrier), member 11	Q9CR62	1.797	1.42E-10	8.22E-09		Cytoplasm	transporter			8402	67863	64201
SLC25A12	solute carrier family 25 (aspartate/glutamate carrier), member 12	Q8BH59	1.337	5.20E-07	1.53E-05		Cytoplasm	transporter			8604	78830
SLC27A4	solute carrier family 27 (fatty acid transporter), member 4	Q91VE0	1.530	5.35E-05	9.87E-04		Plasma Membrane	transporter			10999	26569	311839
SLC4A10	solute carrier family 4, sodium bicarbonate transporter, member 10	Q5DTL9	-1.565	1.09E-33	3.46E-31		Plasma Membrane	transporter			57282	94229	295645
SLC6A3	solute carrier family 6 (neurotransmitter transporter), member 3	Q61327	1.474	4.51E-08	1.64E-06	7	Plasma Membrane	transporter		acetaminophen/clemastine/pseudoephedrine, acetaminophen/dexbrompheniramine/pseudoephedrine, dexbrompheniramine/pseudoephedrine, chlorpheniramine/ibuprofen/pseudoephedrine, cetirizine/pseudoephedrine, lisdexamfetamine, DOV-102,677, armodafinil, phentermine/topiramate, ioflupane I-123, hydrocodone/pseudoephedrine, bupropion/naltrexone, fexofenadine/pseudoephedrine, fenfluramine/phentermine, loratad…	6531	13162	24898
SLIT2	slit guidance ligand 2	--					Extracellular Space	other	diagnosis		9353	20563	360272
SMARCA2	SWI/SNF related, matrix associated, actin dependent regulator of chromatin, subfamily a, member 2	Q6DIC0	-1.308	4.00E-07	1.20E-05	2	Nucleus	transcription regulator			6595	67155	361745
SMARCAL1	SWI/SNF related, matrix associated, actin dependent regulator of chromatin, subfamily a-like 1	Q8BJL0	-1.545	1.51E-09	7.33E-08		Nucleus	enzyme			50485	54380	316477
SMC1A	structural maintenance of chromosomes 1A	Q9CU62	-1.720	5.32E-05	9.86E-04	8	Nucleus	transporter			8243	24061	63996
SNCB	synuclein, beta	Q91ZZ3	1.402	3.92E-01	6.53E-01		Cytoplasm	other			6620	104069	113893
SNX18	sorting nexin 18	Q91ZR2	-1.348	3.10E-05	6.16E-04	4	Cytoplasm	transporter			112574	170625	310097
SOD2	superoxide dismutase 2, mitochondrial	P09671	1.164	4.24E-01	6.82E-01		Cytoplasm	enzyme	diagnosis,unspecified application		6648	20656	24787
SOS1	son of sevenless homolog 1 (Drosophila)	Q62245	-1.042	7.37E-01	8.89E-01	5	Cytoplasm	other			6654	20662	313845
SP1	Sp1 transcription factor	--				3	Nucleus	transcription regulator			6667	20683	24790
SPTBN2	spectrin, beta, non-erythrocytic 2	O15020	-1.260	3.47E-11	2.15E-09	3	Cytoplasm	other			6712	20743	29211
SPTBN4	spectrin, beta, non-erythrocytic 4	--					Cytoplasm	other			57731	80297	308458
SRA1	steroid receptor RNA activator 1	Q80VJ2	1.306	1.19E-05	2.68E-04		Nucleus	transcription regulator			10011	24068	252891
STAM	signal transducing adaptor molecule (SH3 domain and ITAM motif) 1	P70297	1.085	5.10E-01	7.43E-01	15	Cytoplasm	other			8027	20844	498798
STAT3	signal transducer and activator of transcription 3 (acute-phase response factor)	P42227-2	-1.338	3.58E-03	3.12E-02	2	Nucleus	transcription regulator	diagnosis,efficacy,prognosis,response to therapy		6774	20848	25125
STRIP1	striatin interacting protein 1	Q8C079	-1.332	3.75E-06	9.65E-05		Nucleus	other			85369	229707	362012
STRN	striatin, calmodulin binding protein	O55106	1.035	6.62E-01	8.43E-01	3	Cytoplasm	other			6801	268980	29149
STRN4	striatin, calmodulin binding protein 4	P58404-2	-1.130	4.00E-01	6.61E-01	3	Cytoplasm	other			29888	97387	308392
sucrose	--	--				2,5	Other	chemical - endogenous mammalian
SUPT6H	suppressor of Ty 6 homolog (S. cerevisiae)	Q62383	-1.925	5.11E-26	1.13E-23		Nucleus	transcription regulator			6830	20926	303281
SYNCRIP	synaptotagmin binding, cytoplasmic RNA interacting protein	Q7TMK9-2	-1.390	2.34E-07	7.49E-06	9	Nucleus	other			10492	56403
SYNGAP1	synaptic Ras GTPase activating protein 1	F6SEU4	-1.361	2.66E-04	3.82E-03	6	Plasma Membrane	other			8831	240057	192117
SYNGR1	synaptogyrin 1	O55100-2	1.082	2.33E-02	1.27E-01	7	Plasma Membrane	transporter			9145	20972	29205
SYNGR3	synaptogyrin 3	Q8R191	1.037	8.27E-01	9.30E-01	7	Plasma Membrane	other			9143	20974	302975
TAC1	tachykinin, precursor 1	--				1	Extracellular Space	other	diagnosis		6863	21333	24806
TAOK2	TAO kinase 2	Q6ZQ29-2	-1.481	1.74E-08	6.97E-07		Cytoplasm	kinase			9344	381921
TERT	telomerase reverse transcriptase	--				1	Nucleus	enzyme	diagnosis,disease progression,prognosis	imetelstat, telomerase inhibitor	7015	21752	301965
testosterone	--	--				1	Other	chemical - endogenous mammalian	diagnosis,efficacy,prognosis,safety
TFAM	transcription factor A, mitochondrial	P40630-2	1.121	5.69E-01	7.82E-01	3	Cytoplasm	transcription regulator			7019	21780	83474
TFRC	transferrin receptor	Q62351	-1.740	5.99E-10	3.14E-08	5	Plasma Membrane	transporter	diagnosis,efficacy		7037	22042	64678
TH	tyrosine hydroxylase	P24529	1.309	8.45E-15	7.55E-13	7	Cytoplasm	enzyme		tyrosine hydroxylase inhibitor, 5,6,7,8-tetrahydrobiopterin	7054	21823	25085
TIMM8A	translocase of inner mitochondrial membrane 8 homolog A (yeast)	Q9WVA2	1.793	3.80E-06	9.73E-05	15	Cytoplasm	transporter			1678	30058	84383
TNC	tenascin C	Q80YX1-5	-1.131	1.89E-01	4.66E-01	8	Extracellular Space	other	diagnosis,response to therapy		3371	21923	116640
TNF	tumor necrosis factor	--				6	Extracellular Space	cytokine	diagnosis,disease progression,efficacy,prognosis,response to therapy,safety,unspecified application	adalimumab, etanercept, infliximab, certolizumab, golimumab, infliximab/methotrexate, dexamethasone/thalidomide, dexamethasone/pomalidomide, cyclophosphamide/dexamethasone/thalidomide, golimumab/methotrexate, bortezomib/dexamethasone/thalidomide, rituximab/thalidomide, bortezomib/thalidomide, prednisone/thalidomide, adalimumab/methotrexate, pomalidomide, thalidomide	7124	21926	24835
TNR	tenascin R	Q8BYI9	-1.341	1.30E-18	1.73E-16	6	Plasma Membrane	other			7143	21960	25567
TP53	tumor protein p53	--				3	Nucleus	transcription regulator	diagnosis,disease progression,efficacy,prognosis,response to therapy,unspecified application	CGM097, kevetrin	7157	22059	24842
TP53BP1	tumor protein p53 binding protein 1	P70399	-1.398	1.42E-15	1.45E-13	8	Nucleus	transcription regulator			7158	27223	296099
TPP2	tripeptidyl peptidase II	Q64514-2	-1.372	2.14E-16	2.37E-14		Cytoplasm	peptidase			7174	22019	81815
TRIM3	tripartite motif containing 3	Q9R1R2	-1.593	2.20E-08	8.56E-07	13	Cytoplasm	enzyme			10612	55992	83616
TRPV2	transient receptor potential cation channel, subfamily V, member 2	Q9WTR1	3.506	3.87E-07	1.16E-05	11	Plasma Membrane	ion channel			51393	22368	29465
TTC3	tetratricopeptide repeat domain 3	O88196-5	-1.710	6.13E-06	1.48E-04	8	Cytoplasm	enzyme			7267	22129	360702
TTLL4	tubulin tyrosine ligase-like family member 4	--				14	Other	enzyme			9654	67534	690512
TUBGCP2	tubulin, gamma complex associated protein 2	Q921G8	-1.351	8.59E-07	2.48E-05		Cytoplasm	peptidase			10844	74237	309098
UBA6	ubiquitin-like modifier activating enzyme 6	Q8C7R4	-1.075	5.59E-01	7.73E-01		Cytoplasm	enzyme			55236	231380	305268
UBE2O	ubiquitin-conjugating enzyme E2O	Q6ZPJ3	-1.276	8.06E-27	1.86E-24	4	Nucleus	enzyme			63893	217342	303689
UBE3A	ubiquitin protein ligase E3A	O08759	-1.468	5.68E-16	6.02E-14	3	Nucleus	enzyme			7337	22215	361585
UBE3C	ubiquitin protein ligase E3C	Q80U95	1.361	2.26E-05	4.67E-04	1	Nucleus	enzyme			9690	100763	362294
UBLCP1	ubiquitin-like domain containing CTD phosphatase 1	Q8BGR9	-1.688	4.51E-06	1.13E-04		Nucleus	phosphatase			134510	79560	360514
UNC13A	unc-13 homolog A (C. elegans)	Q4KUS2	-2.071	8.19E-11	4.79E-09	1	Plasma Membrane	other			23025	382018	64829
URGCP	upregulator of cell proliferation	Q5NCI0-2	-1.838	3.44E-06	8.87E-05		Cytoplasm	other			55665	72046	305493
USP24	ubiquitin specific peptidase 24	B1AY13	-1.283	2.31E-11	1.47E-09		Other	peptidase			23358	329908	313427
USP9X	ubiquitin specific peptidase 9, X-linked	P70398	-1.283	5.85E-22	9.30E-20	3	Plasma Membrane	peptidase	diagnosis		8239	22284	363445
VARS	valyl-tRNA synthetase	Q9Z1Q9	-1.444	6.43E-07	1.87E-05		Cytoplasm	enzyme			7407	22321	25009
VAV3	vav 3 guanine nucleotide exchange factor	Q9R0C8	-1.252	3.20E-05	6.31E-04	9	Extracellular Space	cytokine			10451	57257	295378
VDAC1	voltage-dependent anion channel 1	Q60932-2	1.574	1.29E-11	8.31E-10	1	Cytoplasm	ion channel			7416	22333	83529
VDAC2	voltage-dependent anion channel 2	Q60930	1.432	2.22E-07	7.21E-06	4	Cytoplasm	ion channel			7417	22334	83531
VIPAS39	VPS33B interacting protein, apical-basolateral polarity regulator, spe-39 homolog	Q8BGQ1-2	-1.268	1.25E-05	2.79E-04		Plasma Membrane	other			63894	104799	681989
VPS41	vacuolar protein sorting 41 homolog (S. cerevisiae)	Q5KU39	-2.179	6.07E-06	1.48E-04		Cytoplasm	transporter			27072	218035	306991
VPS13A	vacuolar protein sorting 13 homolog A (S. cerevisiae)	Q5H8C4-2	-1.385	4.55E-05	8.64E-04	1	Cytoplasm	transporter			23230	271564	309243
VRK1	vaccinia related kinase 1	--					Nucleus	kinase			7443	22367	362779
WDR7	WD repeat domain 7	Q920I9	-1.293	2.89E-05	5.80E-04	10	Cytoplasm	other			23335	104082	66031
WNT3A	wingless-type MMTV integration site family, member 3A	--				8	Extracellular Space	cytokine			89780	22416	303181
WNT7A	wingless-type MMTV integration site family, member 7A	--				8	Extracellular Space	cytokine			7476	22421	114850
ZFYVE27	zinc finger, FYVE domain containing 27	--				7	Plasma Membrane	other			118813	319740	309376
ZNF706	zinc finger protein 706	--				3	Other	other			51123	68036
