# Supplementary material for: Label-Free Proteomic Analysis of Protein Changes in the Striatum during Chronic Ethanol Use and Early Withdrawal
Source: Front Behav Neurosci. 2016 Mar 11;10:46. doi: 10.3389/fnbeh.2016.00046 (PMC4786553; doi:10.3389/fnbeh.2016.00046)
Supplement: Supplementary file 7 [file DataSheet5.XLS]

## Sheet: molecules
© 2000-2015 QIAGEN. All rights reserved.
Symbol	Entrez Gene Name	GenPept/UniProt/Swiss-Prot Accession	Exp Fold Change	Exp p-value	Exp False Discovery Rate (q-value)	Networks	Location	Type(s)	Biomarker Application(s)	Drug(s)	Entrez Gene ID for Human	Entrez Gene ID for Mouse	Entrez Gene ID for Rat
acetylcholine	--	--				4	Other	chemical - endogenous mammalian	efficacy
ACP1	acid phosphatase 1, soluble	Q561M1	1.421	5.22E-06	2.20E-04	2	Cytoplasm	phosphatase			52	11431	302513
ACVR2A	activin A receptor, type IIA	--				2	Plasma Membrane	kinase			92	11480	29263
ADCY3	adenylate cyclase 3	B8JK56	-1.683	7.44E-13	1.03E-10	2	Plasma Membrane	enzyme			109	104111	64508
ADD1	adducin 1 (alpha)	E9Q1K3	-5.359	1.58E-65	1.05E-62	3	Cytoplasm	other			118	11518	24170
ADGRB1	adhesion G protein-coupled receptor B1	Q3UHD1	-1.609	2.20E-05	7.98E-04	3	Plasma Membrane	G-protein coupled receptor			575	107831	362931
ADORA2A	adenosine A2a receptor	Q60613	1.308	4.64E-01	7.61E-01	6	Plasma Membrane	G-protein coupled receptor	unspecified application	adenosine, istradefylline, dyphylline, aspirin/butalbital/caffeine, acetaminophen/caffeine/dihydrocodeine, acetaminophen/aspirin/caffeine, caffeine/ergotamine, aspirin/caffeine/propoxyphene, aspirin/butalbital/caffeine/codeine, aspirin/caffeine/dihydrocodeine, binodenoson, regadenoson, preladenant, caffeine/ethanol, SCH-412348, acetaminophen/butalbital/caffeine, aminophylline, aspirin/caffeine/or…	135	11540	25369
AFP	alpha-fetoprotein	--				3	Extracellular Space	transporter	diagnosis,efficacy,safety,unspecified application		174	11576	24177
AKAP5	A kinase (PRKA) anchor protein 5	D3YVF0	-1.236	6.45E-02	3.23E-01		Plasma Membrane	other			9495	238276	171026
AKT1	v-akt murine thymoma viral oncogene homolog 1	P31750	-1.216	8.47E-02	3.74E-01	1	Cytoplasm	kinase	diagnosis,efficacy,response to therapy	MK2206, GSK2141795, ipatasertib, LY2780301, ARQ 092, AZD5363, BAY1125976, MPT0E028, archexin, enzastaurin, perifosine	207	11651	24185
ALCAM	activated leukocyte cell adhesion molecule	E9Q3Q6	-1.456	2.31E-05	8.16E-04	1	Plasma Membrane	other	prognosis		214	11658	79559
ALDH1A1	aldehyde dehydrogenase 1 family, member A1	P24549	1.977	1.53E-06	7.03E-05	4	Cytoplasm	enzyme	diagnosis,disease progression	disulfiram, chlorpropamide	216	11668	24188
ALDH3A2	aldehyde dehydrogenase 3 family, member A2	P47740	-1.362	4.38E-07	2.28E-05		Cytoplasm	enzyme			224	11671	65183
ANG	angiogenin, ribonuclease, RNase A family, 5	--				1	Extracellular Space	enzyme	response to therapy		283	11727	305843|497229
ANGPT1	angiopoietin 1	--				1	Extracellular Space	growth factor	disease progression,efficacy,prognosis	trebananib	284	11600	89807
AP2A2	adaptor-related protein complex 2, alpha 2 subunit	P17427	-1.172	1.37E-01	4.80E-01	4	Cytoplasm	transporter			161	11772	81637
APOB	apolipoprotein B	E9Q1Y3	-2.568	5.48E-07	2.76E-05	2	Extracellular Space	transporter	diagnosis,efficacy	mipomersen	338	238055	54225
APP	amyloid beta (A4) precursor protein	P12023-2	-1.054	6.65E-01	8.67E-01	1,2,3,4,5	Plasma Membrane	other	diagnosis,efficacy,unspecified application	bapineuzumab, florbetapir F18, florbetaben F	351	11820	54226
ARHGAP26	Rho GTPase activating protein 26	E9QAQ3	-1.605	9.33E-10	8.27E-08		Cytoplasm	other			23092	71302	307459
ATN1	atrophin 1	--				5	Nucleus	transcription regulator			1822	13498	100911672|29515
ATP	--	--				7	Other	chemical - endogenous mammalian
ATP8A1	ATPase, aminophospholipid transporter (APLT), class I, type 8A, member 1	P70704-3	-1.490	1.64E-17	4.05E-15	6	Cytoplasm	transporter			10396	11980	289615
ATXN2	ataxin 2	O70305-2	-1.251	8.29E-06	3.28E-04	3	Nucleus	other			6311	20239	288663
BAIAP2	BAI1-associated protein 2	Q8BKX1-3	-1.183	3.37E-01	6.74E-01	3	Plasma Membrane	kinase			10458	108100	117542
BAX	BCL2-associated X protein	Q07813	-1.233	6.95E-02	3.35E-01	1	Cytoplasm	transporter	efficacy,prognosis,unspecified application		581	12028	24887
BDNF	brain-derived neurotrophic factor	--				5	Extracellular Space	growth factor	efficacy,response to therapy		627	12064	24225
beta-estradiol	--	--				1,2	Other	chemical - endogenous mammalian	diagnosis,efficacy,safety
BMPR1A	bone morphogenetic protein receptor, type IA	Q60607	-1.648	2.03E-10	2.15E-08	1	Plasma Membrane	kinase	diagnosis,unspecified application		657	12166	81507
BUB3	BUB3 mitotic checkpoint protein	Q9WVA3	2.086	2.27E-07	1.33E-05	13	Nucleus	other			9184	12237	361662
BUB1B	BUB1 mitotic checkpoint serine/threonine kinase B	--				13	Nucleus	kinase			701	12236	171576
CASP3	caspase 3, apoptosis-related cysteine peptidase	P70677	-1.015	9.60E-01	9.87E-01	1	Cytoplasm	peptidase	diagnosis,disease progression,efficacy,unspecified application	caspase 3 inhibitor, emricasan	836	12367	25402
CASP4	caspase 4, apoptosis-related cysteine peptidase	--				4	Cytoplasm	peptidase			837	12363	114555
CASP7	caspase 7, apoptosis-related cysteine peptidase	--				14	Cytoplasm	peptidase			840	12369	64026
CBLN1	cerebellin 1 precursor	Q9R171	2.623	1.26E-06	5.98E-05	5	Cytoplasm	other	unspecified application		869	12404	498922
CD36	CD36 molecule (thrombospondin receptor)	--				4,5	Plasma Membrane	transmembrane receptor	efficacy		948	12491	29184
CDH2	cadherin 2, type 1, N-cadherin (neuronal)	P15116	-1.175	2.39E-01	6.06E-01	2	Plasma Membrane	other	diagnosis,prognosis	N-ac-CHAVC-NH2	1000	12558	83501
CDH11	cadherin 11, type 2, OB-cadherin (osteoblast)	P55288	-1.136	2.69E-01	6.38E-01	2,5	Plasma Membrane	other	efficacy,prognosis		1009	12552	84407
CENPE	centromere protein E, 312kDa	E9QKK1	30688328052.500	0.00E00	0.00E00	15	Nucleus	other			1062	229841	362044
CHCHD3	coiled-coil-helix-coiled-coil-helix domain containing 3	Q9CRB9	2.136	7.40E-09	5.77E-07		Cytoplasm	other			54927	66075	296966
choline	--	--				3	Other	chemical - endogenous mammalian	efficacy
CIDEA	cell death-inducing DFFA-like effector a	--				4	Cytoplasm	other	efficacy		1149	12683	291541
CLDN11	claudin 11	Q60771	2.394	1.15E-05	4.43E-04	5	Plasma Membrane	other			5010	18417	84588
CPLX1	complexin 1	P63040	1.236	3.83E-01	7.11E-01		Plasma Membrane	transporter			10815	12889	64832
CPLX2	complexin 2	P84086	-1.316	4.89E-02	2.80E-01	4,5	Cytoplasm	other			10814	12890	116657
CPLX3	complexin 3	Q8R1B5	2.899	3.96E-17	8.71E-15	5	Nucleus	transporter			594855	235415	501005
CREB1	cAMP responsive element binding protein 1	--				2	Nucleus	transcription regulator			1385	12912	81646
CSNK1D	casein kinase 1, delta	Q9DC28	1.849	7.03E-11	8.03E-09	5	Cytoplasm	kinase			1453	104318	64462
CTC1	CTS telomere maintenance complex component 1	Q5SUQ9-2	-1.387	2.44E-06	1.08E-04		Nucleus	other			80169	68964	303238
CTNNB1	catenin (cadherin-associated protein), beta 1, 88kDa	Q02248	-1.105	2.66E-01	6.36E-01	1	Nucleus	transcription regulator	diagnosis,disease progression,efficacy,prognosis	PRI-724	1499	12387	84353
CYFIP1	cytoplasmic FMR1 interacting protein 1	Q7TMB8	-1.085	6.03E-01	8.40E-01	5	Cytoplasm	other			23191	20430	308666
DIO3	deiodinase, iodothyronine, type III	--					Plasma Membrane	enzyme			1735	107585	29475
DLG4	discs, large homolog 4 (Drosophila)	Q62108-3	-1.195	5.06E-02	2.85E-01	3	Plasma Membrane	kinase	unspecified application		1742	13385	29495
DNMT1	DNA (cytosine-5-)-methyltransferase 1	J3QNW0	2.664	2.04E-05	7.44E-04	3	Nucleus	enzyme	diagnosis	5-azacytidine/decitabine, 5-azacytidine/cytarabine/decitabine, 5-azacytidine/sorafenib, decitabine/sorafenib, cladribine/cytarabine/decitabine, 5-azacytidine, decitabine	1786	13433	84350
DTNA	dystrobrevin, alpha	Q8CFR5	1.173	2.68E-07	1.55E-05		Plasma Membrane	other	unspecified application		1837	13527	307548
E2F1	E2F transcription factor 1	--				1	Nucleus	transcription regulator	disease progression,prognosis		1869	13555	399489
EBF1	early B-cell factor 1	--					Nucleus	transcription regulator			1879	13591	116543
EIF4E	eukaryotic translation initiation factor 4E	P63073	1.244	1.26E-01	4.59E-01	5	Cytoplasm	translation regulator	prognosis		1977	13684	117045
EIF4EBP1	eukaryotic translation initiation factor 4E binding protein 1	--				5	Cytoplasm	translation regulator	efficacy		1978	13685	116636
ELAVL1	ELAV like RNA binding protein 1	P70372	2.062	3.65E-06	1.57E-04	5	Cytoplasm	other	efficacy		1994	15568	363854
ELFN1	extracellular leucine-rich repeat and fibronectin type III domain containing 1	Q8C8T7	-3.385	1.09E-10	1.22E-08		Plasma Membrane	other			392617	243312	288512
EPN1	epsin 1	Q80VP1	-1.292	7.19E-02	3.43E-01	10	Plasma Membrane	other			29924	13854	117277
ERAP1	endoplasmic reticulum aminopeptidase 1	Q9EQH2	1.955	1.96E-05	7.19E-04	1	Extracellular Space	peptidase			51752	80898	80897
FABP4	fatty acid binding protein 4, adipocyte	--				4	Cytoplasm	transporter	disease progression		2167	11770	79451
FARS2	phenylalanyl-tRNA synthetase 2, mitochondrial	G3X9Q4	1.914	1.35E-05	5.11E-04		Cytoplasm	enzyme			10667	69955	306879
FGF2	fibroblast growth factor 2 (basic)	--				3,4,5	Extracellular Space	growth factor	diagnosis,efficacy,prognosis	pentosan polysulfate, suradista, sucralfate	2247	14173	54250
FKRP	fukutin related protein	--					Cytoplasm	other			79147	243853	308390
FN1	fibronectin 1	B7ZNJ1	1.043	7.00E-01	8.84E-01	5	Extracellular Space	enzyme	diagnosis,efficacy,prognosis,unspecified application	ocriplasmin, L19-IL2 monoclonal antibody-cytokine fusion protein	2335	14268	25661
FOS	FBJ murine osteosarcoma viral oncogene homolog	--				3	Nucleus	transcription regulator	diagnosis,efficacy		2353	14281	314322
G6PC3	glucose 6 phosphatase, catalytic, 3	Q6NSQ9	1.731	7.67E-06	3.10E-04		Cytoplasm	phosphatase			92579	68401	303565
G6PD	glucose-6-phosphate dehydrogenase	Q00612	-1.379	2.29E-06	1.02E-04	4	Cytoplasm	enzyme			2539	14381	24377
GABRA1	gamma-aminobutyric acid (GABA) A receptor, alpha 1	P62812	-1.204	3.02E-01	6.59E-01	3	Plasma Membrane	ion channel		methohexital, primidone, meprobamate, aspirin/butalbital/caffeine, aspirin/meprobamate, aspirin/butalbital/caffeine/codeine, hexobarbital, pagoclone, ethchlorvynol, alphadolone, SEP 174559, heptabarbital, zopiclone, glutethimide, clobazam, nitrazepam, phentermine/topiramate, caffeine/ethanol, adinazolam, butobarbital, acetaminophen/butalbital/caffeine, sevoflurane, isoflurane, gaboxadol, isoniazi…	2554	14394	29705
GABRD	gamma-aminobutyric acid (GABA) A receptor, delta	P22933	2.481	2.16E-01	5.85E-01	3	Plasma Membrane	ion channel		pagoclone, alphadolone, SEP 174559, nitrazepam, tracazolate, adinazolam, sevoflurane, isoflurane, gaboxadol, felbamate, etomidate, muscimol, halothane, fluoxetine/olanzapine, estazolam, eszopiclone, quazepam, diazepam, temazepam, zolpidem, lorazepam, olanzapine, triazolam, clonazepam, flurazepam, midazolam, oxazepam, zaleplon, secobarbital, phenobarbital, pentobarbital, ezogabine, desflurane, met…	2563	14403	29689
GABRG2	gamma-aminobutyric acid (GABA) A receptor, gamma 2	P22723-2	1.262	1.12E-09	9.73E-08	3	Plasma Membrane	ion channel		pagoclone, alphadolone, SEP 174559, clobazam, nitrazepam, tracazolate, adinazolam, sevoflurane, isoflurane, gaboxadol, isoniazid, felbamate, etomidate, muscimol, halothane, fluoxetine/olanzapine, estazolam, clorazepate, eszopiclone, quazepam, amitriptyline/chlordiazepoxide, diazepam, temazepam, zolpidem, chlordiazepoxide, lorazepam, olanzapine, triazolam, flumazenil, clonazepam, flurazepam, midaz…	2566	14406	29709
GDPD5	glycerophosphodiester phosphodiesterase domain containing 5	Q640M6	-3.503	1.47E-07	9.17E-06		Other	enzyme			81544	233552	499211
GFPT1	glutamine--fructose-6-phosphate transaminase 1	P47856-2	-1.302	1.94E-07	1.20E-05		Cytoplasm	enzyme			2673	14583	297417
GPX3	glutathione peroxidase 3	D3Z2Y7	1.995	5.20E-14	8.35E-12	3	Extracellular Space	enzyme	unspecified application		2878	14778	64317
GRIA1	glutamate receptor, ionotropic, AMPA 1	Q7TNB5	-1.142	3.24E-01	6.67E-01	4	Plasma Membrane	ion channel		talampanel, farampator, LY451395, tezampanel, perampanel, sevoflurane, isoflurane, desflurane, methoxyflurane, enflurane	2890	14799	50592
GRM1	glutamate receptor, metabotropic 1	P97772	-1.573	3.74E-02	2.46E-01		Plasma Membrane	G-protein coupled receptor	efficacy	fasoracetam	2911	14816	24414
GSTT2/GSTT2B	glutathione S-transferase theta 2 (gene/pseudogene)	Q61133	2.254	1.33E-06	6.20E-05		Cytoplasm	enzyme			2953|653689	14872	29487
H3F3A/H3F3B	H3 histone, family 3A	E0CZ27	2.737	1.12E-20	3.04E-18		Nucleus	other	diagnosis		3020|3021	15078|15081	117056|100361558
HACD3	3-hydroxyacyl-CoA dehydratase 3	Q8K2C9	1.355	8.19E-06	3.27E-04	8	Cytoplasm	enzyme			51495	57874	300783
HAP1	huntingtin-associated protein 1	O35668	1.436	4.06E-05	1.34E-03	3,5	Cytoplasm	other			9001	15114	29430
HOMER1	homer scaffolding protein 1	Q9Z2Y3	1.092	5.74E-01	8.25E-01	4	Plasma Membrane	other			9456	26556	29546
HPGDS	hematopoietic prostaglandin D synthase	Q9JHF7	-1.480	7.14E-08	4.71E-06	4	Cytoplasm	enzyme			27306	54486	58962
HSPA13	heat shock protein 70kDa family, member 13	Q8BM72	-1.346	6.95E-06	2.85E-04		Cytoplasm	other			6782	110920	29734
HSPD1	heat shock 60kDa protein 1 (chaperonin)	P63038	-1.066	6.41E-01	8.57E-01	5	Cytoplasm	enzyme	diagnosis,prognosis		3329	15510	63868
HSPG2	heparan sulfate proteoglycan 2	B1B0C7	2.867	3.98E-08	2.69E-06	1	Extracellular Space	enzyme	unspecified application		3339	15530
HTR6	5-hydroxytryptamine (serotonin) receptor 6, G protein-coupled	--				2	Plasma Membrane	G-protein coupled receptor		asenapine, WAY-181187, sertindole	3362	15565	64354
HTT	huntingtin	G3X9H5	-1.024	8.86E-01	9.64E-01	3	Cytoplasm	transcription regulator	unspecified application		3064	15194	29424
IL1B	interleukin 1, beta	--				1,4	Extracellular Space	cytokine	diagnosis,efficacy,prognosis	canakinumab, gevokizumab, canakinumab/INS, gallium nitrate	3553	16176	24494
ILK	integrin-linked kinase	O55222	2.307	3.47E-09	2.86E-07	4	Plasma Membrane	kinase			3611	16202	170922
INHBA	inhibin, beta A	--				2	Extracellular Space	growth factor	diagnosis		3624	16323	29200
ITGA3	integrin, alpha 3 (antigen CD49C, alpha 3 subunit of VLA-3 receptor)	Q62470-3	5670637071.568	0.00E00	0.00E00	5	Plasma Membrane	other	prognosis		3675	16400	360606
ITGA5	integrin, alpha 5 (fibronectin receptor, alpha polypeptide)	--				5	Plasma Membrane	transmembrane receptor	prognosis		3678	16402	315346
ITGB1	integrin, beta 1 (fibronectin receptor, beta polypeptide, antigen CD29 includes MDF2, MSK12)	P09055	1.198	7.68E-02	3.56E-01	1,4,5	Plasma Membrane	transmembrane receptor	disease progression,prognosis		3688	16412	24511
ITIH1	inter-alpha-trypsin inhibitor heavy chain 1	Q61702	2.040	2.79E-05	9.79E-04	11	Extracellular Space	other			3697	16424	306251
ITIH2	inter-alpha-trypsin inhibitor heavy chain 2	Q61703	2.595	1.82E-04	4.74E-03	11	Extracellular Space	other			3698	16425
ITPR1	inositol 1,4,5-trisphosphate receptor, type 1	P11881-3	-1.132	4.45E-01	7.52E-01	3	Cytoplasm	ion channel			3708	16438	25262
KCNH1	potassium channel, voltage gated eag related subfamily H, member 1	Q3UHC9	-1.798	6.23E-08	4.16E-06	10	Plasma Membrane	ion channel			3756	16510	65198
KCNJ10	potassium channel, inwardly rectifying subfamily J, member 10	Q9JM63	2.193	6.12E-17	1.25E-14	3	Plasma Membrane	ion channel			3766	16513	29718
KCNJ16	potassium channel, inwardly rectifying subfamily J, member 16	--				3	Plasma Membrane	ion channel			3773	16517	29719
KCNQ2	potassium channel, voltage gated KQT-like subfamily Q, member 2	B7ZBW1	-1.155	4.71E-01	7.64E-01	3	Plasma Membrane	ion channel		ezogabine	3785	16536	170848
KCNQ3	potassium channel, voltage gated KQT-like subfamily Q, member 3	Q8K3F6	-4.013	3.13E-15	5.47E-13	1	Plasma Membrane	ion channel		ezogabine	3786	110862	29682
KDR	kinase insert domain receptor	--				2	Plasma Membrane	kinase	disease progression,efficacy,prognosis,response to therapy,safety	AEE 788, sunitinib, cediranib, pazopanib, axitinib, tesevatinib, CEP 7055, brivanib alaninate, CHIR-265, lenvatinib, tivozanib, motesanib, OSI-930, telatinib, ramucirumab, cabozantinib, nintedanib, regorafenib, bortezomib/sorafenib, lapatinib/pazopanib, dexamethasone/lenalidomide/sorafenib, bevacizumab/sorafenib, MGCD-265, cabozantinib/erlotinib, famitinib, lucitanib, paclitaxel/ramucirumab, doce…	3791	16542	25589
KIRREL3	kin of IRRE like 3 (Drosophila)	G5E8B6	-2.746	8.97E-07	4.37E-05	3	Extracellular Space	other			84623	67703	315546
KLF10	Kruppel-like factor 10	--				2	Nucleus	transcription regulator			7071	21847	81813
L-dopa	--	--				2	Other	chemical - endogenous mammalian
LAMA4	laminin, alpha 4	P97927	-1.374	1.30E-01	4.68E-01	5	Extracellular Space	enzyme			3910	16775	309816
LAMC1	laminin, gamma 1 (formerly LAMB2)	F8VQJ3	2.355	1.31E-07	8.44E-06	5	Extracellular Space	other			3915	226519	117036
LAMC2	laminin, gamma 2	--				5	Extracellular Space	other	diagnosis		3918	16782	192362
LAMP5	lysosomal-associated membrane protein family, member 5	Q9D387	-3.080	2.02E-12	2.73E-10	5	Cytoplasm	other			24141	76161	362220
LDLR	low density lipoprotein receptor	--				2	Plasma Membrane	transporter	disease progression,unspecified application		3949	16835	300438
LINGO1	leucine rich repeat and Ig domain containing 1	Q9D1T0	-1.286	2.24E-07	1.33E-05	4	Plasma Membrane	other			84894	235402	315691
LMNB1	lamin B1	P14733	1.532	1.62E-16	3.22E-14	12	Nucleus	other			4001	16906	116685
LRRK2	leucine-rich repeat kinase 2	Q5S006	-1.548	2.94E-03	4.31E-02	12	Cytoplasm	kinase	diagnosis		120892	66725	300160
MAP4	microtubule-associated protein 4	A0A0G2JDN7	-1.320	9.19E-07	4.44E-05	1	Cytoplasm	other	efficacy		4134	17758	367171
MAP1LC3B	microtubule-associated protein 1 light chain 3 beta	Q9CQV6	1.772	3.78E-01	7.07E-01	9	Cytoplasm	other			81631	67443	64862
MAP3K1	mitogen-activated protein kinase kinase kinase 1, E3 ubiquitin protein ligase	--				2,3	Cytoplasm	kinase			4214	26401	116667|100912399
MAPK1	mitogen-activated protein kinase 1	P63085	1.049	7.42E-01	9.07E-01	5	Cytoplasm	kinase	efficacy	MAP kinase1 inhibitor, binimetinib, BVD-523, LY-3007113, pexmetinib	5594	26413	116590
MAPK3	mitogen-activated protein kinase 3	Q63844	1.148	2.31E-01	5.99E-01	1	Cytoplasm	kinase	efficacy	BVD-523	5595	26417	50689
MCTP1	multiple C2 domains, transmembrane 1	E9PW38	-2.854	5.03E-07	2.60E-05	2	Other	other			79772	78771	309928
MIF	macrophage migration inhibitory factor (glycosylation-inhibiting factor)	P34884	1.155	4.75E-01	7.66E-01	1	Extracellular Space	cytokine	diagnosis,prognosis,response to therapy		4282	17319	81683
mir-25	microRNA 25	--					Cytoplasm	microRNA	unspecified application		407014|407048|407049|693235	751549|723942|100124470|723926	100314016|100314119|100314004|100314233
MT-CO1	cytochrome c oxidase subunit I	P00397	1.419	4.41E-06	1.88E-04	4	Cytoplasm	enzyme			4512	17708	26195
MTCH1	mitochondrial carrier 1	Q791T5-2	1.551	1.34E-07	8.59E-06	2	Cytoplasm	other			23787	56462	294313
MTTP	microsomal triglyceride transfer protein	O08601	-1.200	6.11E-01	8.45E-01		Cytoplasm	transporter		lomitapide, hesperetin	4547	17777	310900
MYC	v-myc avian myelocytomatosis viral oncogene homolog	--				1	Nucleus	transcription regulator	diagnosis,efficacy,prognosis,response to therapy,unspecified application		4609	17869	24577
MYL4	myosin, light chain 4, alkali; atrial, embryonic	A2A6Q8	-1.209	2.36E-01	6.03E-01	5	Cytoplasm	other			4635	17896	688228
MYOC	myocilin, trabecular meshwork inducible glucocorticoid response	--				5	Cytoplasm	other			4653	17926	81523
NCF1	neutrophil cytosolic factor 1	--				4	Cytoplasm	enzyme	efficacy		653361	17969	114553
NCF2	neutrophil cytosolic factor 2	--				4	Cytoplasm	enzyme			4688	17970	364018
NDUFA9	NADH dehydrogenase (ubiquinone) 1 alpha subcomplex, 9, 39kDa	Q9DC69	1.361	3.22E-07	1.77E-05		Cytoplasm	enzyme			4704	66108	362440
NEUROD2	neuronal differentiation 2	--					Nucleus	transcription regulator			4761	18013	54276
NGB	neuroglobin	Q9ER97	2.591	3.33E-13	4.82E-11	4	Cytoplasm	transporter			58157	64242	85382
nitric oxide	--	--				4	Other	chemical - endogenous mammalian	diagnosis,efficacy
NRP1	neuropilin 1	P97333	2.261	8.46E-05	2.49E-03	2	Plasma Membrane	transmembrane receptor	diagnosis,efficacy		8829	18186	246331
NUDT5	nudix (nucleoside diphosphate linked moiety X)-type motif 5	Q9JKX6	1.711	2.54E-08	1.77E-06		Cytoplasm	phosphatase			11164	53893	361274
OPHN1	oligophrenin 1	Q99J31	-1.416	1.83E-05	6.78E-04	4	Cytoplasm	other			4983	94190	312108
OTOF	otoferlin	D3YXV0	-2.531	1.43E-07	9.02E-06	4	Plasma Membrane	other			9381	83762	84573
PAX6	paired box 6	--				2	Nucleus	transcription regulator			5080	18508	25509
PDE10A	phosphodiesterase 10A	Q8CA95-3	-1.592	9.93E-14	1.55E-11	3	Cytoplasm	enzyme		aspirin/dipyridamole/telmisartan, triflusal, dipyridamole, aspirin/dipyridamole	10846	23984	63885
PDLIM4	PDZ and LIM domain 4	P70271	4.041	6.21E-06	2.58E-04	4	Plasma Membrane	other	diagnosis		8572	30794	24915
PGR	progesterone receptor	--				2	Nucleus	ligand-dependent nuclear receptor	diagnosis,efficacy,response to therapy,unspecified application	misoprostol, dienogest, ulipristal acetate, asoprisnil, ethynodiol diacetate, norethindrone acetate, ethinyl estradiol/ethynodiol diacetate, estradiol cypionate/medroxyprogesterone acetate, tosagestin, estradiol/norethindrone acetate, ZK 230211, etonogestrel, nestorone, telapristone acetate, ethinyl estradiol/etonogestrel, 17alpha-hydroxyprogesterone caproate, leuprolide acetate/norethindrone ace…	5241	18667	25154
PIKFYVE	phosphoinositide kinase, FYVE finger containing	D3Z5N5	-1.453	5.04E-06	2.14E-04	9	Cytoplasm	kinase			200576	18711	316457
PITPNM2	phosphatidylinositol transfer protein, membrane-associated 2	Q6ZPQ6-2	-1.630	9.12E-06	3.56E-04	2	Cytoplasm	enzyme			57605	19679	304474
PPARD	peroxisome proliferator-activated receptor delta	--				4	Nucleus	ligand-dependent nuclear receptor	diagnosis	treprostinil, icosapent, GW501516, bezafibrate	5467	19015	25682
PPARG	peroxisome proliferator-activated receptor gamma	--				4	Nucleus	ligand-dependent nuclear receptor	diagnosis,efficacy,unspecified application	icosapent, amlodipine/telmisartan, inolitazone, aleglitazar, aspirin/dipyridamole/telmisartan, clopidogrel/telmisartan, glimepiride/rosiglitazone, nicotinic acid/pioglitazone, alogliptin/pioglitazone, glimepiride/pioglitazone, rosiglitazone, farglitazar, sulfasalazine, pioglitazone, telmisartan, tesaglitazar, troglitazone, hydrochlorothiazide/telmisartan, balsalazide, mesalamine, bezafibrate	5468	19016	25664
PPP2R2D	protein phosphatase 2, regulatory subunit B, delta	Q925E7	-1.609	5.10E-13	7.22E-11	2	Nucleus	phosphatase			55844	52432	246255
PPP4R4	protein phosphatase 4, regulatory subunit 4	Q8C0Y0	-1.482	1.50E-06	6.98E-05	2	Cytoplasm	other			57718	74521	500711
PRKAA2	protein kinase, AMP-activated, alpha 2 catalytic subunit	Q8BRK8	1.960	3.41E-11	4.05E-09	4	Cytoplasm	kinase			5563	108079	78975
PRKCG	protein kinase C, gamma	P63318	-1.528	7.05E-04	1.39E-02	3	Cytoplasm	kinase		ingenol mebutate	5582	18752	24681
PSAP	prosaposin	E9PZ00	1.293	2.62E-01	6.34E-01	2	Extracellular Space	other			5660	19156	25524
PTGER2	prostaglandin E receptor 2 (subtype EP2), 53kDa	--				4,15	Plasma Membrane	G-protein coupled receptor		misoprostol, prostaglandin E2, prostaglandin E1, CP 533536, diclofenac/misoprostol	5732	19217	81752
PTGFRN	prostaglandin F2 receptor inhibitor	Q9WV91	-1.469	2.22E-07	1.33E-05	5	Plasma Membrane	other			5738	19221	29602
PTGS2	prostaglandin-endoperoxide synthase 2 (prostaglandin G/H synthase and cyclooxygenase)	--				2,4	Cytoplasm	enzyme	diagnosis,disease progression,efficacy,prognosis,unspecified application	acetaminophen/pentazocine, acetaminophen/clemastine/pseudoephedrine, aspirin/butalbital/caffeine, acetaminophen/caffeine/dihydrocodeine, aspirin/hydrocodone, aspirin/oxycodone, acetaminophen/aspirin/caffeine, aspirin/pravastatin, acetaminophen/dexbrompheniramine/pseudoephedrine, aspirin/meprobamate, aspirin/caffeine/propoxyphene, aspirin/butalbital/caffeine/codeine, aspirin/caffeine/dihydrocodein…	5743	19225	29527
PURB	purine-rich element binding protein B	O35295	1.696	3.19E-10	3.21E-08	3	Nucleus	transcription regulator			5814	19291	498407
PYCARD	PYD and CARD domain containing	Q9EPB4	-1.282	1.15E-09	9.78E-08	4	Cytoplasm	transcription regulator	diagnosis		29108	66824	282817
RAD21	RAD21 cohesin complex component	Q61550	-2.498	7.23E-10	6.51E-08	14	Nucleus	other			5885	19357	314949
RARA	retinoic acid receptor, alpha	--				1	Nucleus	ligand-dependent nuclear receptor	diagnosis	etretinate, daunorubicin/tretinoin, idarubicin/tretinoin, doxorubicin/tretinoin, adapalene, arsenic trioxide, isotretinoin, tazarotene, acitretin, tretinoin, tamibarotene, alitretinoin	5914	19401	24705
RASGRF1	Ras protein-specific guanine nucleotide-releasing factor 1	P27671	-1.076	7.06E-01	8.87E-01	4	Cytoplasm	other			5923	19417	192213
RHOA	ras homolog family member A	Q9QUI0	1.085	3.92E-01	7.16E-01	4	Cytoplasm	enzyme			387	11848	117273
ROBO1	roundabout guidance receptor 1	G5E843	-1.636	1.22E-41	6.59E-39	2	Plasma Membrane	transmembrane receptor			6091	19876	58946
RPE	ribulose-5-phosphate-3-epimerase	Q8VEE0	1.559	9.14E-09	6.87E-07		Cytoplasm	enzyme			6120	66646	501157
RPL3	ribosomal protein L3	P27659	2.266	2.16E-10	2.25E-08		Nucleus	other		omacetaxine mepesuccinate	6122	27367	300079
RPL6	ribosomal protein L6	P47911	2.081	1.63E-08	1.17E-06	1	Nucleus	other	unspecified application		6128	432502|19988	117042
RPL22	ribosomal protein L22	P67984	1.448	2.30E-05	8.16E-04	1	Nucleus	other			6146	19934	81768
RPL23	ribosomal protein L23	P62830	1.561	4.70E-11	5.47E-09	1	Cytoplasm	other			9349	65019	29282
RPL27	ribosomal protein L27	P61358	1.375	2.40E-16	4.60E-14	1	Cytoplasm	other			6155	19942	64306
RPL13A	ribosomal protein L13a	P19253	1.710	6.66E-07	3.31E-05		Cytoplasm	other			23521	22121	317646
RPL37A	ribosomal protein L37a	P61514	1.525	1.78E-10	1.96E-08	5	Cytoplasm	other			6168	19981	100361520
RPLP0	ribosomal protein, large, P0	P14869	2.118	1.54E-25	5.39E-23	1	Cytoplasm	other			6175	11837	64205
RPS14	ribosomal protein S14	P62264	2.264	8.12E-08	5.30E-06	3	Cytoplasm	translation regulator			6208	20044	29284
RPS16	ribosomal protein S16	P14131	2.419	3.77E-12	4.76E-10	1	Cytoplasm	other			6217	20055	140655
RPS19	ribosomal protein S19	Q9CZX8	1.505	2.88E-11	3.50E-09	1	Cytoplasm	other			6223	20085	29287|100910336
RPS24	ribosomal protein S24	P62849-2	1.702	1.13E-08	8.16E-07		Cytoplasm	other	unspecified application		6229	20088	81776
RPS15A	ribosomal protein S15a	P62245	1.569	5.94E-10	5.51E-08	1	Cytoplasm	other			6210	267019	117053
RPS6KB1	ribosomal protein S6 kinase, 70kDa, polypeptide 1	Q8BSK8-2	1.232	6.03E-01	8.40E-01	5	Cytoplasm	kinase	diagnosis,efficacy,prognosis		6198	72508	83840
S1PR1	sphingosine-1-phosphate receptor 1	--				2	Plasma Membrane	G-protein coupled receptor		fingolimod phosphate	1901	13609	29733
SERPINC1	serpin peptidase inhibitor, clade C (antithrombin), member 1	P32261	2.308	5.15E-23	1.55E-20	1	Extracellular Space	enzyme	diagnosis,unspecified application	dalteparin, heparin, enoxaparin, ardeparin, SR-123781A, glucuronyl glucosamine glycan sulfate, fondaparinux, nadroparin	462	11905	304917
SLC18A2	solute carrier family 18 (vesicular monoamine transporter), member 2	Q8BRU6	-1.539	7.99E-29	3.65E-26	2	Plasma Membrane	transporter		deserpidine/methyclothiazide, deserpidine, secologanin tryptamine alkaloid derivative, methamphetamine, amphetamine, tetrabenazine, reserpine/trichloromethiazide, chlorothiazide/reserpine, chlorthalidone/reserpine, hydralazine/hydrochlorothiazide/reserpine, hydroflumethiazide/reserpine, polythiazide/reserpine, hydrochlorothiazide/reserpine, N-methyl-3,4-methylenedioxyamphetamine, reserpine	6571	214084	25549
SLC25A27	solute carrier family 25, member 27	Q9D6D0	1.404	6.46E-06	2.67E-04	7	Cytoplasm	transporter			9481	74011	85262
SLC4A3	solute carrier family 4 (anion exchanger), member 3	P16283	-1.556	1.04E-08	7.63E-07		Plasma Membrane	transporter			6508	20536	24781
SLCO1C1	solute carrier organic anion transporter family, member 1C1	--					Plasma Membrane	transporter			53919	58807	84511
SMAD2	SMAD family member 2	Q62432-2	-2.801	3.09E-07	1.73E-05	2	Nucleus	transcription regulator			4087	17126	29357
SMAD4	SMAD family member 4	P97471	-1.268	4.64E-01	7.61E-01	1	Nucleus	transcription regulator	prognosis		4089	17128	50554
SMURF2	SMAD specific E3 ubiquitin protein ligase 2	--					Cytoplasm	enzyme			64750	66313	303614
SOX5	SRY (sex determining region Y)-box 5	--					Nucleus	transcription regulator			6660	20678	140587
SOX6	SRY (sex determining region Y)-box 6	--					Nucleus	transcription regulator			55553	20679	293165
SP1	Sp1 transcription factor	--				1	Nucleus	transcription regulator			6667	20683	24790
STUB1	STIP1 homology and U-box containing protein 1, E3 ubiquitin protein ligase	Q9WUD1	1.636	9.81E-09	7.29E-07	4	Cytoplasm	enzyme			10273	56424	287155
STX16	syntaxin 16	Q8BVI5	1.307	4.98E-27	2.11E-24		Cytoplasm	transporter			8675	228960	362283
SV2C	synaptic vesicle glycoprotein 2C	Q69ZS6	-1.977	1.81E-09	1.51E-07	2	Plasma Membrane	other			22987	75209	29643
TACC2	transforming, acidic coiled-coil containing protein 2	Q9JJG0-3	-2.122	2.53E-08	1.77E-06		Nucleus	other	diagnosis		10579	57752	309025
TACR1	tachykinin receptor 1	--				3	Plasma Membrane	G-protein coupled receptor		fosaprepitant dimeglumine, AV608, casopitant, SLV317, netupitant, netupitant/palonosetron, aprepitant	6869	21336	24807
TGFB1	transforming growth factor, beta 1	--				1	Extracellular Space	growth factor	diagnosis,efficacy,prognosis,safety,unspecified application	dalantercept	7040	21803	59086
TGFBR1	transforming growth factor, beta receptor 1	--				2	Plasma Membrane	kinase	disease progression,prognosis	galunisertib, TEW-7197	7046	21812	29591
THRA	thyroid hormone receptor, alpha	--				3,5	Nucleus	ligand-dependent nuclear receptor		3,5-diiodothyropropionic acid, denosumab/levothyroxine, amiodarone, levothyroxine, dextrothyroxine, L-triiodothyronine	7067	21833	81812
TIAM1	T-cell lymphoma invasion and metastasis 1	G3UWG2	-1.331	1.97E-04	5.09E-03	3	Cytoplasm	other			7074	21844	304109
TMEFF2	transmembrane protein with EGF-like and two follistatin-like domains 2	Q9QYM9-2	-1.439	1.84E-05	6.78E-04	2	Cytoplasm	other			23671	56363
TP53	tumor protein p53	--				1,3	Nucleus	transcription regulator	diagnosis,disease progression,efficacy,prognosis,response to therapy,unspecified application	CGM097, kevetrin	7157	22059	24842
TP63	tumor protein p63	--					Nucleus	transcription regulator	diagnosis,efficacy,prognosis,unspecified application		8626	22061	246334
TSC1	tuberous sclerosis 1	Q9EP53-4	-1.575	2.02E-17	4.80E-15	5	Cytoplasm	other			7248	64930	60445
TSC22D1	TSC22 domain family, member 1	D3Z0V7	-1.696	8.89E-07	4.36E-05	3	Nucleus	transcription regulator			8848	21807	498545
TSPAN3	tetraspanin 3	--				5	Plasma Membrane	other			10099	56434	300733
VIM	vimentin	A0A0A6YWC8	1.089	6.65E-01	8.67E-01	1,5	Cytoplasm	other	diagnosis,efficacy,prognosis		7431	22352	81818
VMP1	vacuole membrane protein 1	Q99KU0	-2.370	1.13E-09	9.73E-08	2	Plasma Membrane	other			81671	75909	192129
WASF2	WAS protein family, member 2	Q8BH43	-1.890	9.55E-06	3.68E-04	3	Plasma Membrane	other			10163	242687
WDR44	WD repeat domain 44	Q6NVE8	-1.488	2.30E-05	8.16E-04		Cytoplasm	other			54521	72404	246152
WNT5A	wingless-type MMTV integration site family, member 5A	--				3	Extracellular Space	cytokine			7474	22418	64566
YES1	YES proto-oncogene 1, Src family tyrosine kinase	Q04736	-1.634	1.82E-10	1.96E-08	3	Cytoplasm	kinase		dasatinib, dasatinib/dexamethasone/vincristine	7525	22612	24884
ZEB2	zinc finger E-box binding homeobox 2	--				2	Nucleus	transcription regulator			9839	24136	311071
ZFYVE27	zinc finger, FYVE domain containing 27	Q3TXX3-2	1.210	7.50E-02	3.51E-01	8	Plasma Membrane	other			118813	319740	309376
ZNF423	zinc finger protein 423	--					Nucleus	transcription regulator			23090	94187	94188

## Sheet: CPs
© 2000-2015 QIAGEN. All rights reserved.
Ingenuity Canonical Pathways	-log(p-value)	Ratio	z-score	Molecules
EIF2 Signaling	9.11E00	9.77E-02	2.828	RPL13A,RPL22,RPS24,RPL37A,RPL23,RPS14,RPL6,RPS19,RPS16,RPLP0,RPS15A,RPL3,RPL27
mTOR Signaling	3.02E00	4.55E-02	NaN	RPS19,RPS16,RPS15A,PRKAA2,RPS24,TSC1,RPS14
Regulation of eIF4 and p70S6K Signaling	2.96E00	5.22E-02	NaN	RPS19,RPS16,ITGA3,RPS15A,RPS24,RPS14
Pentose Phosphate Pathway	2.56E00	2.5E-01	NaN	G6PD,RPE
Histamine Degradation	2.28E00	1.82E-01	NaN	ALDH3A2,ALDH1A1
Oxidative Ethanol Degradation III	2.28E00	1.82E-01	NaN	ALDH3A2,ALDH1A1
Putrescine Degradation III	2.2E00	1.67E-01	NaN	ALDH3A2,ALDH1A1
Glutathione Redox Reactions I	2.07E00	1.43E-01	NaN	GPX3,GSTT2/GSTT2B
Fatty Acid α-oxidation	2.07E00	1.43E-01	NaN	ALDH3A2,ALDH1A1
Ethanol Degradation IV	2.07E00	1.43E-01	NaN	ALDH3A2,ALDH1A1
Tryptophan Degradation X (Mammalian, via Tryptamine)	2.01E00	1.33E-01	NaN	ALDH3A2,ALDH1A1
Dopamine Degradation	1.95E00	1.25E-01	NaN	ALDH3A2,ALDH1A1
Glutathione-mediated Detoxification	1.85E00	1.11E-01	NaN	GSTT2/GSTT2B,HPGDS
Ethanol Degradation II	1.81E00	1.05E-01	NaN	ALDH3A2,ALDH1A1
Noradrenaline and Adrenaline Degradation	1.65E00	8.7E-02	NaN	ALDH3A2,ALDH1A1
GABA Receptor Signaling	1.59E00	4.76E-02	NaN	ADCY3,GABRG2,KCNQ3
Phenylethylamine Degradation I	1.52E00	3.33E-01	NaN	ALDH3A2
UDP-N-acetyl-D-glucosamine Biosynthesis II	1.52E00	3.33E-01	NaN	GFPT1
Pentose Phosphate Pathway (Oxidative Branch)	1.4E00	2.5E-01	NaN	G6PD
Pentose Phosphate Pathway (Non-oxidative Branch)	1.4E00	2.5E-01	NaN	RPE
Serotonin Degradation	1.36E00	6.06E-02	NaN	ALDH3A2,ALDH1A1
NAD Phosphorylation and Dephosphorylation	1.3E00	2E-01	NaN	ACP1
Serotonin Receptor Signaling	1.23E00	5.13E-02	NaN	ADCY3,SLC18A2
CDK5 Signaling	1.21E00	3.37E-02	NaN	ADCY3,ITGA3,LAMC1
Prostanoid Biosynthesis	1.06E00	1.11E-01	NaN	HPGDS
PI3K/AKT Signaling	1.03E00	2.8E-02	NaN	ITGA3,TSC1,ILK
PTEN Signaling	1.03E00	2.8E-02	NaN	BMPR1A,ITGA3,ILK
Extrinsic Prothrombin Activation Pathway	1.01E00	1E-01	NaN	SERPINC1
Phenylalanine Degradation IV (Mammalian, via Side Chain)	1.01E00	1E-01	NaN	ALDH3A2
PXR/RXR Activation	9.99E-01	3.77E-02	NaN	ALDH3A2,ALDH1A1
Aryl Hydrocarbon Receptor Signaling	9.47E-01	2.59E-02	NaN	ALDH3A2,GSTT2/GSTT2B,ALDH1A1
Pyridoxal 5'-phosphate Salvage Pathway	9.46E-01	3.51E-02	NaN	CSNK1D,PRKAA2
3-phosphoinositide Biosynthesis	9.14E-01	2.5E-02	NaN	ACP1,PIKFYVE,NUDT5
NAD Salvage Pathway II	9.07E-01	7.69E-02	NaN	ACP1
eNOS Signaling	8.83E-01	2.42E-02	NaN	ADCY3,PRKAA2,STUB1
Agrin Interactions at Neuromuscular Junction	8.53E-01	3.08E-02	NaN	ITGA3,LAMC1
Granzyme B Signaling	8.49E-01	6.67E-02	NaN	LMNB1
Cardiomyocyte Differentiation via BMP Receptors	8.23E-01	6.25E-02	NaN	BMPR1A
Dopamine Receptor Signaling	8.12E-01	2.9E-02	NaN	ADCY3,SLC18A2
DNA Methylation and Transcriptional Repression Signaling	7.99E-01	5.88E-02	NaN	DNMT1
D-myo-inositol (1,4,5)-Trisphosphate Biosynthesis	7.99E-01	5.88E-02	NaN	PIKFYVE
Reelin Signaling in Neurons	7.92E-01	2.82E-02	NaN	ITGA3,YES1
Salvage Pathways of Pyrimidine Ribonucleotides	7.92E-01	2.82E-02	NaN	CSNK1D,PRKAA2
Dopamine-DARPP32 Feedback in cAMP Signaling	7.85E-01	2.17E-02	NaN	CSNK1D,ADCY3,KCNJ10
Regulation of Actin-based Motility by Rho	7.73E-01	2.74E-02	NaN	ITGA3,PIKFYVE
HIPPO signaling	7.73E-01	2.74E-02	NaN	CSNK1D,SMAD2
FAK Signaling	7.64E-01	2.7E-02	NaN	ITGA3,ARHGAP26
Factors Promoting Cardiogenesis in Vertebrates	7.55E-01	2.67E-02	NaN	BMPR1A,SMAD2
Retinoate Biosynthesis I	7.55E-01	5.26E-02	NaN	ALDH1A1
Pyrimidine Ribonucleotides De Novo Biosynthesis	7.55E-01	5.26E-02	NaN	NUDT5
Pyrimidine Ribonucleotides Interconversion	7.55E-01	5.26E-02	NaN	NUDT5
Protein Kinase A Signaling	7.47E-01	1.69E-02	-0.447	ADD1,ADCY3,ACP1,H3F3A/H3F3B,PDE10A
Sertoli Cell-Sertoli Cell Junction Signaling	7.41E-01	2.07E-02	NaN	CLDN11,ITGA3,ILK
Neuregulin Signaling	7.38E-01	2.6E-02	NaN	TMEFF2,ITGA3
Superpathway of Inositol Phosphate Compounds	7.24E-01	2.03E-02	NaN	ACP1,PIKFYVE,NUDT5
RhoGDI Signaling	7.18E-01	2.01E-02	NaN	ITGA3,PIKFYVE,WASF2
Intrinsic Prothrombin Activation Pathway	7.16E-01	4.76E-02	NaN	SERPINC1
TGF-β Signaling	7.12E-01	2.5E-02	NaN	BMPR1A,SMAD2
PPARα/RXRα Activation	7.06E-01	1.99E-02	NaN	ADCY3,SMAD2,PRKAA2
p53 Signaling	6.88E-01	2.41E-02	NaN	CSNK1D,ADGRB1
Oxidative Phosphorylation	6.8E-01	2.38E-02	NaN	MT-CO1,NDUFA9
FXR/RXR Activation	6.73E-01	2.35E-02	NaN	APOB,G6PC3
Gustation Pathway	6.65E-01	2.33E-02	NaN	ADCY3,PDE10A
AMPK Signaling	6.62E-01	1.89E-02	NaN	PRKAA2,ELAVL1,TSC1
Coagulation System	6.48E-01	4E-02	NaN	SERPINC1
LPS/IL-1 Mediated Inhibition of RXR Function	6.37E-01	1.83E-02	NaN	ALDH3A2,GSTT2/GSTT2B,ALDH1A1
RAR Activation	6.37E-01	1.83E-02	NaN	ADCY3,ALDH1A1,SMAD2
Antiproliferative Role of TOB in T Cell Signaling	6.34E-01	3.85E-02	NaN	SMAD2
Integrin Signaling	6.17E-01	1.79E-02	NaN	ITGA3,ARHGAP26,ILK
Role of Tissue Factor in Cancer	6.16E-01	2.15E-02	NaN	ITGA3,YES1
Rac Signaling	6.09E-01	2.13E-02	NaN	ITGA3,PIKFYVE
tRNA Charging	6.06E-01	3.57E-02	NaN	FARS2
Triacylglycerol Biosynthesis	6.06E-01	3.57E-02	NaN	PPP2R2D
Cellular Effects of Sildenafil (Viagra)	5.96E-01	2.08E-02	NaN	ADCY3,KCNQ3
phagosome maturation	5.96E-01	2.08E-02	NaN	PIKFYVE,STX16
tRNA Splicing	5.92E-01	3.45E-02	NaN	PDE10A
Actin Cytoskeleton Signaling	5.89E-01	1.72E-02	NaN	ITGA3,PIKFYVE,WASF2
Circadian Rhythm Signaling	5.8E-01	3.33E-02	NaN	CSNK1D
D-myo-inositol (1,4,5,6)-Tetrakisphosphate Biosynthesis	5.77E-01	2.02E-02	NaN	ACP1,NUDT5
D-myo-inositol (3,4,5,6)-tetrakisphosphate Biosynthesis	5.77E-01	2.02E-02	NaN	ACP1,NUDT5
Inhibition of Angiogenesis by TSP1	5.56E-01	3.12E-02	NaN	HSPG2
Gαs Signaling	5.53E-01	1.94E-02	NaN	ADD1,ADCY3
Inhibition of Matrix Metalloproteases	5.45E-01	3.03E-02	NaN	HSPG2
Estrogen Receptor Signaling	5.36E-01	1.89E-02	NaN	G6PC3,H3F3A/H3F3B
D-myo-inositol-5-phosphate Metabolism	5.25E-01	1.85E-02	NaN	ACP1,NUDT5
Mechanisms of Viral Exit from Host Cells	5.13E-01	2.78E-02	NaN	LMNB1
Human Embryonic Stem Cell Pluripotency	5.09E-01	1.8E-02	NaN	BMPR1A,SMAD2
3-phosphoinositide Degradation	4.99E-01	1.77E-02	NaN	ACP1,NUDT5
Xenobiotic Metabolism Signaling	4.78E-01	1.49E-02	NaN	ALDH3A2,GSTT2/GSTT2B,ALDH1A1
Cardiac β-adrenergic Signaling	4.74E-01	1.69E-02	NaN	ADCY3,PDE10A
Aldosterone Signaling in Epithelial Cells	4.69E-01	1.68E-02	NaN	HSPA13,PIKFYVE
Relaxin Signaling	4.6E-01	1.65E-02	NaN	ADCY3,PDE10A
Tec Kinase Signaling	4.33E-01	1.57E-02	NaN	ITGA3,YES1
Mitotic Roles of Polo-Like Kinase	4.27E-01	2.17E-02	NaN	RAD21
Endometrial Cancer Signaling	4.27E-01	2.17E-02	NaN	ILK
Gap Junction Signaling	4.21E-01	1.54E-02	NaN	CSNK1D,ADCY3
UVB-Induced MAPK Signaling	4.2E-01	2.13E-02	NaN	H3F3A/H3F3B
Eicosanoid Signaling	4.2E-01	2.13E-02	NaN	HPGDS
Amyloid Processing	4.13E-01	2.08E-02	NaN	CSNK1D
Agranulocyte Adhesion and Diapedesis	4.08E-01	1.5E-02	NaN	CLDN11,ITGA3
Granulocyte Adhesion and Diapedesis	4.04E-01	1.49E-02	NaN	CLDN11,ITGA3
Molecular Mechanisms of Cancer	3.98E-01	1.26E-02	NaN	BMPR1A,ADCY3,ITGA3,SMAD2
Tight Junction Signaling	3.97E-01	1.47E-02	NaN	CLDN11,STX16
Germ Cell-Sertoli Cell Junction Signaling	3.93E-01	1.46E-02	NaN	ITGA3,ILK
Role of Wnt/GSK-3β Signaling in the Pathogenesis of Influenza	3.92E-01	1.96E-02	NaN	CSNK1D
Regulation of Cellular Mechanics by Calpain Protease	3.92E-01	1.96E-02	NaN	ITGA3
Mitochondrial Dysfunction	3.89E-01	1.45E-02	NaN	MT-CO1,NDUFA9
Actin Nucleation by ARP-WASP Complex	3.86E-01	1.92E-02	NaN	ITGA3
Hypoxia Signaling in the Cardiovascular System	3.62E-01	1.79E-02	NaN	CSNK1D
NRF2-mediated Oxidative Stress Response	3.5E-01	1.34E-02	NaN	HACD3,GSTT2/GSTT2B
Wnt/β-catenin Signaling	3.5E-01	1.34E-02	NaN	CSNK1D,ILK
GPCR-Mediated Integration of Enteroendocrine Signaling Exemplified by an L Cell	3.4E-01	1.67E-02	NaN	ADCY3
ERK/MAPK Signaling	3.37E-01	1.31E-02	NaN	ITGA3,H3F3A/H3F3B
Caveolar-mediated Endocytosis Signaling	3.34E-01	1.64E-02	NaN	ITGA3
Leptin Signaling in Obesity	3.34E-01	1.64E-02	NaN	ADCY3
HER-2 Signaling in Breast Cancer	3.29E-01	1.61E-02	NaN	TSC1
PEDF Signaling	3.24E-01	1.59E-02	NaN	WASF2
NF-κB Activation by Viruses	3.19E-01	1.56E-02	NaN	ITGA3
PDGF Signaling	3.1E-01	1.52E-02	NaN	ACP1
Ephrin Receptor Signaling	3.07E-01	1.23E-02	NaN	ACP1,ITGA3
Regulation of IL-2 Expression in Activated and Anergic T Lymphocytes	3.05E-01	1.49E-02	NaN	SMAD2
BMP signaling pathway	3.05E-01	1.49E-02	NaN	BMPR1A
Leukocyte Extravasation Signaling	3.01E-01	1.21E-02	NaN	CLDN11,ITGA3
STAT3 Pathway	3.01E-01	1.47E-02	NaN	BMPR1A
Ephrin B Signaling	2.97E-01	1.45E-02	NaN	ACP1
GPCR-Mediated Nutrient Sensing in Enteroendocrine Cells	2.92E-01	1.43E-02	NaN	ADCY3
Melanocyte Development and Pigmentation Signaling	2.88E-01	1.41E-02	NaN	ADCY3
phagosome formation	2.76E-01	1.35E-02	NaN	ITGA3
Virus Entry via Endocytic Pathways	2.72E-01	1.33E-02	NaN	ITGA3
PAK Signaling	2.68E-01	1.32E-02	NaN	ITGA3
VEGF Signaling	2.68E-01	1.32E-02	NaN	ELAVL1
Fcγ Receptor-mediated Phagocytosis in Macrophages and Monocytes	2.64E-01	1.3E-02	NaN	YES1
α-Adrenergic Signaling	2.57E-01	1.27E-02	NaN	ADCY3
Mouse Embryonic Stem Cell Pluripotency	2.57E-01	1.27E-02	NaN	BMPR1A
Phospholipase C Signaling	2.49E-01	1.08E-02	NaN	ADCY3,ITGA3
Paxillin Signaling	2.4E-01	1.19E-02	NaN	ITGA3
Role of Osteoblasts, Osteoclasts and Chondrocytes in Rheumatoid Arthritis	2.38E-01	1.05E-02	NaN	BMPR1A,ITGA3
LXR/RXR Activation	2.33E-01	1.16E-02	NaN	APOB
IL-1 Signaling	2.33E-01	1.16E-02	NaN	ADCY3
Neuropathic Pain Signaling In Dorsal Horn Neurons	2.3E-01	1.15E-02	NaN	KCNQ3
Role of NANOG in Mammalian Embryonic Stem Cell Pluripotency	2.21E-01	1.11E-02	NaN	BMPR1A
Atherosclerosis Signaling	2.21E-01	1.11E-02	NaN	APOB
HGF Signaling	2.18E-01	1.1E-02	NaN	ITGA3
Sphingosine-1-phosphate Signaling	2.18E-01	1.1E-02	NaN	ADCY3
14-3-3-mediated Signaling	2.1E-01	1.06E-02	NaN	TSC1
Pancreatic Adenocarcinoma Signaling	2.1E-01	1.06E-02	NaN	SMAD2
p38 MAPK Signaling	2.07E-01	1.05E-02	NaN	H3F3A/H3F3B
Cdc42 Signaling	2.02E-01	1.03E-02	NaN	ITGA3
Renin-Angiotensin Signaling	1.99E-01	1.02E-02	NaN	ADCY3
Corticotropin Releasing Hormone Signaling	1.99E-01	1.02E-02	NaN	ADCY3

## Sheet: upstream
© 2000-2015 QIAGEN. All rights reserved.
Upstream Regulator	Exp Fold Change	Molecule Type	Predicted Activation State	Activation z-score	p-value of overlap	Target molecules in dataset	Mechanistic Network
MYC		transcription regulator		1.897	1.63E-06	ALCAM,ERAP1,MAP4,RPL22,RPL23,RPL27,RPL6,RPS15A,RPS16,RPS19
CPLX1	1.236	transporter			9.93E-03	CPLX3
CPLX2	-1.316	other			9.93E-03	CPLX3
GABRD	2.481	ion channel			9.93E-03	GABRG2
MTTP	-1.200	transporter			9.93E-03	APOB
ZNF423		transcription regulator			9.93E-03	ADCY3
HAP1	1.436	other			9.93E-03	TSC1
DIO3		enzyme			1.82E-02	ALDH1A1,KCNJ10
AKAP5	-1.236	other			1.98E-02	KCNQ3
FKRP		other			1.98E-02	LAMC1
SERPINC1	2.308	enzyme			1.98E-02	HSPG2
ANGPT1		growth factor			1.98E-02	BMPR1A
DTNA	1.173	other			1.98E-02	KCNJ10
SMURF2		enzyme			1.98E-02	SMAD2
SOX5		transcription regulator			2.95E-02	HSPG2
SOX6		transcription regulator			2.95E-02	HSPG2
GRM1	-1.573	g-protein coupled receptor			2.95E-02	OPHN1
THRA		ligand-dependent nuclear receptor			2.95E-02	KCNJ10
choline		chemical - endogenous mammalian			2.95E-02	DNMT1
SLCO1C1		transporter			3.91E-02	ALDH1A1
mir-25		microrna			3.91E-02	TSC1
EBF1		transcription regulator			3.91E-02	ADCY3
GABRA1	-1.204	ion channel			3.91E-02	GABRG2
acetylcholine		chemical - endogenous mammalian			3.91E-02	KCNQ3
TP63		transcription regulator			4.87E-02	ITGA3
NEUROD2		transcription regulator			4.87E-02	GABRG2
L-dopa		chemical - endogenous mammalian	Inhibited	-2.000	1.00E00	GABRG2,PPP2R2D,PPP4R4,VMP1

## Sheet: networks
© 2000-2015 QIAGEN. All rights reserved.
ID	Molecules in Network	Score	Focus Molecules	Top Diseases and Functions
1	AKT1,ALCAM,ANG,ANGPT1,APP,BAX,beta-estradiol,BMPR1A,CASP3,CTNNB1,E2F1,ERAP1,HSPG2,IL1B,ITGB1,KCNQ3,MAP4,MAPK3,MIF,MYC,RARA,RPL6,RPL22,RPL23,RPL27,RPLP0,RPS16,RPS19,RPS15A,SERPINC1,SMAD4,SP1,TGFB1,TP53,VIM	19	15	Tissue Development, Cell Death and Survival, Cardiovascular System Development and Function
2	ACP1,ACVR2A,ADCY3,APOB,APP,beta-estradiol,CDH2,CDH11,CREB1,HTR6,INHBA,KDR,KLF10,L-dopa,LDLR,MAP3K1,MCTP1,MTCH1,NRP1,PAX6,PGR,PITPNM2,PPP2R2D,PPP4R4,PSAP,PTGS2,ROBO1,S1PR1,SLC18A2,SMAD2,SV2C,TGFBR1,TMEFF2,VMP1,ZEB2	18	14	Embryonic Development, Organismal Development, Cell Morphology
3	ADD1,ADGRB1,AFP,APP,ATXN2,BAIAP2,choline,DLG4,DNMT1,FGF2,FOS,GABRA1,GABRD,GABRG2,GPX3,HAP1,HTT,ITPR1,KCNJ10,KCNJ16,KCNQ2,KIRREL3,MAP3K1,PDE10A,PRKCG,PURB,RPS14,TACR1,THRA,TIAM1,TP53,TSC22D1,WASF2,WNT5A,YES1	18	14	Neurological Disease, Cellular Development, Nervous System Development and Function
4	acetylcholine,ALDH1A1,AP2A2,APP,CASP4,CD36,CIDEA,CPLX2,FABP4,FGF2,G6PD,GRIA1,HOMER1,HPGDS,IL1B,ILK,ITGB1,LINGO1,MT-CO1,NCF1,NCF2,NGB,nitric oxide,OPHN1,OTOF,PDLIM4,PPARD,PPARG,PRKAA2,PTGER2,PTGS2,PYCARD,RASGRF1,RHOA,STUB1	16	13	Free Radical Scavenging, Cardiovascular System Development and Function, Hematological System Development and Function
5	APP,ATN1,BDNF,CBLN1,CD36,CDH11,CLDN11,CPLX2,CPLX3,CSNK1D,CYFIP1,EIF4E,EIF4EBP1,ELAVL1,FGF2,FN1,HAP1,HSPD1,ITGA3,ITGA5,ITGB1,LAMA4,LAMC1,LAMC2,LAMP5,MAPK1,MYL4,MYOC,PTGFRN,RPL37A,RPS6KB1,THRA,TSC1,TSPAN3,VIM	12	11	Cellular Development, Cellular Growth and Proliferation, Nervous System Development and Function
6	ADORA2A,ATP8A1	2	1	Cardiovascular Disease, Cell-To-Cell Signaling and Interaction, Cellular Growth and Proliferation
7	adenosine triphosphate,SLC25A27	2	1	Free Radical Scavenging, Small Molecule Biochemistry, Carbohydrate Metabolism
8	HACD3,ZFYVE27	2	1	Hereditary Disorder, Neurological Disease, Lipid Metabolism
9	MAP1LC3B,PIKFYVE	2	1	Cellular Assembly and Organization, Carbohydrate Metabolism, Cell Morphology
10	EPN1,KCNH1	2	1	Cell-To-Cell Signaling and Interaction, Cellular Growth and Proliferation, Developmental Disorder
11	ITIH1,ITIH2	2	1	Carbohydrate Metabolism, Drug Metabolism, Small Molecule Biochemistry
12	LMNB1,LRRK2	2	1	Embryonic Development, Nervous System Development and Function, Organ Morphology
13	BUB3,BUB1B	2	1	Cellular Assembly and Organization, DNA Replication, Recombination, and Repair, Cell Cycle
14	CASP7,RAD21	2	1	Developmental Disorder, Hereditary Disorder, Cell Cycle
15	CENPE,PTGER2	2	1	Cell Cycle, Cell-To-Cell Signaling and Interaction, Cellular Compromise

## Sheet: dis and bio
© 2000-2015 QIAGEN. All rights reserved.
Categories	Diseases or Functions Annotation	p-Value	Predicted Activation State	Activation z-score	Molecules	# Molecules
Gene Expression, Protein Synthesis	translation of mRNA	1.90E-04			ELAVL1,PURB,RPL13A,RPL23,RPS14,RPS24,TSC1	7
Cell-To-Cell Signaling and Interaction	attachment of radial glial cells	3.02E-04			HSPG2,LAMC1	2
Cell-To-Cell Signaling and Interaction	attachment of cells	5.09E-04			ACP1,HSPG2,ILK,LAMC1	4
Protein Synthesis	metabolism of protein	5.14E-04			ELAVL1,HSPG2,PURB,RPL13A,RPL23,RPS14,RPS24,TSC1	8
Protein Synthesis	translation of protein	6.38E-04			ELAVL1,PURB,RPL13A,RPL23,RPS14,RPS24,TSC1	7
Cell Morphology	morphology of cells	9.53E-04			ADD1,BMPR1A,BUB3,HSPG2,ITGA3,KCNJ10,LAMC1,LMNB1,OPHN1,OTOF,PIKFYVE,PTGFRN,PYCARD,ROBO1,SLC18A2,SLC4A3,SMAD2,STUB1,TSC1,WASF2	20
Cell Morphology, Nervous System Development and Function	abnormal morphology of radial glial cells	2.06E-03			HSPG2,LAMC1	2
Small Molecule Biochemistry	metabolism of aldehyde	2.06E-03			ALDH1A1,ALDH3A2	2
Gene Expression	expression of RNA	2.64E-03		-1.528	BMPR1A,ELAVL1,PURB,RPL13A,RPL23,RPS14,RPS24,SMAD2,TSC1	9
Cellular Development, Nervous System Development and Function, Tissue Development	myelination of neurons	3.36E-03			ILK,KCNJ10,LAMC1	3
Neurological Disease	paralysis	3.49E-03			LAMC1,STUB1	2
Cell Morphology, Cellular Assembly and Organization, Cellular Development, Cellular Function and Maintenance, Nervous System Development and Function, Tissue Development	morphogenesis of neurites	4.18E-03		0.084	ADGRB1,ATXN2,GDPD5,ILK,ITGA3,KIRREL3,LAMC1,LINGO1,NGB,OPHN1,ROBO1,TSC1	12
Cell Morphology, Cellular Assembly and Organization	morphology of nucleus	4.33E-03			BUB3,LMNB1	2
Cellular Assembly and Organization, Cellular Function and Maintenance	organization of cytoskeleton	4.72E-03		-0.347	ADCY3,ADGRB1,ATXN2,CSNK1D,GDPD5,ILK,ITGA3,KIRREL3,LAMC1,LINGO1,MAP4,NGB,OPHN1,RAD21,ROBO1,SERPINC1,TSC1	17
Cell Morphology, Cellular Compromise	vacuolation of cells	6.27E-03			KCNJ10,PIKFYVE	2
Cell Morphology, Nervous System Development and Function	abnormal morphology of neuroglia	7.64E-03			HSPG2,KCNJ10,LAMC1,SLC4A3	4
Cardiovascular System Development and Function, Cellular Development, Organismal Development, Tissue Development	angiogenesis of endothelial cells	8.53E-03			ADGRB1,HSPG2	2
Cellular Assembly and Organization, Cellular Function and Maintenance	microtubule dynamics	8.97E-03		-0.045	ADCY3,ADGRB1,ATXN2,CSNK1D,GDPD5,ILK,ITGA3,KIRREL3,LAMC1,LINGO1,MAP4,NGB,OPHN1,RAD21,ROBO1,TSC1	16
Cell Morphology, Cellular Function and Maintenance, Nervous System Development and Function, Tissue Morphology	length of neurons	9.11E-03		0.085	ADGRB1,BMPR1A,LINGO1,OPHN1	4
Cellular Assembly and Organization, Nervous System Development and Function	formation of myelin sheath	9.78E-03			ILK,PIKFYVE	2
Cell Cycle, DNA Replication, Recombination, and Repair	DNA replication checkpoint of cells	1.01E-02			CENPE	1
Cell Morphology, Nervous System Development and Function, Tissue Morphology	abnormal morphology of Cajal-Retzius neurons	1.01E-02			LAMC1	1
Cell Morphology, Cellular Assembly and Organization	abnormal morphology of Nucleus	1.01E-02			LMNB1	1
Cell-To-Cell Signaling and Interaction, Nervous System Development and Function	adhesion of cortical neurons	1.01E-02			ITGA3	1
Cellular Assembly and Organization	binding of Golgi membrane	1.01E-02			CSNK1D	1
Post-Translational Modification	binding of lipoprotein	1.01E-02			HSPG2	1
Cell Morphology	blebbing of nucleus	1.01E-02			LMNB1	1
Protein Degradation, Protein Synthesis	catabolism of lipoprotein	1.01E-02			HSPG2	1
Cellular Assembly and Organization	cohesion of sister chromatids	1.01E-02			RAD21	1
Cellular Assembly and Organization, Nervous System Development and Function	complexity of basal dendrites	1.01E-02			ITGA3	1
Post-Translational Modification	conversion of protein	1.01E-02			SLC18A2	1
Cell-To-Cell Signaling and Interaction, Cellular Assembly and Organization, Nervous System Development and Function, Tissue Morphology	density of collateral synapses	1.01E-02			ITGA3	1
Cell-To-Cell Signaling and Interaction, Cellular Growth and Proliferation, Nervous System Development and Function	excitation of histaminergic neurons	1.01E-02			GABRG2	1
Cellular Assembly and Organization	formation of GW body	1.01E-02			ELAVL1	1
Cancer, Organismal Injury and Abnormalities, Reproductive System Disease	growth of mammary tumor	1.01E-02			ELAVL1	1
Cellular Function and Maintenance	hyperpolarization of histaminergic neurons	1.01E-02			GABRG2	1
Cardiovascular Disease, Gastrointestinal Disease, Hepatic System Disease	idiopathic portal hypertension	1.01E-02			SMAD2	1
Cellular Function and Maintenance, Molecular Transport	influx of K+	1.01E-02			KCNJ10	1
Cellular Growth and Proliferation, Nervous System Development and Function	inhibition of dentate granule cells	1.01E-02			GABRG2	1
Molecular Transport, Protein Trafficking	internalization of lipoprotein	1.01E-02			HSPG2	1
Cellular Compromise	loss of actin stress fibers	1.01E-02			TSC1	1
Cellular Growth and Proliferation, Embryonic Development	pluripotency of epiblast stem cells	1.01E-02			SMAD2	1
Cell-To-Cell Signaling and Interaction, Cellular Assembly and Organization, Nervous System Development and Function, Tissue Morphology	quantity of axodendritic synapses	1.01E-02			GABRG2	1
Cellular Assembly and Organization	quantity of micronuclei	1.01E-02			BUB3	1
Carbohydrate Metabolism, Lipid Metabolism, Molecular Transport, Small Molecule Biochemistry	quantity of phosphatidylinositol 3,5-diphosphate	1.01E-02			PIKFYVE	1
Cell Morphology, Cellular Assembly and Organization, Nervous System Development and Function, Tissue Morphology	size of apical processes	1.01E-02			ITGA3	1
Cell Morphology, Cellular Assembly and Organization, Nervous System Development and Function, Tissue Morphology	size of basal dendrites	1.01E-02			ITGA3	1
Cell Morphology, Nervous System Development and Function, Tissue Morphology	size of cortical neurons	1.01E-02			TSC1	1
Cell Morphology, Nervous System Development and Function, Tissue Morphology	size of hippocampal neurons	1.01E-02			TSC1	1
Hereditary Disorder, Neurological Disease	spinocerebellar ataxia type 2	1.01E-02			ATXN2	1
Cell-To-Cell Signaling and Interaction, Cellular Assembly and Organization	stabilization of collateral synapses	1.01E-02			ITGA3	1
Inflammatory Disease	swelling of endosomes	1.01E-02			PIKFYVE	1
Carbohydrate Metabolism, Lipid Metabolism, Small Molecule Biochemistry	synthesis of phosphatidylinositol 3,5-diphosphate	1.01E-02			PIKFYVE	1
Carbohydrate Metabolism, Lipid Metabolism, Small Molecule Biochemistry	synthesis of phosphtidylinositol 5-phosphate	1.01E-02			PIKFYVE	1
Lipid Metabolism, Small Molecule Biochemistry	synthesis of prostaglandin D2	1.01E-02			HPGDS	1
Molecular Transport	uptake of K+	1.01E-02			KCNJ10	1
Cell Death and Survival, Cell Morphology, Cellular Compromise, Nervous System Development and Function	vacuolation of spinal neuron	1.01E-02			KCNJ10	1
Cellular Movement	migration of cells	1.12E-02		0.486	ACP1,ADCY3,ADD1,ADGRB1,ALCAM,ATP8A1,BMPR1A,CLDN11,ERAP1,G6PD,ILK,ITGA3,KIRREL3,LAMC1,LMNB1,ROBO1,SERPINC1,WASF2,WDR44	19
Cell Morphology, Cellular Assembly and Organization, Cellular Function and Maintenance	formation of cellular protrusions	1.15E-02		0.269	ADCY3,ADGRB1,ATXN2,CSNK1D,GDPD5,ILK,ITGA3,KIRREL3,LAMC1,LINGO1,NGB,OPHN1,ROBO1,TSC1	14
Cell Morphology, Nervous System Development and Function, Tissue Morphology	abnormal morphology of bipolar cells	1.25E-02			LAMC1,SLC4A3	2
Cellular Development, Nervous System Development and Function, Tissue Development	development of neurons	1.33E-02		0.375	ADCY3,ADGRB1,ATXN2,CSNK1D,GABRG2,GDPD5,ILK,ITGA3,KCNJ10,KIRREL3,LAMC1,LINGO1,NGB,OPHN1,ROBO1,TSC1	16
Nervous System Development and Function	abnormal morphology of central nervous system	1.38E-02			ADCY3,CBLN1,HSPG2,ITGA3,KCNJ10,LAMC1,LMNB1,OPHN1,ROBO1,SLC4A3,STUB1,YES1	12
Cellular Function and Maintenance	hyperpolarization of neurons	1.40E-02			GABRG2,PRKAA2	2
Cell Morphology, Cellular Assembly and Organization, Cellular Development, Cellular Function and Maintenance, Embryonic Development, Nervous System Development and Function, Tissue Development, Tissue Morphology	length of dendritic spines	1.40E-02			ADGRB1,OPHN1	2
Cell Morphology, Cellular Assembly and Organization, Cellular Development, Cellular Function and Maintenance, Nervous System Development and Function, Tissue Development	myelination of axons	1.40E-02			ILK,LAMC1	2
Organismal Development	abnormal morphology of head	1.43E-02			ADCY3,CBLN1,HSPG2,ITGA3,LAMC1,LMNB1,OPHN1,OTOF,ROBO1,SLC4A3,STUB1,YES1	12
Cell Morphology, Cellular Assembly and Organization, Cellular Development, Cellular Function and Maintenance, Nervous System Development and Function, Tissue Development	neuritogenesis	1.81E-02		0.163	ADCY3,ADGRB1,ATXN2,GDPD5,ILK,ITGA3,KIRREL3,LAMC1,LINGO1,NGB,OPHN1,ROBO1,TSC1	13
Cellular Assembly and Organization, Nervous System Development and Function	complexity of dendrites	1.88E-02			BMPR1A,ITGA3	2
Cell-To-Cell Signaling and Interaction, Nervous System Development and Function	adhesion of radial glial cells	2.01E-02			ITGA3	1
Cellular Assembly and Organization	aggregation of membrane rafts	2.01E-02			NGB	1
Cellular Function and Maintenance, Cellular Growth and Proliferation	assembly of mural cells	2.01E-02			SMAD2	1
Cellular Assembly and Organization	association of kinetochores	2.01E-02			RAD21	1
Cellular Assembly and Organization, Cellular Function and Maintenance	association of microtubules	2.01E-02			RAD21	1
Cell Morphology, Cellular Function and Maintenance	autophagy of hippocampal neurons	2.01E-02			TSC1	1
Drug Metabolism, Lipid Metabolism, Small Molecule Biochemistry	binding of paclitaxel	2.01E-02			MAP4	1
Cancer, Neurological Disease, Organismal Injury and Abnormalities	brainstem glioma	2.01E-02			H3F3A/H3F3B	1
Cellular Assembly and Organization, Nervous System Development and Function	complexity of apical processes	2.01E-02			ITGA3	1
Neurological Disease	demyelination of cerebellum	2.01E-02			HPGDS	1
Cell Morphology, Cell-To-Cell Signaling and Interaction, Cellular Function and Maintenance, Nervous System Development and Function	depolarization of astrocytes	2.01E-02			KCNJ10	1
Behavior	depression-related behavior	2.01E-02			TSC1	1
Cellular Development, Hematological System Development and Function, Hematopoiesis, Tissue Development	differentiation of erythroid cells	2.01E-02			RPS19	1
Neurological Disease	drug toxicity of neurons	2.01E-02			SLC18A2	1
Developmental Disorder, Neurological Disease	dysplasia of neurons	2.01E-02			LAMC1	1
Cell Morphology, Cellular Assembly and Organization	elongation of cilia	2.01E-02			ADCY3	1
Nervous System Development and Function	excitation of nerves	2.01E-02			PRKAA2	1
Cellular Movement, Nervous System Development and Function	guidance of corticocortical axons	2.01E-02			ROBO1	1
Cellular Movement, Nervous System Development and Function	guidance of corticofugal fibers	2.01E-02			ROBO1	1
Cellular Movement, Nervous System Development and Function	guidance of corticospinal axon	2.01E-02			ROBO1	1
Cellular Movement, Nervous System Development and Function	guidance of corticothalamic axons	2.01E-02			ROBO1	1
Nervous System Development and Function, Organ Development	hyperexcitation of hippocampus	2.01E-02			TSC1	1
Endocrine System Disorders, Hematological Disease, Metabolic Disease	hypoglycemia	2.01E-02			BMPR1A	1
Cardiovascular System Development and Function	maturation of vasculature	2.01E-02			SMAD2	1
Cellular Movement, Nervous System Development and Function	migration of Cajal-Retzius neurons	2.01E-02			LAMC1	1
Cellular Movement, Nervous System Development and Function	migration of neocortical neurons	2.01E-02			BMPR1A	1
Nervous System Development and Function	pathfinding of olfactory receptor neurons	2.01E-02			ROBO1	1
Small Molecule Biochemistry	production of lactic acid	2.01E-02			SLC25A27	1
Cell Morphology, Nervous System Development and Function	projection of olfactory receptor neurons	2.01E-02			ROBO1	1
Cardiovascular System Development and Function, Organismal Development, Tissue Morphology	quantity of microvessel	2.01E-02			HSPG2	1
Lipid Metabolism, Molecular Transport, Small Molecule Biochemistry	quantity of prostaglandin D2	2.01E-02			HPGDS	1
Cell-To-Cell Signaling and Interaction, Nervous System Development and Function	rebound potentiation of synapse	2.01E-02			GABRG2	1
Drug Metabolism, Lipid Metabolism, Molecular Transport, Small Molecule Biochemistry	release of epoprostenol	2.01E-02			SERPINC1	1
Cardiovascular System Development and Function	revascularization	2.01E-02			ELAVL1	1
Nervous System Development and Function, Organ Morphology, Organismal Development	size of hippocampal commissure	2.01E-02			ROBO1	1
Cell Morphology, Nervous System Development and Function, Tissue Morphology	size of interneurons	2.01E-02			TSC1	1
Cardiovascular System Development and Function, Tissue Morphology	stimulation of endothelial tissue	2.01E-02			SERPINC1	1
Post-Translational Modification	tyrosine nitration of protein	2.01E-02			SLC18A2	1
Cardiovascular System Development and Function, Organismal Development	vascularization of hindlimb	2.01E-02			ELAVL1	1
Embryonic Development, Nervous System Development and Function, Organ Development	stratification of cerebral cortex	2.05E-02			ITGA3,LMNB1	2
Cell Morphology	abnormal morphology of cells	2.32E-02			HSPG2,KCNJ10,LAMC1,LMNB1,OPHN1,OTOF,PIKFYVE,ROBO1,SLC18A2,SLC4A3,STUB1	11
Organismal Survival	organismal death	2.38E-02			KCNJ10,SMAD2,TSC1	3
Cellular Development, Nervous System Development and Function	myelination of cells	2.46E-02			ILK,KCNJ10,LAMC1,TSC1	4
Cell Morphology	projection	2.62E-02			ADCY3,ROBO1	2
Cellular Development, Cellular Growth and Proliferation, Embryonic Development, Nervous System Development and Function, Organ Development, Organismal Development, Tissue Development	proliferation of neural precursor cells	2.80E-02			GDPD5,ILK,LMNB1	3
Cellular Assembly and Organization, Cellular Movement, Nervous System Development and Function	transport of synaptic vesicles	2.80E-02			CPLX3,OPHN1,OTOF	3
Embryonic Development, Nervous System Development and Function, Organ Morphology, Tissue Morphology	quantity of neural precursor cells	2.82E-02			BMPR1A,LMNB1	2
Organ Morphology, Organismal Development	size of brain	2.85E-02		0.440	BMPR1A,LAMC1,LMNB1,OPHN1,ROBO1	5
Cellular Assembly and Organization, Cellular Compromise	accumulation of vacuole	3.00E-02			PIKFYVE	1
Cell-To-Cell Signaling and Interaction, Nervous System Development and Function	activation of CA1 neuron	3.00E-02			KCNJ10	1
Organismal Injury and Abnormalities	bleeding of tissue	3.00E-02			SMAD2	1
Cell Death and Survival, Nervous System Development and Function	cell survival of hippocampal neurons	3.00E-02			PIKFYVE	1
Cellular Assembly and Organization, Cellular Function and Maintenance	formation of macropinosomes	3.00E-02			WASF2	1
Cellular Function and Maintenance	hyperpolarization of POMC neurons	3.00E-02			PRKAA2	1
DNA Replication, Recombination, and Repair, Gene Expression	methylation of DNA	3.00E-02			DNMT1	1
Cell Death and Survival, Cellular Compromise, Neurological Disease, Organismal Injury and Abnormalities, Psychological Disorders, Tissue Morphology	neurodegeneration of striatonigral neurons	3.00E-02			SLC18A2	1
Cellular Development, Cellular Growth and Proliferation, Embryonic Development, Nervous System Development and Function, Organismal Development, Tissue Development	proliferation of neural tube cells	3.00E-02			BMPR1A	1
Cell Morphology, Cellular Development, Embryonic Development, Nervous System Development and Function, Tissue Development	stratification of neurons	3.00E-02			LMNB1	1
Cell-To-Cell Signaling and Interaction, Cellular Assembly and Organization, Cellular Development, Cellular Function and Maintenance, Cellular Growth and Proliferation, Embryonic Development, Nervous System Development and Function, Organ Development, Organismal Development, Tissue Development	synaptogenesis of hippocampal neurons	3.00E-02			ADGRB1	1
Lipid Metabolism, Small Molecule Biochemistry	synthesis of dinoprost	3.00E-02			HPGDS	1
Cancer, Neurological Disease, Organismal Injury and Abnormalities	thalamic astrocytoma	3.00E-02			H3F3A/H3F3B	1
Cellular Assembly and Organization, Cellular Function and Maintenance, Cellular Movement, Molecular Transport, Nervous System Development and Function	exocytosis of synaptic vesicles	3.02E-02			CPLX3,OTOF	2
Cell Morphology, Nervous System Development and Function, Tissue Morphology	abnormal morphology of neurons	3.07E-02			HSPG2,LAMC1,LMNB1,OPHN1,OTOF,ROBO1,SLC18A2,SLC4A3,STUB1	9
Nervous System Development and Function, Tissue Morphology	morphology of nervous tissue	3.39E-02			HSPG2,KCNJ10,LAMC1,LMNB1,OPHN1,OTOF,ROBO1,SLC18A2,SLC4A3,STUB1	10
Nervous System Development and Function, Tissue Morphology	density of neurons	3.61E-02		-0.469	ADGRB1,BMPR1A,ITGA3,OPHN1	4
Carbohydrate Metabolism	synthesis of carbohydrate	3.67E-02			PIKFYVE,PTGFRN	2
Embryonic Development, Organismal Development, Tissue Development	growth of embryonic tissue	3.74E-02			BMPR1A,GDPD5,ILK,LMNB1,TSC1	5
Cellular Assembly and Organization	organization of organelle	3.77E-02			ELFN1,SERPINC1,TSC1	3
Cell-To-Cell Signaling and Interaction, Nervous System Development and Function	auditory evoked potential	3.90E-02			CLDN11,KCNJ10,OTOF	3
Embryonic Development, Organismal Development	development of head	3.97E-02			ADCY3,ADGRB1,BMPR1A,HSPG2,ITGA3,LAMC1,ROBO1,SLC4A3,TACC2,TSC1,WASF2	11
Cell Morphology, Cell-To-Cell Signaling and Interaction, Nervous System Development and Function, Tissue Morphology	abnormal morphology of inner hair cell synaptic ribbon	3.99E-02			OTOF	1
Cell Cycle	arrest in metaphase	3.99E-02			BUB3	1
Neurological Disease, Organismal Injury and Abnormalities	astrocytosis of cerebellum	3.99E-02			HPGDS	1
Neurological Disease, Organismal Injury and Abnormalities	damage of spinal cord	3.99E-02			PYCARD	1
Embryonic Development, Nervous System Development and Function, Organ Development, Organismal Development, Tissue Development	development of ophthalmic branch of trigeminal ganglion	3.99E-02			ROBO1	1
Cellular Development, Connective Tissue Development and Function, Reproductive System Development and Function, Tissue Development	differentiation of endometrial stromal cells	3.99E-02			LAMC1	1
Cell-To-Cell Signaling and Interaction, Nervous System Development and Function	firing of Purkinje cells	3.99E-02			ATXN2	1
Cellular Development, Cellular Growth and Proliferation, Embryonic Development, Nervous System Development and Function, Organ Development, Organismal Development, Respiratory System Development and Function, Tissue Development	formation of olfactory receptor neurons	3.99E-02			ADCY3	1
Cellular Movement, Nervous System Development and Function	guidance of thalamocortical axons	3.99E-02			ROBO1	1
Cellular Function and Maintenance, Molecular Transport	influx of chloride	3.99E-02			GABRG2	1
Cellular Assembly and Organization, Nervous System Development and Function, Tissue Morphology	quantity of perikaryon	3.99E-02			TSC1	1
Cell Morphology, Cellular Assembly and Organization, Cellular Function and Maintenance	reorganization of actin filaments	3.99E-02			SERPINC1	1
Drug Metabolism, Lipid Metabolism, Small Molecule Biochemistry, Vitamin and Mineral Metabolism	synthesis of tretinoin	3.99E-02			ALDH1A1	1
Cell Morphology, Cellular Function and Maintenance, Nervous System Development and Function	transmembrane potential of oligodendrocytes	3.99E-02			KCNJ10	1
Cell Morphology, Cellular Assembly and Organization, Cellular Development, Cellular Function and Maintenance, Embryonic Development, Nervous System Development and Function, Tissue Development, Tissue Morphology	density of dendritic spines	4.03E-02			ADGRB1,ITGA3,OPHN1	3
Cell Morphology	abnormal morphology of plasma membrane	4.04E-02			HSPG2,OPHN1,OTOF,ROBO1,STUB1	5
Nervous System Development and Function, Organ Morphology, Organismal Development	abnormal morphology of brain	4.09E-02			ADCY3,CBLN1,HSPG2,ITGA3,LAMC1,LMNB1,OPHN1,ROBO1,STUB1,YES1	10
Embryonic Development, Organ Development, Organismal Development, Tissue Development	development of sensory organ	4.13E-02			ADCY3,SLC4A3	2
Nervous System Development and Function	myelination	4.62E-02		1.091	ILK,KCNJ10,LAMC1,PIKFYVE,TSC1	5
Cellular Growth and Proliferation	proliferation of cells	4.88E-02		1.917	ACP1,ADCY3,ADGRB1,ALCAM,BMPR1A,BUB3,CLDN11,CSNK1D,CTC1,DNMT1,ERAP1,G6PD,GDPD5,GPX3,H3F3A/H3F3B,HSPG2,ILK,ITGA3,KCNH1,LAMC1,LINGO1,LMNB1,MTCH1,NGB,ROBO1,RPS15A,RPS19,SERPINC1,SLC25A27,SMAD2,STUB1,TACC2,TSC1,TSC22D1	34
Nervous System Development and Function	abnormal morphology of nervous system	4.91E-02			ADCY3,CBLN1,HSPG2,ITGA3,KCNJ10,LAMC1,LMNB1,OPHN1,OTOF,ROBO1,SLC18A2,SLC4A3,STUB1,YES1	14
Cell Morphology, Nervous System Development and Function, Tissue Morphology	abnormal morphology of dopaminergic neurons	4.96E-02			SLC18A2	1
Post-Translational Modification	aggregation of protein	4.96E-02			STUB1	1
Cellular Movement, Nervous System Development and Function	chemorepulsion of commissural neurons	4.96E-02			ROBO1	1
Auditory Disease, Cell Death and Survival, Cellular Compromise, Neurological Disease, Organismal Injury and Abnormalities, Tissue Morphology	degeneration of vestibular hair cells	4.96E-02			KCNJ10	1
Cellular Movement, Nervous System Development and Function	guidance of commissural axons	4.96E-02			ROBO1	1
Behavior	habituation	4.96E-02			GABRG2	1
Nervous System Development and Function	neurological function	4.96E-02			NGB	1
Cellular Function and Maintenance, Nervous System Development and Function	paired-pulse facilitation of hippocampal CA1 region	4.96E-02			OPHN1	1
Neurological Disease, Ophthalmic Disease, Organismal Injury and Abnormalities, Psychological Disorders	progressive supranuclear palsy	4.96E-02			STUB1	1
Cellular Assembly and Organization, Nervous System Development and Function, Tissue Morphology	quantity of axon terminals	4.96E-02			BMPR1A	1
Drug Metabolism, Lipid Metabolism, Small Molecule Biochemistry, Vitamin and Mineral Metabolism	synthesis of alitretinoin	4.96E-02			ALDH1A1	1
