# Supplementary material for: Label-Free Proteomic Analysis of Protein Changes in the Striatum during Chronic Ethanol Use and Early Withdrawal
Source: Front Behav Neurosci. 2016 Mar 11;10:46. doi: 10.3389/fnbeh.2016.00046 (PMC4786553; doi:10.3389/fnbeh.2016.00046)
Supplement: Supplementary file 8 [file DataSheet6.XLS]

## Sheet: molecules
© 2000-2015 QIAGEN. All rights reserved.
Symbol	Entrez Gene Name	GenPept/UniProt/Swiss-Prot Accession	Exp Fold Change	Exp p-value	Exp False Discovery Rate (q-value)	Networks	Location	Type(s)	Biomarker Application(s)	Drug(s)	Entrez Gene ID for Human	Entrez Gene ID for Mouse	Entrez Gene ID for Rat
ABCB11	ATP-binding cassette, sub-family B (MDR/TAP), member 11	J3QNY6	4.457	1.04E-11	9.00E-10	1	Plasma Membrane	transporter	unspecified application		8647	27413	83569
ABCC8	ATP-binding cassette, sub-family C (CFTR/MRP), member 8	B2RUS7	2.350	7.24E-06	2.12E-04	14	Plasma Membrane	transporter	efficacy	minoxidil, gliquidone, mitiglinide, tolbutamide, glipizide, glyburide, tolazamide, acetohexamide, chlorpropamide, gliclazide, glimepiride, repaglinide, nateglinide	6833	20927	25559
ABLIM2	actin binding LIM protein family, member 2	Q8BL65-2	-2.731	2.28E-08	1.16E-06		Cytoplasm	other			84448	231148	360958
ACHE	acetylcholinesterase (Yt blood group)	P21836	1.940	9.29E-03	8.58E-02		Plasma Membrane	enzyme		ZT-1, ladostigil, terestigmine, acetylcholinesterase inhibitor, donepezil/memantine, caracemide, atropine/edrophonium, BW 284 C 51, neostigmine, 2,3 butanedione monoxime, echothiophate, tacrine, edrophonium, isoflurophate, pyridostigmine, demecarium, ambenonium, donepezil, pralidoxime, rivastigmine, gallamine triethiodide, thiamine, huperzine A, physostigmine, galanthamine	43	11423	83817
ACKR1	atypical chemokine receptor 1 (Duffy blood group)	--				5	Plasma Membrane	G-protein coupled receptor			2532	13349	689105
ACTB	actin, beta	--				1	Cytoplasm	other			60	11461	81822
ADAM10	ADAM metallopeptidase domain 10	O35598	-1.029	9.25E-01	9.82E-01	6	Plasma Membrane	peptidase			102	11487	29650
ADCY3	adenylate cyclase 3	B8JK56	1.394	6.65E-06	1.96E-04	3	Plasma Membrane	enzyme			109	104111	64508
ADCY5	adenylate cyclase 5	P84309	1.781	6.59E-09	3.69E-07	5	Plasma Membrane	enzyme			111	224129	64532
ADD1	adducin 1 (alpha)	E9Q1K3	5.557	5.37E-96	3.55E-93	8	Cytoplasm	other			118	11518	24170
AIF1L	allograft inflammatory factor 1-like	A0A0A6YWH2	-2.112	8.75E-11	6.58E-09	7	Plasma Membrane	other			83543	108897	362107
AIFM1	apoptosis-inducing factor, mitochondrion-associated, 1	Q9Z0X1	1.191	4.08E-01	7.15E-01	6	Cytoplasm	enzyme			9131	26926	83533
AKAP5	A kinase (PRKA) anchor protein 5	D3YVF0	1.577	1.97E-03	2.58E-02		Plasma Membrane	other			9495	238276	171026
AKT1	v-akt murine thymoma viral oncogene homolog 1	P31750	1.340	8.57E-02	3.62E-01	8	Cytoplasm	kinase	diagnosis,efficacy,response to therapy	MK2206, GSK2141795, ipatasertib, LY2780301, ARQ 092, AZD5363, BAY1125976, MPT0E028, archexin, enzastaurin, perifosine	207	11651	24185
androstenedione	--	--					Other	chemical - endogenous mammalian	diagnosis,efficacy
ANG	angiogenin, ribonuclease, RNase A family, 5	--				7	Extracellular Space	enzyme	response to therapy		283	11727	305843|497229
AP2A2	adaptor-related protein complex 2, alpha 2 subunit	P17427	1.212	5.23E-02	2.72E-01	8	Cytoplasm	transporter			161	11772	81637
APOO	apolipoprotein O	Q9DCZ4-2	-1.605	2.04E-05	5.14E-04		Extracellular Space	other			79135	68316	363474
APP	amyloid beta (A4) precursor protein	P12023-2	1.207	1.23E-01	4.40E-01	1,2,4,5,6,7,8	Plasma Membrane	other	diagnosis,efficacy,unspecified application	bapineuzumab, florbetapir F18, florbetaben F	351	11820	54226
arachidonic acid	--	--				12	Other	chemical - endogenous mammalian	efficacy
ASCL1	achaete-scute family bHLH transcription factor 1	--					Nucleus	transcription regulator	unspecified application		429	17172	64186
ATM	ATM serine/threonine kinase	--				7	Nucleus	kinase	diagnosis		472	11920	300711
ATN1	atrophin 1	--					Nucleus	transcription regulator			1822	13498	100911672|29515
ATP	--	--				10	Other	chemical - endogenous mammalian
Atp5e	ATP synthase, H+ transporting, mitochondrial F1 complex, epsilon subunit	P56382	-2.265	2.65E-07	1.06E-05	6	Cytoplasm	transporter				67126	245958
ATXN1	ataxin 1	--				8	Nucleus	transcription regulator			6310	20238	25049
AVP	arginine vasopressin	P35455	-526440535.887	5.05E-06	1.57E-04	3	Extracellular Space	other	diagnosis,efficacy		551	11998	24221
BDNF	brain-derived neurotrophic factor	--				2,4,5,7	Extracellular Space	growth factor	efficacy,response to therapy		627	12064	24225
beta-estradiol	--	--				3,4	Other	chemical - endogenous mammalian	diagnosis,efficacy,safety
BID	BH3 interacting domain death agonist	P70444	-1.300	1.90E-06	6.56E-05	6	Cytoplasm	other			637	12122	64625
Ca2+	--	--				2,5,7,8	Other	chemical - endogenous mammalian	diagnosis,efficacy,safety
CACNA1B	calcium channel, voltage-dependent, N type, alpha 1B subunit	A2AIR7	1.074	3.96E-01	7.05E-01		Plasma Membrane	ion channel		ziconotide, clevidipine butyrate, levetiracetam, gabapentin, bepridil, agmatine	774	12287	257648
CAMK2A	calcium/calmodulin-dependent protein kinase II alpha	F8WIS9	-73122162827.637	0.00E00	0.00E00	6,8	Cytoplasm	kinase			815	12322	25400
CAMK2B	calcium/calmodulin-dependent protein kinase II beta	P28652	1.132	4.31E-01	7.32E-01	6	Cytoplasm	kinase			816	12323	24245
CASK	calcium/calmodulin-dependent serine protein kinase (MAGUK family)	O70589	1.318	7.82E-02	3.44E-01	4	Plasma Membrane	kinase			8573	12361	29647
CASKIN1	CASK interacting protein 1	Q6P9K8	1.423	2.12E-07	8.55E-06	4	Nucleus	transcription regulator			57524	268932	140722
CAV1	caveolin 1, caveolae protein, 22kDa	P49817	-1.106	5.15E-01	7.81E-01	3,7	Plasma Membrane	transmembrane receptor	diagnosis		857	12389	25404
CDK5	cyclin-dependent kinase 5	P49615	1.116	3.05E-01	6.58E-01	2,6,7	Nucleus	kinase		dinaciclib, alvocidib	1020	12568	140908
CDK5R1	cyclin-dependent kinase 5, regulatory subunit 1 (p35)	--				2,6	Nucleus	kinase			8851	12569	116671
CECR5	cat eye syndrome chromosome region, candidate 5	Q91WM2	-2.500	6.27E-11	4.84E-09	3	Cytoplasm	other			27440	214932	312680
CHAT	choline O-acetyltransferase	Q8BQV2	2.137	1.08E-05	2.94E-04	4	Nucleus	enzyme			1103	12647	290567
CHCHD3	coiled-coil-helix-coiled-coil-helix domain containing 3	Q9CRB9	-3.214	1.31E-05	3.48E-04		Cytoplasm	other			54927	66075	296966
CHMP1A	charged multivesicular body protein 1A	Q921W0	-2.301	3.68E-05	8.93E-04		Extracellular Space	peptidase			5119	234852	365024
CHRM4	cholinergic receptor, muscarinic 4	P32211	1.678	1.06E-05	2.92E-04	3	Plasma Membrane	G-protein coupled receptor		fesoterodine, ABT-089, protoveratrine derivative, aclidinium, dextromethorphan/quinidine, umeclidinium, umeclidinium/vilanterol, olodaterol/tiotropium, atropine/edrophonium, cyclopentolate/phenylephrine, albuterol/ipratropium, trihexyphenidyl, carbamylcholine, methacholine, diphenhydramine, doxepin, quinidine, procyclidine, trospium, homatropine, dicyclomine, methantheline, orphenadrine, fluoxeti…	1132	12672	25111
CISD1	CDGSH iron sulfur domain 1	Q91WS0	-1.319	1.64E-05	4.21E-04		Cytoplasm	other			55847	52637	294362
CLDN11	claudin 11	Q60771	-10.707	2.06E-222	3.06E-219	7	Plasma Membrane	other			5010	18417	84588
CLOCK	clock circadian regulator	--					Nucleus	transcription regulator			9575	12753	60447
CLPP	caseinolytic mitochondrial matrix peptidase proteolytic subunit	O88696	-2.120	4.95E-09	2.80E-07		Cytoplasm	peptidase			8192	53895	301117
CMTM5	CKLF-like MARVEL transmembrane domain containing 5	Q9D6G9-2	-1.293	2.31E-05	5.75E-04	7	Other	cytokine			116173	67272	290214
CNR1	cannabinoid receptor 1 (brain)	P47746	-1.231	5.23E-01	7.85E-01	3	Plasma Membrane	G-protein coupled receptor		trans-(±)-nabilone, SLV 319, rimonabant, BAY 38-7271, delta-8-tetrahydrocannabinol, delta-9-tetrahydrocannabinol	1268	12801	25248
COMT	catechol-O-methyltransferase	O88587-2	-1.086	6.76E-01	8.70E-01	3	Cytoplasm	enzyme	diagnosis,efficacy,prognosis,unspecified application	carbidopa/entacapone/levodopa, BIA-3-202, tolcapone, entacapone	1312	12846	24267
Cox6c	cytochrome c oxidase subunit VIc	Q9CPQ1	-1.346	4.30E-08	2.02E-06	6	Cytoplasm	enzyme				12864	54322
CPE	carboxypeptidase E	Q00493	1.027	8.56E-01	9.56E-01		Cytoplasm	peptidase			1363	12876	25669
CPLX1	complexin 1	P63040	-1.552	1.16E-01	4.28E-01		Plasma Membrane	transporter			10815	12889	64832
CPLX2	complexin 2	P84086	-1.120	6.75E-01	8.69E-01	6	Cytoplasm	other			10814	12890	116657
CPLX3	complexin 3	Q8R1B5	-7.681	7.82E-12	6.94E-10	6	Nucleus	transporter			594855	235415	501005
CREB1	cAMP responsive element binding protein 1	--				4,5	Nucleus	transcription regulator			1385	12912	81646
CREB3L1	cAMP responsive element binding protein 3-like 1	--					Nucleus	transcription regulator	unspecified application		90993	26427	362165
CRHBP	corticotropin releasing hormone binding protein	--					Extracellular Space	other			1393	12919	29625
CRHR1	corticotropin releasing hormone receptor 1	--					Plasma Membrane	G-protein coupled receptor	unspecified application	CRA0165, CRA1001, SSR125543A	1394	12921	58959
CRYAB	crystallin, alpha B	P23927	-1.385	2.58E-07	1.04E-05	3	Nucleus	other	diagnosis,disease progression,prognosis,unspecified application		1410	12955	25420
CYFIP1	cytoplasmic FMR1 interacting protein 1	Q7TMB8	1.055	7.31E-01	8.96E-01	5,8	Cytoplasm	other			23191	20430	308666
DBI	diazepam binding inhibitor (GABA receptor modulator, acyl-CoA binding protein)	P31786	-1.441	3.53E-05	8.63E-04	1	Cytoplasm	other			1622	13167	25045
DDX5	DEAD (Asp-Glu-Ala-Asp) box helicase 5	Q61656	-1.136	3.01E-01	6.53E-01	1	Nucleus	enzyme	unspecified application		1655	13207	287765
dehydroisoandrosterone	--	--				6,7	Other	chemical - endogenous mammalian	diagnosis,efficacy
DLG4	discs, large homolog 4 (Drosophila)	Q62108-3	-1.003	9.73E-01	9.97E-01	2,4,5,8	Plasma Membrane	kinase	unspecified application		1742	13385	29495
dopamine	--	--				3,4	Other	chemical - endogenous mammalian
DRD2	dopamine receptor D2	--				3	Plasma Membrane	G-protein coupled receptor	response to therapy	paliperidone, risperidone, buspirone, carbidopa/entacapone/levodopa, bifeprunox, iloperidone, blonanserin, asenapine, pardoprunox, ocaperidone, abaperidone, methotrimeprazine, fluspirilene, SLV-314, cariprazine, rotigotine, acetophenazine, sultopride, zuclopenthixol, thioproperazine, lurasidone, opipramol, paliperidone palmitate, brexpiprazole, pipothiazine, carbidopa/levodopa, chloropromazine, d…	1813	13489	24318
EEF2	eukaryotic translation elongation factor 2	P58252	1.043	6.37E-01	8.50E-01	8	Cytoplasm	translation regulator			1938	13629	29565
EGR2	early growth response 2	--				4	Nucleus	transcription regulator			1959	13654	114090
ELAVL1	ELAV like RNA binding protein 1	P70372	-1.775	1.09E-08	5.91E-07	5	Cytoplasm	other	efficacy		1994	15568	363854
ELAVL4	ELAV like neuron-specific RNA binding protein 4	A2A9S2	-1.896	3.19E-08	1.57E-06	8	Cytoplasm	other			1996	15572	432358
ELFN1	extracellular leucine-rich repeat and fibronectin type III domain containing 1	Q8C8T7	5.470	6.96E-16	9.85E-14		Plasma Membrane	other			392617	243312	288512
ERBB4	erb-b2 receptor tyrosine kinase 4	Q61527-3	1.519	6.65E-07	2.44E-05	5	Plasma Membrane	kinase	efficacy,safety	BMS-599626, afatinib, poziotinib	2066	13869	59323
ETNPPL	ethanolamine-phosphate phospho-lyase	E9PYH3	1.569	1.73E-05	4.42E-04	2	Other	enzyme			64850	71760	687071
FABP3	fatty acid binding protein 3, muscle and heart	P11404	-1.056	4.73E-01	7.60E-01	6	Cytoplasm	transporter	diagnosis,unspecified application		2170	14077	79131
FADS2	fatty acid desaturase 2	Q9Z0R9	-1.724	3.99E-05	9.57E-04	12	Plasma Membrane	enzyme			9415	56473	83512
FAM160A2	family with sequence similarity 160, member A2	Q3U2I3	1.413	1.05E-05	2.92E-04	3	Cytoplasm	other			84067	74349	293343
FAU	Finkel-Biskis-Reilly murine sarcoma virus (FBR-MuSV) ubiquitously expressed	P62862	-1.753	7.89E-10	4.99E-08		Cytoplasm	other			2197	14109	29752|100360647|687780
FGFR3	fibroblast growth factor receptor 3	Q61563	5.341	4.75E-09	2.74E-07	7	Plasma Membrane	kinase	prognosis	pazopanib, nintedanib, debio 1347, ARQ 087	2261	14184	84489
FMR1	fragile X mental retardation 1	--				6,8	Nucleus	other			2332	14265	24948
FOS	FBJ murine osteosarcoma viral oncogene homolog	--				3,4,5,6,7	Nucleus	transcription regulator	diagnosis,efficacy		2353	14281	314322
FXYD6	FXYD domain containing ion transport regulator 6	Q9D164-2	-1.471	6.58E-11	5.01E-09	2	Plasma Membrane	ion channel			53826	59095	63847
GAP43	growth associated protein 43	P06837	1.043	8.48E-01	9.53E-01	8	Plasma Membrane	other			2596	14432	29423
GDNF	glial cell derived neurotrophic factor	--				4	Extracellular Space	growth factor			2668	14573	25453
GDPD5	glycerophosphodiester phosphodiesterase domain containing 5	Q640M6	3.613	1.51E-05	3.91E-04		Other	enzyme			81544	233552	499211
GFAP	glial fibrillary acidic protein	P03995-2	-2.717	1.61E-01	5.04E-01	7	Cytoplasm	other	diagnosis		2670	14580	24387
GIT1	G protein-coupled receptor kinase interacting ArfGAP 1	Q68FF6	1.446	2.49E-06	8.35E-05	3	Nucleus	kinase			28964	216963	83709
GNG2	guanine nucleotide binding protein (G protein), gamma 2	P63213	-1.990	8.39E-06	2.40E-04	6	Plasma Membrane	enzyme			54331	14702	80850
GNG5	guanine nucleotide binding protein (G protein), gamma 5	Q80SZ7	-1.856	2.07E-05	5.20E-04		Plasma Membrane	other			2787	100043507|14707	79218
GNRH1	gonadotropin-releasing hormone 1 (luteinizing-releasing hormone)	--					Extracellular Space	other		GNRH1, flutamide/goserelin, anastrozole/goserelin, goserelin/tamoxifen, triptorelin, goserelin	2796	14714	25194
GPX3	glutathione peroxidase 3	D3Z2Y7	-1.952	5.50E-08	2.53E-06	2	Extracellular Space	enzyme	unspecified application		2878	14778	64317
GRIA1	glutamate receptor, ionotropic, AMPA 1	Q7TNB5	-1.012	9.30E-01	9.82E-01	2,3,5,6,7,8	Plasma Membrane	ion channel		talampanel, farampator, LY451395, tezampanel, perampanel, sevoflurane, isoflurane, desflurane, methoxyflurane, enflurane	2890	14799	50592
GRIA2	glutamate receptor, ionotropic, AMPA 2	P23819-4	-1.018	8.98E-01	9.72E-01	8	Plasma Membrane	ion channel		talampanel, farampator, LY451395, tezampanel	2891	14800	29627
GRIA3	glutamate receptor, ionotropic, AMPA 3	Q9Z2W9	-1.369	1.57E-01	4.99E-01	8	Plasma Membrane	ion channel		talampanel, farampator, LY451395, tezampanel	2892	53623	29628
GRIK5	glutamate receptor, ionotropic, kainate 5	--				8	Plasma Membrane	ion channel			2901	14809	24407
GRIN1	glutamate receptor, ionotropic, N-methyl D-aspartate 1	P35438-2	-2.066	2.27E-04	4.38E-03	3,4,5,6,7,8	Plasma Membrane	ion channel	unspecified application	dextromethorphan/morphine, neramexane, bicifadine, delucemine, nebostinel, besonprodil, UK-240455, dextromethorphan/quinidine, ketamine, felbamate, ifenprodil, memantine, orphenadrine, cycloserine, aspirin/caffeine/orphenadrine, N-(2-indanyl)glycinamide, dextromethorphan, acamprosate, brompheniramine/dextromethorphan/pseudoephedrine, chlorpheniramine/dextromethorphan/phenylephrine, carbinoxamine/…	2902	14810	24408
GRIN2A	glutamate receptor, ionotropic, N-methyl D-aspartate 2A	--				2,3,6,7	Plasma Membrane	ion channel	unspecified application	dextromethorphan/morphine, neramexane, bicifadine, delucemine, nebostinel, besonprodil, UK-240455, tenocyclidine, dextromethorphan/quinidine, donepezil/memantine, ketamine, felbamate, memantine, orphenadrine, cycloserine, N-(2-indanyl)glycinamide, dextromethorphan, brompheniramine/dextromethorphan/pseudoephedrine, chlorpheniramine/dextromethorphan/phenylephrine, carbinoxamine/dextromethorphan/pse…	2903	14811	24409
GRIN2B	glutamate receptor, ionotropic, N-methyl D-aspartate 2B	G3X9V4	-1.430	4.41E-01	7.39E-01	3,6,7	Plasma Membrane	ion channel	diagnosis,unspecified application	dextromethorphan/morphine, neramexane, bicifadine, delucemine, nebostinel, besonprodil, UK-240455, tenocyclidine, dextromethorphan/quinidine, donepezil/memantine, ketamine, felbamate, ifenprodil, memantine, orphenadrine, cycloserine, N-(2-indanyl)glycinamide, dextromethorphan, brompheniramine/dextromethorphan/pseudoephedrine, chlorpheniramine/dextromethorphan/phenylephrine, carbinoxamine/dextrome…	2904	14812	24410
GRM1	glutamate receptor, metabotropic 1	P97772	1.482	9.81E-02	3.92E-01	2,3,8	Plasma Membrane	G-protein coupled receptor	efficacy	fasoracetam	2911	14816	24414
GRM2	glutamate receptor, metabotropic 2	Q14BI2	1.372	1.11E-03	1.62E-02	2	Plasma Membrane	G-protein coupled receptor		talaglumetad, fasoracetam	2912	108068	24415
GRM3	glutamate receptor, metabotropic 3	Q9QYS2	1.990	4.22E-07	1.63E-05	2	Plasma Membrane	G-protein coupled receptor		fasoracetam	2913	108069	24416
GUCY1A3	guanylate cyclase 1, soluble, alpha 3	Q9ERL9	1.897	2.43E-09	1.46E-07	4	Cytoplasm	enzyme		nitroglycerin, isosorbide-5-mononitrate, isosorbide dinitrate, nitroprusside	2982	60596	497757
GYG1	glycogenin 1	Q9R062	2.866	5.74E-12	5.17E-10		Cytoplasm	enzyme			2992	27357	81675
H2AFV	H2A histone family, member V	Q3THW5	-5.900	1.59E-08	8.28E-07	6	Nucleus	other			94239	77605	685909
H3F3A/H3F3B	H3 histone, family 3A	E0CZ27	-11.249	3.71E-128	2.75E-125		Nucleus	other	diagnosis		3020|3021	15078|15081	117056|100361558
HARS2	histidyl-tRNA synthetase 2, mitochondrial	Q99KK9	1.324	3.93E-05	9.46E-04		Cytoplasm	enzyme			23438	70791	307491
HDAC4	histone deacetylase 4	Q6NZM9	-1.036	8.06E-01	9.36E-01	5	Nucleus	transcription regulator		tributyrin, belinostat, pyroxamide, romidepsin	9759	208727	363287
HIST1H1D	histone cluster 1, H1d	P43277	-6.015	6.51E-22	1.49E-19		Nucleus	other			3007	14957
HK1	hexokinase 1	P17710-3	-1.622	3.13E-06	1.03E-04	7	Cytoplasm	kinase			3098	15275	25058
HOMER1	homer scaffolding protein 1	Q9Z2Y3	1.074	7.21E-01	8.89E-01	4	Plasma Membrane	other			9456	26556	29546
HPGDS	hematopoietic prostaglandin D synthase	Q9JHF7	1.324	1.76E-06	6.10E-05	7	Cytoplasm	enzyme			27306	54486	58962
HRAS	Harvey rat sarcoma viral oncogene homolog	Q61411	-1.104	3.51E-01	6.80E-01	3	Plasma Membrane	enzyme	prognosis,safety		3265	15461	293621
HTT	huntingtin	G3X9H5	1.037	8.20E-01	9.42E-01	2,4,5,8	Cytoplasm	transcription regulator	unspecified application		3064	15194	29424
IL1B	interleukin 1, beta	--				7	Extracellular Space	cytokine	diagnosis,efficacy,prognosis	canakinumab, gevokizumab, canakinumab/INS, gallium nitrate	3553	16176	24494
IMMT	inner membrane protein, mitochondrial	Q8CAQ8-2	-1.565	7.85E-06	2.28E-04		Cytoplasm	other			10989	76614	312444
Ins1	insulin I	--				7	Extracellular Space	other				16333	24505
ITGB1	integrin, beta 1 (fibronectin receptor, beta polypeptide, antigen CD29 includes MDF2, MSK12)	P09055	1.035	7.87E-01	9.25E-01	7	Plasma Membrane	transmembrane receptor	disease progression,prognosis		3688	16412	24511
ITIH1	inter-alpha-trypsin inhibitor heavy chain 1	Q61702	-1.639	1.04E-03	1.54E-02	11	Extracellular Space	other			3697	16424	306251
ITIH2	inter-alpha-trypsin inhibitor heavy chain 2	Q61703	-3.629	9.63E-08	4.30E-06	11	Extracellular Space	other			3698	16425
K+	--	--				3,5,8	Other	chemical - endogenous mammalian	diagnosis,efficacy,safety
KCNIP3	Kv channel interacting protein 3, calsenilin	--					Nucleus	transcription regulator			30818	56461	65199
KCNQ3	potassium channel, voltage gated KQT-like subfamily Q, member 3	Q8K3F6	3.201	1.08E-08	5.88E-07	7	Plasma Membrane	ion channel		ezogabine	3786	110862	29682
L-dopa	--	--				2,4,5	Other	chemical - endogenous mammalian
L-glutamic acid	--	--				2,3,5,7,8	Other	chemical - endogenous mammalian	efficacy,response to therapy
LAMP5	lysosomal-associated membrane protein family, member 5	Q9D387	3.531	1.70E-10	1.25E-08	5	Cytoplasm	other			24141	76161	362220
LAMTOR5	late endosomal/lysosomal adaptor, MAPK and MTOR activator 5	Q9D1L9	-1.847	4.00E-10	2.70E-08	3	Cytoplasm	other			10542	68576	295357
LHX6	LIM homeobox 6	--					Nucleus	transcription regulator			26468	16874	311901
LMNA	lamin A/C	P48678-2	-1.942	4.55E-04	7.66E-03	9	Nucleus	other			4000	16905	60374
LMNB1	lamin B1	P14733	-1.790	1.23E-13	1.33E-11	13	Nucleus	other			4001	16906	116685
LPPR3	lipid phosphate phosphatase-related protein type 3	Q7TPB0	1.525	9.50E-08	4.28E-06		Other	phosphatase			79948	216152	314614
LRRC1	leucine rich repeat containing 1	Q80VQ1	1.415	1.35E-08	7.08E-07	4	Cytoplasm	other			55227	214345	367113
LRRK2	leucine-rich repeat kinase 2	Q5S006	1.272	1.73E-01	5.21E-01	13	Cytoplasm	kinase	diagnosis		120892	66725	300160
LZTS3	leucine zipper, putative tumor suppressor family member 3	A2AHG0	-1.335	5.10E-01	7.78E-01	4	Cytoplasm	other			9762	241638	280670
MAP4	microtubule-associated protein 4	A0A0G2JDN7	1.510	1.91E-09	1.17E-07	1	Cytoplasm	other	efficacy		4134	17758	367171
MAP2K4	mitogen-activated protein kinase kinase 4	P47809	1.049	7.25E-01	8.92E-01	2,7	Cytoplasm	kinase			6416	26398	287398
MAP3K7	mitogen-activated protein kinase kinase kinase 7	--				7	Cytoplasm	kinase			6885		313121
MAPK1	mitogen-activated protein kinase 1	P63085	-1.034	7.69E-01	9.16E-01	5	Cytoplasm	kinase	efficacy	MAP kinase1 inhibitor, binimetinib, BVD-523, LY-3007113, pexmetinib	5594	26413	116590
MAPK8	mitogen-activated protein kinase 8	Q91Y86	1.223	3.20E-01	6.61E-01	2	Cytoplasm	kinase		aplidine	5599	26419	116554
MAPK10	mitogen-activated protein kinase 10	Q80W82	1.381	2.80E-02	1.85E-01	2	Cytoplasm	kinase			5602	26414	25272
MAPT	microtubule-associated protein tau	A0A0A0MQC7	1.081	4.56E-01	7.50E-01	4	Plasma Membrane	other	diagnosis,efficacy,unspecified application		4137	17762	29477
MCTP1	multiple C2 domains, transmembrane 1	E9PW38	3.049	3.51E-08	1.70E-06	5	Other	other			79772	78771	309928
MCU	mitochondrial calcium uniporter	Q3UMR5	-2.101	3.21E-09	1.89E-07		Cytoplasm	ion channel			90550	215999	294560
MECP2	methyl CpG binding protein 2	--				5,6	Nucleus	transcription regulator	unspecified application		4204	17257	29386
MKNK1	MAP kinase interacting serine/threonine kinase 1	--				2,5,6	Cytoplasm	kinase			8569	17346	500526
MMP9	matrix metallopeptidase 9	--				3,6,7	Extracellular Space	peptidase	diagnosis,disease progression,efficacy,prognosis,unspecified application	MMP2 MMP9 inhibitor, GS-5745	4318	17395	81687
MOBP	myelin-associated oligodendrocyte basic protein	Q9D2P8	-14.701	2.89E-22	6.86E-20	2	Cytoplasm	other			4336	17433	25037
MOG	myelin oligodendrocyte glycoprotein	Q61885	-3.475	3.32E-16	4.81E-14	5	Extracellular Space	other			4340	17441	24558
MT-CO1	cytochrome c oxidase subunit I	P00397	-1.879	1.59E-09	9.87E-08	6	Cytoplasm	enzyme			4512	17708	26195
MT-CO2	cytochrome c oxidase subunit II	P00405	-1.822	0.00E00	0.00E00	7	Cytoplasm	enzyme			4513	17709	26198
MTCH2	mitochondrial carrier 2	Q791V5	-1.715	2.14E-06	7.28E-05		Cytoplasm	other			23788	56428	295922
MTOR	mechanistic target of rapamycin (serine/threonine kinase)	Q9JLN9	-1.048	7.25E-01	8.92E-01	6	Nucleus	kinase	efficacy	ridaforolimus, OSI-027, methotrexate/sirolimus/tacrolimus, dactolisib, AZD2014, apitolisib, PKI-179, everolimus/exemestane, lenalidomide/temsirolimus, cc-223, PF-05212384, imatinib/sirolimus, cyclophosphamide/sirolimus, P7170, cyclosporine A/sirolimus/tacrolimus, everolimus/pasireotide, mTOR inhibitor, PWT33597, PQR309, VS-5584, sirolimus, temsirolimus, tacrolimus, everolimus, pimecrolimus	2475	56717	56718
MYC	v-myc avian myelocytomatosis viral oncogene homolog	--				1	Nucleus	transcription regulator	diagnosis,efficacy,prognosis,response to therapy,unspecified application		4609	17869	24577
MYL6B	myosin, light chain 6B, alkali, smooth muscle and non-muscle	Q8CI43	-2.053	3.83E-07	1.50E-05		Cytoplasm	other			140465	216459	317454
MYO5A	myosin VA (heavy chain 12, myoxin)	D3YZ62	-1.745	5.45E-06	1.66E-04	5	Cytoplasm	enzyme			4644	17918	25017
NAP1L5	nucleosome assembly protein 1-like 5	Q9JJF0	-1.891	8.09E-06	2.32E-04	5	Other	other			266812	58243	688843
NCS1	neuronal calcium sensor 1	Q8BNY6	1.327	4.32E-08	2.02E-06	3	Cytoplasm	other			23413	14299	65153
NDUFA1	NADH dehydrogenase (ubiquinone) 1 alpha subcomplex, 1, 7.5kDa	O35683	-1.730	3.84E-37	1.43E-34		Cytoplasm	enzyme			4694	54405	363441
NDUFA2	NADH dehydrogenase (ubiquinone) 1 alpha subcomplex, 2, 8kDa	Q9CQ75	-1.514	3.31E-23	8.56E-21		Cytoplasm	enzyme			4695	17991	291660
NDUFA5	NADH dehydrogenase (ubiquinone) 1 alpha subcomplex, 5	Q9CPP6	-1.595	2.98E-34	1.04E-31	4	Cytoplasm	enzyme			4698	68202	25488
NDUFA7	NADH dehydrogenase (ubiquinone) 1 alpha subcomplex, 7, 14.5kDa	Q9Z1P6	-1.576	6.04E-11	4.72E-09		Cytoplasm	enzyme			4701	66416	299643
NDUFA8	NADH dehydrogenase (ubiquinone) 1 alpha subcomplex, 8, 19kDa	Q9DCJ5	-1.781	4.34E-27	1.36E-24	4	Cytoplasm	enzyme			4702	68375	296658
NDUFA12	NADH dehydrogenase (ubiquinone) 1 alpha subcomplex, 12	Q7TMF3	-1.586	1.06E-08	5.86E-07		Cytoplasm	enzyme			55967	66414	299739
NDUFA13	NADH dehydrogenase (ubiquinone) 1 alpha subcomplex, 13	Q9ERS2	-1.581	3.03E-06	1.00E-04		Cytoplasm	enzyme			51079	67184	100911483|314759
NDUFB3	NADH dehydrogenase (ubiquinone) 1 beta subcomplex, 3, 12kDa	Q9CQZ6	-1.566	2.37E-08	1.19E-06		Cytoplasm	enzyme			4709	66495	301427
NDUFB4	NADH dehydrogenase (ubiquinone) 1 beta subcomplex, 4, 15kDa	Q9CQC7	-1.560	3.30E-39	1.31E-36		Cytoplasm	transporter			4710	100041273|100042503|68194	501886|499131|688963|691675|100361934|288088
NDUFB5	NADH dehydrogenase (ubiquinone) 1 beta subcomplex, 5, 16kDa	Q9CQH3	-1.507	1.26E-08	6.74E-07		Cytoplasm	enzyme			4711	66046	294964
NDUFB7	NADH dehydrogenase (ubiquinone) 1 beta subcomplex, 7, 18kDa	Q9CR61	-2.151	1.25E-05	3.34E-04		Cytoplasm	enzyme			4713	66916	361385
NDUFB8	NADH dehydrogenase (ubiquinone) 1 beta subcomplex, 8, 19kDa	Q9D6J5	-1.674	1.97E-13	2.08E-11		Cytoplasm	enzyme			4714	67264	293991
NDUFB9	NADH dehydrogenase (ubiquinone) 1 beta subcomplex, 9, 22kDa	Q9CQJ8	-1.850	2.68E-10	1.90E-08		Cytoplasm	enzyme			4715	66218	299954
NDUFB10	NADH dehydrogenase (ubiquinone) 1 beta subcomplex, 10, 22kDa	Q9DCS9	-1.552	3.68E-10	2.51E-08		Cytoplasm	enzyme			4716	68342	681418
NDUFS3	NADH dehydrogenase (ubiquinone) Fe-S protein 3, 30kDa (NADH-coenzyme Q reductase)	Q9DCT2	-2.526	5.77E-07	2.16E-05	2	Cytoplasm	enzyme			4722	68349	295923
NDUFS7	NADH dehydrogenase (ubiquinone) Fe-S protein 7, 20kDa (NADH-coenzyme Q reductase)	Q9DC70	-1.531	1.29E-08	6.83E-07	6	Cytoplasm	enzyme			374291	75406	362837
NDUFS8	NADH dehydrogenase (ubiquinone) Fe-S protein 8, 23kDa (NADH-coenzyme Q reductase)	Q8K3J1	-1.532	8.86E-15	1.15E-12		Cytoplasm	enzyme			4728	225887	293652
NDUFV2	NADH dehydrogenase (ubiquinone) flavoprotein 2, 24kDa	Q9D6J6	-1.462	8.87E-06	2.50E-04		Cytoplasm	enzyme			4729	72900	81728
NECAB2	N-terminal EF-hand calcium binding protein 2	Q91ZP9	1.299	1.07E-05	2.93E-04	3	Cytoplasm	other			54550	117148	170928
NEFL	neurofilament, light polypeptide	P08551	-1.202	8.78E-02	3.66E-01		Cytoplasm	other			4747	18039	83613
Nefm	neurofilament, medium polypeptide	P08553	-1.275	3.59E-07	1.42E-05	2	Plasma Membrane	other				18040	24588
NGB	neuroglobin	Q9ER97	-4.059	7.75E-16	1.05E-13	6	Cytoplasm	transporter			58157	64242	85382
NGF	nerve growth factor (beta polypeptide)	--				4	Extracellular Space	growth factor			4803	18049	310738
NINJ1	ninjurin 1	D6RFN5	1.384	3.84E-08	1.84E-06	5	Plasma Membrane	other	disease progression		4814	18081	25338
NKX2-3	NK2 homeobox 3	--					Nucleus	transcription regulator			159296	18089	309389
NME3	NME/NM23 nucleoside diphosphate kinase 3	Q9WV85	-1.647	4.23E-08	2.01E-06		Cytoplasm	kinase			4832	79059	85269
NOS1	nitric oxide synthase 1 (neuronal)	S4R255	1.224	1.25E-01	4.43E-01	3,6	Cytoplasm	enzyme	unspecified application	GW 273629, targinine	4842	18125	24598
NPY	neuropeptide Y	--				5,8	Extracellular Space	other	efficacy		4852	109648	24604|100912228
NR1H4	nuclear receptor subfamily 1, group H, member 4	--				1	Nucleus	ligand-dependent nuclear receptor	diagnosis		9971	20186	60351
Nrgn	neurogranin	P60761	1.286	7.30E-01	8.95E-01	6	Plasma Membrane	other				64011	64356
NRIP2	nuclear receptor interacting protein 2	Q9JHR9-2	-1.384	2.26E-24	6.40E-22		Nucleus	transcription regulator			83714	60345	689619
NRP1	neuropilin 1	P97333	-1.637	8.15E-03	7.75E-02	3	Plasma Membrane	transmembrane receptor	diagnosis,efficacy		8829	18186	246331
NUP88	nucleoporin 88kDa	--				15	Nucleus	transporter			4927	19069	113929
NUP214	nucleoporin 214kDa	Q80U93	1.513	1.23E-05	3.32E-04	15	Nucleus	transporter			8021	227720	296634
OMG	oligodendrocyte myelin glycoprotein	Q63912	1.573	1.60E-07	6.81E-06	5	Plasma Membrane	G-protein coupled receptor			4974	18377	450224
OSBPL8	oxysterol binding protein-like 8	B9EJ86	1.579	1.49E-05	3.88E-04	2	Plasma Membrane	other			114882	237542	314824
OTOF	otoferlin	D3YXV0	2.268	9.99E-07	3.56E-05	8	Plasma Membrane	other			9381	83762	84573
PAFAH1B1	platelet-activating factor acetylhydrolase 1b, regulatory subunit 1 (45kDa)	P63005	-1.014	9.43E-01	9.86E-01	5	Cytoplasm	enzyme			5048	18472	83572
PAFAH1B3	platelet-activating factor acetylhydrolase 1b, catalytic subunit 3 (29kDa)	Q61205	-2.540	1.54E-07	6.57E-06	5	Cytoplasm	enzyme			5050	18476	114113
PAIP2	poly(A) binding protein interacting protein 2	Q9D6V8	-1.859	2.22E-03	2.82E-02		Cytoplasm	translation regulator			51247	67869	361309
PAX6	paired box 6	--				3	Nucleus	transcription regulator			5080	18508	25509
PCDH10	protocadherin 10	Q925I8	1.746	4.43E-21	9.09E-19	8	Plasma Membrane	other			57575	18526
PDE10A	phosphodiesterase 10A	Q8CA95-3	1.661	8.40E-12	7.34E-10	2	Cytoplasm	enzyme		aspirin/dipyridamole/telmisartan, triflusal, dipyridamole, aspirin/dipyridamole	10846	23984	63885
PDE2A	phosphodiesterase 2A, cGMP-stimulated	Q5PR72	1.923	6.74E-08	3.06E-06	8	Cytoplasm	enzyme			5138	207728	81743
PDE4DIP	phosphodiesterase 4D interacting protein	Q80YT7	2.791	5.82E-06	1.76E-04	4	Cytoplasm	enzyme	unspecified application		9659	83679	64183
PDYN	prodynorphin	O35852	1.784	1.20E-13	1.32E-11	3	Extracellular Space	transporter	unspecified application		5173	18610	29190
PLLP	plasmolipin	Q9DCU2	-2.156	5.36E-07	2.03E-05		Plasma Membrane	transporter			51090	67801	64364
POMC	proopiomelanocortin	--				5	Extracellular Space	other	diagnosis,efficacy,unspecified application		5443	18976	24664
PPIB	peptidylprolyl isomerase B (cyclophilin B)	P24369	-1.907	1.26E-11	1.07E-09	6	Cytoplasm	enzyme			5479	19035	64367
PPM1L	protein phosphatase, Mg2+/Mn2+ dependent, 1L	Q8BHN0	-34788667566.644	0.00E00	0.00E00	4	Cytoplasm	phosphatase			151742	242083	310506
PPP1R14C	protein phosphatase 1, regulatory (inhibitor) subunit 14C	Q8R4S0	-1.484	1.99E-18	3.48E-16		Cytoplasm	other			81706	76142	171010
PPP1R9B	protein phosphatase 1, regulatory subunit 9B	Q6R891	-1.675	9.01E-06	2.53E-04	3	Cytoplasm	enzyme			84687	217124	84686
PRKCG	protein kinase C, gamma	P63318	1.244	1.63E-01	5.08E-01	8	Cytoplasm	kinase		ingenol mebutate	5582	18752	24681
PSEN1	presenilin 1	P49769	1.021	9.48E-01	9.88E-01	4	Plasma Membrane	peptidase	diagnosis,unspecified application	tarenflurbil	5663	19164	29192
PTGFRN	prostaglandin F2 receptor inhibitor	Q9WV91	1.824	1.51E-06	5.31E-05	5	Plasma Membrane	other			5738	19221	29602
PTHLH	parathyroid hormone-like hormone	--					Extracellular Space	other			5744	19227	24695
PTN	pleiotrophin	P63089	-3.414	3.24E-06	1.05E-04	3	Extracellular Space	growth factor			5764	19242	24924
RAB33A	RAB33A, member RAS oncogene family	P97950	1.291	1.20E-05	3.26E-04		Cytoplasm	enzyme			9363	19337	317580
RAN	RAN, member RAS oncogene family	P62827	-1.180	5.44E-01	7.99E-01	15	Nucleus	enzyme			5901	19384	84509
RAP1GAP	RAP1 GTPase activating protein	A2ALS5	1.623	6.66E-07	2.44E-05	2	Cytoplasm	other			5909	110351	313644
RAPGEF3	Rap guanine nucleotide exchange factor (GEF) 3	--				14	Nucleus	other			10411	223864	59326
RAPGEF4	Rap guanine nucleotide exchange factor (GEF) 4	Q9EQZ6-3	1.041	9.68E-01	9.94E-01	14	Cytoplasm	other			11069	56508	252857
RARA	retinoic acid receptor, alpha	--				1	Nucleus	ligand-dependent nuclear receptor	diagnosis	etretinate, daunorubicin/tretinoin, idarubicin/tretinoin, doxorubicin/tretinoin, adapalene, arsenic trioxide, isotretinoin, tazarotene, acitretin, tretinoin, tamibarotene, alitretinoin	5914	19401	24705
RBP1	retinol binding protein 1, cellular	Q00915	1.247	8.98E-02	3.72E-01	1	Extracellular Space	transporter	diagnosis		5947	19659	25056
REST	RE1-silencing transcription factor	--					Nucleus	transcription regulator			5978	19712	83618
RNF41	ring finger protein 41, E3 ubiquitin protein ligase	--					Cytoplasm	enzyme			10193	67588	362814
ROBO1	roundabout guidance receptor 1	G5E843	1.623	1.50E-14	1.89E-12	4	Plasma Membrane	transmembrane receptor			6091	19876	58946
RPA1	replication protein A1, 70kDa	Q8VEE4	1.469	4.97E-06	1.56E-04	7	Nucleus	other			6117	68275	287524
RPE	ribulose-5-phosphate-3-epimerase	Q8VEE0	-1.357	3.04E-06	1.00E-04		Cytoplasm	enzyme			6120	66646	501157
RPL12	ribosomal protein L12	P35979	-1.684	3.46E-06	1.11E-04	6	Nucleus	other			6136	269261	102555453|499782
RPL17	ribosomal protein L17	Q6ZWZ7	-1.693	2.48E-06	8.35E-05		Cytoplasm	other			6139	102632403|319195	291434
RPL18	ribosomal protein L18	P35980	-1.858	2.02E-08	1.04E-06		Cytoplasm	other			6141	19899	81766
RPL19	ribosomal protein L19	A2A547	-1.777	5.98E-06	1.79E-04	1	Cytoplasm	other			6143	19921	81767
RPL21	ribosomal protein L21	Q9CQM8	-1.985	4.12E-19	7.42E-17	1	Cytoplasm	other			6144	19933	79449
RPL22	ribosomal protein L22	P67984	-1.794	1.08E-07	4.73E-06	1	Nucleus	other			6146	19934	81768
RPL23	ribosomal protein L23	P62830	-2.112	1.55E-14	1.92E-12	1	Cytoplasm	other			9349	65019	29282
RPL26	ribosomal protein L26	P61255	-1.774	4.95E-10	3.27E-08	1	Cytoplasm	other			6154	19941	287417
RPL27	ribosomal protein L27	P61358	-1.859	8.73E-17	1.33E-14	1	Cytoplasm	other			6155	19942	64306
RPL35	ribosomal protein L35	Q6ZWV7	-1.580	5.88E-28	1.94E-25	1	Cytoplasm	other			11224	66489	296709
RPL38	ribosomal protein L38	Q9JJI8	-1.895	2.34E-10	1.68E-08		Cytoplasm	other			6169	67671
RPL13A	ribosomal protein L13a	P19253	-2.548	2.82E-21	5.99E-19		Cytoplasm	other			23521	22121	317646
RPL27A	ribosomal protein L27a	P14115	-1.526	2.88E-12	2.72E-10		Cytoplasm	other			6157	26451	293418
RPL37A	ribosomal protein L37a	P61514	-2.040	6.46E-14	7.52E-12	5	Cytoplasm	other			6168	19981	100361520
RPL7A	ribosomal protein L7a	P12970	-1.928	1.46E-05	3.84E-04	1	Cytoplasm	other			6130	27176	296596
RPLP0	ribosomal protein, large, P0	P14869	-1.908	1.50E-17	2.41E-15	7	Cytoplasm	other			6175	11837	64205
RPS15	ribosomal protein S15	P62843	-1.686	1.70E-05	4.35E-04		Cytoplasm	other			6209	20054	29285
RPS16	ribosomal protein S16	P14131	-1.877	7.16E-16	9.90E-14	1	Cytoplasm	other			6217	20055	140655
RPS19	ribosomal protein S19	Q9CZX8	-1.426	9.51E-04	1.44E-02	1	Cytoplasm	other			6223	20085	29287|100910336
RPS26	ribosomal protein S26	P62855	-1.258	4.13E-05	9.85E-04	1	Cytoplasm	other			6231	27370	27139|100360508
RPS28	ribosomal protein S28	G3UYV7	-2.039	1.96E-07	8.00E-06		Cytoplasm	other			6234	54127	691531
RPS15A	ribosomal protein S15a	P62245	-1.568	4.78E-10	3.19E-08	1	Cytoplasm	other			6210	267019	117053
RTN4	reticulon 4	Q99P72	1.242	2.12E-02	1.53E-01	8	Cytoplasm	other	diagnosis		57142	68585	83765
S100B	S100 calcium binding protein B	P50114	-1.568	7.28E-20	1.40E-17	7	Cytoplasm	other	diagnosis,efficacy		6285	20203	25742
SDPR	serum deprivation response	Q63918	1.815	2.55E-08	1.27E-06	7	Plasma Membrane	other			8436	20324	316384
SHANK3	SH3 and multiple ankyrin repeat domains 3	A0A0A0MQD5	-2.217	6.03E-06	1.79E-04	4	Plasma Membrane	other			85358	58234	59312
SLC18A3	solute carrier family 18 (vesicular acetylcholine transporter), member 3	Q3TYJ1	-1.182	6.65E-01	8.63E-01	4	Plasma Membrane	transporter			6572	20508	60422
SLC1A3	solute carrier family 1 (glial high affinity glutamate transporter), member 3	P56564	1.227	2.75E-01	6.38E-01	2	Plasma Membrane	transporter		riluzole	6507	20512	29483
SLC25A27	solute carrier family 25, member 27	Q9D6D0	-1.802	2.80E-06	9.34E-05	10	Cytoplasm	transporter			9481	74011	85262
SLC2A13	solute carrier family 2 (facilitated glucose transporter), member 13	Q3UHK1	1.975	3.87E-07	1.50E-05	4	Plasma Membrane	transporter			114134	239606	171147
SLC35D3	solute carrier family 35, member D3	Q8BGF8	7.436	3.81E-19	7.08E-17	3	Other	other			340146	76157	308717
SNAP25	synaptosomal-associated protein, 25kDa	P60879-2	-1.318	1.57E-02	1.26E-01	6	Plasma Membrane	transporter	unspecified application	botulinum toxin type A	6616	20614	25012
SP1	Sp1 transcription factor	--				1	Nucleus	transcription regulator			6667	20683	24790
SPTBN2	spectrin, beta, non-erythrocytic 2	Q68FG2	-1.716	5.06E-06	1.57E-04	2	Cytoplasm	other			6712	20743	29211
SRC	SRC proto-oncogene, non-receptor tyrosine kinase	P05480	1.366	4.95E-02	2.64E-01	3	Cytoplasm	kinase	diagnosis,disease progression,efficacy,prognosis,response to therapy	dasatinib, AZM-475271, saracatinib, nintedanib, KX-01, pexmetinib, AZD0424, bosutinib	6714	20779	83805
STX3	syntaxin 3	Q64704-2	-4.468	1.72E-14	2.09E-12	2	Plasma Membrane	transporter			6809	20908	81802
STX1A	syntaxin 1A (brain)	O35526	1.001	9.93E-01	9.99E-01	2	Cytoplasm	transporter			6804	20907	116470
STX1B	syntaxin 1B	P61264	-1.183	3.24E-01	6.64E-01	8	Plasma Membrane	other			112755	56216	24923
STXBP1	syntaxin binding protein 1	O08599	1.214	2.87E-01	6.45E-01	2	Cytoplasm	transporter			6812	20910	25558
STXBP3	syntaxin binding protein 3	Q60770	-1.340	1.22E-05	3.29E-04	7	Plasma Membrane	transporter			6814	20912	114095
SUB1	SUB1 homolog (S. cerevisiae)	P11031	-1.780	7.50E-07	2.69E-05	4	Nucleus	transcription regulator			10923	20024	192269
SV2C	synaptic vesicle glycoprotein 2C	Q69ZS6	1.873	1.05E-08	5.83E-07	5	Plasma Membrane	other			22987	75209	29643
SYN1	synapsin I	O88935-1	1.466	2.23E-01	5.87E-01	8	Plasma Membrane	transporter			6853	20964	24949
SYT12	synaptotagmin XII	Q920N7	1.746	5.10E-06	1.57E-04	4	Plasma Membrane	transporter			91683	171180	191595
TAC1	tachykinin, precursor 1	--				8	Extracellular Space	other	diagnosis		6863	21333	24806
TAGLN3	transgelin 3	Q9R1Q8	-1.482	1.25E-05	3.34E-04	2	Extracellular Space	other			29114	56370	63837
TAOK1	TAO kinase 1	Q5F2E8	-1.948	1.14E-02	1.01E-01	4	Cytoplasm	kinase			57551	216965	286993
TGFB1	transforming growth factor, beta 1	--				7	Extracellular Space	growth factor	diagnosis,efficacy,prognosis,safety,unspecified application	dalantercept	7040	21803	59086
Tgoln1	trans-golgi network protein	Q62313	-1.061	8.39E-01	9.49E-01	4	Cytoplasm	other				22134	192152
THRA	thyroid hormone receptor, alpha	--					Nucleus	ligand-dependent nuclear receptor		3,5-diiodothyropropionic acid, denosumab/levothyroxine, amiodarone, levothyroxine, dextrothyroxine, L-triiodothyronine	7067	21833	81812
TNF	tumor necrosis factor	--				1	Extracellular Space	cytokine	diagnosis,disease progression,efficacy,prognosis,response to therapy,safety,unspecified application	adalimumab, etanercept, infliximab, certolizumab, golimumab, infliximab/methotrexate, dexamethasone/thalidomide, dexamethasone/pomalidomide, cyclophosphamide/dexamethasone/thalidomide, golimumab/methotrexate, bortezomib/dexamethasone/thalidomide, rituximab/thalidomide, bortezomib/thalidomide, prednisone/thalidomide, adalimumab/methotrexate, pomalidomide, thalidomide	7124	21926	24835
TRPC3	transient receptor potential cation channel, subfamily C, member 3	--					Plasma Membrane	ion channel			7222	22065	60395
TTR	transthyretin	P07309	-2.947	2.76E-22	6.83E-20	6	Extracellular Space	transporter	diagnosis,efficacy,prognosis,unspecified application		7276	22139	24856
TXNRD2	thioredoxin reductase 2	J3QMN4	1.581	1.19E-07	5.14E-06	4	Cytoplasm	enzyme			10587	26462	50551
UBA6	ubiquitin-like modifier activating enzyme 6	Q8C7R4	1.178	4.13E-01	7.19E-01		Cytoplasm	enzyme			55236	231380	305268
UQCRFS1	ubiquinol-cytochrome c reductase, Rieske iron-sulfur polypeptide 1	Q9CR68	-1.536	3.33E-06	1.07E-04	8	Cytoplasm	enzyme			7386	66694	291103
VAMP1	vesicle-associated membrane protein 1 (synaptobrevin 1)	Q62442-2	-1.271	1.08E-07	4.73E-06	3	Cytoplasm	transporter		botulinum toxin type B	6843	22317
VDAC2	voltage-dependent anion channel 2	Q60930	-2.031	3.31E-11	2.62E-09	1	Cytoplasm	ion channel			7417	22334	83531
VPS36	vacuolar protein sorting 36 homolog (S. cerevisiae)	Q91XD6	1.452	5.66E-06	1.72E-04		Cytoplasm	other			51028	70160	290851
VSNL1	visinin-like 1	P62761	-1.548	2.37E-11	1.93E-09	2	Cytoplasm	other			7447	26950	24877
WWP2	WW domain containing E3 ubiquitin protein ligase 2	Q9DBH0	5.844	1.16E-07	5.02E-06		Cytoplasm	enzyme			11060	66894	291999
XPO1	exportin 1	Q6P5F9	1.105	4.60E-01	7.52E-01	15	Nucleus	transporter	diagnosis,efficacy	selinexor	7514	103573	85252
ZDHHC17	zinc finger, DHHC-type containing 17	Q80TN5	6.049	2.50E-14	2.98E-12	2	Cytoplasm	enzyme			23390	320150	366889
ZMPSTE24	zinc metallopeptidase STE24	Q80W54	-1.618	3.54E-05	8.63E-04	9	Nucleus	peptidase			10269	230709	313564
ZNF423	zinc finger protein 423	--					Nucleus	transcription regulator			23090	94187	94188

## Sheet: CPs
© 2000-2015 QIAGEN. All rights reserved.
Ingenuity Canonical Pathways	-log(p-value)	Ratio	z-score	Molecules
Oxidative Phosphorylation	2.19E01	2.74E-01	NaN	Atp5e,NDUFB9,MT-CO1,NDUFB3,NDUFS7,NDUFA12,NDUFA1,NDUFB7,NDUFB8,NDUFA5,NDUFA2,Cox6c,NDUFB10,NDUFA13,NDUFA8,NDUFS3,NDUFA7,MT-CO2,NDUFB4,NDUFB5,UQCRFS1,NDUFS8,NDUFV2
Mitochondrial Dysfunction	1.9E01	1.81E-01	NaN	NDUFB9,NDUFA12,NDUFA1,NDUFB7,NDUFA5,NDUFA13,NDUFA8,NDUFA7,UQCRFS1,TXNRD2,NDUFV2,NDUFS8,Atp5e,MT-CO1,NDUFB3,NDUFS7,NDUFB8,NDUFA2,Cox6c,NDUFB10,NDUFS3,VDAC2,MT-CO2,NDUFB5,NDUFB4
EIF2 Signaling	1.59E01	1.65E-01	-4.000	RPL7A,RPL17,RPS26,RPL13A,RPL21,RPL35,RPL22,RPL37A,RPL23,RPL26,RPL12,RPS16,RPLP0,RPL18,RPL38,FAU,RPS15A,RPS28,RPL27,RPL27A,RPL19,RPS15
Cardiac β-adrenergic Signaling	3.23E00	6.78E-02	2.449	PPP1R14C,GNG5,ADCY3,ADCY5,PPM1L,GNG2,PDE2A,PDE10A
Regulation of eIF4 and p70S6K Signaling	2.62E00	6.09E-02	NaN	RPS16,RPS26,RPS15A,FAU,PPM1L,RPS28,RPS15
Gustation Pathway	2.61E00	6.98E-02	NaN	GNG5,ADCY3,ADCY5,GNG2,PDE2A,PDE10A
Gαi Signaling	2.58E00	5.98E-02	0.000	GNG5,ADCY3,ADCY5,RAP1GAP,GNG2,CHRM4,GRM3
Protein Kinase A Signaling	2.57E00	4.07E-02	-0.302	PPP1R14C,HIST1H1D,ADD1,GNG5,ADCY3,ADCY5,H3F3A/H3F3B,MYL6B,GNG2,PDE2A,CAMK2A,PDE10A
Relaxin Signaling	2.5E00	5.79E-02	0.447	GNG5,ADCY3,ADCY5,GUCY1A3,GNG2,PDE2A,PDE10A
Cellular Effects of Sildenafil (Viagra)	2.37E00	6.25E-02	NaN	ADCY3,ADCY5,MYL6B,GUCY1A3,PDE2A,KCNQ3
Dopamine Receptor Signaling	2.32E00	7.25E-02	1.000	PPP1R14C,ADCY3,ADCY5,NCS1,PPM1L
mTOR Signaling	1.94E00	4.55E-02	NaN	RPS16,RPS26,RPS15A,FAU,PPM1L,RPS28,RPS15
cAMP-mediated signaling	1.78E00	3.92E-02	1.414	ADCY3,ADCY5,RAP1GAP,PDE2A,CHRM4,CAMK2A,PDE10A,GRM3
Breast Cancer Regulation by Stathmin1	1.72E00	4.12E-02	NaN	PPP1R14C,GNG5,ADCY3,ADCY5,PPM1L,GNG2,CAMK2A
Granzyme B Signaling	1.64E00	1.33E-01	NaN	LMNB1,BID
Gαs Signaling	1.62E00	4.85E-02	-0.447	ADD1,GNG5,ADCY3,ADCY5,GNG2
GPCR-Mediated Nutrient Sensing in Enteroendocrine Cells	1.6E00	5.71E-02	NaN	GNG5,ADCY3,ADCY5,GNG2
Trehalose Degradation II (Trehalase)	1.5E00	5E-01	NaN	HK1
CREB Signaling in Neurons	1.47E00	3.97E-02	1.000	GNG5,ADCY3,ADCY5,GNG2,CAMK2A,GRM3
G-Protein Coupled Receptor Signaling	1.44E00	3.38E-02	NaN	ADCY3,ADCY5,RAP1GAP,PDE2A,CHRM4,CAMK2A,PDE10A,GRM3
α-Adrenergic Signaling	1.43E00	5.06E-02	NaN	GNG5,ADCY3,ADCY5,GNG2
Thrombin Signaling	1.37E00	3.75E-02	-2.000	GNG5,ADCY3,ADCY5,MYL6B,GNG2,CAMK2A
Glycogen Biosynthesis II (from UDP-D-Glucose)	1.33E00	3.33E-01	NaN	GYG1
IL-1 Signaling	1.32E00	4.65E-02	NaN	GNG5,ADCY3,ADCY5,GNG2
CDK5 Signaling	1.27E00	4.49E-02	1.000	PPP1R14C,ADCY3,ADCY5,PPM1L
Antiproliferative Role of Somatostatin Receptor 2	1.24E00	5.45E-02	NaN	GNG5,GUCY1A3,GNG2
CXCR4 Signaling	1.22E00	3.79E-02	-2.236	GNG5,ADCY3,ADCY5,MYL6B,GNG2
Thioredoxin Pathway	1.21E00	2.5E-01	NaN	TXNRD2
Pentose Phosphate Pathway (Non-oxidative Branch)	1.21E00	2.5E-01	NaN	RPE
GDP-glucose Biosynthesis	1.21E00	2.5E-01	NaN	HK1
Glutamate Receptor Signaling	1.21E00	5.26E-02	NaN	GNG5,GNG2,GRM3
Dopamine-DARPP32 Feedback in cAMP Signaling	1.16E00	3.62E-02	2.000	PPP1R14C,ADCY3,ADCY5,PPM1L,GUCY1A3
Glucose and Glucose-1-phosphate Degradation	1.11E00	2E-01	NaN	HK1
G Protein Signaling Mediated by Tubby	1.11E00	6.9E-02	NaN	GNG5,GNG2
tRNA Splicing	1.11E00	6.9E-02	NaN	PDE2A,PDE10A
GABA Receptor Signaling	1.1E00	4.76E-02	NaN	ADCY3,ADCY5,KCNQ3
P2Y Purigenic Receptor Signaling Pathway	1.1E00	3.92E-02	0.000	GNG5,ADCY3,ADCY5,GNG2
Mismatch Repair in Eukaryotes	9.74E-01	1.43E-01	NaN	RPA1
UDP-N-acetyl-D-galactosamine Biosynthesis II	9.74E-01	1.43E-01	NaN	HK1
Mechanisms of Viral Exit from Host Cells	9.52E-01	5.56E-02	NaN	LMNB1,VPS36
Role of NFAT in Cardiac Hypertrophy	9.41E-01	3.11E-02	-0.447	GNG5,ADCY3,ADCY5,GNG2,CAMK2A
Pentose Phosphate Pathway	9.19E-01	1.25E-01	NaN	RPE
Serotonin Receptor Signaling	8.94E-01	5.13E-02	NaN	ADCY3,ADCY5
Prostanoid Biosynthesis	8.71E-01	1.11E-01	NaN	HPGDS
Oleate Biosynthesis II (Animals)	8.71E-01	1.11E-01	NaN	FADS2
Role of CHK Proteins in Cell Cycle Checkpoint Control	8.59E-01	4.88E-02	NaN	PPM1L,RPA1
Granzyme A Signaling	8.29E-01	1E-01	NaN	HIST1H1D
Neuropathic Pain Signaling In Dorsal Horn Neurons	7.93E-01	3.45E-02	NaN	KCNQ3,CAMK2A,GRM3
Vitamin-C Transport	7.91E-01	9.09E-02	NaN	TXNRD2
DNA Double-Strand Break Repair by Homologous Recombination	7.56E-01	8.33E-02	NaN	RPA1
Phospholipase C Signaling	7.56E-01	2.69E-02	NaN	GNG5,ADCY3,ADCY5,MYL6B,GNG2
Cardiac Hypertrophy Signaling	7.3E-01	2.63E-02	-0.447	GNG5,ADCY3,ADCY5,MYL6B,GNG2
γ-linolenate Biosynthesis II (Animals)	7.25E-01	7.69E-02	NaN	FADS2
Glutathione Redox Reactions I	6.96E-01	7.14E-02	NaN	GPX3
Pyrimidine Deoxyribonucleotides De Novo Biosynthesis I	6.96E-01	7.14E-02	NaN	NME3
Corticotropin Releasing Hormone Signaling	6.88E-01	3.06E-02	NaN	ADCY3,ADCY5,GUCY1A3
Synaptic Long Term Potentiation	6.63E-01	2.97E-02	NaN	PPP1R14C,CAMK2A,GRM3
CCR5 Signaling in Macrophages	6.06E-01	3.33E-02	NaN	GNG5,GNG2
GPCR-Mediated Integration of Enteroendocrine Signaling Exemplified by an L Cell	6.06E-01	3.33E-02	NaN	ADCY3,ADCY5
Cell Cycle Control of Chromosomal Replication	6E-01	5.56E-02	NaN	RPA1
Glutathione-mediated Detoxification	6E-01	5.56E-02	NaN	HPGDS
Leptin Signaling in Obesity	5.96E-01	3.28E-02	NaN	ADCY3,ADCY5
Pyrimidine Ribonucleotides De Novo Biosynthesis	5.8E-01	5.26E-02	NaN	NME3
Pyrimidine Ribonucleotides Interconversion	5.8E-01	5.26E-02	NaN	NME3
RAR Activation	5.77E-01	2.44E-02	NaN	RPL7A,NRIP2,ADCY3,ADCY5
Synaptic Long Term Depression	5.71E-01	2.65E-02	NaN	PPM1L,GUCY1A3,GRM3
Tumoricidal Function of Hepatic Natural Killer Cells	5.61E-01	5E-02	NaN	BID
GNRH Signaling	5.51E-01	2.59E-02	NaN	ADCY3,ADCY5,CAMK2A
STAT3 Pathway	5.3E-01	2.94E-02	NaN	FGFR3,NDUFA13
Cytotoxic T Lymphocyte-mediated Apoptosis of Target Cells	5.26E-01	4.55E-02	NaN	BID
Ephrin B Signaling	5.22E-01	2.9E-02	NaN	GNG5,GNG2
Melanocyte Development and Pigmentation Signaling	5.05E-01	2.82E-02	NaN	ADCY3,ADCY5
eNOS Signaling	5E-01	2.42E-02	NaN	ADCY3,ADCY5,GUCY1A3
HIPPO signaling	4.89E-01	2.74E-02	NaN	PPP1R14C,PPM1L
PAK Signaling	4.66E-01	2.63E-02	NaN	MYL6B,GIT1
Gap Junction Signaling	4.65E-01	2.31E-02	NaN	ADCY3,ADCY5,GUCY1A3
Nucleotide Excision Repair Pathway	4.54E-01	3.7E-02	NaN	RPA1
tRNA Charging	4.41E-01	3.57E-02	NaN	HARS2
Triacylglycerol Biosynthesis	4.41E-01	3.57E-02	NaN	LPPR3
Tight Junction Signaling	4.34E-01	2.21E-02	NaN	CLDN11,PPM1L,MYL6B
G Beta Gamma Signaling	4.31E-01	2.47E-02	NaN	GNG5,GNG2
SAPK/JNK Signaling	4.31E-01	2.47E-02	NaN	GNG5,GNG2
Endothelin-1 Signaling	4.23E-01	2.17E-02	NaN	ADCY3,ADCY5,GUCY1A3
Circadian Rhythm Signaling	4.17E-01	3.33E-02	NaN	AVP
TWEAK Signaling	4.17E-01	3.33E-02	NaN	BID
Axonal Guidance Signaling	4.16E-01	1.88E-02	NaN	CHMP1A,GNG5,ROBO1,MYL6B,GIT1,GNG2,ABLIM2
Hepatic Cholestasis	4.14E-01	2.14E-02	NaN	ABCB11,ADCY3,ADCY5
Cell Cycle Regulation by BTG Family Proteins	4.06E-01	3.23E-02	NaN	PPM1L
FXR/RXR Activation	4.05E-01	2.35E-02	NaN	ABCB11,TTR
Inhibition of Angiogenesis by TSP1	3.96E-01	3.12E-02	NaN	GUCY1A3
Sertoli Cell-Sertoli Cell Junction Signaling	3.9E-01	2.07E-02	NaN	CLDN11,GUCY1A3,SPTBN2
Docosahexaenoic Acid (DHA) Signaling	3.86E-01	3.03E-02	NaN	BID
Nitric Oxide Signaling in the Cardiovascular System	3.81E-01	2.25E-02	NaN	GUCY1A3,PDE2A
RhoGDI Signaling	3.72E-01	2.01E-02	NaN	GNG5,MYL6B,GNG2
Sphingosine-1-phosphate Signaling	3.7E-01	2.2E-02	NaN	ADCY3,ADCY5
Colorectal Cancer Metastasis Signaling	3.7E-01	1.91E-02	0.000	GNG5,ADCY3,ADCY5,GNG2
Calcium Signaling	3.68E-01	2E-02	NaN	MCU,MYL6B,CAMK2A
Role of PKR in Interferon Induction and Antiviral Response	3.66E-01	2.86E-02	NaN	BID
Retinoic acid Mediated Apoptosis Signaling	3.66E-01	2.86E-02	NaN	BID
Sperm Motility	3.59E-01	2.15E-02	NaN	GUCY1A3,PDE2A
Neuroprotective Role of THOP1 in Alzheimer's Disease	3.57E-01	2.78E-02	NaN	PDYN
ERK/MAPK Signaling	3.55E-01	1.96E-02	NaN	PPP1R14C,PPM1L,H3F3A/H3F3B
Netrin Signaling	3.48E-01	2.7E-02	NaN	ABLIM2
Phototransduction Pathway	3.48E-01	2.7E-02	NaN	GUCY1A3
fMLP Signaling in Neutrophils	3.33E-01	2.04E-02	NaN	GNG5,GNG2
Renin-Angiotensin Signaling	3.33E-01	2.04E-02	NaN	ADCY3,ADCY5
CCR3 Signaling in Eosinophils	3.23E-01	2E-02	NaN	GNG5,GNG2
Androgen Signaling	3.23E-01	2E-02	NaN	GNG5,GNG2
Role of Oct4 in Mammalian Embryonic Stem Cell Pluripotency	3.16E-01	2.44E-02	NaN	WWP2
Wnt/Ca+ pathway	3.16E-01	2.44E-02	NaN	CAMK2A
Activation of IRF by Cytosolic Pattern Recognition Receptors	2.95E-01	2.27E-02	NaN	PPIB
CD27 Signaling in Lymphocytes	2.95E-01	2.27E-02	NaN	BID
TNFR1 Signaling	2.95E-01	2.27E-02	NaN	BID
nNOS Signaling in Neurons	2.88E-01	2.22E-02	NaN	CAMK2A
Mitotic Roles of Polo-Like Kinase	2.82E-01	2.17E-02	NaN	PPM1L
UVB-Induced MAPK Signaling	2.75E-01	2.13E-02	NaN	H3F3A/H3F3B
Eicosanoid Signaling	2.75E-01	2.13E-02	NaN	HPGDS
ATM Signaling	2.63E-01	2.04E-02	NaN	BID
ErbB4 Signaling	2.52E-01	1.96E-02	NaN	ERBB4
Myc Mediated Apoptosis Signaling	2.47E-01	1.92E-02	NaN	BID
PXR/RXR Activation	2.41E-01	1.89E-02	NaN	ABCB11
Induction of Apoptosis by HIV1	2.31E-01	1.82E-02	NaN	BID
GM-CSF Signaling	2.26E-01	1.79E-02	NaN	CAMK2A
Role of BRCA1 in DNA Damage Response	2.22E-01	1.75E-02	NaN	RPA1
Melatonin Signaling	2.08E-01	1.67E-02	NaN	CAMK2A
Chemokine Signaling	2.08E-01	1.67E-02	NaN	CAMK2A
CTLA4 Signaling in Cytotoxic T Lymphocytes	2E-01	1.61E-02	NaN	PPM1L
Crosstalk between Dendritic Cells and Natural Killer Cells	2E-01	1.61E-02	NaN	CAMK2A

## Sheet: upstream
© 2000-2015 QIAGEN. All rights reserved.
Upstream Regulator	Exp Fold Change	Molecule Type	Predicted Activation State	Activation z-score	Notes	p-value of overlap	Target molecules in dataset	Mechanistic Network
MYC		transcription regulator	Inhibited	-2.673		5.00E-08	CRYAB,DBI,MAP4,RPL19,RPL21,RPL22,RPL23,RPL26,RPL27,RPL35,RPL7A,RPS15A,RPS16,VDAC2
HTT	1.037	transcription regulator		-1.069		1.58E-06	ADCY5,AVP,BID,CAMK2A,CHAT,CRYAB,ELAVL4,ETNPPL,FXYD6,GPX3,GRM3,MOBP,NDUFS3,Nefm,OSBPL8,PDE10A,RAP1GAP,SPTBN2,TAGLN3,VAMP1,VSNL1
MAPT	1.081	other				1.37E-03	Atp5e,Cox6c,DBI,GNG2,H2AFV,HK1,NDUFA5,NDUFA8,S100B,VSNL1
PSEN1	1.021	peptidase				2.91E-03	Atp5e,CHAT,Cox6c,DBI,GNG2,H2AFV,HK1,MT-CO1,NDUFA5,NDUFA8,S100B,VSNL1
REST		transcription regulator				3.99E-03	CHRM4,KCNQ3,S100B
ACHE	1.940	enzyme				4.78E-03	CHAT,CHRM4
ASCL1		transcription regulator		1.067	bias	6.92E-03	LAMP5,Nefm,PDYN,SLC35D3
CPE	1.027	peptidase				8.04E-03	AVP,PDYN
ATN1		transcription regulator				1.02E-02	MOBP,Nefm,SPTBN2,TAGLN3,VAMP1,VSNL1
CPLX1	-1.552	transporter				1.55E-02	CPLX3
CPLX2	-1.120	other				1.55E-02	CPLX3
CACNA1B	1.074	ion channel				1.55E-02	AVP
PAIP2	-1.859	translation regulator				1.55E-02	CAMK2A
TRPC3		ion channel				1.55E-02	S100B
ZNF423		transcription regulator				1.55E-02	ADCY3
LHX6		transcription regulator				1.55E-02	GUCY1A3
PTHLH		other				1.55E-02	AVP
androstenedione		chemical - endogenous mammalian				1.55E-02	AVP
FMR1		other				1.94E-02	CAMK2A,PCDH10,UQCRFS1
ADAM10	-1.029	peptidase				2.44E-02	BID,CAMK2A,CRYAB,SHANK3
ACKR1		g-protein coupled receptor				2.80E-02	MYO5A,NINJ1
NKX2-3		transcription regulator		0.816		2.87E-02	AIF1L,CRYAB,MCTP1,MYO5A,RPL23,SDPR
AKAP5	1.577	other				3.08E-02	KCNQ3
NEFL	-1.202	other				3.08E-02	MYO5A
CRHBP		other				3.08E-02	AVP
RNF41		enzyme				3.08E-02	ERBB4
AIFM1	1.191	enzyme				3.08E-02	NDUFS7
GNRH1		other				3.12E-02	CHAT,PPP1R9B
UBA6	1.178	enzyme				4.59E-02	SHANK3
NR1H4		ligand-dependent nuclear receptor				4.59E-02	ABCB11
CRHR1		g-protein coupled receptor				4.59E-02	AVP
CLOCK		transcription regulator				4.59E-02	AVP
THRA		ligand-dependent nuclear receptor				4.59E-02	SYT12
GRM2	1.372	g-protein coupled receptor				4.59E-02	GRM3
KCNIP3		transcription regulator				4.59E-02	PDYN
GRIN1	-2.066	ion channel				4.59E-02	CAMK2A
CREB3L1		transcription regulator				4.59E-02	AVP

## Sheet: networks
© 2000-2015 QIAGEN. All rights reserved.
ID	Molecules in Network	Score	Focus Molecules	Top Diseases and Functions
1	ABCB11,ACTB,APP,DBI,DDX5,MAP4,MYC,NR1H4,RARA,RBP1,RPL19,RPL21,RPL22,RPL23,RPL26,RPL27,RPL35,RPL7A,RPS16,RPS19,RPS26,RPS15A,SP1,TNF,VDAC2	20	15	Biliary Hyperplasia, Hepatic System Development and Function, Liver Cholestasis
2	APP,BDNF,Ca2+,CDK5,CDK5R1,DLG4,ETNPPL,FXYD6,GPX3,GRIA1,GRIN2A,GRM1,GRM2,GRM3,HTT,L-dopa,L-glutamic acid,MAP2K4,MAPK8,MAPK10,MKNK1,MOBP,NDUFS3,Nefm,OSBPL8,PDE10A,RAP1GAP,SLC1A3,SPTBN2,STX3,STX1A,STXBP1,TAGLN3,VSNL1,ZDHHC17	17	15	Cell-To-Cell Signaling and Interaction, Nervous System Development and Function, Amino Acid Metabolism
3	ADCY3,AVP,beta-estradiol,CAV1,CECR5,CHRM4,CNR1,COMT,CRYAB,dopamine,DRD2,FAM160A2,FOS,GIT1,GRIA1,GRIN1,GRIN2A,GRIN2B,GRM1,HRAS,K+,L-glutamic acid,LAMTOR5,MMP9,NCS1,NECAB2,NOS1,NRP1,PAX6,PDYN,PPP1R9B,PTN,SLC35D3,SRC,VAMP1	17	15	Molecular Transport, Small Molecule Biochemistry, Cell-To-Cell Signaling and Interaction
4	APP,BDNF,beta-estradiol,CASK,CASKIN1,CHAT,CREB1,DLG4,dopamine,EGR2,FOS,GDNF,GRIN1,GUCY1A3,HOMER1,HTT,L-dopa,LRRC1,LZTS3,MAPT,NDUFA5,NDUFA8,NGF,PDE4DIP,PPM1L,PSEN1,ROBO1,SHANK3,SLC18A3,SLC2A13,SUB1,SYT12,TAOK1,Tgoln1,TXNRD2	15	14	Behavior, Nervous System Development and Function, Neurological Disease
5	ACKR1,ADCY5,APP,BDNF,Ca2+,CREB1,CYFIP1,DLG4,ELAVL1,ERBB4,FOS,GRIA1,GRIN1,HDAC4,HTT,K+,L-dopa,L-glutamic acid,LAMP5,MAPK1,MCTP1,MECP2,MKNK1,MOG,MYO5A,NAP1L5,NINJ1,NPY,OMG,PAFAH1B1,PAFAH1B3,POMC,PTGFRN,RPL37A,SV2C	15	14	Behavior, Cell-To-Cell Signaling and Interaction, Nervous System Development and Function
6	ADAM10,AIFM1,APP,Atp5e,BID,CAMK2A,CAMK2B,CDK5,CDK5R1,Cox6c,CPLX2,CPLX3,dehydroisoandrosterone,FABP3,FMR1,FOS,GNG2,GRIA1,GRIN1,GRIN2A,GRIN2B,H2AFV,MECP2,MKNK1,MMP9,MT-CO1,MTOR,NDUFS7,NGB,NOS1,Nrgn,PPIB,RPL12,SNAP25,TTR	14	13	Behavior, Cell Morphology, Cell-To-Cell Signaling and Interaction
7	AIF1L,ANG,APP,ATM,BDNF,Ca2+,CAV1,CDK5,CLDN11,CMTM5,dehydroisoandrosterone,FGFR3,FOS,GFAP,GRIA1,GRIN1,GRIN2A,GRIN2B,HK1,HPGDS,IL1B,Ins1,ITGB1,KCNQ3,L-glutamic acid,MAP2K4,MAP3K7,MMP9,MT-CO2,RPA1,RPLP0,S100B,SDPR,STXBP3,TGFB1	14	13	Behavior, Cell Death and Survival, Cell-To-Cell Signaling and Interaction
8	ADD1,AKT1,AP2A2,APP,ATXN1,Ca2+,CAMK2A,CYFIP1,DLG4,EEF2,ELAVL4,FMR1,GAP43,GRIA1,GRIA2,GRIA3,GRIK5,GRIN1,GRM1,HTT,K+,L-glutamic acid,NPY,OTOF,PCDH10,PDE2A,PRKCG,RTN4,STX1B,SYN1,TAC1,UQCRFS1	6	7	Cell-To-Cell Signaling and Interaction, Nervous System Development and Function, Behavior
9	LMNA,ZMPSTE24	1	1	Cell Morphology, Cellular Assembly and Organization, Connective Tissue Disorders
10	adenosine triphosphate,SLC25A27	1	1	Free Radical Scavenging, Small Molecule Biochemistry, Carbohydrate Metabolism
11	ITIH1,ITIH2	1	1	Carbohydrate Metabolism, Drug Metabolism, Small Molecule Biochemistry
12	arachidonic acid,FADS2	1	1	Lipid Metabolism, Molecular Transport, Small Molecule Biochemistry
13	LMNB1,LRRK2	1	1	Embryonic Development, Nervous System Development and Function, Organ Morphology
14	ABCC8,RAPGEF3,RAPGEF4	1	1	Cell-To-Cell Signaling and Interaction, Nervous System Development and Function, Cell Morphology
15	NUP88,NUP214,RAN,XPO1	1	1	Molecular Transport, Protein Trafficking, RNA Trafficking

## Sheet: dis and bio
© 2000-2015 QIAGEN. All rights reserved.
Categories	Diseases or Functions Annotation	p-Value	Predicted Activation State	Activation z-score	Molecules	# Molecules
Neurological Disease, Psychological Disorders	bipolar disorder	3.68E-05			AVP,CAMK2A,NCS1,NDUFS7,NDUFS8,PDYN	6
Psychological Disorders	Mood Disorders	7.01E-05			AVP,CAMK2A,NCS1,NDUFS7,NDUFS8,PDYN,PPP1R9B,PTN,RAP1GAP,TTR	10
Cellular Assembly and Organization, Cellular Development, Cellular Growth and Proliferation, Nervous System Development and Function, Tissue Development	growth of motor axons	7.49E-04			Nefm,PTN	2
Cellular Assembly and Organization, Cellular Function and Maintenance, Cellular Movement, Molecular Transport, Nervous System Development and Function	exocytosis of synaptic vesicles	8.20E-04			CPLX3,OTOF,SPTBN2,VAMP1	4
Behavior	conditioning	1.58E-03		1.000	CAMK2A,CHRM4,ERBB4,PDYN	4
Protein Synthesis	translation of protein	2.13E-03			ELAVL1,ELAVL4,RPL13A,RPL17,RPL19,RPL23,RPL27A,RPL38	8
Cell Morphology, Cellular Assembly and Organization, Cellular Development, Cellular Function and Maintenance, Embryonic Development, Nervous System Development and Function, Tissue Development, Tissue Morphology	quantity of neurofilaments	2.44E-03			MYO5A,Nefm	2
Organismal Injury and Abnormalities, Tissue Morphology	size of lesion	2.52E-03		-0.000	BID,CAMK2A,CRYAB,GPX3,HPGDS,MOG,NGB	7
Gene Expression, Protein Synthesis	translation of mRNA	2.77E-03			ELAVL1,RPL13A,RPL17,RPL19,RPL23,RPL27A,RPL38	7
Behavior	contextual conditioning	3.63E-03			CAMK2A,ERBB4	2
Neurological Disease, Psychological Disorders	major depression	4.27E-03			AVP,CAMK2A,PDYN,PTN,RAP1GAP,TTR	6
Cellular Assembly and Organization	aggregation of mitochondria	5.02E-03			BID,NGB	2
Embryonic Development, Nervous System Development and Function, Organ Development, Organismal Development, Tissue Development	myelination of forebrain	5.02E-03			FGFR3,MYO5A	2
Neurological Disease, Psychological Disorders	Schizophrenia	6.08E-03			CHRM4,ELAVL4,GNG2,GRM3,NCS1,NDUFA5,PPP1R9B,TTR,VSNL1	9
Cellular Assembly and Organization, Nervous System Development and Function	docking of synaptic vesicles	6.63E-03			SPTBN2,STX3	2
Cellular Assembly and Organization	transport of vesicles	6.81E-03			CPLX3,OTOF,RAB33A,SPTBN2,VAMP1	5
Cellular Assembly and Organization, Cellular Function and Maintenance	quantity of microtubules	8.43E-03			MAP4,Nefm	2
Organismal Injury and Abnormalities, Tissue Morphology	volume of lesion	8.68E-03		0.152	BID,CRYAB,MOG,NGB	4
Carbohydrate Metabolism, Small Molecule Biochemistry	synthesis of inositol phosphate	1.04E-02			AVP,PTGFRN	2
Tissue Development	organization of nervous tissue	1.28E-02			ELFN1,MYO5A,Nefm,SPTBN2	4
Cell Morphology	shape change of neurites	1.38E-02		-1.011	ADCY3,CAMK2A,ELAVL4,ERBB4,GIT1,MOG,MYO5A,Nefm,ROBO1,S100B,SPTBN2	11
Cell Morphology, Cellular Assembly and Organization, Cellular Development, Cellular Function and Maintenance, Embryonic Development, Nervous System Development and Function, Tissue Development	dendritic growth/branching	1.51E-02		-0.418	CAMK2A,ELAVL4,ERBB4,GIT1,MOG,MYO5A,Nefm,ROBO1,SPTBN2	9
Behavior	Pavlovian-instrumental transfer	1.59E-02			CHRM4	1
Cell Morphology, Cellular Assembly and Organization	abnormal morphology of Nucleus	1.59E-02			LMNB1	1
Cell-To-Cell Signaling and Interaction, Nervous System Development and Function	activation of KNDy neurons	1.59E-02			PDYN	1
Cell Morphology	blebbing of nucleus	1.59E-02			LMNB1	1
Cell-To-Cell Signaling and Interaction, Nervous System Development and Function	conduction of optic nerve	1.59E-02			ERBB4	1
Embryonic Development, Nervous System Development and Function, Organ Development, Organismal Development, Tissue Development	delay in myelination of cerebellum	1.59E-02			FGFR3	1
Embryonic Development, Nervous System Development and Function, Organ Development, Organismal Development, Tissue Development	delay in myelination of forebrain	1.59E-02			FGFR3	1
Cell-To-Cell Signaling and Interaction, Cellular Function and Maintenance, Molecular Transport, Small Molecule Biochemistry	efflux of acetylcholine	1.59E-02			CHRM4	1
Lipid Metabolism, Molecular Transport, Small Molecule Biochemistry	excretion of taurocholic acid	1.59E-02			ABCB11	1
Metabolic Disease	familial neurohypophyseal diabetes insipidus	1.59E-02			AVP	1
Organismal Functions	flicking of tail	1.59E-02			PDYN	1
Molecular Transport	flux of water	1.59E-02			AVP	1
Cellular Assembly and Organization	formation of GW body	1.59E-02			ELAVL1	1
Cancer, Organismal Injury and Abnormalities, Reproductive System Disease	growth of mammary tumor	1.59E-02			ELAVL1	1
Cellular Growth and Proliferation, Nervous System Development and Function	inhibition of giant reticular neurons	1.59E-02			GRM3	1
Neurological Disease	interictal epileptiform discharge of hippocampal neurons	1.59E-02			CAMK2A	1
Cell-To-Cell Signaling and Interaction, Nervous System Development and Function	long term depression of medial prefrontal cortex	1.59E-02			GRM3	1
Cellular Movement, Embryonic Development	migration of cranial neural crest cells	1.59E-02			ERBB4	1
Cellular Function and Maintenance, Nervous System Development and Function, Organ Morphology, Tissue Development	organization of Purkinje cells	1.59E-02			SPTBN2	1
Cellular Development, Cellular Growth and Proliferation, Hematological System Development and Function	proliferation of helper T lymphocytes	1.59E-02			MOG	1
Organ Morphology, Organismal Functions	repair of brain	1.59E-02			ABCC8	1
Reproductive System Development and Function	reproduction	1.59E-02			ERBB4	1
Behavior	self-administration of amphetamine	1.59E-02			CAMK2A	1
Cell Morphology, Cellular Assembly and Organization, Nervous System Development and Function, Tissue Morphology	size of axon terminals	1.59E-02			CHAT	1
Cellular Development, Nervous System Development and Function, Tissue Development	specification of primary neurons	1.59E-02			ELAVL4	1
Lipid Metabolism, Small Molecule Biochemistry	synthesis of prostaglandin D2	1.59E-02			HPGDS	1
Lipid Metabolism, Molecular Transport, Small Molecule Biochemistry	uptake of triacylglycerol	1.59E-02			CISD1	1
Cardiovascular Disease, Organismal Injury and Abnormalities, Tissue Morphology	size of infarct	1.63E-02		-0.130	BID,CAMK2A,GPX3,HPGDS,NGB	5
Cell Morphology, Cellular Movement, Nervous System Development and Function	innervation of motor neurons	2.02E-02			CHAT,ERBB4	2
Cell Morphology, Cellular Assembly and Organization, Cellular Development, Cellular Function and Maintenance, Nervous System Development and Function, Tissue Development	neuritogenesis	2.09E-02		-0.660	ADCY3,CAMK2A,CHAT,ELAVL4,ERBB4,GDPD5,GIT1,MOG,MYO5A,Nefm,NGB,PPP1R9B,PTN,RAB33A,ROBO1,S100B,SPTBN2,STX3	18
Cell Morphology, Cellular Assembly and Organization, Nervous System Development and Function, Tissue Morphology	size of nerve ending	2.61E-02			CHAT,MYO5A	2
Cell-To-Cell Signaling and Interaction, Nervous System Development and Function	long term depression	2.71E-02		0.299	ADCY5,CAMK2A,GRM3,MYO5A,PPP1R9B	5
Cell Morphology, Cellular Assembly and Organization, Cellular Development, Cellular Function and Maintenance, Embryonic Development, Nervous System Development and Function, Tissue Development	branching of neurites	2.72E-02		-0.730	CAMK2A,ELAVL4,ERBB4,GIT1,MOG,MYO5A,Nefm,ROBO1,S100B,SPTBN2	10
Cellular Development	branching of cells	2.87E-02		-1.011	CAMK2A,ELAVL1,ELAVL4,ERBB4,GIT1,MOG,MYO5A,Nefm,ROBO1,S100B,SPTBN2	11
Cellular Assembly and Organization	quantity of filaments	2.90E-02			MAP4,MYO5A,Nefm	3
Cell Morphology	sprouting	3.13E-02		-1.011	CAMK2A,ELAVL1,ELAVL4,ERBB4,GIT1,MOG,MYO5A,Nefm,ROBO1,S100B,SPTBN2	11
Hematological System Development and Function, Immune Cell Trafficking, Inflammatory Response, Tissue Development	accumulation of regulatory T lymphocytes	3.16E-02			MOG	1
Cell-To-Cell Signaling and Interaction	adherence of astrocytes	3.16E-02			ERBB4	1
Cellular Assembly and Organization	aggregation of membrane rafts	3.16E-02			NGB	1
Cell Death and Survival	apoptosis of activated T lymphocyte	3.16E-02			MOG	1
Cell Morphology, Cellular Assembly and Organization, Nervous System Development and Function, Tissue Morphology	area of presynaptic terminals	3.16E-02			MYO5A	1
Cellular Assembly and Organization	association of chromatin	3.16E-02			RPA1	1
Cell-To-Cell Signaling and Interaction, Hematological System Development and Function, Humoral Immune Response	binding of B lymphocytes	3.16E-02			RAP1GAP	1
Drug Metabolism, Lipid Metabolism, Small Molecule Biochemistry	binding of paclitaxel	3.16E-02			MAP4	1
Neurological Disease, Organismal Injury and Abnormalities	bleeding of spinal cord	3.16E-02			ABCC8	1
Cancer, Neurological Disease, Organismal Injury and Abnormalities	brainstem glioma	3.16E-02			H3F3A/H3F3B	1
Cellular Development, Nervous System Development and Function	delay in differentiation of oligodendrocytes	3.16E-02			FGFR3	1
Neurological Disease	demyelination of cerebellum	3.16E-02			HPGDS	1
Cell Morphology, Cellular Assembly and Organization	elongation of cilia	3.16E-02			ADCY3	1
Neurological Disease, Psychological Disorders	first-onset paranoid schizophrenia	3.16E-02			TTR	1
Cell-To-Cell Signaling and Interaction, Cellular Assembly and Organization, Cellular Development, Cellular Function and Maintenance, Nervous System Development and Function, Tissue Development	formation of neuromuscular synapse	3.16E-02			CHAT	1
Cellular Movement, Nervous System Development and Function	guidance of corticocortical axons	3.16E-02			ROBO1	1
Cellular Movement, Nervous System Development and Function	guidance of corticofugal fibers	3.16E-02			ROBO1	1
Cellular Movement, Nervous System Development and Function	guidance of corticospinal axon	3.16E-02			ROBO1	1
Cellular Movement, Nervous System Development and Function	guidance of corticothalamic axons	3.16E-02			ROBO1	1
Tissue Development	inflammation of white matter	3.16E-02			MOG	1
Nervous System Development and Function	inhibition of sympathetic nervous system	3.16E-02			AVP	1
Cell-To-Cell Signaling and Interaction, Nervous System Development and Function	long term depression of corticostriatal neurons	3.16E-02			ADCY5	1
Cell-To-Cell Signaling and Interaction, Nervous System Development and Function	long term depression of striatopallidal neurons	3.16E-02			ADCY5	1
Hematological System Development and Function, Tissue Morphology	number of activated T lymphocyte	3.16E-02			MOG	1
Cell Morphology, Cellular Assembly and Organization, Cellular Development, Cellular Growth and Proliferation, Nervous System Development and Function, Tissue Development	outgrowth of motor axons	3.16E-02			PTN	1
Nervous System Development and Function	pathfinding of olfactory receptor neurons	3.16E-02			ROBO1	1
Cellular Function and Maintenance, Cellular Growth and Proliferation, Hematological System Development and Function, Tissue Development	production of TREG cells	3.16E-02			MOG	1
Small Molecule Biochemistry	production of lactic acid	3.16E-02			SLC25A27	1
Cell Morphology, Nervous System Development and Function	projection of olfactory receptor neurons	3.16E-02			ROBO1	1
Cellular Assembly and Organization	quantity of cytoplasmic inclusions	3.16E-02			CRYAB	1
Lipid Metabolism, Molecular Transport, Small Molecule Biochemistry	quantity of prostaglandin D2	3.16E-02			HPGDS	1
Cell-To-Cell Signaling and Interaction, Hematological System Development and Function	response of Th17 cells	3.16E-02			MOG	1
Cardiovascular System Development and Function	revascularization	3.16E-02			ELAVL1	1
Drug Metabolism, Endocrine System Development and Function, Lipid Metabolism, Molecular Transport, Small Molecule Biochemistry	secretion of hydrocortisone	3.16E-02			AVP	1
Nervous System Development and Function, Organ Morphology, Organismal Development	size of hippocampal commissure	3.16E-02			ROBO1	1
Hereditary Disorder, Neurological Disease	small fiber neuropathy	3.16E-02			ERBB4	1
Cardiovascular System Development and Function, Organismal Development	vascularization of hindlimb	3.16E-02			ELAVL1	1
Cardiovascular System Development and Function	vasoconstriction of afferent arterioles	3.16E-02			AVP	1
Cell Morphology, Cell-To-Cell Signaling and Interaction, Nervous System Development and Function	plasticity of neuronal synapse	3.61E-02			CAMK2A,S100B	2
Neurological Disease	Movement Disorders	3.69E-02			ADCY5,ETNPPL,H3F3A/H3F3B,MOG,MYO5A,NAP1L5,RAP1GAP,RPL13A,RPL17,SPTBN2,VAMP1,VSNL1	12
Cardiovascular Disease, Organismal Injury and Abnormalities	damage of endothelial tissue	3.86E-02			GIT1,HPGDS,RAP1GAP	3
Cell-To-Cell Signaling and Interaction, Cellular Assembly and Organization, Nervous System Development and Function, Tissue Morphology	quantity of synapse	3.86E-02			CHAT,ERBB4,GIT1	3
Inflammatory Response	Th17 immune response	4.70E-02			MOG	1
Cellular Compromise, Neurological Disease, Organismal Injury and Abnormalities	atrophy of axons	4.70E-02			Nefm	1
Cell-To-Cell Signaling and Interaction	binding of astrocytes	4.70E-02			ERBB4	1
Lipid Metabolism, Molecular Transport, Small Molecule Biochemistry	concentration of docosahexaenoic acid	4.70E-02			FADS2	1
Cell Signaling, Vitamin and Mineral Metabolism	delay in initiation of clearance of Ca2+	4.70E-02			MCU	1
Cell Morphology, Cell-To-Cell Signaling and Interaction, Cellular Function and Maintenance, Nervous System Development and Function	depolarization of postsynaptic neurons	4.70E-02			GRM3	1
Embryonic Development, Nervous System Development and Function, Organismal Development, Tissue Development	development of cortical subplate	4.70E-02			FGFR3	1
Embryonic Development, Nervous System Development and Function, Organ Development, Organismal Development, Tissue Development	development of layer II-III of neocortex	4.70E-02			FGFR3	1
Cell-To-Cell Signaling and Interaction, Cellular Assembly and Organization, Cellular Development, Cellular Function and Maintenance, Nervous System Development and Function, Tissue Development	establishment of neuromuscular synapse	4.70E-02			CHAT	1
Nervous System Development and Function, Organ Development	growth of cerebral neocortex	4.70E-02			FGFR3	1
Endocrine System Development and Function	insulin sensitivity index	4.70E-02			CISD1	1
Cell-To-Cell Signaling and Interaction, Nervous System Development and Function	long-term potentiation of barrel cortex	4.70E-02			CAMK2A	1
Cell Death and Survival	loss of radial glial progenitor cell	4.70E-02			FGFR3	1
Cellular Function and Maintenance, Cellular Growth and Proliferation	production of intermediate neuronal precursors	4.70E-02			FGFR3	1
Cell Morphology, Cellular Development, Embryonic Development, Nervous System Development and Function, Tissue Development	stratification of neurons	4.70E-02			LMNB1	1
Lipid Metabolism, Small Molecule Biochemistry	synthesis of dinoprost	4.70E-02			HPGDS	1
Cancer, Neurological Disease, Organismal Injury and Abnormalities	thalamic astrocytoma	4.70E-02			H3F3A/H3F3B	1
Lipid Metabolism, Molecular Transport, Small Molecule Biochemistry	concentration of eicosanoid	4.73E-02			FADS2,HPGDS	2
Free Radical Scavenging	production of superoxide	4.73E-02			DBI,PDYN	2
Cellular Assembly and Organization, Cellular Development, Cellular Growth and Proliferation, Nervous System Development and Function, Tissue Development	growth of neurites	4.81E-02		-1.100	ELAVL4,ERBB4,FGFR3,Nefm,NGB,NINJ1,OMG,PTN,RAB33A,RAP1GAP,ROBO1,S100B	12
Cell Morphology, Nervous System Development and Function, Tissue Morphology	size of neurons	5.00E-02			CAMK2A,CHAT,MYO5A,Nefm	4
