# Supplementary material for: Label-Free Proteomic Analysis of Protein Changes in the Striatum during Chronic Ethanol Use and Early Withdrawal
Source: Front Behav Neurosci. 2016 Mar 11;10:46. doi: 10.3389/fnbeh.2016.00046 (PMC4786553; doi:10.3389/fnbeh.2016.00046)
Supplement: Supplementary file 9 [file DataSheet7.XLS]

## Sheet: NAc-WvC
© 2000-2015 QIAGEN. All rights reserved.
Symbol	Entrez Gene Name	GenPept/UniProt/Swiss-Prot Accession	Exp Fold Change	Exp p-value	Exp False Discovery Rate (q-value)	Networks	Location	Type(s)	Biomarker Application(s)	Drug(s)	Entrez Gene ID for Human	Entrez Gene ID for Mouse	Entrez Gene ID for Rat
ABCB11	ATP-binding cassette, sub-family B (MDR/TAP), member 11	J3QNY6	4.069	7.58E-15	1.50E-12	5	Plasma Membrane	transporter	unspecified application		8647	27413	83569
AKT1	v-akt murine thymoma viral oncogene homolog 1	P31750	1.102	5.34E-01	8.86E-01	4	Cytoplasm	kinase	diagnosis,efficacy,response to therapy	MK2206, GSK2141795, ipatasertib, LY2780301, ARQ 092, AZD5363, BAY1125976, MPT0E028, archexin, enzastaurin, perifosine	207	11651	24185
AKT3	v-akt murine thymoma viral oncogene homolog 3	Q9WUA6-2	1.161	1.92E-01	6.82E-01		Cytoplasm	kinase	efficacy	enzastaurin	10000	23797	29414
ALDH1A1	aldehyde dehydrogenase 1 family, member A1	P24549	1.891	1.62E-06	1.12E-04	3	Cytoplasm	enzyme	diagnosis,disease progression	disulfiram, chlorpropamide	216	11668	24188
ALG5	ALG5, dolichyl-phosphate beta-glucosyltransferase	Q9DB25	-1.939	1.06E-08	1.14E-06		Cytoplasm	enzyme			29880	66248	295051
AMPH	amphiphysin	Q7TQF7	-1.006	9.51E-01	9.97E-01	1	Plasma Membrane	other			273	218038	60668|100910792
ANK3	ankyrin 3, node of Ranvier (ankyrin G)	S4R2K9	-1.257	3.55E-07	2.81E-05	4	Plasma Membrane	other			288	11735	361833
APOB	apolipoprotein B	E9Q1Y3	-2.126	1.12E-06	8.13E-05	6	Extracellular Space	transporter	diagnosis,efficacy	mipomersen	338	238055	54225
APP	amyloid beta (A4) precursor protein	P12023-2	1.145	3.32E-01	7.84E-01	1	Plasma Membrane	other	diagnosis,efficacy,unspecified application	bapineuzumab, florbetapir F18, florbetaben F	351	11820	54226
ARFRP1	ADP-ribosylation factor related protein 1	Q80SX7	-1.367	5.95E-01	9.10E-01	6	Cytoplasm	enzyme			10139	76688	117051
ARPC5	actin related protein 2/3 complex, subunit 5, 16kDa	Q9CPW4	-1.300	3.56E-22	1.51E-19		Cytoplasm	other	unspecified application		10092	67771	360854
ATN1	atrophin 1	--					Nucleus	transcription regulator			1822	13498	100911672|29515
ATXN7	ataxin 7	--					Nucleus	other			6314	246103	361015
beta-estradiol	--	--				3	Other	chemical - endogenous mammalian	diagnosis,efficacy,safety
BICD1	bicaudal D homolog 1 (Drosophila)	Q8BR07-3	1.546	1.83E-05	9.78E-04	3	Cytoplasm	other			636	12121	362466
C5	complement component 5	--				4	Extracellular Space	cytokine		eculizumab, IgG	727	15139
C5AR1	complement component 5a receptor 1	--				4	Plasma Membrane	G-protein coupled receptor			728	12273	113959
Ca2+	--	--				1	Other	chemical - endogenous mammalian	diagnosis,efficacy,safety
CAMK2D	calcium/calmodulin-dependent protein kinase II delta	E9Q1T1	-1.081	6.79E-01	9.42E-01	1	Cytoplasm	kinase			817	108058	24246
CASP8	caspase 8, apoptosis-related cysteine peptidase	--				2	Nucleus	peptidase	diagnosis,efficacy,prognosis		841	12370	64044
CASP9	caspase 9, apoptosis-related cysteine peptidase	--				2	Cytoplasm	peptidase	diagnosis,efficacy	caspase-9 inhibitor	842	12371	58918
Ccl2	chemokine (C-C motif) ligand 2	--				4	Extracellular Space	cytokine	unspecified application			20296	24770
CCL5	chemokine (C-C motif) ligand 5	--				3,4	Extracellular Space	cytokine	diagnosis,efficacy,unspecified application		6352	20304	81780
Ccl7	chemokine (C-C motif) ligand 7	--				4	Extracellular Space	cytokine	unspecified application			20306	287561
CCR5	chemokine (C-C motif) receptor 5 (gene/pseudogene)	--				1,4	Plasma Membrane	G-protein coupled receptor	diagnosis,efficacy	maraviroc, vicriviroc, ancriviroc	1234	12774	117029
CD9	CD9 molecule	P40240	-1.274	2.69E-07	2.28E-05	2	Plasma Membrane	other	efficacy		928	12527	24936
CD36	CD36 molecule (thrombospondin receptor)	--				2	Plasma Membrane	transmembrane receptor	efficacy		948	12491	29184
Cdc42	cell division cycle 42	P60766	-1.297	2.51E-06	1.68E-04	3	Plasma Membrane	enzyme	unspecified application			12540	64465
CDC5L	cell division cycle 5-like	Q6A068	-23.384	7.57E-25	3.75E-22		Nucleus	other			988	71702	85434
CDK5R1	cyclin-dependent kinase 5, regulatory subunit 1 (p35)	--				2,3	Nucleus	kinase			8851	12569	116671
CHL1	cell adhesion molecule L1-like	P70232	1.270	4.69E-74	5.57E-71	3	Plasma Membrane	other			10752	12661	89828
CIT	citron rho-interacting serine/threonine kinase	P49025-3	-1.301	6.74E-07	5.13E-05	2	Cytoplasm	kinase			11113	12704	83620
CLDN11	claudin 11	Q60771	-4.472	1.66E-14	3.19E-12	2	Plasma Membrane	other			5010	18417	84588
COQ3	coenzyme Q3 methyltransferase	Q8BMS4	1.457	4.84E-06	3.00E-04		Cytoplasm	enzyme			51805	230027	29309
COX4I1	cytochrome c oxidase subunit IV isoform 1	P19783	-1.449	8.01E-07	5.88E-05	2	Cytoplasm	enzyme			1327	12857	29445
CRYM	crystallin, mu	O54983	1.463	6.49E-08	6.32E-06	1	Cytoplasm	enzyme			1428	12971	117024
CSF2	colony stimulating factor 2 (granulocyte-macrophage)	--				4	Extracellular Space	cytokine	efficacy,prognosis,unspecified application		1437	12981	116630
CSF3	colony stimulating factor 3 (granulocyte)	--				4	Extracellular Space	cytokine	diagnosis		1440	12985	25610
CTSD	cathepsin D	P18242	-1.194	6.05E-01	9.12E-01	2	Cytoplasm	peptidase	diagnosis,unspecified application		1509	13033	171293
CXCL2	chemokine (C-X-C motif) ligand 2	--				4	Extracellular Space	cytokine			2920	14825	81503
Cxcl9	chemokine (C-X-C motif) ligand 9	--				4	Extracellular Space	cytokine				17329	246759
CXCL10	chemokine (C-X-C motif) ligand 10	--				4	Extracellular Space	cytokine	diagnosis,efficacy,unspecified application	MDX-1100	3627	15945	245920
D-glucose	--	--				2	Other	chemical - endogenous mammalian	diagnosis,efficacy,safety
DCC	DCC netrin 1 receptor	P70211-3	1.280	2.61E-06	1.72E-04	1	Plasma Membrane	transmembrane receptor	prognosis		1630	13176	25311
DECR1	2,4-dienoyl CoA reductase 1, mitochondrial	Q9CQ62	1.435	1.42E-05	7.95E-04	2	Cytoplasm	enzyme	unspecified application		1666	67460	117543
DIO3	deiodinase, iodothyronine, type III	--				3	Plasma Membrane	enzyme			1735	107585	29475
DLG2	discs, large homolog 2 (Drosophila)	Q91XM9-4	1.081	3.84E-01	8.08E-01	3	Plasma Membrane	kinase			1740	23859	64053
DLG4	discs, large homolog 4 (Drosophila)	Q62108-3	-1.198	2.32E-02	2.32E-01	3	Plasma Membrane	kinase	unspecified application		1742	13385	29495
DOC2A	double C2-like domains, alpha	Q7TNF0	1.304	1.57E-06	1.10E-04	2	Cytoplasm	transporter			8448	13446	65031
DTNA	dystrobrevin, alpha	Q8CFR5	1.170	1.32E-02	1.62E-01		Plasma Membrane	other	unspecified application		1837	13527	307548
EIF2AK4	eukaryotic translation initiation factor 2 alpha kinase 4	A2AUM2	-1.227	6.88E-01	9.43E-01	4	Cytoplasm	kinase			440275	27103	114859
EOMES	eomesodermin	--					Nucleus	transcription regulator			8320	13813	316052
FGF12	fibroblast growth factor 12	P61329-2	-1.469	2.99E-08	3.01E-06	4	Extracellular Space	other			2257	14167	170630
GDNF	glial cell derived neurotrophic factor	--				3,4	Extracellular Space	growth factor			2668	14573	25453
GLDN	gliomedin	--				4	Cytoplasm	other			342035	235379	315675
GNB1	guanine nucleotide binding protein (G protein), beta polypeptide 1	P62874	-1.010	9.59E-01	9.98E-01	3	Plasma Membrane	enzyme			2782	14688	24400
GRIA1	glutamate receptor, ionotropic, AMPA 1	Q7TNB5	-1.156	7.26E-03	1.11E-01	1	Plasma Membrane	ion channel		talampanel, farampator, LY451395, tezampanel, perampanel, sevoflurane, isoflurane, desflurane, methoxyflurane, enflurane	2890	14799	50592
GRIN1	glutamate receptor, ionotropic, N-methyl D-aspartate 1	P35438-2	-1.913	4.32E-03	7.88E-02	2	Plasma Membrane	ion channel	unspecified application	dextromethorphan/morphine, neramexane, bicifadine, delucemine, nebostinel, besonprodil, UK-240455, dextromethorphan/quinidine, ketamine, felbamate, ifenprodil, memantine, orphenadrine, cycloserine, aspirin/caffeine/orphenadrine, N-(2-indanyl)glycinamide, dextromethorphan, acamprosate, brompheniramine/dextromethorphan/pseudoephedrine, chlorpheniramine/dextromethorphan/phenylephrine, carbinoxamine/…	2902	14810	24408
GRM1	glutamate receptor, metabotropic 1	P97772	-1.061	7.10E-01	9.49E-01	1	Plasma Membrane	G-protein coupled receptor	efficacy	fasoracetam	2911	14816	24414
GRM2	glutamate receptor, metabotropic 2	Q14BI2	1.200	7.06E-03	1.08E-01	2	Plasma Membrane	G-protein coupled receptor		talaglumetad, fasoracetam	2912	108068	24415
GRM3	glutamate receptor, metabotropic 3	Q9QYS2	1.358	1.39E-05	7.89E-04	2	Plasma Membrane	G-protein coupled receptor		fasoracetam	2913	108069	24416
H3F3A/H3F3B	H3 histone, family 3A	E0CZ27	-4.111	2.91E-33	1.92E-30		Nucleus	other	diagnosis		3020|3021	15078|15081	117056|100361558
HIP1	huntingtin interacting protein 1	Q8VD75	1.258	6.61E-01	9.36E-01	2	Cytoplasm	other			3092	215114	192154
HMGCS2	3-hydroxy-3-methylglutaryl-CoA synthase 2 (mitochondrial)	P54869	2.298	3.15E-08	3.12E-06	4	Cytoplasm	enzyme	unspecified application		3158	15360	24450
HOMER1	homer scaffolding protein 1	Q9Z2Y3	1.173	3.83E-01	8.08E-01	1	Plasma Membrane	other			9456	26556	29546
HRAS	Harvey rat sarcoma viral oncogene homolog	Q61411	-1.092	5.40E-01	8.87E-01	1,2	Plasma Membrane	enzyme	prognosis,safety		3265	15461	293621
HTT	huntingtin	G3X9H5	1.012	9.25E-01	9.95E-01	2	Cytoplasm	transcription regulator	unspecified application		3064	15194	29424
ICA1	islet cell autoantigen 1, 69kDa	D3Z118	1.297	2.26E-07	2.01E-05		Cytoplasm	other	unspecified application		3382	15893	81024
ICAM1	intercellular adhesion molecule 1	--				4	Plasma Membrane	transmembrane receptor	diagnosis,efficacy,prognosis,unspecified application		3383	15894	25464
ID2	inhibitor of DNA binding 2, dominant negative helix-loop-helix protein	--					Nucleus	transcription regulator			3398	15902	25587
IFNG	interferon, gamma	--				4	Extracellular Space	cytokine	diagnosis,efficacy,response to therapy,unspecified application		3458	15978	25712
IFT57	intraflagellar transport 57	F7B458	2.366	3.49E-07	2.80E-05	2	Cytoplasm	other	disease progression		55081	73916	303968
IFT122	intraflagellar transport 122	Q6NWV3	-10.311	9.49E-06	5.58E-04		Nucleus	other			55764	81896	312651
IGF1	insulin-like growth factor 1 (somatomedin C)	--					Extracellular Space	growth factor	diagnosis,efficacy,prognosis,safety	BI 836845	3479	16000	24482
IL2	interleukin 2	--				4	Extracellular Space	cytokine	diagnosis,disease progression,efficacy,response to therapy		3558	16183	116562
IL10	interleukin 10	--				4	Extracellular Space	cytokine	diagnosis,disease progression,efficacy,prognosis,response to therapy,safety,unspecified application		3586	16153	25325
IL17A	interleukin 17A	--				4	Extracellular Space	cytokine	diagnosis,unspecified application	secukinumab	3605	16171	301289
ILK	integrin-linked kinase	O55222	2.275	2.54E-07	2.18E-05	1	Plasma Membrane	kinase			3611	16202	170922
ITGB1	integrin, beta 1 (fibronectin receptor, beta polypeptide, antigen CD29 includes MDF2, MSK12)	P09055	1.239	1.45E-02	1.73E-01	2	Plasma Membrane	transmembrane receptor	disease progression,prognosis		3688	16412	24511
JAK1	Janus kinase 1	--				4	Cytoplasm	kinase	efficacy	tofacitinib, ruxolitinib, momelotinib, INCB039110, INCB052793	3716	16451	84598
JUN	jun proto-oncogene	--				3	Nucleus	transcription regulator	prognosis		3725	16476	24516
KCNJ10	potassium channel, inwardly rectifying subfamily J, member 10	Q9JM63	2.040	1.64E-11	2.28E-09	3	Plasma Membrane	ion channel			3766	16513	29718
KCNJ16	potassium channel, inwardly rectifying subfamily J, member 16	--				3	Plasma Membrane	ion channel			3773	16517	29719
KIF5A	kinesin family member 5A	P33175	-1.174	5.05E-02	3.55E-01	1	Cytoplasm	transporter			3798	16572	314906
L-dopa	--	--				1	Other	chemical - endogenous mammalian
LDLR	low density lipoprotein receptor	--				6	Plasma Membrane	transporter	disease progression,unspecified application		3949	16835	300438
LIPE	lipase, hormone-sensitive	P54310	-1.679	9.92E-02	5.09E-01	3	Cytoplasm	enzyme			3991	16890	25330
LPPR3	lipid phosphate phosphatase-related protein type 3	Q7TPB0	1.339	1.54E-07	1.43E-05		Other	phosphatase			79948	216152	314614
LZTS3	leucine zipper, putative tumor suppressor family member 3	A2AHG0	-1.868	1.13E-01	5.45E-01	3	Cytoplasm	other			9762	241638	280670
MAP2K5	mitogen-activated protein kinase kinase 5	Q9WVS7-2	2.976	7.92E-06	4.75E-04	4	Cytoplasm	kinase			5607	23938	29568
MAP6D1	MAP6 domain containing 1	Q14BB9	-1.559	3.24E-07	2.67E-05	3	Cytoplasm	other			79929	208158	363823
MAPK7	mitogen-activated protein kinase 7	--				4	Cytoplasm	kinase			5598	23939	100912585|114509
MAPT	microtubule-associated protein tau	A0A0A0MQC7	-1.019	7.50E-01	9.58E-01		Plasma Membrane	other	diagnosis,efficacy,unspecified application		4137	17762	29477
MATK	megakaryocyte-associated tyrosine kinase	P41242-3	2.019	2.11E-07	1.90E-05	2	Cytoplasm	kinase			4145	17179	60450
MMP3	matrix metallopeptidase 3	--				4	Extracellular Space	peptidase	diagnosis,efficacy	marimastat	4314	17392	171045
MMP9	matrix metallopeptidase 9	--				2,4	Extracellular Space	peptidase	diagnosis,disease progression,efficacy,prognosis,unspecified application	MMP2 MMP9 inhibitor, GS-5745	4318	17395	81687
MOBP	myelin-associated oligodendrocyte basic protein	Q9D2P8	-5.781	2.08E-07	1.90E-05	2	Cytoplasm	other			4336	17433	25037
MOG	myelin oligodendrocyte glycoprotein	Q61885	-2.394	3.47E-06	2.19E-04	4	Extracellular Space	other			4340	17441	24558
MTOR	mechanistic target of rapamycin (serine/threonine kinase)	Q9JLN9	-1.130	1.73E-01	6.54E-01	4	Nucleus	kinase	efficacy	ridaforolimus, OSI-027, methotrexate/sirolimus/tacrolimus, dactolisib, AZD2014, apitolisib, PKI-179, everolimus/exemestane, lenalidomide/temsirolimus, cc-223, PF-05212384, imatinib/sirolimus, cyclophosphamide/sirolimus, P7170, cyclosporine A/sirolimus/tacrolimus, everolimus/pasireotide, mTOR inhibitor, PWT33597, PQR309, VS-5584, sirolimus, temsirolimus, tacrolimus, everolimus, pimecrolimus	2475	56717	56718
MTTP	microsomal triglyceride transfer protein	O08601	1.624	3.30E-02	2.90E-01	6	Cytoplasm	transporter		lomitapide, hesperetin	4547	17777	310900
MYC	v-myc avian myelocytomatosis viral oncogene homolog	--				3	Nucleus	transcription regulator	diagnosis,efficacy,prognosis,response to therapy,unspecified application		4609	17869	24577
MYL6B	myosin, light chain 6B, alkali, smooth muscle and non-muscle	Q8CI43	-1.658	2.50E-09	2.86E-07		Cytoplasm	other			140465	216459	317454
MYLK	myosin light chain kinase	Q6PDN3-2	1.146	2.73E-01	7.70E-01	2	Cytoplasm	kinase	prognosis		4638	107589	288057
MYO5A	myosin VA (heavy chain 12, myoxin)	D3YZ62	-1.470	3.55E-18	1.01E-15	1	Cytoplasm	enzyme			4644	17918	25017
NCAM1	neural cell adhesion molecule 1	E9QB01	1.480	1.25E-02	1.56E-01	3	Plasma Membrane	other	efficacy,prognosis	BB-10901	4684	17967	24586
NDUFA1	NADH dehydrogenase (ubiquinone) 1 alpha subcomplex, 1, 7.5kDa	O35683	-1.679	1.52E-17	4.10E-15		Cytoplasm	enzyme			4694	54405	363441
NDUFA3	NADH dehydrogenase (ubiquinone) 1 alpha subcomplex, 3, 9kDa	Q9CQ91	-1.386	5.51E-06	3.38E-04		Cytoplasm	enzyme			4696	66091	691001|684509
NDUFA5	NADH dehydrogenase (ubiquinone) 1 alpha subcomplex, 5	Q9CPP6	-1.440	1.68E-09	1.96E-07	1	Cytoplasm	enzyme			4698	68202	25488
NDUFA8	NADH dehydrogenase (ubiquinone) 1 alpha subcomplex, 8, 19kDa	Q9DCJ5	-1.539	1.54E-06	1.09E-04	1	Cytoplasm	enzyme			4702	68375	296658
NDUFA12	NADH dehydrogenase (ubiquinone) 1 alpha subcomplex, 12	Q7TMF3	-1.564	8.11E-12	1.27E-09		Cytoplasm	enzyme			55967	66414	299739
NDUFB4	NADH dehydrogenase (ubiquinone) 1 beta subcomplex, 4, 15kDa	Q9CQC7	-1.520	1.19E-26	6.45E-24		Cytoplasm	transporter			4710	100041273|100042503|68194	501886|499131|688963|691675|100361934|288088
NDUFB5	NADH dehydrogenase (ubiquinone) 1 beta subcomplex, 5, 16kDa	Q9CQH3	-1.468	3.46E-06	2.19E-04		Cytoplasm	enzyme			4711	66046	294964
NDUFB8	NADH dehydrogenase (ubiquinone) 1 beta subcomplex, 8, 19kDa	Q9D6J5	-1.615	9.74E-17	2.41E-14		Cytoplasm	enzyme			4714	67264	293991
NDUFS8	NADH dehydrogenase (ubiquinone) Fe-S protein 8, 23kDa (NADH-coenzyme Q reductase)	Q8K3J1	-1.418	1.38E-13	2.49E-11		Cytoplasm	enzyme			4728	225887	293652
NEFH	neurofilament, heavy polypeptide	P19246	-1.841	1.12E-10	1.41E-08	1	Cytoplasm	other			4744	380684	24587
NEFL	neurofilament, light polypeptide	P08551	-1.466	3.88E-05	1.84E-03	1	Cytoplasm	other			4747	18039	83613
Nefm	neurofilament, medium polypeptide	P08553	-1.492	2.76E-14	5.13E-12	1	Plasma Membrane	other				18040	24588
NFASC	neurofascin	Q810U3	-1.091	3.49E-01	7.90E-01	4	Plasma Membrane	other			23114	269116	116690
NLGN1	neuroligin 1	Q99K10	-1.144	3.74E-01	8.02E-01	3	Plasma Membrane	enzyme			22871	192167	116647
NLGN3	neuroligin 3	Q8BYM5	-1.043	8.21E-01	9.74E-01	3	Plasma Membrane	enzyme			54413	245537	171297
NOS2	nitric oxide synthase 2, inducible	--				4	Cytoplasm	enzyme	diagnosis	pimagedine, triflusal, GW 273629, targinine	4843	18126	24599|497963
NR1H4	nuclear receptor subfamily 1, group H, member 4	--				5	Nucleus	ligand-dependent nuclear receptor	diagnosis		9971	20186	60351
NRCAM	neuronal cell adhesion molecule	Q810U4-2	1.012	9.01E-01	9.91E-01		Plasma Membrane	other			4897	319504	497815
NTN1	netrin 1	--					Extracellular Space	other			9423	18208	114523
OPHN1	oligophrenin 1	Q99J31	-1.177	3.48E-01	7.89E-01	1	Cytoplasm	other			4983	94190	312108
PAX2	paired box 2	--					Nucleus	transcription regulator			5076	18504	293992
PAX7	paired box 7	--					Nucleus	transcription regulator			5081	18509	500574
PCLO	piccolo presynaptic cytomatrix protein	Q9QYX7	-1.105	3.79E-01	8.07E-01	3	Cytoplasm	transporter			27445	26875	56768
PIN1	peptidylprolyl cis/trans isomerase, NIMA-interacting 1	Q9QUR7	-1.322	2.07E-03	4.60E-02	1	Nucleus	enzyme			5300	23988	298696
PLK2	polo-like kinase 2	--				3	Nucleus	kinase			10769	20620	83722
PLLP	plasmolipin	Q9DCU2	-1.859	4.54E-07	3.55E-05		Plasma Membrane	transporter			51090	67801	64364
PMPCB	peptidase (mitochondrial processing) beta	Q9CXT8	1.684	1.22E-10	1.51E-08	3	Cytoplasm	peptidase			9512	73078	64198
PPARD	peroxisome proliferator-activated receptor delta	--				1	Nucleus	ligand-dependent nuclear receptor	diagnosis	treprostinil, icosapent, GW501516, bezafibrate	5467	19015	25682
PPARG	peroxisome proliferator-activated receptor gamma	--				3	Nucleus	ligand-dependent nuclear receptor	diagnosis,efficacy,unspecified application	icosapent, amlodipine/telmisartan, inolitazone, aleglitazar, aspirin/dipyridamole/telmisartan, clopidogrel/telmisartan, glimepiride/rosiglitazone, nicotinic acid/pioglitazone, alogliptin/pioglitazone, glimepiride/pioglitazone, rosiglitazone, farglitazar, sulfasalazine, pioglitazone, telmisartan, tesaglitazar, troglitazone, hydrochlorothiazide/telmisartan, balsalazide, mesalamine, bezafibrate	5468	19016	25664
PPARGC1A	peroxisome proliferator-activated receptor gamma, coactivator 1 alpha	--				2	Nucleus	transcription regulator	diagnosis,efficacy		10891	19017	83516
Ppp1cc	protein phosphatase 1, catalytic subunit, gamma isoform	P63087-2	1.086	7.01E-01	9.47E-01	1	Cytoplasm	phosphatase				19047	24669
PPP1R9A	protein phosphatase 1, regulatory subunit 9A	H3BKQ7	-1.331	1.75E-05	9.43E-04	1	Plasma Membrane	other			55607	243725	84685
PPP3CA	protein phosphatase 3, catalytic subunit, alpha isozyme	P63328	-1.023	8.41E-01	9.78E-01	2	Cytoplasm	phosphatase		voclosporin, tacrolimus, pimecrolimus, cyclosporin A	5530	19055	24674
PRKAB1	protein kinase, AMP-activated, beta 1 non-catalytic subunit	Q9R078	2.202	7.18E-33	4.26E-30	2	Nucleus	kinase			5564	19079	83803
PRKCB	protein kinase C, beta	P68404-2	1.019	8.66E-01	9.85E-01	2	Cytoplasm	kinase	diagnosis,efficacy,unspecified application	sotrastaurin, enzastaurin, ruboxistaurin, ingenol mebutate	5579	18751	25023
PRPH	peripherin	--				1	Plasma Membrane	other			5630	19132	24688
PURA	purine-rich element binding protein A	P42669	1.221	2.18E-01	7.10E-01	1	Nucleus	transcription regulator			5813	19290	307498
RASA3	RAS p21 protein activator 3	Q60790	-3.192	1.70E-05	9.31E-04	1	Plasma Membrane	ion channel			22821	19414	29372
RPL27	ribosomal protein L27	P61358	-1.352	8.76E-06	5.21E-04	3	Cytoplasm	other			6155	19942	64306
SH3GL1	SH3-domain GRB2-like 1	Q62419	1.407	1.13E-05	6.51E-04	1	Cytoplasm	other			6455	20405	81922
SHANK3	SH3 and multiple ankyrin repeat domains 3	A0A0A0MQD5	-2.396	2.81E-13	4.87E-11	3	Plasma Membrane	other			85358	58234	59312
SIPA1L1	signal-induced proliferation-associated 1 like 1	Q8C0T5	-1.722	7.40E-07	5.50E-05	3	Cytoplasm	other			26037	217692	246212
SLC1A2	solute carrier family 1 (glial high affinity glutamate transporter), member 2	P43006	1.371	1.61E-02	1.83E-01	2	Plasma Membrane	transporter		riluzole	6506	20511	29482
SLC1A3	solute carrier family 1 (glial high affinity glutamate transporter), member 3	P56564	2.180	2.81E-07	2.35E-05	2	Plasma Membrane	transporter		riluzole	6507	20512	29483
SLCO1C1	solute carrier organic anion transporter family, member 1C1	--					Plasma Membrane	transporter			53919	58807	84511
SOD1	superoxide dismutase 1, soluble	P08228	-1.018	8.78E-01	9.86E-01	1	Cytoplasm	enzyme	unspecified application		6647	20655	24786
SPTBN2	spectrin, beta, non-erythrocytic 2	Q68FG2	-1.484	7.62E-06	4.62E-04	1	Cytoplasm	other			6712	20743	29211
SPTBN4	spectrin, beta, non-erythrocytic 4	E9PX29	-1.268	3.78E-04	1.23E-02	4	Cytoplasm	other			57731	80297	308458
SRC	SRC proto-oncogene, non-receptor tyrosine kinase	P05480	1.142	4.25E-01	8.39E-01	2	Cytoplasm	kinase	diagnosis,disease progression,efficacy,prognosis,response to therapy	dasatinib, AZM-475271, saracatinib, nintedanib, KX-01, pexmetinib, AZD0424, bosutinib	6714	20779	83805
STAT3	signal transducer and activator of transcription 3 (acute-phase response factor)	P42227-2	-1.145	3.15E-01	7.81E-01	4	Nucleus	transcription regulator	diagnosis,efficacy,prognosis,response to therapy		6774	20848	25125
STMN3	stathmin-like 3	O70166	-1.427	7.63E-37	6.48E-34		Nucleus	other			50861	20262	29246
SYNGAP1	synaptic Ras GTPase activating protein 1	F6SEU4	-2.092	1.45E-06	1.03E-04	3	Plasma Membrane	other			8831	240057	192117
SYNJ1	synaptojanin 1	E9Q7S0	1.016	9.11E-01	9.92E-01	1	Cytoplasm	phosphatase			8867	104015	85238
SYP	synaptophysin	Q62277	-1.115	6.27E-01	9.23E-01	3	Cytoplasm	transporter			6855	20977	24804
THRA	thyroid hormone receptor, alpha	--				3	Nucleus	ligand-dependent nuclear receptor		3,5-diiodothyropropionic acid, denosumab/levothyroxine, amiodarone, levothyroxine, dextrothyroxine, L-triiodothyronine	7067	21833	81812
TNR	tenascin R	Q8BYI9	-1.098	3.10E-01	7.81E-01		Plasma Membrane	other			7143	21960	25567
TP53	tumor protein p53	--				2	Nucleus	transcription regulator	diagnosis,disease progression,efficacy,prognosis,response to therapy,unspecified application	CGM097, kevetrin	7157	22059	24842
TSPAN3	tetraspanin 3	--				2	Plasma Membrane	other			10099	56434	300733
TTC8	tetratricopeptide repeat domain 8	Q8VD72-2	-2.238	1.83E-15	3.86E-13		Cytoplasm	other			123016	76260	299246
UBA6	ubiquitin-like modifier activating enzyme 6	Q8C7R4	-1.068	5.27E-01	8.85E-01		Cytoplasm	enzyme			55236	231380	305268
UBE2G1	ubiquitin-conjugating enzyme E2G 1	P62254	-1.509	1.20E-05	6.87E-04		Cytoplasm	enzyme			7326	67128	64631
VAMP1	vesicle-associated membrane protein 1 (synaptobrevin 1)	Q62442-2	-1.571	7.06E-13	1.16E-10	3	Cytoplasm	transporter		botulinum toxin type B	6843	22317
VAMP2	vesicle-associated membrane protein 2 (synaptobrevin 2)	P63044	-1.055	4.42E-01	8.44E-01	1,3	Plasma Membrane	other		botulinum toxin type B	6844	22318	24803
VCAM1	vascular cell adhesion molecule 1	Q3UPN1	1.353	3.70E-02	3.08E-01	2,4	Plasma Membrane	transmembrane receptor	diagnosis,disease progression,efficacy,prognosis,unspecified application		7412	22329	25361
VIP	vasoactive intestinal peptide	--				2	Extracellular Space	other	efficacy		7432	22353	117064
WDR17	WD repeat domain 17	H3BLI8	2.108	9.11E-17	2.35E-14	1	Other	other			116966	244484	364653
YARS2	tyrosyl-tRNA synthetase 2, mitochondrial	Q8BYL4	1.534	1.11E-05	6.48E-04		Cytoplasm	enzyme			51067	70120	287924
ZFP36L2	ZFP36 ring finger protein-like 2	--				1	Nucleus	transcription regulator	unspecified application		678	12193	298765|100911319
ZFYVE27	zinc finger, FYVE domain containing 27	Q3TXX3-2	1.353	7.92E-04	2.26E-02	3	Plasma Membrane	other			118813	319740	309376
